# Supplementary material
Source: PubMed Central journal article supplement (PMC5386396)
Supplement: NIHMS843524-supplement-1.pdf [file NIHMS843524-supplement-1.pdf]

Supplementary Information for

***The Crebbp acetyltransferase is a haploinsufficient tumor suppressor in B cell lymphoma***

Jiyuan Zhang<sup>1</sup>, Sofija Vlasevska<sup>1</sup>, Victoria A. Wells<sup>1</sup>, Sarah Nataraj<sup>1</sup>, Antony B. Holmes<sup>1</sup>, Romain Duval<sup>1</sup>, Stefanie N. Meyer<sup>1</sup>, Tongwei Mo<sup>1</sup>, Katia Basso<sup>1,2</sup>, Paul K Brindle<sup>3</sup>, Shafinaz Hussein<sup>4</sup>, Riccardo Dalla-Favera<sup>1,2,5,6,7</sup> and Laura Pasqualucci<sup>1,2,7\*</sup>

<sup>1</sup> Institute for Cancer Genetics, Columbia University, New York, NY 10032, USA

<sup>2</sup> Department of Pathology and Cell Biology, Columbia University, New York, NY, 10032, USA

<sup>3</sup> Department of Biochemistry, St. Jude Children's Research Hospital, Memphis, TN

<sup>4</sup> Department of Pathology and Laboratory Medicine, NorthWell Health, Staten Island University Hospital, Staten Island, New York, USA

<sup>5</sup> Department of Genetics & Development, Columbia University, New York, NY, 10032, USA

<sup>6</sup> Department of Microbiology & Immunology, Columbia University, New York, NY, 10032, USA

<sup>7</sup> Herbert Irving Comprehensive Cancer Center, Columbia University, New York, NY, 10032, USA

\*Correspondence: [lp171@columbia.edu](mailto:lp171@columbia.edu)

## SI Guide

|                                 |                                                                                                                                                |
|---------------------------------|------------------------------------------------------------------------------------------------------------------------------------------------|
| <b>Supplementary Figure S1.</b> | CREBBP binds to GC-specific super-enhancers                                                                                                    |
| <b>Supplementary Figure S2.</b> | Crebbp and EP300 expression in the B cell lineage                                                                                              |
| <b>Supplementary Figure S3.</b> | GSEA of <i>Crebbp</i> -conditional knock-out GC B cells and human DZ vs LZ B cells                                                             |
| <b>Supplementary Figure S4.</b> | Analysis of GC B cell responses in <i>Crebbp<sup>fl/fl</sup> Cγ1-Cre</i> and <i>CD19-Cre</i> cohorts                                           |
| <b>Supplementary Figure S5.</b> | Analysis of plasma cell differentiation in <i>Crebbp<sup>fl/fl</sup> Cγ1-Cre</i> and <i>CD19-Cre</i> cohorts                                   |
| <b>Supplementary Figure S6.</b> | Distribution pattern of <i>CREBBP</i> mutations in FL and <i>de novo</i> DLBCL                                                                 |
| <b>Supplementary Figure S7.</b> | Analysis of <i>Crebbp</i> conditional knock-out tumor cohorts                                                                                  |
| <b>Supplementary Table S1.</b>  | Overlap between CREBBP bound regions and predicted super-enhancers in GC B cells                                                               |
| <b>Supplementary Table S2.</b>  | Genes differentially expressed in <i>Crebbp<sup>fl/fl</sup></i> vs <i>Crebbp<sup>+/+</sup></i> GC B cells                                      |
| <b>Supplementary Table S3.</b>  | List of CREBBP “core target” genes (bound by CREBBP in human GC B cells and downregulated in <i>Crebbp<sup>fl/fl</sup> Cγ1-Cre</i> GC B cells) |
| <b>Supplementary Table S4.</b>  | Pathway enrichment analysis of CREBBP "core target" genes                                                                                      |
| <b>Supplementary Table S5.</b>  | Leading edge associated with GSEA of CREBBP core target genes in the rank of genes differentially expressed in DZ vs LZ GC B cells             |
| <b>Supplementary Table S6.</b>  | Pathway enrichment analysis of genes co-bound by CREBBP and BCL6 in human GC B cells                                                           |
| <b>Supplementary Table S7.</b>  | V gene rearrangement analysis of B-cell lymphomas in the <i>Crebbp<sup>fl/+</sup> / Cγ1-Cre /VavP-BCL2</i> conditional knock-out mouse model   |
| <b>Supplementary Table S8.</b>  | List of antibodies used in FACS analysis                                                                                                       |

## SUPPLEMENTARY FIGURE LEGENDS

**Supplementary Figure S1. CREBBP binds to GC-specific super-enhancers.** ChIP-seq plots of CREBBP and H3K27Ac binding at genes associated with GC-specific super-enhancers (SE), as predicted by the ROSE algorithm. Read density tracks of BCL6, H3K4me1, H3K4me3 and H3K27me3 ChIP-Seq enrichment are also shown.

**Supplementary Figure S2. CREBBP and EP300 expression in the B cell lineage.** **A**, CREBBP and EP300 mRNA expression levels in naive, GC and memory B cells purified from reactive human tonsils, measured by RNA-seq ( $n = 3$  donors each, representing 3 biological replicates; mean  $\pm$  SD). Data were normalized to the total number of mapped reads in each sample and to the transcript size, and are expressed as reads per kilobase per million mapped reads (RPKM). **B**, CREBBP and EP300 protein expression in human naive, GC and memory B cells. BCL6 controls for the identity of the populations and tubulin serves as loading control. **C**, CREBBP and EP300 mRNA expression in GC dark zone (DZ) and light zone (LZ) B cells sorted from reactive human tonsils (left bars) or from the spleen of immunized mice (right bars), and analyzed by gene expression profiling using Affymetrix HG U133\_plus 2 (human) or MG 430\_2.0 (mouse) arrays (Accession No: GSE38697 and GSE38696, respectively). Data (MAS5-normalized) are expressed as linear absolute levels, and the probe ID is provided for each transcript ( $n = 3$  donors/subset, representing biological replicates; mean  $\pm$  SD). \*  $P < 0.05$ , \*\*  $P < 0.01$ , Student's  $t$ -test. Only statistically significant differences are indicated. **D**, CREBBP and EP300 mRNA expression levels during hematopoietic development in the mouse, as obtained from the Immgen.org database at <https://www.immgen.org/>. All data were generated on the Affymetrix Mouse Gene 1.0ST array.

**Supplementary Figure S3. GSEA of *Crebbp*-conditional knockout GC B cells and human GC DZ vs LZ cells.** **A**, Enrichment plots of selected gene sets in the rank of genes differentially expressed between *Crebbp*<sup>fl/fl</sup> *Cγ1-Cre* (KO) and *Crebbp*<sup>+/+</sup> *Cγ1-Cre* (WT) GC B cells. The preferential enrichment of previously identified FOXO1-bound genes in the *Crebbp*-proficient cells may reflect subtle changes imposed by *Crebbp* loss on transcription, which were not detected in the less sensitive, supervised gene expression analysis. **B**, Enrichment plots of the top 500 CREBBP-bound genes in the rank of genes differentially expressed between GC DZ and LZ cells (left panel). The analysis was performed separately with the top 500 genes bound by CREBBP at promoter regions (middle panel) or at TSS-distal, putative enhancer regions (right panel). Bound genes were identified as described in Methods and were ranked based on increasing  $P$  value.

**Supplementary Figure S4. Analysis of GC B cell responses in *Crebbp*<sup>fl/fl</sup> *Cγ1-Cre* and *CD19-Cre* cohorts.** **A**, Immunofluorescence staining of CREBBP and EP300 in representative spleen sections from SRBC immunized *Cγ1-Cre* mice. PNA (green) identifies the GC area (outlined). **B**, Representative flow cytometric analysis of splenic B220<sup>+</sup> cells from 12-16 week-old *Crebbp*<sup>+/+</sup> (WT), *Crebbp*<sup>fl/+</sup> (HET), and *Crebbp*<sup>fl/fl</sup> (KO) *Cγ1-Cre* mice analyzed 10 days after SRBC immunization. GC B cells are identified as CD95<sup>+</sup>PNA<sup>hi</sup> cells, and numbers in each panel indicate the percentage in the gate. **C**, Percentage of GC B cells in mice from the indicated genotypes, analyzed at 3 months of age, 10 days after SRBC immunization. **D**, Representative contour plots of GC B cell DZ (CXCR4<sup>hi</sup>CD86<sup>lo</sup>) and LZ (CXCR4<sup>lo</sup>CD86<sup>hi</sup>) populations in *Cγ1-*

*Cre* mice of the indicated genotypes, analyzed 10 days after SRBC immunization according to an established gating strategy (1-3); cells are gated on the B220<sup>+</sup>CD95<sup>+</sup>PNA<sup>hi</sup> population, and numbers in each panel indicate the percentage in the DZ and LZ gates. **E**, Western blot analysis of *Crebbp* and Ep300 in sorted GC B cells from *Crebbp*<sup>+/+</sup> (WT), *Crebbp*<sup>fl/+</sup> (HET), and *Crebbp*<sup>fl/fl</sup> (KO) *CD19-Cre* mice. The relative intensity of the bands is quantified below the image after normalization for the loading control, with the wild type band arbitrarily set as 1. *Bcl6* serves as control for the identity of the population. **F**, Representative flow cytometric analysis of splenic B220<sup>+</sup> cells from 12-16 week-old mice of the indicated genotypes in the *CD19-Cre* cohort, analyzed 10 days after SRBC immunization. **G**, Percentage of GC B cells in mice from the indicated genotypes, analyzed at 3 months of age, 10 days after SRBC immunization. **H**, Analysis of DZ and LZ GC B cells in the *CD19-Cre* cohort. In all panels, *ns* denotes not significant, as calculated by one-way ANOVA.

**Supplementary Figure S5. Analysis of plasma cell differentiation in *Crebbp*<sup>fl/fl</sup> *Cγ1-Cre* and *CD19* cohorts.** **A**, Representative flow cytometric analysis of splenic plasma cells and surface IgG1<sup>+</sup> B cells in *Crebbp*<sup>+/+</sup> (WT), *Crebbp*<sup>fl/+</sup> (HET), and *Crebbp*<sup>fl/fl</sup> (KO) *Cγ1-Cre* mice. Numbers denote the percentage of cells within the gate, relative to total lymphocytes. **B**, Percentage (top) and absolute number (bottom) of bone marrow (BM) plasma cells in 12-16 week-old mice of the indicated genotypes, analyzed 10 days after SRBC immunization. Each symbol represents one mouse, and the horizontal bar denotes the mean. **C**, Quantification of frequencies (top) and absolute numbers (bottom) of splenic plasma cells, BM plasma cells, and IgG1<sup>+</sup> B cells in the *CD19-Cre* cohort, illustrated as in **B** (cumulative data from at least two independent experiments performed on 3-4 mice each, 10 days after SRBC immunization; data for BM plasma cells are also provided at day 7 post-secondary immunization in the far right panels). As reported, *Crebbp*<sup>fl/fl</sup> *CD19-Cre* mice show reduced percentages and numbers of B220<sup>+</sup> cells (not shown) (4), impacting on the number of all mature B cell subsets. \* *P* < 0.05, \*\*\* *P* < 0.005, one-way ANOVA. **D**, Antibody titers in the serum of 12-16 week-old *Crebbp*-floxed *CD19-Cre* mice, measured before (top) and 14 days after (bottom) immunization with the T-cell specific NP-KLH hapten. IgG3 and IgA titers were only obtained from 5 of the 6, *Crebbp* KO animals, due to insufficient amounts of serum. \* *P* < 0.05, \*\* *P* < 0.01, Student's *t*-test. Only statistically significant differences are highlighted in the figure.

**Supplementary Figure S6. Distribution pattern of *CREBBP* mutations in FL and *de novo* DLBCL.** **A**, Percentage of *CREBBP* mutated samples showing monoallelic (red) vs biallelic (grey) mutations in DLBCL and FL/transformed FL (tFL). The total number of cases analyzed is given below the pie. **B**, Overall percentage of *CREBBP/EP300* mutated cases harboring concurrent chromosomal translocations of *BCL2* in FL, GCB-DLBCL and ABC-DLBCL. Data in the left panel refer to *CREBBP* mutated/deleted cases, while data in the right panel also include *EP300* mutated cases. **C**, Distribution of *CREBBP* mutations, *EP300* mutations and *BCL2* chromosomal translocations in FL, GCB-DLBCL and ABC-DLBCL samples. In the heatmap, each column represents one case, and color codes denote the presence (red) or absence (white) of the genetic lesion. Tx, translocation; M, mutation; D, deletion. Only cases with available information for all indicated lesions were included in the analysis displayed in panels **B** and **C**. DLBCL data integrate published studies by our group, while data on FL cases derive from Morin et al., Nature 2011.

**Supplementary Figure S7. Analysis of *Crebbp* conditional knock-out tumor cohorts.** **A**, Event-free survival curve in *Crebbp<sup>fl/fl</sup>Cy1-Cre* and compound *Crebbp<sup>fl/+</sup>Cy1-Cre/VavP-BCL2* cohorts. Statistical significance was assessed using a long-rank (Mantel-Cox) test and showed no differences between genotypes within each cohort. **B**, Spleen/body weight ratio in compound *Crebbp<sup>fl/+</sup>Cy1-Cre/VavP-BCL2* and *Crebbp<sup>+/+</sup>Cy1-Cre/VavP-BCL2* animals. **C**, Histologic and immunohistochemical characterization of a representative lymphoma showing plasmacytic features in the *Crebbp<sup>+/+</sup>Cy1-Cre/VavP-BCL2* cohort (4X magnification; scale bar, 500 $\mu$ m; H&E staining is also shown at 40X magnification). Tumors show diffuse infiltration by proliferating (Ki67<sup>+</sup>) cells with plasmacytic morphology, which lack the B cell markers B220 and Pax5, as well as the GC B cell marker Bcl6, and express Irf4; positivity for the human BCL2 protein confirms the expression of the BCL2 transgene in the tumor cells. A normal spleen (top right panel) serves as negative control for the Irf4 staining. **D**, Western blot analysis of H3K27 acetylation in purified B220<sup>+</sup> splenocytes from *Crebbp<sup>+/+</sup>* (WT), *Crebbp<sup>fl/+</sup>* (HET), and *Crebbp<sup>fl/fl</sup>* (KO) *CD19-Cre* mice. Quantification of signal intensity, after normalization for total histones, is provided in panel E (color codes as in D).

### Supplementary References

1. Victora GD, Dominguez-Sola D, Holmes AB, Deroubaix S, Dalla-Favera R, Nussenzweig MC. Identification of human germinal center light and dark zone cells and their relationship to human B-cell lymphomas. *Blood* **2012**;120(11):2240-8 doi 10.1182/blood-2012-03-415380.
2. Victora GD, Schwickert TA, Fooksman DR, Kamphorst AO, Meyer-Hermann M, Dustin ML, *et al.* Germinal center dynamics revealed by multiphoton microscopy with a photoactiva fluorescent reporter. *Cell* **2010**;143(4):592-605 doi 10.1016/j.cell.2010.10.032.
3. Allen CD, Ansel KM, Low C, Lesley R, Tamamura H, Fujii N, *et al.* Germinal center dark and light zone organization is mediated by CXCR4 and CXCR5. *Nat Immunol* **2004**;5(9):943-52 doi 10.1038/ni1100.
4. Xu W, Fukuyama T, Ney PA, Wang D, Rehg J, Boyd K, *et al.* Global transcriptional coactivators CREB-binding protein and p300 are highly essential collectively but not individually in peripheral B cells. *Blood* **2006**;107(11):4407-16 doi 10.1182/blood-2005-08-3263.
5. Spina V, Khiabani H, Messina M, Monti S, Cascione L, Bruscaggin A, *et al.* The genetics of nodal marginal zone lymphoma. *Blood* **2016**;128(10):1362-73 doi 10.1182/blood-2016-02-696757.

# Supplementary Fig. S1

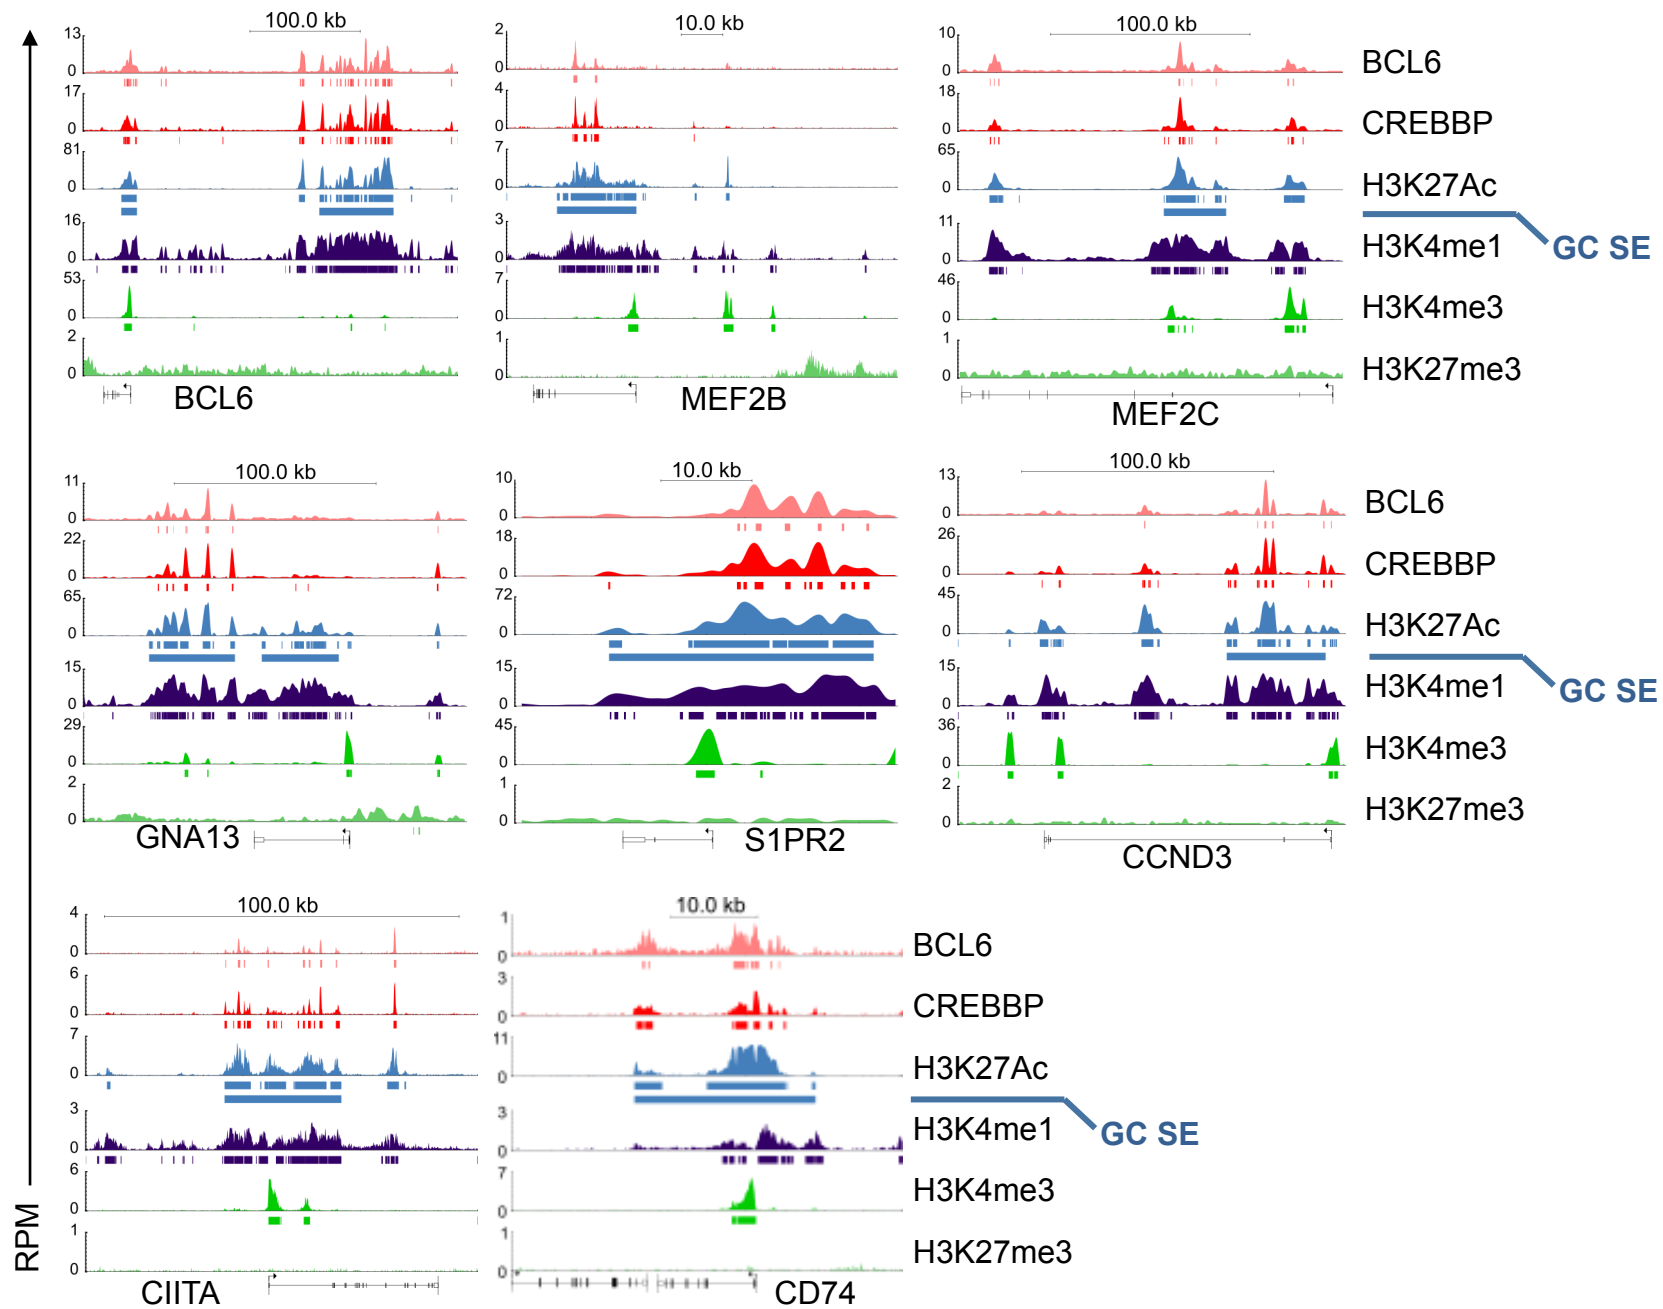

# Supplementary Fig. S2

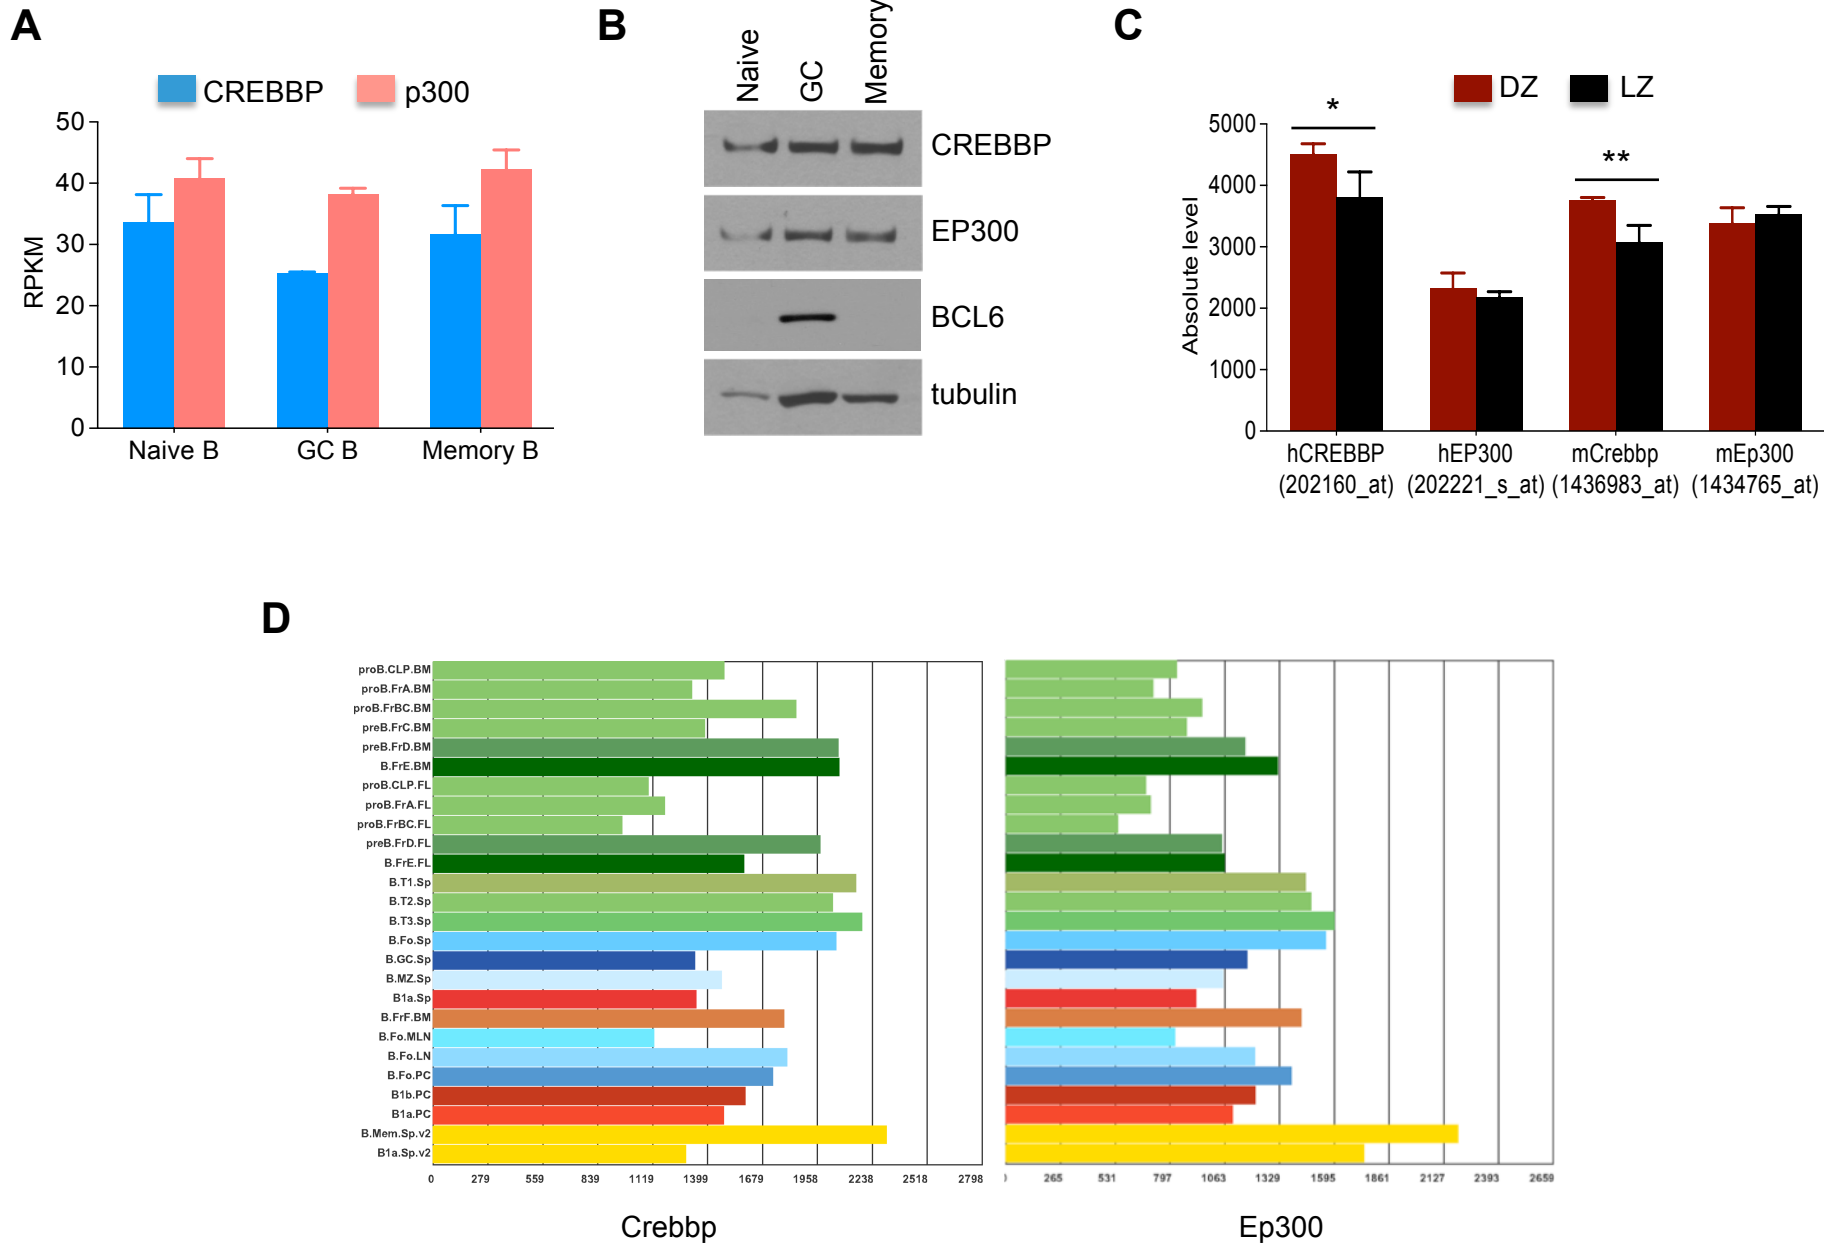

**A**

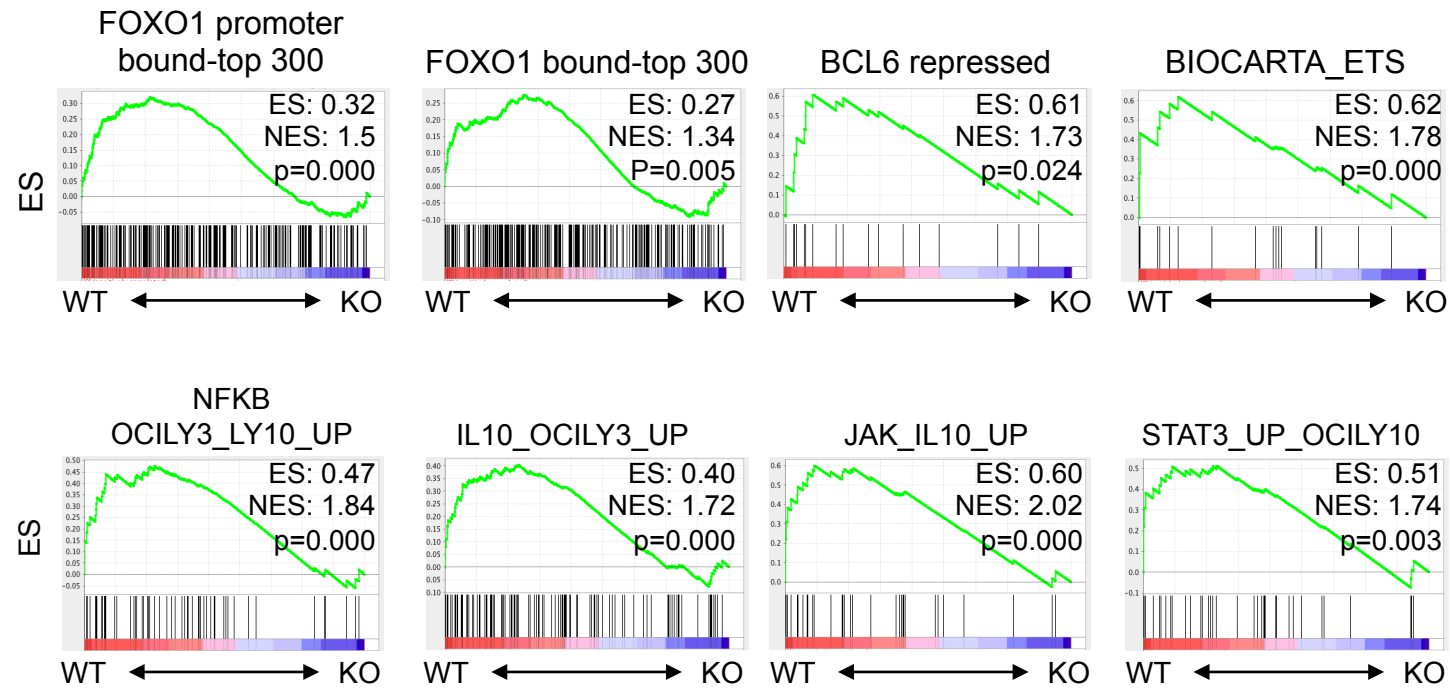

**B**

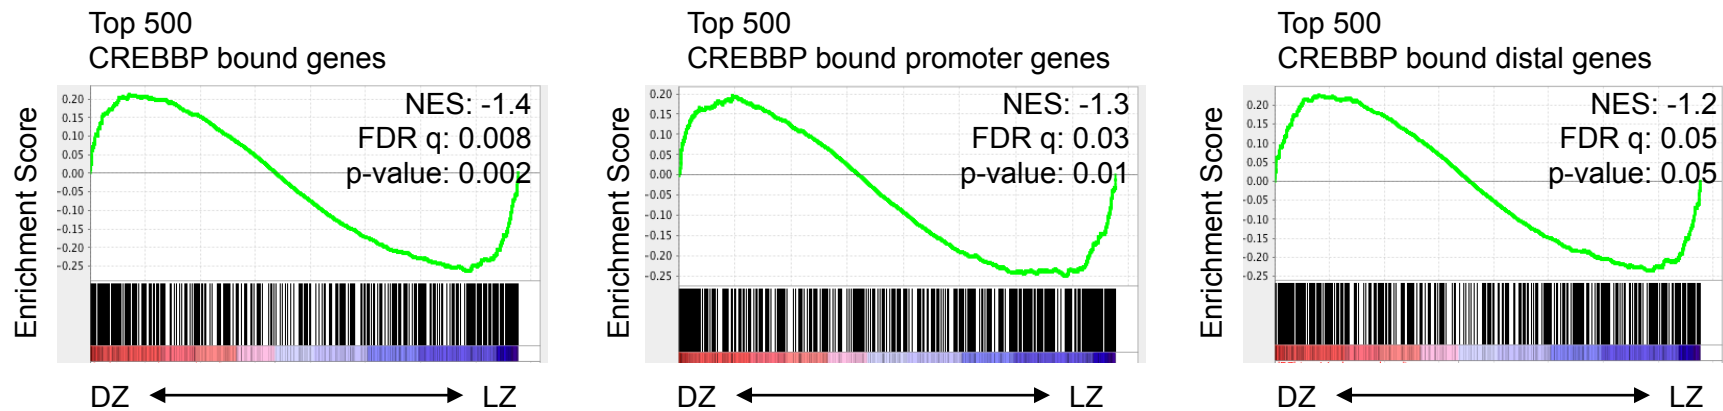



Supplementary Fig. S4

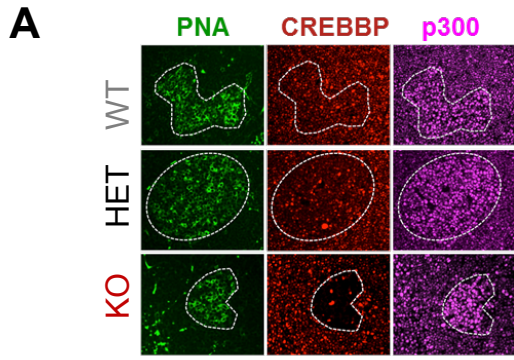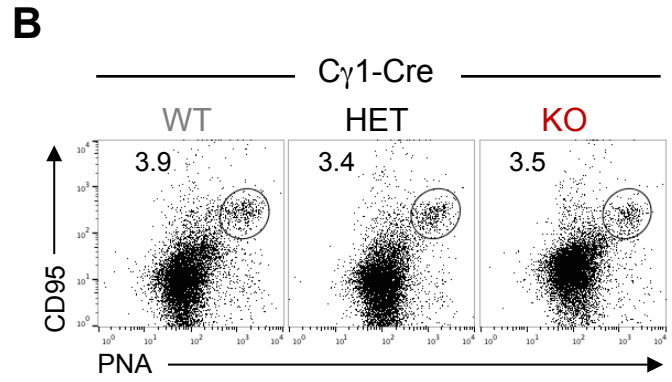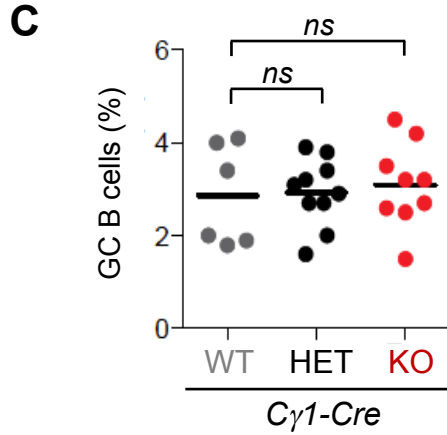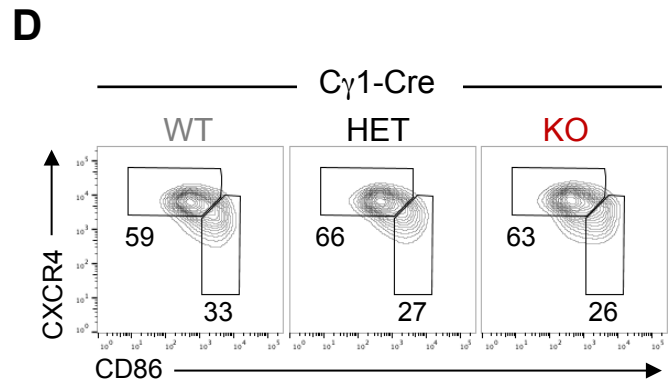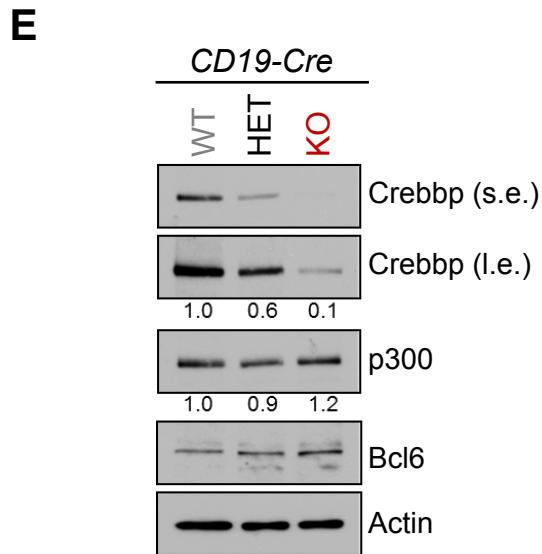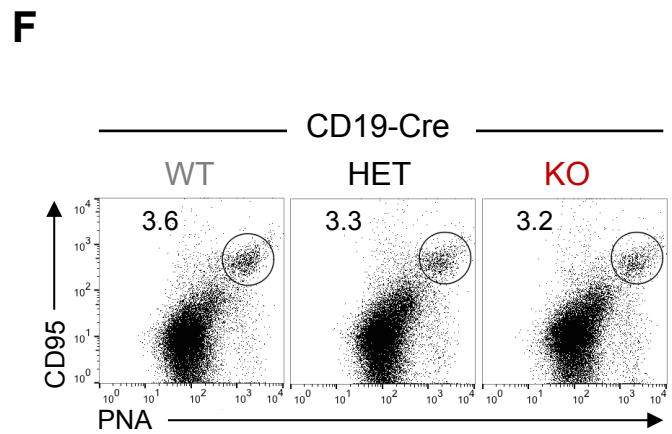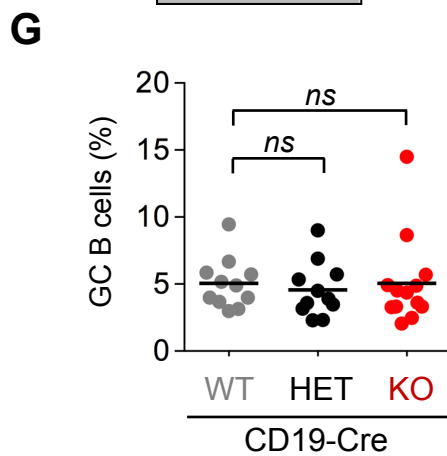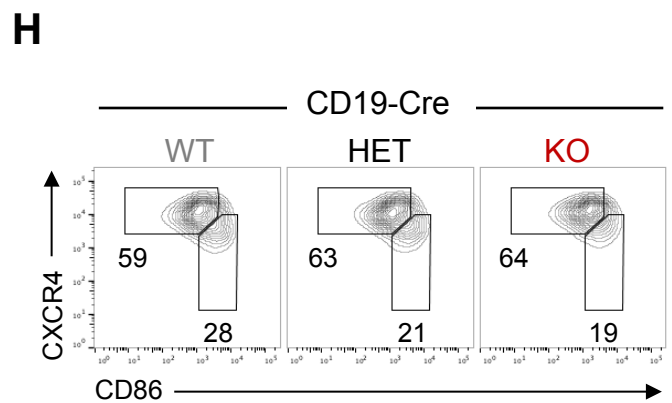

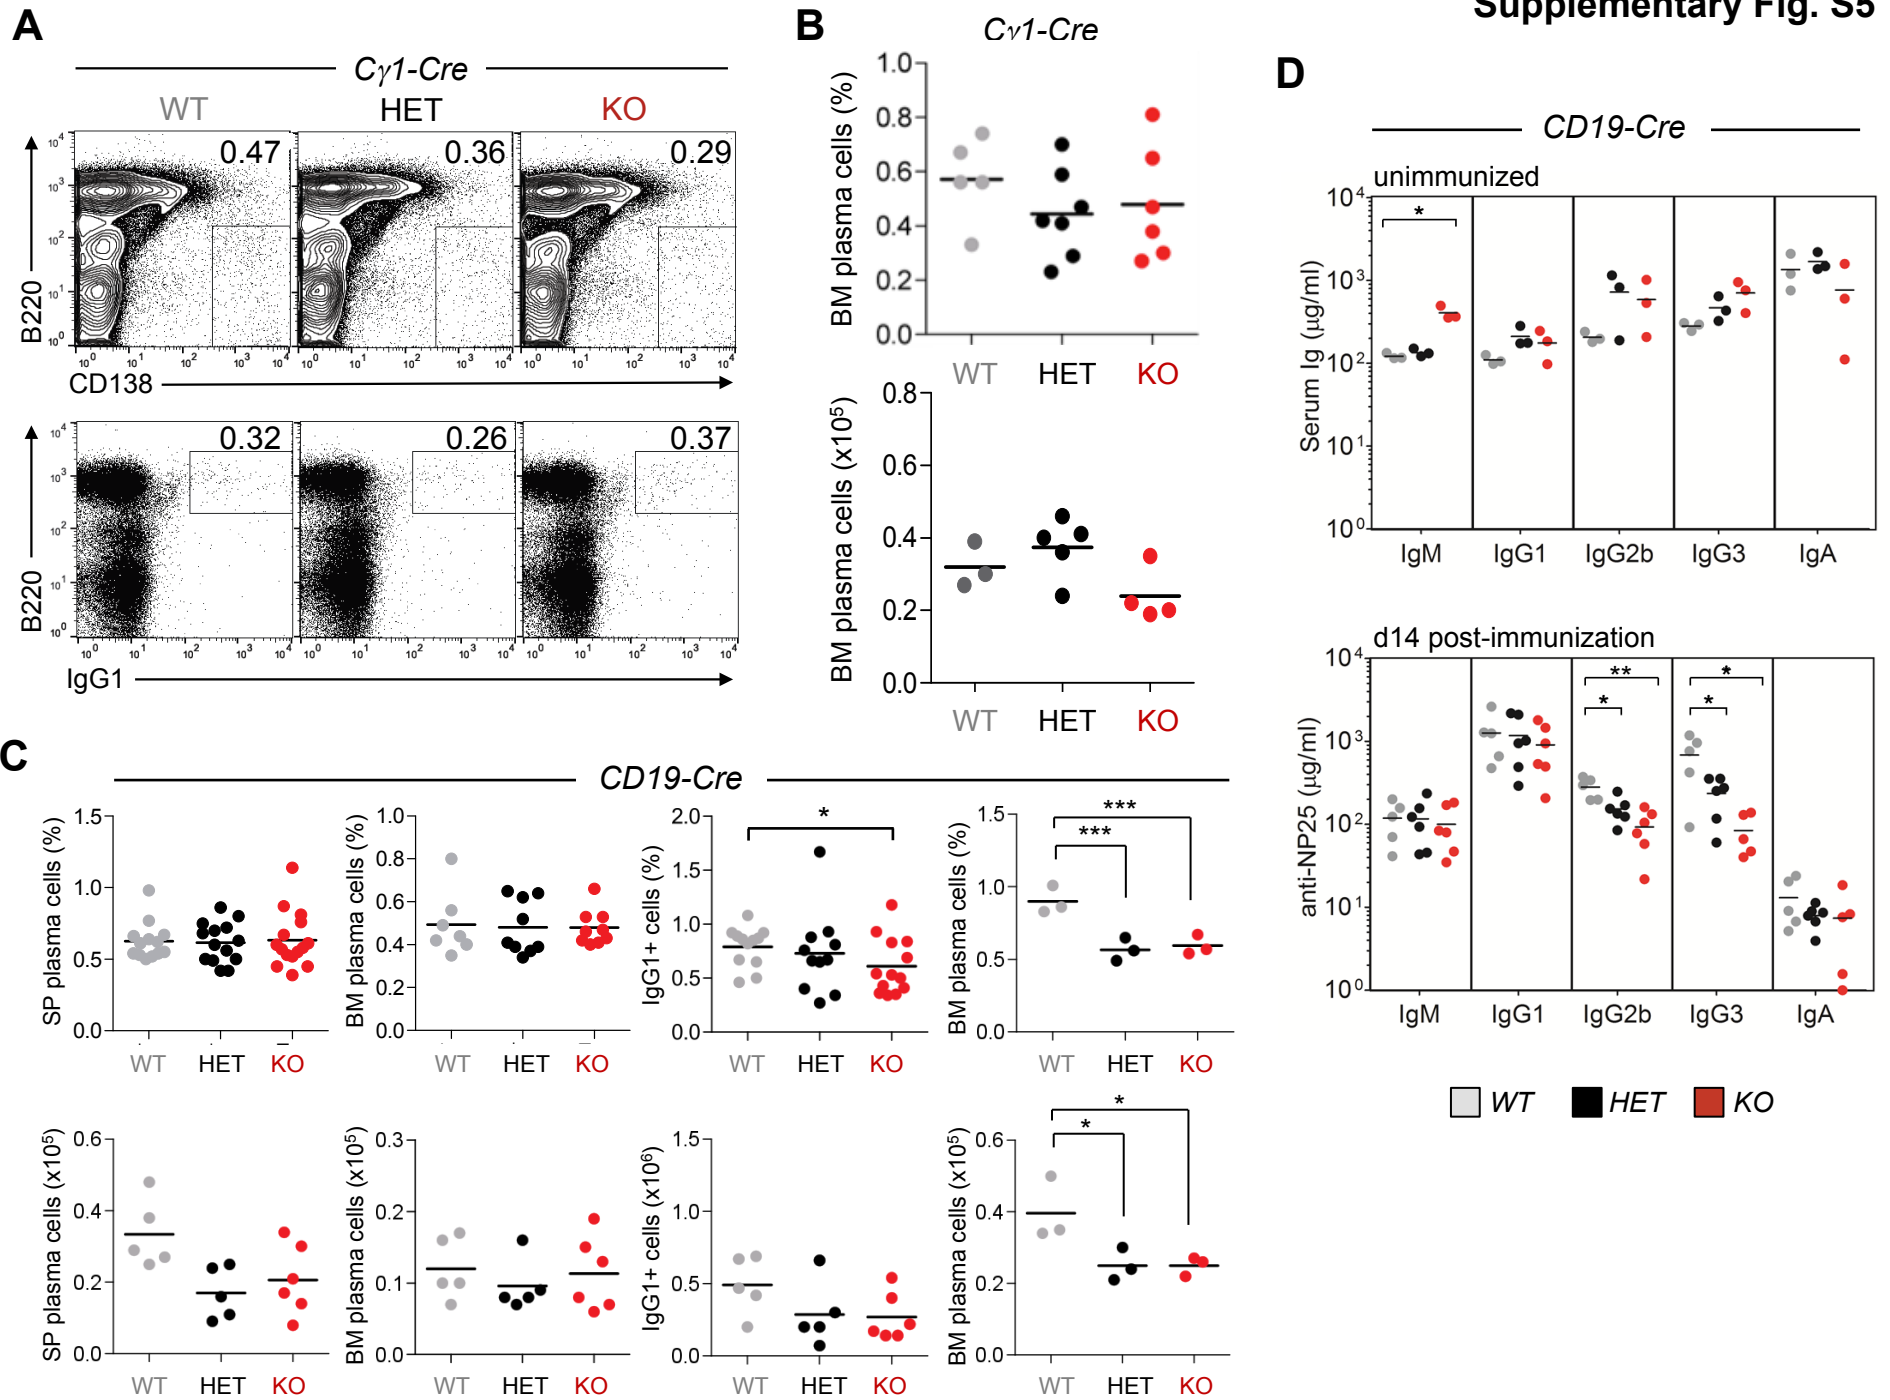

Supplementary Fig. S6

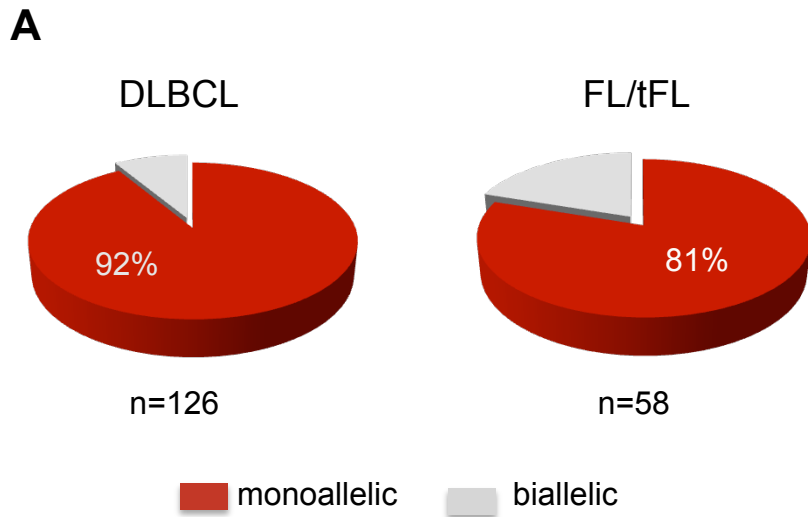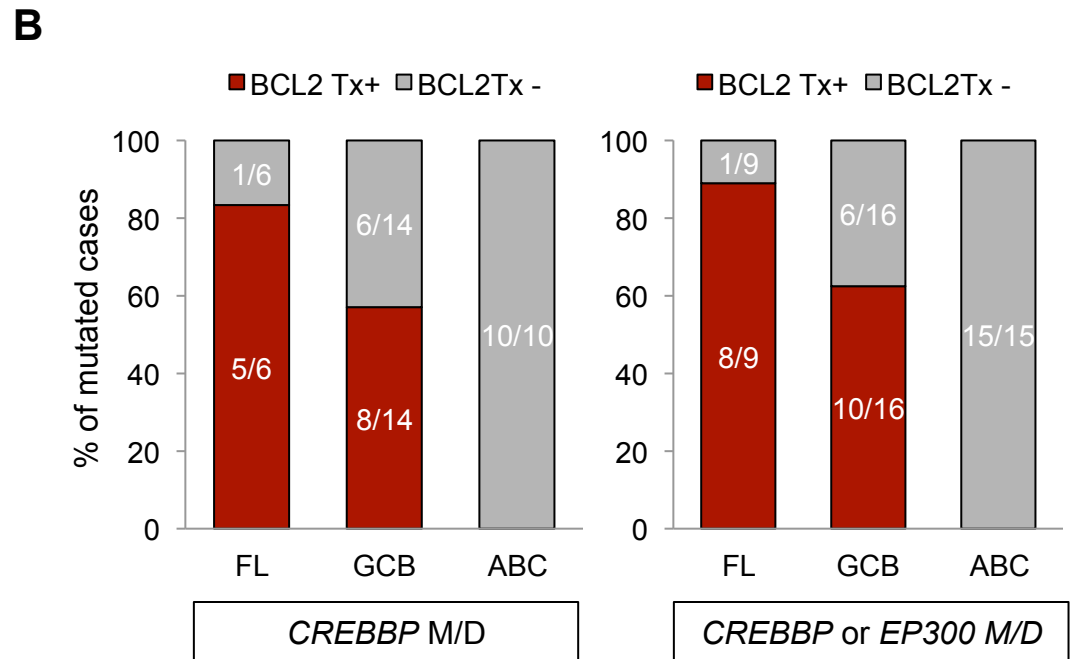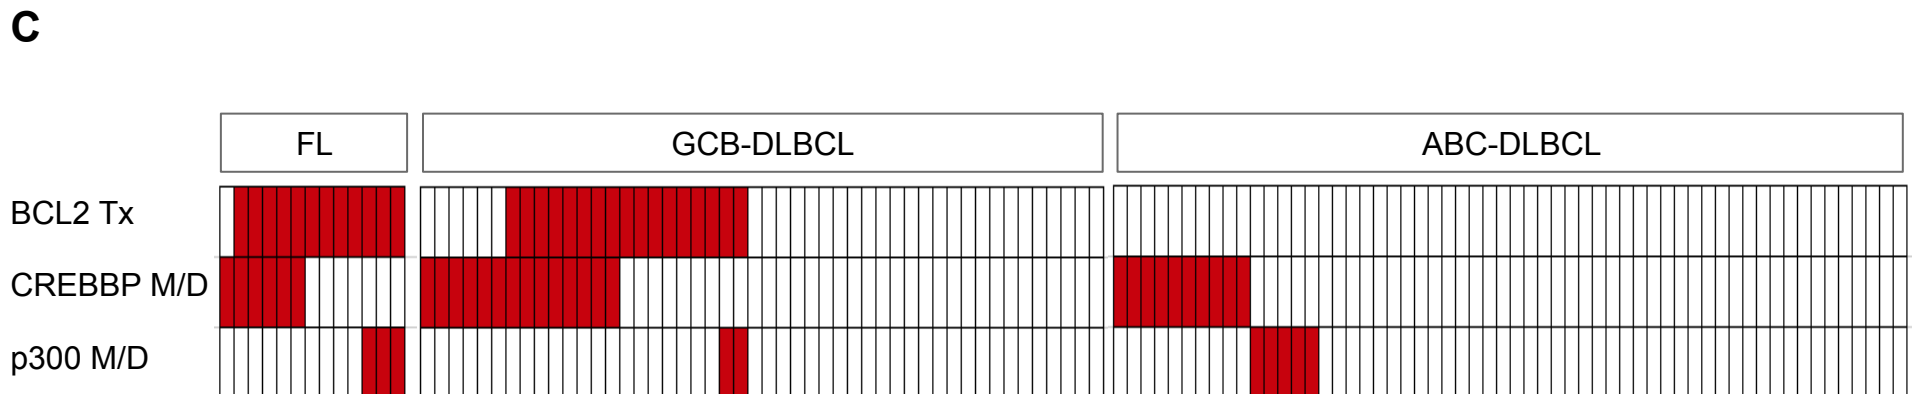

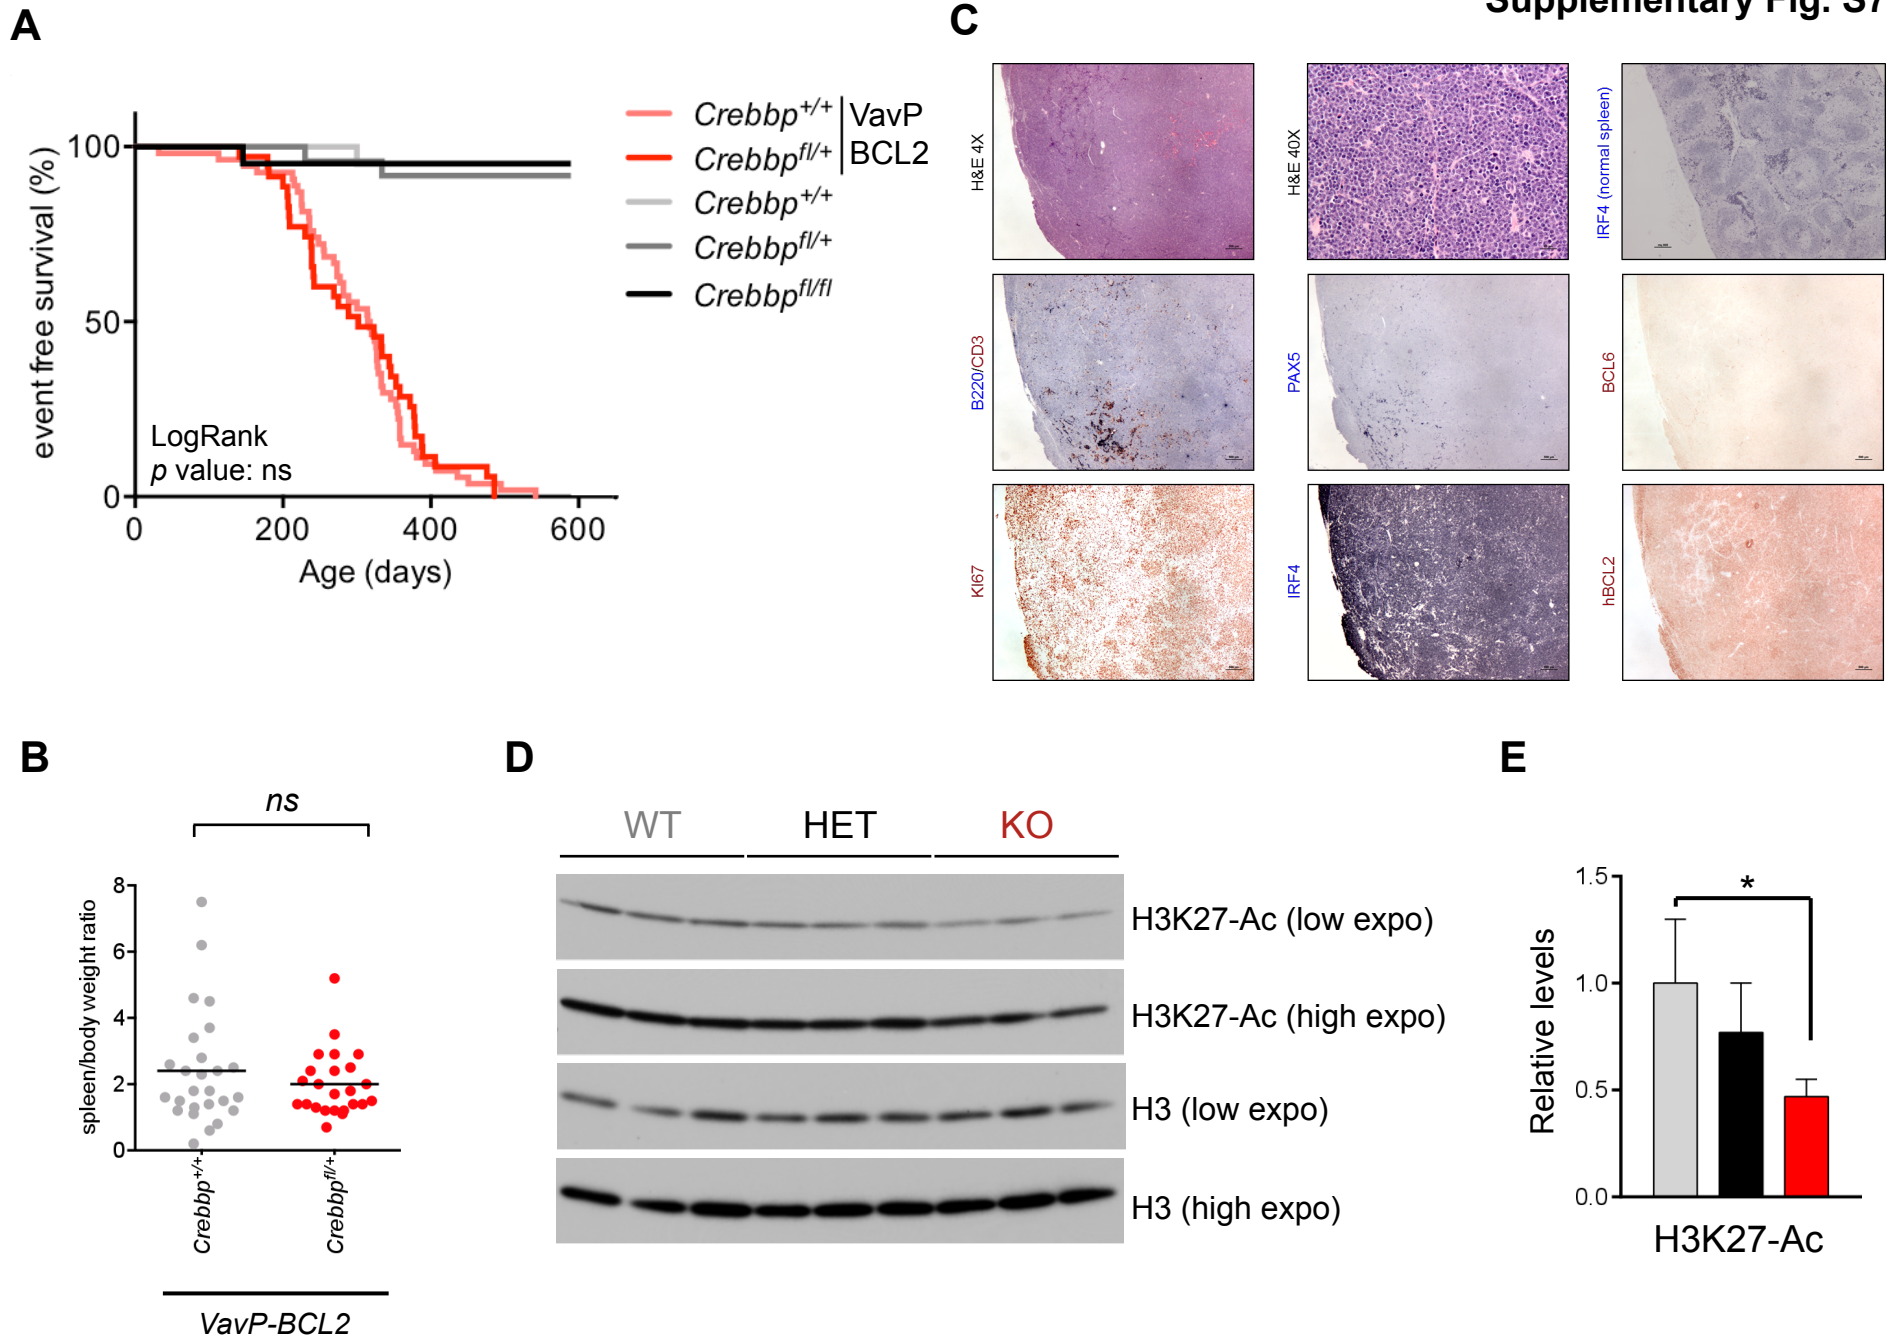

**Supplementary Table 1.** Overlap between CREBBP bound regions and predicted super-enhancers in GC B cells

| GC Superenhancer Region   | Region ID                  | Enhancer Size (bp) | Enhancer Rank | CREBBP-bound Region       | 1st Closest Gene Symbol | 1st Closest RefSeq | Distance from 1st closest TSS (in bp) | 2nd Closest Gene Symbol | 2nd Closest RefSeq | Distance from 2nd closest TSS (in bp) |
|---------------------------|----------------------------|--------------------|---------------|---------------------------|-------------------------|--------------------|---------------------------------------|-------------------------|--------------------|---------------------------------------|
| chr3:187634803-187701328  | 20_peak_19719_lociStitched | 47351              | 1             | chr3:187691675-187693050  | LPP                     | NM_001167672       | -203596                               | BCL6                    | NM_001706          | -204552                               |
| chr1:226814673-226929449  | 30_peak_13630_lociStitched | 56346              | 2             | chr1:226862618-226864562  | ITPKB                   | NM_002221          | 54815                                 | PSEN2                   | NM_000447          | -186212                               |
| chr16:81807830-81876383   | 20_peak_7781_lociStitched  | 43083              | 3             | chr16:81831859-81832992   | PLCG2                   | NM_002661          | 29243                                 | LOC100129617            | NR_045112          | 143147                                |
| chr9:37363349-37419965    | 16_peak_27441_lociStitched | 39821              | 4             | chr9:37370403-37372343    | GRHPR                   | NM_012203          | -31050                                | ZBTB5                   | NM_014872          | 73750                                 |
| chr12:122417604-122470895 | 13_peak_4039_lociStitched  | 29205              | 5             | chr12:122441961-122444912 | BCL7A                   | NM_020993          | -15612                                | MLXIP                   | NM_014938          | -72385                                |
| chr3:16452397-16564948    | 41_peak_18202_lociStitched | 44143              | 6             | chr3:16552918-16554677    | RFTN1                   | NM_015150          | 46550                                 | DAZL                    | NM_001190811       | 137625                                |
| chr11:65170627-65211670   | 4_peak_1865_lociStitched   | 22144              | 7             | chr11:65189405-65190492   | NEAT1                   | NR_028272          | 879                                   | FRMD8                   | NM_001300832       | 37107                                 |
| chr3:183229333-183311172  | 25_peak_19634_lociStitched | 37561              | 8             | chr3:183296109-183296953  | KLHL6                   | NM_130446          | 3247                                  | KLHL24                  | NM_017644          | -83159                                |
| chr1:198588311-198665343  | 22_peak_13245_lociStitched | 34995              | 9             | chr1:198589906-198591017  | PTPRC                   | NM_001267798       | 18729                                 | ATP6V1G3                | NM_133262          | -116752                               |
| chr3:186703597-186762622  | 12_peak_19701_lociStitched | 38237              | 10            | chr3:186733643-186734782  | ST6GAL1                 | NM_003032          | -6556                                 | RPL39L                  | NM_052969          | 124154                                |
| chr3:111827880-111856110  | 3_peak_19006_lociStitched  | 24965              | 11            | chr3:111832752-111833770  | GCSAM                   | NM_001190260       | 10157                                 | C3ORF52                 | NM_001171747       | 36813                                 |
| chr2:47915712-47993756    | 17_peak_16106_lociStitched | 34764              | 12            | chr2:47951262-47952115    | MSH6                    | NM_001281492       | -55487                                | FBXO11                  | NM_025133          | 161124                                |
| chr9:132747088-132808043  | 24_peak_28174_lociStitched | 37931              | 13            | chr9:132801722-132802217  | FNBP1                   | NM_015033          | 27908                                 | GPR107                  | NM_001287346       | -38420                                |
| chr1:31202836-31236056    | 4_peak_11613_lociStitched  | 21495              | 14            | chr1:31226216-31228630    | LAPTM5                  | NM_006762          | 11237                                 | MATN1                   | NM_002379          | -23014                                |
| chr1:40845266-40870377    | 3_peak_11814_lociStitched  | 22234              | 15            | chr1:40851238-40852025    | SMAP2                   | NM_001198979       | -1196                                 | ZFP69B                  | NM_023070          | -58516                                |
| chr1:203242441-203297285  | 13_peak_13307_lociStitched | 24469              | 16            | chr1:203258381-203259915  | LINC01136               | NR_034150          | 4590                                  | BTG2                    | NM_006763          | -4801                                 |
| chr4:40175036-40209614    | 7_peak_20272_lociStitched  | 22612              | 17            | chr4:40197933-40198760    | RHOH                    | NM_001278368       | -306                                  | LOC344967               | NR_027277          | -133506                               |
| chr17:5101124-5146940     | 14_peak_8088_lociStitched  | 23778              | 18            | chr17:5114047-5115091     | SCIMP                   | NM_207103          | 14123                                 | LOC100130950            | NR_034082          | 28653                                 |
| chr2:87767681-87825327    | 15_peak_16573_lociStitched | 27143              | 19            | chr2:87820268-87820984    | LINC00152               | NR_024206          | 41530                                 | PLGLB2                  | NM_002665          | -251102                               |
| chr6:24883450-24950062    | 11_peak_22914_lociStitched | 30778              | 20            | chr6:24935970-24936432    | FAM65B                  | NM_014722          | -5358                                 | GMNN                    | NM_001251991       | 141115                                |
| chr2:89127647-89169776    | 16_peak_16602_lociStitched | 32625              | 21            | chr2:89145265-89145824    | ANKRD36BP2              | NR_015424          | 83292                                 | RPIA                    | NM_144563          | 157535                                |
| chr14:22944123-23004250   | 20_peak_4917_lociStitched  | 37623              | 22            | chr14:22950216-22951021   | DAD1                    | NM_001344          | 83957                                 | ABHD4                   | NM_022060          | -92961                                |
| chr12:129267780-129315776 | 13_peak_4156_lociStitched  | 22518              | 23            | chr12:129280335-129281482 | SLC15A4                 | NM_145648          | 16763                                 | GLT1D1                  | NM_144669          | -46303                                |
| chr12:113487078-113536593 | 20_peak_3890_lociStitched  | 34067              | 24            | chr12:113524123-113525306 | DTX1                    | NM_004416          | 16173                                 | RASAL1                  | NM_001301202       | 61569                                 |
| chr9:36992298-37037830    | 10_peak_27404_lociStitched | 34028              | 25            | chr9:37036906-37037599    | PAX5                    | NM_001280550       | 19412                                 | EBLN3                   | NR_036592          | -64829                                |
| chr2:233924512-233966130  | 8_peak_17899_lociStitched  | 26101              | 26            | chr2:233946688-233947690  | INPP5D                  | NM_005541          | 20644                                 | NEU2                    | NM_005383          | 47939                                 |
| chr4:25858961-25882710    | 3_peak_20178_lociStitched  | 21244              | 27            | chr4:25879959-25881084    | SEL1L3                  | NM_001297592       | -5618                                 | SMIM20                  | NM_001145432       | -44979                                |
| chr5:124037564-124085364  | 14_peak_21931_lociStitched | 23091              | 28            | chr5:124079729-124080492  | ZNF608                  | NM_020747          | 19341                                 | CSNK1G3                 | NM_004384          | 1180353                               |
| chr12:25145988-25179348   | 8_peak_2933_lociStitched   | 21211              | 29            | chr12:25158279-25158777   | C12ORF77                | NM_001101339       | -12295                                | BCAT1                   | NM_001178092       | -60275                                |
| chr22:42315186-42337470   | 5_peak_15441_lociStitched  | 20228              | 30            | chr22:42315174-42318076   | TNFRSF13C               | NM_0052945         | -3507                                 | SHISA8                  | NM_001207020       | -15657                                |
| chr16:85921669-85951493   | 4_peak_7844_lociStitched   | 15667              | 31            | chr16:85941387-85942896   | IRF8                    | NM_002163          | 3807                                  | COX4I1                  | NM_001861          | 103408                                |
| chr6:90982711-91039522    | 14_peak_23684_lociStitched | 23869              | 32            | chr6:90995509-90996238    | BACH2                   | NM_001170794       | -4489                                 | MAP3K7                  | NM_145333          | 285904                                |
| chr19:10330587-10359549   | 5_peak_10104_lociStitched  | 20414              | 33            | chr19:10346603-10347459   | S1PR2                   | NM_004230          | -3120                                 | MRPL4                   | NM_015956          | -17572                                |
| chr3:72126090-72152127    | 3_peak_18876_lociStitched  | 19131              | 34            | chr3:72126675-72128315    | LINC00870               | NR_038221          | -61300                                | RYBP                    | NM_012234          | 356666                                |
| chr1:51955913-51984440    | 8_peak_11973_lociStitched  | 20994              | 35            | chr1:51982921-51984357    | EPS15                   | NM_001981          | 14819                                 | OSBPL9                  | NM_148908          | -112370                               |
| chr2:65581965-65649226    | 25_peak_16352_lociStitched | 29310              | 36            | chr2:65592188-65592972    | SPRED2                  | NM_001128210       | -21664                                | ACTR2                   | NM_005722          | 160766                                |
| chr17:62953421-62995667   | 9_peak_8929_lociStitched   | 19677              | 37            | chr17:62971032-62972320   | AMZP21                  | NR_026903          | -2841                                 | LRRC37A3                | NM_199340          | -59641                                |
| chr19:2060970-2096575     | 5_peak_9902_lociStitched   | 18067              | 38            | chr19:2086075-2088030     | MOB3A                   | NM_130807          | 17497                                 | IZUMO4                  | NM_001031735       | -18096                                |
| chr17:75435044-75470414   | 11_peak_9155_lociStitched  | 22274              | 39            | chr17:75436594-75438304   | SEPT9                   | NM_001293698       | 2654                                  | LOC100507351            | NR_040050          | -90294                                |
| chr5:158467004-158533819  | 15_peak_22417_lociStitched | 28054              | 40            | chr5:158479598-158480676  | EBF1                    | NM_182708          | 26377                                 | RNF145                  | NM_001199382       | 134245                                |
| chr20:49414797-49439114   | 6_peak_14384_lociStitched  | 18039              | 41            | chr20:49431651-49432683   | BCAS4                   | NM_001010974       | 15524                                 | PARD6B                  | NM_032521          | 78874                                 |
| chr5:150575564-150637765  | 14_peak_22289_lociStitched | 23886              | 42            | chr5:150590561-150592025  | CCDC69                  | NM_015621          | -3010                                 | GM2A                    | NM_000405          | -25949                                |
| chr13:74517881-74573984   | 15_peak_4663_lociStitched  | 22589              | 43            | chr13:74561669-74562284   | KLF12                   | NM_007249          | 162134                                | LINC00381               | NR_047005          | -447378                               |
| chr2:135007573-135053010  | 10_peak_17052_lociStitched | 20352              | 44            | chr2:135010908-135011797  | MGAT5                   | NM_002410          | 18461                                 | TMEM163                 | NM_030923          | 446280                                |
| chr11:64615389-64645020   | 12_peak_1828_lociStitched  | 24676              | 45            | chr11:64618493-64619818   | EHD1                    | NM_006795          | 16036                                 | CDC42BPG                | NM_017525          | -18163                                |
| chr6:159223905-159248388  | 5_peak_24256_lociStitched  | 16669              | 46            | chr6:159229853-159230354  | EZR-AS1                 | NR_102425          | -2865                                 | EZR                     | NM_003379          | 3194                                  |
| chr4:40290008-40319279    | 4_peak_20280_lociStitched  | 14128              | 47            | chr4:40307193-40308318    | CHRNA9                  | NM_017581          | -32703                                | RHOH                    | NM_004310          | 106116                                |
| chr16:10958561-10991465   | 5_peak_6957_lociStitched   | 25335              | 48            | chr16:10990004-10990932   | CIITA                   | NM_001286403       | 3958                                  | TVP23A                  | NM_001079512       | -62392                                |

|                           |                            |       |                              |            |              |                  |              |         |
|---------------------------|----------------------------|-------|------------------------------|------------|--------------|------------------|--------------|---------|
| chr3:133184525-133211509  | 7_peak_19242_lociStitched  | 18564 | 49 chr3:133185219-133187062  | BFSP2      | NM_003571    | 79178 CDV3       | NM_001134422 | -94417  |
| chr14:69252057-69302988   | 13_peak_5372_lociStitched  | 21360 | 50 chr14:69262149-69263303   | ZFP36L1    | NM_001244701 | -14562 ACTN1     | NM_001130005 | 168561  |
| chr17:37909853-37957242   | 15_peak_8521_lociStitched  | 19527 | 51 chr17:37911300-37913067   | IKZF3      | NM_001284516 | 931 GRB7         | NM_001242443 | 37327   |
| chr17:56405562-56422747   | 3_peak_8811_lociStitched   | 15160 | 52 chr17:56415822-56417181   | BZRAP1-AS1 | NR_038416    | -409 BZRAP1      | NM_024418    | -8002   |
| chr12:48197446-48231469   | 5_peak_3135_lociStitched   | 17831 | 53 chr12:48206556-48207871   | HDAC7      | NM_001098416 | -694 SLC48A1     | NM_017842    | 47490   |
| chr2:60563622-60599489    | 9_peak_16198_lociStitched  | 14774 | 54 chr2:60577801-60581599    | BCL11A     | NM_018014    | 199078 PAPOLG    | NM_022894    | -401810 |
| chr8:81050387-81083713    | 13_peak_26554_lociStitched | 20221 | 55 chr8:81082571-81083533    | TPD52      | NR_105037    | 16385 MRPS28     | NM_014018    | -124544 |
| chr6:159500969-159549089  | 6_peak_24271_lociStitched  | 13935 | 56 chr6:159527666-159528913  | TAGAP      | NM_138810    | -58845 RSPH3     | NM_031924    | -103831 |
| chr3:187802002-187827923  | 6_peak_19746_lociStitched  | 12400 | 57 chr3:187802725-187803499  | LPP        | NM_001167672 | -56699 LPP-AS2   | NR_036497    | 56914   |
| chr2:112182620-112239276  | 20_peak_16876_lociStitched | 23856 | 58 chr2:112210590-112211341  | BCL2L11    | NM_001204113 | 332457 ACOXL     | NM_001142807 | 720798  |
| chr10:11704426-11741760   | 10_peak_172_lociStitched   | 18712 | 59 chr10:11726139-11727540   | ECHDC3     | NM_024693    | -61263 PROSER2   | NM_153256    | -142304 |
| chr1:204449879-204493566  | 12_peak_13332_lociStitched | 16918 | 60 chr1:204463996-204464927  | PIK3C2B    | NM_002646    | -12248 MDM4      | NM_001204172 | -13785  |
| chr5:149778449-149799343  | 4_peak_22256_lociStitched  | 12636 | 61 chr5:149790313-149791448  | CD74       | NM_001025158 | 3603 RPS14       | NM_005617    | 40423   |
| chr8:27216935-27247989    | 6_peak_26080_lociStitched  | 21969 | 62 chr8:27223433-27224594    | PTK2B      | NM_173175    | 49381 TRIM35     | NM_171982    | -63628  |
| chr12:25203833-25224426   | 6_peak_2936_lociStitched   | 11382 | 63 chr12:25205283-25205710   | LRMP       | NM_001204127 | 8948 C12ORF77    | NM_001101339 | -63756  |
| chr14:107151109-107184536 | 9_peak_5859_lociStitched   | 13778 | 64 chr14:107169818-107170595 | LINC00221  | NR_027457    | 229377 LINC00226 | NR_033375    | 423553  |
| chr14:106025357-106053049 | 9_peak_5831_lociStitched   | 19199 | 65 chr14:106026281-106027311 | TMEM121    | NM_025268    | 46250 C14ORF80   | NM_001134876 | 81617   |
| chr3:58309520-58343311    | 9_peak_18743_lociStitched  | 20813 | 66 chr3:58335213-58336072    | PXK        | NM_001289101 | 7798 RPP14       | NR_049758    | 34443   |
| chr8:96142580-96193834    | 9_peak_26663_lociStitched  | 22067 | 67 chr8:96177280-96178272    | PLEKHF2    | NM_024613    | 22258 LINC01298  | NR_046232    | 60395   |
| chr19:35807438-35840817   | 9_peak_10537_lociStitched  | 16829 | 68 chr19:35814131-35815393   | CD22       | NM_001185101 | 4055 FFAR1       | NM_005303    | -18318  |
| chr3:31957712-32014356    | 22_peak_18386_lociStitched | 21986 | 69 chr3:31993456-31994217    | ZNF860     | NM_001137674 | -37232 OSBPL10   | NM_001174060 | 37308   |
| chr12:92528054-92567303   | 7_peak_3557_lociStitched   | 13898 | 70 chr12:92566051-92566919   | BTG1       | NM_001731    | -8005 C12ORF79   | NM_001256374 | -11231  |
| chr9:140599495-140657557  | 7_peak_28343_lociStitched  | 15232 | 71 chr9:140632699-140633237  | EHMT1-IT1  | NR_024341    | -28948 CACNA1B   | NM_001243812 | -143715 |
| chr14:94425211-94445807   | 7_peak_5647_lociStitched   | 16164 | 72 chr14:94442324-94443223   | ASB2       | NM_001202429 | 7567 LINC00521   | NR_024182    | -28107  |
| chr15:75066772-75091186   | 6_peak_6477_lociStitched   | 18702 | 73 chr15:75078758-75082823   | CSK        | NM_004383    | 4554 LMAN1L      | NM_021819    | -26215  |
| chr11:73683412-73723240   | 8_peak_2075_lociStitched   | 13970 | 74 chr11:73691022-73691792   | UCP2       | NM_003355    | -9437 UCP3       | NM_003356    | 16956   |
| chr20:36691582-36724631   | 9_peak_14163_lociStitched  | 17096 | 75 chr20:36692194-36692636   | RPRD1B     | NM_021215    | 46158 TTI1       | NM_014657    | -46273  |
| chr2:12171322-12198292    | 3_peak_15697_lociStitched  | 14557 | 76 chr2:12172091-12173031    | LPIN1      | NM_145693    | 298085 NTSR2     | NM_012344    | -374478 |
| chr5:66462229-66518485    | 11_peak_21503_lociStitched | 18917 | 77 chr5:66495755-66496871    | CD180      | NM_005582    | 2260 MAST4       | NM_001297651 | 189909  |
| chr9:93556149-93594120    | 12_peak_27683_lociStitched | 23787 | 78 chr9:93593070-93593770    | SYK        | NM_001174168 | 10925 DIRAS2     | NM_017594    | -170026 |
| chr7:102042681-102087360  | 12_peak_25376_lociStitched | 16703 | 79 chr7:102065186-102067350  | ORAI2      | NM_032831    | -8957 ALKBH4     | NM_017621    | 40301   |
| chr7:105689417-105731764  | 12_peak_25440_lociStitched | 21023 | 80 chr7:105698344-105699247  | SYPL1      | NM_182715    | 42201 CDHR3      | NM_001301161 | 106933  |
| chr5:118667396-118704022  | 11_peak_21874_lociStitched | 20778 | 81 chr5:118691650-118692359  | TNFAIP8    | NM_001286813 | -4759 HSD17B4    | NM_001199292 | -102429 |
| chr20:37468712-37522542   | 12_peak_14181_lociStitched | 20292 | 82 chr20:37503766-37504614   | FAM83D     | NM_030919    | -59328 DHX35     | NM_001190809 | -95354  |
| chr8:142089845-142135595  | 15_peak_27052_lociStitched | 19150 | 83 chr8:142128795-142130308  | DENND3     | NM_014957    | -26000 SLC45A4   | NM_001080431 | 125953  |
| chr15:89175886-89200676   | 7_peak_6670_lociStitched   | 15104 | 84 chr15:89184693-89185540   | ISG20      | NM_002201    | 6242 AEN         | NM_022767    | 23754   |
| chr14:106145679-106173203 | 7_peak_5841_lociStitched   | 20759 | 85 chr14:106146712-106147661 | ELK2AP     | NR_046211    | -20297 TMEM121   | NM_025268    | 166488  |
| chr22:23191814-23249826   | 16_peak_15039_lociStitched | 24017 | 86 chr22:23243646-23244564   | IGLL5      | NM_001256296 | -9140 GNAZ       | NM_002073    | -191849 |
| chr16:21367551-21392656   | 3_peak_7143_lociStitched   | 15145 | 87 chr16:21370888-21372011   | SNX29P1    | NR_045011    | 19419 CRYM       | NM_001888    | -65646  |
| chr14:68732869-68773164   | 7_peak_5343_lociStitched   | 16465 | 88 chr14:68751555-68752675   | RAD51B     | NM_002877    | 466520 ZFYVE26   | NM_015346    | -469710 |
| chr2:24538195-24583954    | 16_peak_15790_lociStitched | 19788 | 89 chr2:24577804-24578492    | ITSN2      | NM_019595    | 22323 FAM228A    | NM_001040710 | 163102  |
| chr13:46944351-46976440   | 7_peak_4533_lociStitched   | 17897 | 90 chr13:46951664-46952013   | KIAA0226L  | NM_001286762 | 1240 LINC00563   | NR_047493    | -88416  |
| chr12:125367945-125425284 | 11_peak_4118_lociStitched  | 15638 | 91 chr12:125401726-125402626 | UBC        | NM_021009    | 2973 SCARB1      | NM_001082959 | -48095  |
| chr4:74454282-74482405    | 8_peak_20437_lociStitched  | 14735 | 92 chr4:74472046-74473430    | RASSF6     | NM_001270391 | 17944 LOC728040  | NR_046377    | 93823   |
| chr5:139015094-139051524  | 11_peak_22154_lociStitched | 23293 | 93 chr5:139049373-139050437  | CXXC5      | NM_016463    | 5008 UBE2D2      | NM_003339    | 92558   |
| chr4:154387521-154420100  | 20_peak_20965_lociStitched | 22364 | 94 chr4:154387955-154388739  | KIAA0922   | NM_001131007 | 16312 MND1       | NM_001253861 | 138009  |
| chr15:81576567-81610140   | 5_peak_6586_lociStitched   | 17451 | 95 chr15:81586079-81586840   | IL16       | NM_004513    | 4099 STARD5      | NM_181900    | 23171   |
| chr2:33700527-33727174    | 9_peak_15915_lociStitched  | 19848 | 96 chr2:33719330-33719792    | RASGRP3    | NM_001139488 | 12529 FAM98A     | NM_015475    | 110512  |
| chr20:43207842-43247296   | 7_peak_14232_lociStitched  | 14307 | 97 chr20:43213466-43215534   | PKIG       | NM_001281445 | 16379 SERINC3    | NM_006811    | -76843  |
| chr7:55583219-55640001    | 12_peak_24976_lociStitched | 17304 | 98 chr7:55601935-55603344    | VOPP1      | NM_001284283 | -5250 FKBP9P1    | NR_027340    | 144115  |
| chr1:111735372-111765539  | 3_peak_12387_lociStitched  | 12373 | 99 chr1:111746220-111747435  | DENND2D    | NM_001271833 | -3295 CHI3L2     | NM_001025197 | -19826  |
| chr2:136863639-136875782  | 1_peak_17095_lociStitched  | 12144 | 100 chr2:136864109-136864765 | CXCR4      | NM_001008540 | 4103 DARS        | NM_001293312 | -126456 |
| chr6:149787102-149817038  | 8_peak_24103_lociStitched  | 18492 | 101 chr6:149802947-149805022 | ZC3H12D    | NM_207360    | 4078 PPIL4       | NM_139126    | 65168   |

|                           |                            |       |                               |           |              |                     |              |         |
|---------------------------|----------------------------|-------|-------------------------------|-----------|--------------|---------------------|--------------|---------|
| chr3:114146137-114180044  | 6_peak_19056_lociStitched  | 16899 | 102 chr3:114172851-114173286  | ZBTB20    | NM_001164342 | -60601 ZBTB20-AS1   | NR_038993    | 92432   |
| chr22:23270573-23296970   | 10_peak_15054_lociStitched | 16736 | 103 chr22:23281696-23282389   | IGLL5     | NM_001256296 | 53811 GNAZ          | NM_002073    | -128898 |
| chr2:68988839-69020565    | 7_peak_16420_lociStitched  | 18292 | 104 chr2:69014667-69015094    | ARHGAP25  | NM_001166276 | 2769 BMP10          | NM_014482    | 93947   |
| chr2:109191443-109249076  | 13_peak_16822_lociStitched | 15562 | 105 chr2:109225439-109226317  | LIMS1     | NM_001193482 | -3358 RANBP2        | NM_006267    | -115678 |
| chr9:114791040-114801063  | 2_peak_27869_lociStitched  | 9834  | 106 chr9:114793720-114794704  | UGCG      | NM_0033358   | 136845 C9ORF84      | NR_109816    | -238763 |
| chr10:126285921-126337415 | 17_peak_1186_lociStitched  | 20198 | 107 chr10:126307656-126308787 | FAM53B    | NM_014661    | 121262 METTL10      | NM_212554    | 168771  |
| chr3:5218295-5241211      | 7_peak_18039_lociStitched  | 19483 | 108 chr3:5223462-5223834      | EDEM1     | NM_014674    | 394 ARL8B           | NM_018184    | 65823   |
| chr11:128337837-128354581 | 5_peak_2576_lociStitched   | 14095 | 109 chr11:128340721-128341618 | ETS1      | NM_001162422 | 45996 FLI1          | NM_001271012 | -210221 |
| chr2:197015040-197048521  | 9_peak_17481_lociStitched  | 20203 | 110 chr2:197040786-197041287  | STK17B    | NM_004226    | 4556 DNAH7          | NM_018897    | -98244  |
| chr2:65240202-65260752    | 4_peak_16327_lociStitched  | 9982  | 111 chr2:65258209-65259116    | CEP68     | NM_015147    | -33018 SLC1A4       | NM_003038    | 33982   |
| chr11:65845185-65906352   | 12_peak_1907_lociStitched  | 18777 | 112 chr11:65894184-65894998   | PACS1     | NM_018026    | 37944 SF3B2         | NM_006842    | 55952   |
| chr14:96161924-96192712   | 10_peak_5899_lociStitched  | 15456 | 113 chr14:96162165-96163279   | TCL1A     | NM_001098725 | 3215 TCL1B          | NM_004918    | 24564   |
| chr3:36932246-36973258    | 11_peak_18455_lociStitched | 16428 | 114 chr3:36934487-36935086    | TRANK1    | NM_014831    | 33796 EPM2AIP1      | NM_014805    | 82043   |
| chr6:150941816-150968493  | 10_peak_24120_lociStitched | 15564 | 115 chr6:150952395-150953254  | PLEKHG1   | NM_001029884 | 34155 IYD           | NM_203395    | 265126  |
| chr9:100772585-100808325  | 12_peak_27771_lociStitched | 17220 | 116 chr9:100797600-100798227  | NANS      | NM_018946    | -28504 TRIM14       | NM_014788    | 91180   |
| chr14:70078807-70140642   | 11_peak_5385_lociStitched  | 14056 | 117 chr14:70080712-70081759   | KIAA0247  | NM_014734    | 31414 CCDC177       | NM_001271507 | -68124  |
| chr2:102314787-102340105  | 11_peak_16777_lociStitched | 18518 | 118 chr2:102332588-102333266  | MAP4K4    | NM_001242559 | 12908 RFX8          | NM_001145664 | -236281 |
| chr2:197993306-198023393  | 9_peak_17501_lociStitched  | 10366 | 119 chr2:198017093-198018164  | ANKRD44   | NM_001195144 | 167172 SF3B1        | NM_001005526 | 291422  |
| chr16:56945399-56985430   | 10_peak_7536_lociStitched  | 16613 | 120 chr16:56945700-56946273   | HERPUD1   | NM_001272103 | -588 CETP           | NM_001286085 | -30421  |
| chrX:1586063-1627330      | 13_peak_28352_lociStitched | 20283 | 121 chrX:1599556-1599983      | ASMTL     | NM_001173473 | -34041 ASMTL-AS1    | NR_026710    | 87272   |
| chr13:47152044-47200083   | 12_peak_4547_lociStitched  | 19364 | 122 chr13:47169142-47169901   | LRCH1     | NM_001164213 | 48767 KIAA0226L     | NM_001286761 | -211886 |
| chr8:37731469-37756145    | 11_peak_26173_lociStitched | 17514 | 123 chr8:37739239-37739906    | RAB11FIP1 | NM_025151    | 13208 GOT1L1        | NM_152413    | 53840   |
| chr11:14330381-14365238   | 17_peak_1445_lociStitched  | 16352 | 124 chr11:14333366-14334172   | RRAS2     | NM_001177315 | 32222 COPB1         | NM_016451    | 173595  |
| chr5:88115238-88146442    | 9_peak_21704_lociStitched  | 18352 | 125 chr5:88122764-88123533    | MEF2C     | NM_001193348 | -11096 LINC00461    | NR_015436    | -150220 |
| chr9:37322068-37341939    | 6_peak_27435_lociStitched  | 17874 | 126 chr9:37337479-37337921    | GRHPR     | NM_012203    | -90704 ZBTB5        | NM_014872    | 133404  |
| chr8:38792109-38823667    | 7_peak_26210_lociStitched  | 20038 | 127 chr8:38814373-38815564    | HTRA4     | NM_153692    | -23780 TM2D2        | NM_031940    | 46153   |
| chr15:59686988-59706438   | 4_peak_6245_lociStitched   | 11785 | 128 chr15:59704947-59706196   | MYO1E     | NM_004998    | -31642 FAM81A       | NM_152450    | -33659  |
| chr21:45562691-45581229   | 5_peak_14867_lociStitched  | 11349 | 129 chr21:45564817-45565897   | C21ORF33  | NM_198155    | 18466 PWP2          | NM_005049    | 44752   |
| chr4:164471844-164535211  | 21_peak_21023_lociStitched | 22066 | 130 chr4:164528058-164528626  | MARCH1    | NM_017923    | 31249 TMA16         | NM_018352    | 87854   |
| chr2:64312847-64341802    | 10_peak_16273_lociStitched | 14353 | 131 chr2:64313534-64314216    | PELI1     | NM_020651    | 44281 LINC00309     | NR_033837    | 105295  |
| chr5:71581257-71604294    | 7_peak_21577_lociStitched  | 16185 | 132 chr5:71586313-71586853    | MRPS27    | NM_001286751 | 23309 PTC2          | NR_001284403 | -23419  |
| chr2:175458060-175481033  | 7_peak_17359_lociStitched  | 14437 | 133 chr2:175458317-175458662  | WIPF1     | NM_003387    | 29761 CHRNA1        | NM_000079    | 159654  |
| chr16:27307382-27330398   | 3_peak_7255_lociStitched   | 11602 | 134 chr16:27309443-27309889   | IL4R      | NM_001257997 | -6340 NSMCE1        | NM_145080    | -38777  |
| chr2:131128019-131148899  | 7_peak_17027_lociStitched  | 16207 | 135 chr2:131134204-131134974  | PTPN18    | NM_001142370 | 24879 IMP4          | NM_033416    | 37970   |
| chr8:81997753-82024311    | 13_peak_26575_lociStitched | 21372 | 136 chr8:82009098-82009793    | PAG1      | NM_018440    | 13271 FABP5         | NM_001444    | -181686 |
| chr3:187953042-187962771  | 1_peak_19754_lociStitched  | 9730  | 137 chr3:187956796-187957646  | LPP       | NM_001167671 | 14713 FLJ42393      | NR_024413    | 61575   |
| chr5:1480005-1542714      | 16_peak_21183_lociStitched | 20601 | 138 chr5:1503564-1504484      | LPCAT1    | NM_024830    | 12717 SDHAP3        | NR_003263    | 83287   |
| chr19:7401181-7415329     | 3_peak_10051_lociStitched  | 9466  | 139 chr19:7409466-7410982     | ARHGEF18  | NM_015318    | -51744 LOC100128573 | NR_024491    | 129992  |
| chr1:14026957-14059928    | 6_peak_11249_lociStitched  | 10366 | 140 chr1:14057203-14057892    | PRDM2     | NM_012231    | 12092 PDPN          | NM_001006625 | 131475  |
| chr11:2400808-2421577     | 6_peak_1288_lociStitched   | 16172 | 141 chr11:2414650-2415346     | TSSC4     | NM_005706    | -10526 TRPM5        | NM_014555    | 33083   |
| chr13:41535487-41583277   | 12_peak_4457_lociStitched  | 15211 | 142 chr13:41579089-41579505   | ELF1      | NM_001145353 | -2964 SUGT1P3       | NR_003365    | -63472  |
| chr11:9615818-9638753     | 5_peak_1368_lociStitched   | 16113 | 143 chr11:9622492-9623437     | WEE1      | NM_001143976 | 31051 SWAP70        | NM_001297714 | -58339  |
| chr3:141087957-141131806  | 11_peak_19290_lociStitched | 14798 | 144 chr3:141098375-141098728  | ZBTB38    | NM_001080412 | 66826 PXYLP1        | NM_001037172 | 159214  |
| chr14:64326818-64338265   | 3_peak_5291_lociStitched   | 10875 | 145 chr14:64334808-64335569   | SYNE2     | NM_015180    | 12858 SGPP1         | NM_030791    | -137785 |
| chr13:46735071-46758668   | 4_peak_4527_lociStitched   | 19692 | 146 chr13:46750940-46751269   | LCP1      | NM_0022298   | 9590 CPB2           | NM_001278541 | -67658  |
| chr17:29635445-29648947   | 3_peak_8404_lociStitched   | 11944 | 147 chr17:29645225-29645797   | EVI2B     | NM_006495    | -1066 EVI2A         | NM_014210    | 6571    |
| chr8:8597953-8612466      | 3_peak_25917_lociStitched  | 10888 | 148 chr8:8610452-8611122      | CLDN23    | NM_194284    | 45543 MFHAS1        | NM_004225    | 145922  |
| chr9:134530040-134562267  | 5_peak_28219_lociStitched  | 15333 | 149 chr9:134531637-134532321  | RAPGEF1   | NM_198679    | 39076 UCK1          | NM_001135954 | -139491 |
| chr22:42253184-42285520   | 5_peak_15440_lociStitched  | 13091 | 150 chr22:42258131-42259078   | SREBF2    | NM_004599    | 40269 CCDC134       | NM_024821    | 72674   |
| chr15:86226033-86262437   | 10_peak_6651_lociStitched  | 15784 | 151 chr15:86250210-86250884   | AKAP13    | NM_001270546 | 81054 KLHL25        | NM_022480    | 93954   |
| chr17:76691101-76737073   | 23_peak_9205_lociStitched  | 20041 | 152 chr17:76735408-76736133   | CYTH1     | NM_001292019 | -973 USP36          | NM_025090    | 122882  |
| chr6:90059457-90070764    | 2_peak_23659_lociStitched  | 10780 | 153 chr6:90066988-90067507    | UBE2J1    | NM_016021    | -2491 GABRR2        | NM_002043    | -40092  |
| chr6:88614516-88636017    | 3_peak_23636_lociStitched  | 10466 | 154 chr6:88632453-88633007    | SPACA1    | NM_030960    | -132241 CNR1        | NM_033181    | 229790  |

|                           |                            |       |                               |              |              |                    |              |         |
|---------------------------|----------------------------|-------|-------------------------------|--------------|--------------|--------------------|--------------|---------|
| chr2:201980670-201995957  | 4_peak_17547_lociStitched  | 13468 | 155 chr2:201982899-201983889  | CFLAR        | NM_001127183 | 5044 CFLAR-AS1     | NR_040030    | 34202   |
| chr16:11387711-11406419   | 3_peak_6988_lociStitched   | 9556  | 156 chr16:11391113-11391996   | PRM1         | NM_002761    | -21873 PRM2        | NM_002762    | -26728  |
| chr10:63797650-63819566   | 7_peak_546_lociStitched    | 13846 | 157 chr10:63804981-63805415   | ARID5B       | NM_001244638 | -362 RTKN2         | NM_001282941 | 220014  |
| chr6:159275536-159291981  | 3_peak_24260_lociStitched  | 6422  | 158 chr6:159288362-159288850  | OSTCP1       | NR_028496    | -5094 C6ORF99      | NM_001195032 | -25861  |
| chr6:25006421-25056932    | 10_peak_22931_lociStitched | 19394 | 159 chr6:25006798-25007274    | FAM65B       | NM_001286446 | 10720 CMAHP        | NR_002174    | 106375  |
| chr11:82764059-82778911   | 5_peak_2163_lociStitched   | 10327 | 160 chr11:82774139-82775352   | RAB30        | NM_001286061 | 11019 RAB30-AS1    | NR_038903    | -11623  |
| chr8:27930739-27941935    | 2_peak_26093_lociStitched  | 9783  | 161 chr8:27936374-27937316    | NUGGC        | NM_001010906 | 5051 ELP3          | NM_001284222 | -11411  |
| chr9:139114445-139137403  | 4_peak_28280_lociStitched  | 12702 | 162 chr9:139117165-139117862  | QSOX2        | NM_181701    | 11763 LHX3         | NM_178138    | -28969  |
| chr16:21497466-21531619   | 7_peak_7153_lociStitched   | 13482 | 163 chr16:21528442-21529473   | SMG1P3       | NR_027155    | -940 SLC7A5P2      | NR_002594    | 17223   |
| chr14:74208606-74239905   | 7_peak_5442_lociStitched   | 16292 | 164 chr14:74220662-74221489   | ELMSAN1      | NM_194278    | 2746 PNMA1         | NM_006029    | -43127  |
| chr7:24860042-24887549    | 7_peak_24634_lociStitched  | 13455 | 165 chr7:24860774-24861335    | OSBPL3       | NM_145322    | 58445 DFNA5        | NM_001127454 | -76156  |
| chr7:50344228-50370594    | 3_peak_24950_lociStitched  | 16245 | 166 chr7:50347961-50348784    | IKZF1        | NM_001291840 | -1233 FIGNL1       | NM_001287495 | 160677  |
| chr16:29346939-29372208   | 7_peak_7319_lociStitched   | 12775 | 167 chr16:29357709-29358950   | SNX29P2      | NR_002939    | 45965 LOC606724    | NR_002454    | -101093 |
| chr20:52508974-52559263   | 17_peak_14477_lociStitched | 16957 | 168 chr20:52510227-52510804   | SUMO1P1      | NR_002189    | -41870 BCAS1       | NM_003657    | 153186  |
| chr15:94796166-94831668   | 6_peak_6759_lociStitched   | 11575 | 169 chr15:94801034-94802100   | MCTP2        | NM_001159643 | -27513 LOC440311   | NR_077061    | -584675 |
| chr5:14657324-14680889    | 6_peak_21263_lociStitched  | 17841 | 170 chr5:14663986-14664802    | OTULIN       | NM_138348    | 4323 LOC100130744  | NR_046285    | -43697  |
| chr16:9030155-9057158     | 9_peak_6927_lociStitched   | 15326 | 171 chr16:9055864-9056732     | USP7         | NM_001286457 | -13070 CARHSP1     | NM_014316    | -80787  |
| chr2:158292491-158301819  | 1_peak_17215_lociStitched  | 9329  | 172 chr2:158298174-158298580  | CYTIP        | NM_004288    | 3449 ERMN          | NM_001009959 | -113009 |
| chr11:103746189-103779193 | 8_peak_2304_lociStitched   | 13665 | 173 chr11:103767954-103769093 | DDI1         | NM_001001711 | -144617 PDGFD      | NM_025208    | 272336  |
| chr20:55963952-55976870   | 3_peak_14507_lociStitched  | 10424 | 174 chr20:55964756-55966035   | RBM38        | NM_183425    | 3957 MTRNR2L3      | NM_001190472 | -35533  |
| chr11:33912576-33944264   | 4_peak_1512_lociStitched   | 10853 | 175 chr11:33942703-33943513   | LMO2         | NM_005574    | -14584 FBXO3       | NM_012175    | -132349 |
| chr9:134594494-134611292  | 2_peak_28225_lociStitched  | 13072 | 176 chr9:134604775-134605581  | RAPGEF1      | NM_005312    | 10032 UCK1         | NM_001135954 | -196231 |
| chr3:151095550-151130520  | 16_peak_19388_lociStitched | 16781 | 177 chr3:151100393-151100911  | P2RY12       | NM_022788    | -10435 P2RY13      | NM_176894    | -65698  |
| chr20:56043130-56068750   | 5_peak_14513_lociStitched  | 14232 | 178 chr20:56043564-56044875   | CTCFI        | NM_001269041 | 43983 PCK1         | NM_002591    | -80197  |
| chrX:12965276-12998127    | 9_peak_28453_lociStitched  | 15990 | 179 chrX:12991425-12992181    | TMSB4X       | NM_021109    | -11525 TLR8-AS1    | NR_030727    | -20282  |
| chr2:234258108-234295011  | 7_peak_17918_lociStitched  | 15459 | 180 chr2:234288635-234289080  | DGKD         | NM_152879    | 13406 SAG          | NM_000541    | 60250   |
| chr9:37186780-37210173    | 7_peak_27421_lociStitched  | 11804 | 181 chr9:37196969-37197736    | ZCCHC7       | NM_001289120 | 77881 EBLN3        | NR_036592    | 118583  |
| chr12:96581567-96609103   | 7_peak_3667_lociStitched   | 19563 | 182 chr12:96602333-96603277   | ELK3         | NM_005230    | 7128 LTA4H         | NM_001256644 | -158037 |
| chr6:89309582-89351967    | 9_peak_23645_lociStitched  | 12495 | 183 chr6:89326014-89326316    | RNGTT        | NM_001286428 | 342574 PNRC1       | NM_006813    | -459655 |
| chr9:117126729-117160764  | 8_peak_27908_lociStitched  | 17291 | 184 chr9:117134816-117135772  | AKNA         | NM_030767    | 12939 ORM2         | NM_000608    | 51677   |
| chr11:60213886-60252037   | 9_peak_1698_lociStitched   | 14071 | 185 chr11:60222656-60223364   | MS4A1        | NM_021950    | 9679 MS4A5         | NM_023945    | 35899   |
| chr9:112872094-112911299  | 6_peak_27851_lociStitched  | 12911 | 186 chr9:112890941-112891576  | AKAP2        | NM_001136562 | 3915 C9ORF152      | NM_001012993 | 78717   |
| chr11:111268087-111292584 | 5_peak_2358_lociStitched   | 10272 | 187 chr11:111288325-111288958 | LOC100132078 | NR_046085    | 8576 POU2AF1       | NM_006235    | -30178  |
| chr6:14092005-14124816    | 4_peak_22799_lociStitched  | 14702 | 188 chr6:14108863-14110045    | CD83         | NM_001251901 | -9077 RNF182       | NM_001165033 | 182986  |
| chr6:32985456-32999764    | 2_peak_23178_lociStitched  | 7400  | 189 chr6:32995590-32996515    | HLA-DOA      | NM_002119    | -15221 BRD2        | NM_001199456 | 51749   |
| chr1:173373287-173400138  | 6_peak_13040_lociStitched  | 10790 | 190 chr1:173378728-173379637  | LOC100506023 | NR_037845    | 59582 PRDX6        | NM_004905    | -59774  |
| chr2:225382819-225393321  | 3_peak_17735_lociStitched  | 8631  | 191 chr2:225385960-225386429  | CUL3         | NM_001257198 | 46472 FAM124B      | NM_001122779 | -121359 |
| chr14:61930607-61946790   | 5_peak_5254_lociStitched   | 8555  | 192 chr14:61945528-61946151   | FLJ22447     | NR_039985    | -98560 HIF1A       | NM_181054    | -223421 |
| chr11:102415054-102434787 | 4_peak_2284_lociStitched   | 8655  | 193 chr11:102417044-102418272 | MMP7         | NM_002423    | -23442 TMEM123     | NM_052932    | -101145 |
| chr14:106322226-106331452 | 2_peak_5844_lociStitched   | 8926  | 194 chr14:106328777-106329329 | KIAA0125     | NR_026800    | -56999 ADAM6       | NR_002224    | 111519  |
| chr6:32907629-32916496    | peak_23167                 | 8868  | 195 chr6:32908653-32909719    | HLA-DMB      | NM_002118    | -3215 HLA-DMA      | NM_006120    | 8837    |
| chr8:11348658-11359633    | 2_peak_25975_lociStitched  | 10137 | 196 chr8:11349313-11351113    | BLK          | NM_001715    | 2624 FAM167A       | NM_053279    | -29869  |
| chr7:43685307-43693926    | 2_peak_24839_lociStitched  | 7305  | 197 chr7:43690840-43691575    | STK17A       | NM_004760    | 66924 LOC100506895 | NR_038276    | -127475 |
| chr21:45660992-45667873   | 2_peak_14877_lociStitched  | 6764  | 198 chr21:45663190-45664801   | ICOSLG       | NM_001283050 | -3545 DNMT3L       | NM_013369    | 17667   |
| chr6:132805591-132829992  | 8_peak_23912_lociStitched  | 14094 | 199 chr6:132816807-132817128  | STX7         | NM_003569    | 16546 TAAR8        | NM_053278    | -56041  |
| chr2:88894821-88918149    | 5_peak_16586_lociStitched  | 8578  | 200 chr2:88906208-88906563    | EIF2AK3      | NM_004836    | 20609 RPIA         | NM_144563    | -84691  |
| chr11:9738554-9778888     | 12_peak_1404_lociStitched  | 17204 | 201 chr11:9766718-9767414     | SBF2-AS1     | NR_036485    | -21119 LOC440028   | NR_033972    | 22359   |
| chr2:61648454-61692795    | 9_peak_16249_lociStitched  | 13796 | 202 chr2:61652006-61652656    | SNORA70B     | NR_003707    | -26112 USP34       | NM_014709    | 27225   |
| chr8:11388274-11416717    | 6_peak_25981_lociStitched  | 10986 | 203 chr8:11402940-11403845    | LINC00208    | NR_040035    | -31549 BLK         | NM_001715    | 50974   |
| chr9:37281087-37303324    | 10_peak_27430_lociStitched | 16930 | 204 chr9:37293697-37294531    | GRHPR        | NM_012203    | -130502 ZBTB5      | NM_014872    | 173202  |
| chr6:42738337-42752013    | 5_peak_23423_lociStitched  | 11936 | 205 chr6:42742577-42743195    | TBCC         | NM_003192    | -31291 ATP6V0CP3   | NR_037141    | 49861   |
| chr14:91810150-91841705   | 13_peak_5599_lociStitched  | 15773 | 206 chr14:91822425-91823152   | CCDC88C      | NM_001080414 | 58261 SMEK1        | NM_001284281 | 150897  |
| chr7:121009482-121027304  | 9_peak_25544_lociStitched  | 13228 | 207 chr7:121012774-121013070  | FAM3C        | NM_014888    | 18029 WNT16        | NM_057168    | 49303   |



|                           |                            |       |                               |              |              |                    |              |         |
|---------------------------|----------------------------|-------|-------------------------------|--------------|--------------|--------------------|--------------|---------|
| chr11:64897090-64928182   | 5_peak_1853_lociStitched   | 12484 | 208 chr11:64899701-64901112   | SYVN1        | NM_032431    | -10633 MRPL49      | NR_037568    | 22920   |
| chr16:3657328-3677162     | 3_peak_6894_lociStitched   | 9491  | 209 chr16:3673645-3674104     | SLX4         | NM_032444    | -5660 NLRC3        | NR_075083    | -39840  |
| chr12:110439794-110453000 | 4_peak_3800_lociStitched   | 10459 | 210 chr12:110443122-110443581 | ANKRD13A     | NM_033121    | 9162 GIT2          | NM_014776    | -12203  |
| chr9:6680614-6716384      | 7_peak_27221_lociStitched  | 10602 | 211 chr9:6682741-6683417      | KDM4C        | NM_001146696 | -22364 GLDC        | NM_000170    | -52807  |
| chr5:17253793-17283620    | 12_peak_21280_lociStitched | 16254 | 212 chr5:17282408-17283253    | BASP1        | NM_006317    | 51036 LOC285696    | NR_027253    | -51175  |
| chr11:118712445-118767515 | 14_peak_2465_lociStitched  | 17247 | 213 chr11:118741000-118741890 | CXCR5        | NM_001716    | -14495 BCL9L       | NM_182557    | 41633   |
| chr8:61820947-61840704    | 5_peak_26432_lociStitched  | 10621 | 214 chr8:61824099-61825106    | LOC100130298 | NR_034003    | 49482 CHD7         | NM_017780    | 239501  |
| chr2:45949490-45974373    | 7_peak_16047_lociStitched  | 9190  | 215 chr2:45956874-45957487    | PRKCE        | NM_005400    | 82888 SRBD1        | NM_018079    | -123498 |
| chr4:48193966-48215551    | 5_peak_20320_lociStitched  | 12832 | 216 chr4:48214239-48214536    | TEC          | NM_003215    | 67056 SLAIN2       | NM_020846    | -138855 |
| chr14:96125569-96134146   | 4_peak_5685_lociStitched   | 6744  | 217 chr14:96130576-96131177   | TCL6         | NR_028288    | 12342 TCL1B        | NM_004918    | -22897  |
| chrX:19857801-19903350    | 14_peak_28551_lociStitched | 19684 | 218 chrX:19881690-19882228    | SH3KBP1      | NM_031892    | 25169 CXORF23      | NM_198279    | 107807  |
| chr2:197124633-197141855  | 4_peak_17499_lociStitched  | 9512  | 219 chr2:197139137-197139811  | STK17B       | NM_004226    | -96908 DNAH7       | NM_018897    | -199708 |
| chr14:102280018-102316318 | 7_peak_5739_lociStitched   | 12519 | 220 chr14:102305508-102305998 | PPP2R5C      | NM_178586    | 22028 LINC00239    | NR_026774    | 101394  |
| chr19:16547014-16561698   | 7_peak_10292_lociStitched  | 9112  | 221 chr19:16554445-16555415   | EPS15L1      | NM_001258375 | 28467 CALR3        | NM_145046    | 52647   |
| chr1:150533566-150549923  | 6_peak_12617_lociStitched  | 15246 | 222 chr1:150533560-150536638  | MCL1         | NM_182763    | 10470 ADAMTSL4     | NM_019032    | 19899   |
| chr3:154811945-154832587  | 3_peak_19432_lociStitched  | 6400  | 223 chr3:154828775-154829739  | MME          | NM_007289    | 24187 LOC100507537 | NR_037902    | 189223  |
| chr9:130732431-130754481  | 7_peak_28112_lociStitched  | 14591 | 224 chr9:130733184-130733685  | FAM102A      | NM_001035254 | -644 DPM2          | NM_003863    | -42693  |
| chr8:103540325-103548856  | 2_peak_26751_lociStitched  | 8426  | 225 chr8:103546705-103547508  | ODF1         | NM_024410    | -19258 KLF10       | NR_103759    | 121602  |
| chr7:23402454-23414290    | 4_peak_24613_lociStitched  | 7417  | 226 chr7:23412677-23413435    | MALSU1       | NM_138446    | 69432 GPNMB        | NM_002510    | 122056  |
| chr9:92015468-92064277    | 13_peak_27646_lociStitched | 15199 | 227 chr9:92062877-92063635    | SEMA4D       | NM_001142287 | 54739 GADD45G      | NM_006705    | -180055 |
| chr16:23515930-23533233   | 4_peak_7198_lociStitched   | 10580 | 228 chr16:23529511-23530204   | GGA2         | NM_015044    | -2766 EARS2        | NM_001083614 | 44115   |
| chr5:140885376-140910337  | 3_peak_22182_lociStitched  | 12539 | 229 chr5:140886681-140889009  | PCDHGC5      | NM_018929    | 29048 PCDHGC4      | NM_018928    | 33115   |
| chr22:42928566-42948409   | 3_peak_15457_lociStitched  | 7064  | 230 chr22:42932941-42933489   | SERHL2       | NM_001284334 | -11381 RRP7B       | NR_002184    | 39530   |
| chr3:16407161-16428726    | 7_peak_18195_lociStitched  | 13610 | 231 chr3:16413893-16414730    | OXNAD1       | NM_138381    | 111276 DPH3        | NM_001047434 | -111447 |
| chr5:123980884-123997892  | 9_peak_21918_lociStitched  | 13200 | 232 chr5:123985153-123986290  | ZNF608       | NM_020747    | 91417 CSNK1G3      | NM_004384    | 1108277 |
| chr8:60922770-60971094    | 11_peak_26410_lociStitched | 13590 | 233 chr8:60938878-60939309    | CA8          | NM_004056    | 247022 RAB2A       | NM_001242644 | -482537 |
| chr2:46761853-46802452    | 9_peak_16065_lociStitched  | 13809 | 234 chr2:46796074-46797282    | RHOQ         | NM_012249    | 12285 ATP6V1E2     | NM_080653    | -35056  |
| chr2:9678250-9692740      | 5_peak_15647_lociStitched  | 10762 | 235 chr2:9691188-9691726      | ADAM17       | NM_003183    | 10422 YWHAQ        | NM_006826    | 85689   |
| chr21:43281945-43298913   | 7_peak_14791_lociStitched  | 10680 | 236 chr21:43284243-43284855   | PRDM15       | NR_104260    | -7018 C2CD2        | NM_199050    | 56370   |
| chr8:59956084-59998204    | 12_peak_26377_lociStitched | 15271 | 237 chr8:59988483-59989060    | TOX          | NM_014729    | 54623 NSMAF        | NM_003580    | -404740 |
| chr13:27795682-27805506   | 3_peak_4258_lociStitched   | 8975  | 238 chr13:27803874-27804566   | RPL21        | NM_000982    | -25098 SNORD102    | NR_002574    | -28607  |
| chr11:9687692-9723875     | 24_peak_1385_lociStitched  | 16285 | 239 chr11:9714287-9714727     | SWAP70       | NM_001297714 | 20159 WEE1         | NM_001143976 | 109549  |
| chr19:55762913-55788992   | 5_peak_11004_lociStitched  | 10485 | 240 chr19:55765158-55765961   | PPP6R1       | NM_014931    | -5914 HSPBP1       | NM_001297600 | 15273   |
| chr10:121459529-121469541 | 3_peak_1140_lociStitched   | 8887  | 241 chr10:121464147-121464403 | INPP5F       | NM_001243195 | -21024 BAG3        | NM_004281    | 53653   |
| chr1:9472821-9489431      | 8_peak_11191_lociStitched  | 12130 | 242 chr1:9485751-9487161      | SLC25A33     | NM_032315    | -118402 TMEM201    | NM_001010866 | -167806 |
| chr7:50180575-50191877    | 3_peak_24941_lociStitched  | 10380 | 243 chr7:50185407-50185970    | C7ORF72      | NM_001161834 | 50544 ZPBP         | NM_007009    | -53366  |
| chr1:87495833-87530773    | 9_peak_12180_lociStitched  | 11501 | 244 chr1:87523141-87523817    | LINC01140    | NR_026988    | -82145 LMO4        | NM_006769    | -280848 |
| chr7:150061289-150080894  | 4_peak_25786_lociStitched  | 10940 | 245 chr7:150074235-150074663  | REPIN1       | NM_014374    | 2833 RNU6-34P      | NR_046492    | 7055    |
| chr19:50834914-50861792   | 6_peak_10940_lociStitched  | 11987 | 246 chr19:50847891-50848578   | NAPSB        | NR_002798    | -348 KCNC3         | NR_110912    | -11581  |
| chr6:41975062-42014173    | 11_peak_23389_lociStitched | 14174 | 247 chr6:41992846-41993725    | CCND3        | NM_001136126 | 22015 TAF8         | NM_138572    | -23634  |
| chr3:197496694-197520977  | 4_peak_19908_lociStitched  | 10348 | 248 chr3:197500682-197501058  | LRCH3        | NM_032773    | -9310 FYTTD1       | NR_027840    | 31574   |
| chr15:101459875-101483281 | 9_peak_6787_lociStitched   | 13460 | 249 chr15:101467007-101467967 | LRRK1        | NM_024652    | 12118 ALDH1A3      | NM_001293815 | 51681   |
| chr6:167501882-167543528  | 8_peak_24321_lociStitched  | 14453 | 250 chr6:167526416-167527204  | CCR6         | NM_004367    | -2590 GPR31        | NM_005299    | 48614   |
| chr6:91078759-91103088    | 8_peak_23700_lociStitched  | 7610  | 251 chr6:91085165-91086093    | BACH2        | NM_001170794 | -84296 MAP3K7      | NM_145333    | 206097  |
| chr3:150456975-150484962  | 7_peak_19366_lociStitched  | 13368 | 252 chr3:150483991-150484597  | SIAH2        | NM_005067    | 10295 ERICH6       | NM_152394    | -49226  |
| chr1:36837357-36867132    | 7_peak_11747_lociStitched  | 10695 | 253 chr1:36855632-36856604    | STK40        | NM_001282547 | -716 LSM10         | NM_032881    | 11249   |
| chr9:124703978-124709314  | 1_peak_27991_lociStitched  | 5337  | 254 chr9:124705508-124706200  | TLL11        | NM_001139442 | 149239 NDUF8       | NM_014222    | 215452  |
| chr17:18938780-18947829   | 1_peak_8275_lociStitched   | 9050  | 255 chr17:18941085-18942692   | GRAP         | NM_006613    | 7032 FAM83G        | NM_001039999 | -35244  |
| chr15:52969777-52976768   | 1_peak_6169_lociStitched   | 6992  | 256 chr15:52970248-52970632   | FAM214A      | NM_019600    | -2441 ONECUT1      | NR_073510    | 99809   |
| chr17:30816611-30851947   | 10_peak_8423_lociStitched  | 12669 | 257 chr17:30818890-30819507   | CDK5R1       | NM_003885    | 20174 PSMD11       | NM_001270482 | 62798   |
| chr20:17938755-17951415   | peak_13958                 | 12661 | 258 chr20:17949293-17949885   | SNORD17      | NR_003045    | -1496 SNX5         | NM_014426    | 4352    |
| chr9:71252012-71260430    | 2_peak_27548_lociStitched  | 7545  | 259 chr9:71254794-71256035    | PIP5K1B      | NM_001278253 | -64109 FAM122A     | NM_138333    | -138743 |
| chr1:26610682-26618242    | 2_peak_11474_lociStitched  | 6780  | 260 chr1:26614867-26616553    | SH3BGR13     | NM_031286    | 8249 CEP85         | NM_001281518 | 18688   |

|                           |                            |       |                               |           |              |                     |              |          |
|---------------------------|----------------------------|-------|-------------------------------|-----------|--------------|---------------------|--------------|----------|
| chr1:24233153-24243459    | 5_peak_11409_lociStitched  | 9192  | 261 chr1:24235141-24236199    | CNR2      | NM_001841    | 1511 FUCA1          | NM_000147    | -43447   |
| chr17:57904812-57926175   | 6_peak_8849_lociStitched   | 15996 | 262 chr17:57923215-57923540   | TUBD1     | NM_001193613 | 54813 RPS6KB1       | NM_001272042 | -54914   |
| chr2:96808249-96830770    | 7_peak_16649_lociStitched  | 11883 | 263 chr2:96811241-96812592    | DUSP2     | NM_004418    | -8330 ASTL          | NM_001002036 | -15334   |
| chr12:15101471-15115958   | 3_peak_2884_lociStitched   | 13543 | 264 chr12:15114044-15114688   | ARHGDI1B  | NM_001175    | 5848 PDE6H          | NM_006205    | -17242   |
| chr9:35616892-35647630    | 9_peak_27353_lociStitched  | 9240  | 265 chr9:35618210-35620235    | CD72      | NM_001782    | -13837 TESK1        | NM_006285    | 26980    |
| chr7:86841988-86849862    | 2_peak_25208_lociStitched  | 7625  | 266 chr7:86848097-86849888    | TMEM243   | NM_024315    | 3106 DMTF1          | NM_021145    | 64055    |
| chr11:117850343-117883179 | 7_peak_2416_lociStitched   | 9677  | 267 chr11:117881193-117882264 | IL10RA    | NM_001558    | 9655 TMPRSS13       | NM_001206789 | -66593   |
| chr1:32773776-32800838    | 6_peak_11680_lociStitched  | 11309 | 268 chr1:32782141-32782976    | MARCKSL1  | NM_023009    | 14533 FAM229A       | NM_001167676 | 40537    |
| chr1:160590828-160655847  | 20_peak_12903_lociStitched | 16331 | 269 chr1:160616442-160617137  | SLAMF1    | NR_104400    | -6236 CD48          | NM_001256030 | 58304    |
| chr8:67521808-67528173    | 2_peak_26482_lociStitched  | 6252  | 270 chr8:67525460-67526957    | MYBL1     | NM_001144755 | 494 VCIPI1          | NM_025054    | 54462    |
| chr2:232526602-232545638  | 7_peak_17871_lociStitched  | 9553  | 271 chr2:232536033-232537954  | PTMA      | NM_001099285 | -37115 PDE6D        | NM_001291018 | 109917   |
| chr1:192594436-192609269  | 3_peak_13203_lociStitched  | 14222 | 272 chr1:192595653-192596032  | RGS13     | NM_144766    | -3416 RGS1          | NM_002922    | 56995    |
| chr12:117238514-117257508 | 5_peak_3931_lociStitched   | 9695  | 273 chr12:117240850-117242214 | HRK       | NM_003806    | 71221 FBXW8         | NM_153348    | -100750  |
| chr11:65260414-65275352   | 7_peak_1873_lociStitched   | 9202  | 274 chr11:65264811-65265053   | MALAT1    | NR_002819    | 2650 SCYL1          | NM_020680    | -24665   |
| chr17:19033343-19042300   | 1_peak_8287_lociStitched   | 8958  | 275 chr17:19038493-19040006   | GRAPL     | NM_001129778 | 7039 GRAP           | NM_006613    | -87485   |
| chr12:9860239-9894814     | 17_peak_2796_lociStitched  | 16001 | 276 chr12:9874342-9874660     | CLECL1    | NM_001267701 | 8369 CD69           | NM_001781    | 35971    |
| chr19:49829041-49851623   | 5_peak_10887_lociStitched  | 10430 | 277 chr19:49836937-49837903   | CD37      | NM_001774    | 1655 SLC6A16        | NM_014037    | -11858   |
| chr22:50624976-50631837   | 1_peak_15550_lociStitched  | 6862  | 278 chr22:50628772-50630268   | TRABD     | NM_025204    | 4046 SELO           | NM_031454    | -11002   |
| chr19:1251063-1266978     | 3_peak_9866_lociStitched   | 10576 | 279 chr19:1261390-1262068     | CIRBP     | NM_001300815 | -10245 CIRBP-AS1    | NR_027271    | 11239    |
| chr2:61192340-61223143    | 7_peak_16239_lociStitched  | 12211 | 280 chr2:61198550-61199067    | PEX13     | NM_002618    | -37071 PUS10        | NM_144709    | 37624    |
| chr19:19262013-19281030   | 9_peak_10423_lociStitched  | 16142 | 281 chr19:19271073-19272019   | MEF2B     | NM_001145785 | 9577 RFXANK         | NM_134440    | -31487   |
| chr6:10528351-10540793    | 2_peak_22731_lociStitched  | 9336  | 282 chr6:10533705-10534661    | GCNT2     | NM_145649    | 13004 LINC00518     | NR_027793    | -99517   |
| chr1:9122746-9142770      | 4_peak_11183_lociStitched  | 9639  | 283 chr1:9129581-9130124      | SLC2A5    | NM_001135585 | -2871 SLC2A7        | NM_207420    | -46354   |
| chr1:226531932-226559871  | 6_peak_13602_lociStitched  | 12849 | 284 chr1:226543248-226544244  | LIN9      | NM_001270410 | -48452 MIXL1        | NM_031944    | 134582   |
| chr17:61992710-62009697   | 6_peak_8902_lociStitched   | 10354 | 285 chr17:62004741-62005963   | GH1       | NM_022560    | -4991 CSHL1         | NM_022580    | -12585   |
| chr12:95730690-95760459   | 9_peak_3636_lociStitched   | 11534 | 286 chr12:95737243-95737897   | METAP2    | NM_006838    | -122248 USP44       | NR_125360    | 182528   |
| chr10:98030683-98053110   | 3_peak_907_lociStitched    | 9351  | 287 chr10:98047123-98047831   | BLNK      | NM_001114094 | -10563 DNNT         | NM_004088    | -22189   |
| chr11:128479688-128500927 | 4_peak_2589_lociStitched   | 8155  | 288 chr11:128494158-128494914 | ETS1      | NM_001143820 | -32854 FLI1         | NM_001271012 | -66123   |
| chr12:32415417-32427134   | 2_peak_3038_lociStitched   | 7910  | 289 chr12:32418784-32419248   | BICD1     | NM_001003398 | 161090 RNU6-78P     | NR_046944    | -274473  |
| chr6:106959976-106973613  | 4_peak_23737_lociStitched  | 10377 | 290 chr6:106967745-106968215  | AIM1      | NM_001624    | 7064 RTN4IP1        | NM_032730    | 110579   |
| chr3:187455274-187468756  | 2_peak_19716_lociStitched  | 13253 | 291 chr3:187461327-187462007  | BCL6      | NM_001706    | 1498 RTP2           | NM_001004312 | -41670   |
| chr17:73315678-73348527   | 7_peak_9085_lociStitched   | 11631 | 292 chr17:73315986-73316655   | SLC25A19  | NM_001126122 | -46572 LOC100287042 | NR_036520    | 64722    |
| chr1:32714891-32731164    | 3_peak_11674_lociStitched  | 9792  | 293 chr1:32715445-32716148    | LCK       | NM_005356    | 6187 FAM167B        | NM_032648    | 10209    |
| chr10:104401725-104412971 | 3_peak_1024_lociStitched   | 9394  | 294 chr10:104405069-104406546 | TRIM8     | NM_030912    | 3096 ARL3           | NM_004311    | 66842    |
| chr8:119289974-119296105  | 1_peak_26826_lociStitched  | 6132  | 295 chr8:119294142-119294546  | EXT1      | NM_000127    | -168981 SAMD12-AS1  | NR_038210    | -340201  |
| chr16:86018272-86045649   | 7_peak_7852_lociStitched   | 10123 | 296 chr16:86028381-86029870   | IRF8      | NM_002163    | 99186 COX4I1        | NM_001861    | 198787   |
| chr7:18537281-18573446    | 18_peak_24530_lociStitched | 16579 | 297 chr7:18570137-18570404    | HDAC9     | NM_001204147 | 6463 PRPS1L1        | NM_175886    | -487877  |
| chr22:47163367-47173608   | 2_peak_15521_lociStitched  | 8912  | 298 chr22:47169144-47170973   | TBC1D22A  | NM_001284305 | -1337 CERK          | NM_022766    | -34335   |
| chr6:134520220-134569874  | 7_peak_23938_lociStitched  | 11593 | 299 chr6:134568170-134568899  | SGK1      | NM_001143677 | -46037 HMGA1P7      | NR_037938    | -106229  |
| chr3:188467765-188474760  | 1_peak_19790_lociStitched  | 6996  | 300 chr3:188470519-188471395  | TPRG1     | NM_198485    | -418501 TPRG1-AS2   | NR_046722    | 487121   |
| chr14:105122519-105129168 | 1_peak_5807_lociStitched   | 6650  | 301 chr14:105124063-105125562 | INF2      | NM_001031714 | -30100 ADSSL1       | NM_152328    | -64691   |
| chr5:156912640-156937472  | 6_peak_22344_lociStitched  | 11656 | 302 chr5:156928940-156930026  | NIPAL4    | NM_001172292 | 38029 FNDC9         | NM_001001343 | -152327  |
| chr4:153581619-153597347  | 2_peak_20946_lociStitched  | 8460  | 303 chr4:153584241-153584781  | TMEM154   | NM_152680    | 11834 TIGD4         | NM_145720    | 111433   |
| chr13:41143809-41172636   | 11_peak_4417_lociStitched  | 9818  | 304 chr13:41163672-41164186   | FOXO1     | NM_002015    | 82512 MRPS31        | NM_005830    | 187125   |
| chr2:135493502-135499091  | 1_peak_17065_lociStitched  | 5590  | 305 chr2:135494658-135495621  | TMEM163   | NM_030923    | -19725 ACMSD        | NM_138326    | -99890   |
| chr16:30450492-30485143   | 5_peak_7412_lociStitched   | 9508  | 306 chr16:30483733-30484203   | SEPHS2    | NM_012248    | -10521 DCTPP1       | NM_024096    | -26444   |
| chr10:5687252-5708390     | 3_peak_61_lociStitched     | 13132 | 307 chr10:5699045-5699721     | ASB13     | NR_024581    | 10737 FAM208B       | NM_017782    | -28980   |
| chr7:40845549-40852696    | 1_peak_24811_lociStitched  | 7148  | 308 chr7:40849788-40850320    | SUGCT     | NM_001193312 | 674547 MPLKIP       | NM_138701    | -674871  |
| chr2:146444309-146454677  | 4_peak_17158_lociStitched  | 8803  | 309 chr2:146445143-146445980  | PABPC1P2  | NR_026904    | -895132 ACVR2A      | NM_001278580 | -2152593 |
| chr20:46039925-46046299   | 1_peak_14289_lociStitched  | 6375  | 310 chr20:46045353-46045756   | ZMYND8    | NM_001281769 | -57479 LOC100131496 | NR_024594    | 95866    |
| chr4:185304482-185339285  | 5_peak_21122_lociStitched  | 9759  | 311 chr4:185304984-185305919  | LOC728175 | NR_040108    | -46753 IRF2         | NM_002199    | 73843    |
| chr3:30640416-30700286    | 20_peak_18357_lociStitched | 16059 | 312 chr3:30684300-30684781    | TGFBR2    | NM_003242    | 22357 GADL1         | NM_207359    | 265802   |
| chr19:16694620-16705814   | 4_peak_10302_lociStitched  | 6252  | 313 chr19:16698123-16698892   | SLC35E1   | NM_024881    | -17024 CHERP        | NM_006387    | -46954   |

|                           |                            |       |                               |            |              |                     |              |         |
|---------------------------|----------------------------|-------|-------------------------------|------------|--------------|---------------------|--------------|---------|
| chr10:81003439-81027040   | 5_peak_735_lociStitched    | 11008 | 314 chr10:81008055-81008591   | PPIF       | NM_005729    | -91981 ZCCHC24      | NM_153367    | 190144  |
| chr2:11886967-11896314    | 3_peak_15680_lociStitched  | 8547  | 315 chr2:11889870-11891261    | LPIN1      | NM_145693    | 4918 NTSR2          | NM_012344    | -81311  |
| chrX:13092168-13111401    | 4_peak_28467_lociStitched  | 16524 | 316 chrX:13092668-13093353    | FAM9C      | NM_174901    | -38867 TMSB4X       | NM_021109    | 108558  |
| chr10:98454981-98469104   | 6_peak_925_lociStitched    | 11463 | 317 chr10:98460357-98460888   | PIK3AP1    | NM_152309    | 18237 LCOR          | NM_001170765 | -129975 |
| chr12:65004369-65038375   | 7_peak_3379_lociStitched   | 11877 | 318 chr12:65004510-65004975   | RASSF3     | NR_040718    | 17079 GNS           | NM_002076    | 131854  |
| chr7:104572836-104592209  | 5_peak_25409_lociStitched  | 8524  | 319 chr7:104584010-104586072  | LHFPL3-AS2 | NR_027374    | -15430 LINC01004    | NR_039981    | 49090   |
| chr4:39354734-39368579    | 5_peak_20245_lociStitched  | 11949 | 320 chr4:39358569-39359014    | RFC1       | NM_001204747 | 6345 KLB            | NM_175737    | -46817  |
| chr15:100042165-100056117 | 5_peak_6772_lociStitched   | 10206 | 321 chr15:100051936-100052991 | MEF2A      | NM_001130927 | -56992 LYSMD4       | NM_001284418 | 224449  |
| chr7:22386285-22428262    | 11_peak_24580_lociStitched | 12739 | 322 chr7:22403545-22404064    | RAPGEF5    | NM_012294    | -10740 STEAP1B      | NM_001164460 | 132628  |
| chr9:123631441-123668926  | 7_peak_27964_lociStitched  | 11212 | 323 chr9:123654640-123655366  | PHF19      | NM_001286840 | 6991 TRAF1          | NM_001190947 | 26667   |
| chr17:75137455-75143918   | 1_peak_9146_lociStitched   | 6464  | 324 chr17:75140159-75140782   | SEC14L1    | NM_001143999 | 3681 SCARNA16       | NR_003013    | 55297   |
| chr11:44617600-44634879   | 4_peak_1564_lociStitched   | 11673 | 325 chr11:44630212-44631576   | CD82       | NM_001024844 | 39098 TSPAN18       | NM_130783    | -159737 |
| chr14:89762801-89777160   | 4_peak_5548_lociStitched   | 6927  | 326 chr14:89773858-89774416   | FOXN3      | NM_005197    | 113474 FOXN3-AS1    | NR_036500    | -113718 |
| chr1:167582160-167606880  | 6_peak_12969_lociStitched  | 9212  | 327 chr1:167586459-167587393  | RCS1       | NM_052862    | -4954 CREG1         | NM_003851    | -71464  |
| chr11:67034434-67056431   | 5_peak_1942_lociStitched   | 12102 | 328 chr11:67044798-67045325   | ANKRD13D   | NM_207354    | -11330 SSH3         | NM_017857    | -25487  |
| chr4:164583600-164588956  | 1_peak_21040_lociStitched  | 5357  | 329 chr4:164584997-164585500  | MARCH1     | NM_017923    | -51502 TMA16        | NM_018352    | 170605  |
| chr10:5881924-5915897     | 6_peak_86_lociStitched     | 7667  | 330 chr10:5886176-5886982     | FBXO18     | NM_001258452 | -32625 ANKRD16      | NM_001009943 | 32950   |
| chr22:46165244-46181600   | 4_peak_15498_lociStitched  | 8210  | 331 chr22:46173654-46174007   | ATXN10     | NM_001167621 | 105744 FBLN1        | NM_001996    | 274703  |
| chr11:121237611-121301894 | 13_peak_2499_lociStitched  | 13435 | 332 chr11:121243721-121244145 | SORL1      | NM_003105    | -53160 SC5D         | NM_001024956 | 106175  |
| chr6:143234346-143269532  | 6_peak_24040_lociStitched  | 10972 | 333 chr6:143267431-143268500  | HIVEP2     | NM_006734    | 14399 LINC01277     | NR_038987    | 106780  |
| chr16:84619592-84643891   | 9_peak_7810_lociStitched   | 11925 | 334 chr16:84633162-84633721   | COTL1      | NM_021149    | 19961 KLHL36        | NM_024731    | -50390  |
| chr9:123683752-123707240  | 9_peak_27968_lociStitched  | 13646 | 335 chr9:123698157-123699055  | TRAF1      | NM_001190945 | -4045 PHF19         | NM_001286840 | -38322  |
| chr12:47600436-47617729   | 5_peak_3109_lociStitched   | 8837  | 336 chr12:47609346-47610476   | PCED1B-AS1 | NR_026544    | 1144 AMIGO2         | NM_001143668 | -135348 |
| chr19:42612892-42635107   | 8_peak_10711_lociStitched  | 10983 | 337 chr19:42618192-42618953   | POU2F2     | NM_001207026 | 12626 LOC100505622  | NR_038332    | -12782  |
| chr10:14686783-14716105   | 5_peak_222_lociStitched    | 9166  | 338 chr10:14701507-14702127   | FAM107B    | NM_001282697 | -55027 CDFN         | NM_001029954 | 178539  |
| chr12:739310-795529       | 17_peak_2649_lociStitched  | 10947 | 339 chr12:783056-783562       | NINJ2      | NM_016533    | 5488 WNK1           | NM_014823    | -94670  |
| chr2:64863374-64894890    | 7_peak_16299_lociStitched  | 13022 | 340 chr2:64871616-64872031    | SERTAD2    | NM_014755    | 1914 LOC339807      | NR_034023    | 44686   |
| chr10:126222758-126239523 | 7_peak_1178_lociStitched   | 12158 | 341 chr10:126228097-126228918 | LHPP       | NM_001167880 | 80799 NKX1-2        | NM_001146340 | -92590  |
| chr15:59529210-59557831   | 6_peak_6223_lociStitched   | 10975 | 343 chr15:59556877-59557237   | LDHAL6B    | NM_033195    | 44505 CCNB2         | NM_004701    | 146236  |
| chr2:136888904-136895060  | 1_peak_17097_lociStitched  | 6157  | 344 chr2:136893420-136894125  | CXCR4      | NM_003467    | -16257 DARS         | NM_001293312 | -148728 |
| chr17:65564730-65583962   | 4_peak_8986_lociStitched   | 10475 | 345 chr17:65570774-65571278   | NOL11      | NM_015462    | -139715 SNORA38B    | NR_003706    | -162440 |
| chr5:180229962-180260365  | 5_peak_22604_lociStitched  | 11012 | 346 chr5:180230069-180231148  | MGAT1      | NM_001114617 | -8026 LINC00847     | NR_027183    | -12794  |
| chr16:70437958-70469037   | 7_peak_7668_lociStitched   | 7168  | 347 chr16:70463833-70466136   | ST3GAL2    | NM_006927    | 19494 FUK           | NM_145059    | -35001  |
| chr4:42629289-42648932    | 5_peak_20296_lociStitched  | 13541 | 348 chr4:42640936-42641327    | ATP8A1     | NM_001105529 | 20012 GRXCR1        | NM_001080476 | -256173 |
| chr8:126613708-126623687  | 3_peak_26892_lociStitched  | 8494  | 349 chr8:126618429-126618869  | TRIB1      | NM_001282985 | 174246 NSMCE2       | NM_173685    | 514614  |
| chr7:101922098-101951493  | 3_peak_25366_lociStitched  | 10871 | 350 chr7:101932026-101932978  | SH2B2      | NM_020979    | 8442 SPDYE6         | NM_001146210 | 60094   |
| chr6:37511953-37531120    | 6_peak_23323_lociStitched  | 12385 | 351 chr6:37512151-37512825    | CCDC167    | NM_138493    | -53836 CMTR1        | NM_015050    | 120629  |
| chr12:7045417-7071047     | 6_peak_2738_lociStitched   | 12121 | 352 chr12:7061989-7063468     | PTPN6      | NM_002831    | -2202 C12ORF57      | NM_001301837 | 5252    |
| chr9:140542138-140586493  | 9_peak_28328_lociStitched  | 12533 | 353 chr9:140544381-140545308  | EHMT1      | NM_001145527 | 50871 ARDC1-AS1     | NR_122035    | -50968  |
| chr16:27408574-27420435   | 2_peak_7261_lociStitched   | 11554 | 354 chr16:27410225-27410934   | IL21R      | NM_181078    | 1021 IL21R-AS1      | NR_037158    | 50210   |
| chr7:101497100-101528986  | 14_peak_25350_lociStitched | 14108 | 355 chr7:101499650-101500496  | CUX1       | NM_181552    | 52161 MYL10         | NM_138403    | -240467 |
| chr10:65016327-65034022   | 5_peak_582_lociStitched    | 9491  | 356 chr10:65020631-65020993   | JMJD1C     | NM_001282948 | 3809 NRBF2          | NM_001282405 | 132167  |
| chr1:32388641-32410437    | 6_peak_11649_lociStitched  | 14996 | 357 chr1:32394310-32394660    | PTP4A2     | NM_080391    | 4449 KHDRBS1        | NM_001271878 | -79756  |
| chr22:40794427-40813254   | 3_peak_15384_lociStitched  | 9236  | 358 chr22:40810702-40811831   | SGSM3      | NM_001301849 | 37274 ADSL          | NM_001123378 | 61336   |
| chr4:114484286-114496354  | 4_peak_20764_lociStitched  | 8535  | 359 chr4:114485523-114486741  | CAMK2D     | NM_172115    | 192763 ARSJ         | NM_024590    | 410558  |
| chr14:50426285-50444820   | 3_peak_5109_lociStitched   | 8687  | 360 chr14:50429232-50429734   | C14ORF182  | NM_001012706 | 38686 LOC100506499  | NR_102736    | 71050   |
| chr15:52513057-52528547   | 4_peak_6163_lociStitched   | 6573  | 361 chr15:52526802-52527754   | GNB5       | NM_016194    | -37237 LOC100129973 | NR_102751    | 48579   |
| chr10:126406585-126432497 | 13_peak_1216_lociStitched  | 13603 | 362 chr10:126430087-126430801 | FAM53B     | NM_014661    | 13389 METTL10       | NM_212554    | 60898   |
| chr19:2610500-2633350     | 7_peak_9933_lociStitched   | 9541  | 363 chr19:2610711-2611449     | GNG7       | NM_052847    | 80821 DIRAS1        | NM_145173    | 99465   |
| chr11:108093583-108108587 | 3_peak_2334_lociStitched   | 7203  | 364 chr11:108096040-108096370 | ATM        | NM_000051    | 7526 NPAT           | NM_002519    | -7720   |
| chr3:53196101-53227285    | 10_peak_18698_lociStitched | 16163 | 365 chr3:53206144-53206699    | PRKCD      | NM_212539    | 16470 RFT1          | NM_052859    | -47223  |
| chr6:41672258-41701996    | 13_peak_23359_lociStitched | 12105 | 366 chr6:41673468-41675149    | TFEB       | NM_001271945 | 15012 PGC           | NM_001166424 | 28012   |
| chr1:156450958-156475859  | 8_peak_12782_lociStitched  | 10564 | 367 chr1:156462193-156462876  | MEF2D      | NM_001271629 | -3017 C1ORF61       | NM_006365    | -64224  |

|                           |                            |       |                               |           |              |                     |              |          |
|---------------------------|----------------------------|-------|-------------------------------|-----------|--------------|---------------------|--------------|----------|
| chr8:101504946-101514682  | 5_peak_26715_lociStitched  | 7155  | 368 chr8:101512234-101513344  | ANKRD46   | NM_001270378 | 62125 SNX31         | NM_152628    | 152079   |
| chr17:63009158-63047178   | 15_peak_8946_lociStitched  | 15011 | 369 chr17:63031965-63032099   | GNA13     | NM_001282425 | 23724 AMZ2P1        | NR_026903    | -56465   |
| chr12:9799341-9804879     | 1_peak_2786_lociStitched   | 5539  | 370 chr12:9800295-9802670     | LOC374443 | NR_046447    | 1467 CLEC2D         | NM_001197319 | -20194   |
| chr2:65132116-65146162    | 2_peak_16318_lociStitched  | 5821  | 371 chr2:65142335-65145249    | LOC400958 | NR_036586    | 20442 SLC1A4        | NM_001193493 | -76440   |
| chr1:174125987-174138677  | 4_peak_13060_lociStitched  | 10503 | 372 chr1:174128288-174129305  | RABGAP1L  | NM_014857    | 3780 RC3H1          | NM_001300850 | -170122  |
| chr11:95421953-95450770   | 7_peak_2241_lociStitched   | 8039  | 373 chr11:95448797-95449372   | FAM76B    | NM_144664    | 86593 CEP57         | NM_001243777 | -87264   |
| chr14:23018532-23039293   | 9_peak_4937_lociStitched   | 12959 | 374 chr14:23030638-23031332   | DAD1      | NM_001344    | 29231 ABHD4         | NM_022060    | -38235   |
| chr20:5625633-5640195     | 8_peak_13911_lociStitched  | 7064  | 375 chr20:5626120-5626598     | GPCPD1    | NM_019593    | -41242 LINC00654    | NR_015406    | -147672  |
| chr1:94148553-94182707    | 11_peak_12274_lociStitched | 14254 | 376 chr1:94173514-94173844    | BCAR3     | NM_003567    | -18236 LOC100129046 | NR_034091    | 108105   |
| chr14:59820395-59830526   | 5_peak_5230_lociStitched   | 7632  | 377 chr14:59823458-59823880   | DAAM1     | NM_014992    | 95301 GPR135        | NM_022571    | 106599   |
| chr13:31182289-31202130   | 4_peak_4335_lociStitched   | 9247  | 378 chr13:31191074-31191311   | USPL1     | NM_005800    | 379 ALOX5AP         | NM_001204406 | -95406   |
| chr1:111400797-111423329  | 6_peak_12376_lociStitched  | 8731  | 379 chr1:111414800-111415333  | CD53      | NM_001040033 | -1758 LRF1          | NM_001006945 | 94503    |
| chr8:110582896-110612216  | 7_peak_26797_lociStitched  | 13052 | 380 chr8:110586791-110587336  | EBAG9     | NM_001278938 | 44701 SYBU          | NM_001099756 | 57863    |
| chr3:128994593-129002452  | 1_peak_19200_lociStitched  | 7860  | 381 chr3:129001314-129001950  | HMCES     | NM_001006109 | 705 COG1            | NM_016128    | 30069    |
| chr16:89032102-89059792   | 8_peak_7909_lociStitched   | 13619 | 383 chr16:89049303-89050759   | CBFA2T3   | NM_005187    | -2443 PABPN1L       | NM_001294328 | -112879  |
| chr8:23278500-23284427    | 1_peak_26047_lociStitched  | 5928  | 384 chr8:23282736-23283649    | LOXL2     | NM_002318    | -19741 ENTPD4       | NM_001128930 | 33781    |
| chr6:139644512-139651035  | 2_peak_24017_lociStitched  | 4625  | 385 chr6:139646319-139647187  | TXLNB     | NM_153235    | -34565 CITED2       | NM_001168389 | 47577    |
| chr7:47708657-47713078    | 1_peak_24926_lociStitched  | 4422  | 386 chr7:47709144-47710216    | C7ORF65   | NM_001123065 | 16025 TNS3          | NM_022748    | -89125   |
| chr11:118269125-118291072 | 5_peak_2434_lociStitched   | 11061 | 387 chr11:118277343-118277790 | ATP5L     | NM_006476    | 7994 LOC100131626   | NR_046370    | 9432     |
| chr3:113931510-113942817  | 3_peak_19046_lociStitched  | 5864  | 388 chr3:113932486-113933430  | DRD3      | NM_001282563 | -18909 ZNF80        | NM_007136    | 19262    |
| chr16:67581106-67601095   | 5_peak_7591_lociStitched   | 9678  | 389 chr16:67580923-67582531   | CTCF      | NM_001191022 | -5210 FAM65A        | NM_001193524 | 19735    |
| chr8:22298581-22314348    | 4_peak_26021_lociStitched  | 9508  | 390 chr8:22301179-22301597    | PPP3CC    | NM_001243975 | 7981 SLC39A14       | NM_001135153 | 81414    |
| chr11:128418522-128434811 | 5_peak_2584_lociStitched   | 6542  | 391 chr11:128421456-128422271 | ETS1      | NM_001143820 | 30787 FLI1          | NM_001271012 | -129764  |
| chr5:133264236-133275282  | 3_peak_22061_lociStitched  | 9848  | 392 chr5:133269445-133270349  | C5ORF15   | NM_020199    | 34647 VDAC1         | NR_036625    | 70898    |
| chr13:31873136-31897243   | 6_peak_4357_lociStitched   | 6364  | 393 chr13:31894821-31895442   | B3GALTL   | NM_194318    | 111077 HSPH1        | NM_001286505 | -148664  |
| chr12:69014600-69035369   | 5_peak_3432_lociStitched   | 14821 | 394 chr12:69024339-69024788   | SNORA70G  | NR_033335    | -3829 RAP1B         | NM_001251918 | 20365    |
| chr9:100860505-100884150  | 5_peak_27778_lociStitched  | 10901 | 395 chr9:100870790-100871212  | TRIM14    | NM_014788    | 9308 CORO2A         | NM_003389    | 62847    |
| chr1:157674486-157705234  | 8_peak_12815_lociStitched  | 10260 | 396 chr1:157694792-157695309  | FCRL3     | NM_052939    | -19213 FCRL2        | NR_125358    | 57062    |
| chr6:155003109-155011785  | 2_peak_24163_lociStitched  | 6351  | 397 chr6:155005269-155005620  | SCAF8     | NM_014892    | -47065 CNKSR3       | NM_173515    | -175694  |
| chr17:65807338-65817706   | 5_peak_8992_lociStitched   | 7344  | 398 chr17:65809290-65809854   | BPTF      | NM_182641    | -9258 SNORA38B      | NR_003706    | 75736    |
| chr15:98689156-98708879   | 3_peak_6770_lociStitched   | 8966  | 399 chr15:98690630-98691157   | ARRDC4    | NM_183376    | 195084 LINC00923    | NR_024173    | -281358  |
| chr3:188404210-188419495  | 3_peak_19787_lociStitched  | 11682 | 400 chr3:188414923-188415331  | LPP       | NM_001167671 | 468659 FUJ42393     | NR_024413    | 515521   |
| chr19:10704032-10715963   | 2_peak_10117_lociStitched  | 4246  | 401 chr19:10714565-10715697   | SLC44A2   | NM_001145056 | -3124 AP1M2         | NM_005498    | -12006   |
| chr8:135610278-135615163  | 2_peak_27016_lociStitched  | 4563  | 402 chr8:135613745-135614502  | ZFAT-AS1  | NR_002438    | 2406 ZFAT           | NM_001174158 | 96081    |
| chr10:5729298-5759217     | 14_peak_74_lociStitched    | 10858 | 403 chr10:5736600-5736937     | FAM208B   | NM_017782    | 17456 ASB13         | NR_024581    | -35699   |
| chr1:38616808-38621155    | 1_peak_11775_lociStitched  | 4348  | 404 chr1:38617760-38618958    | LINC01343 | NR_038928    | 61458 POU3F1        | NM_002699    | -106531  |
| chr18:21058318-21092666   | 9_peak_9447_lociStitched   | 9960  | 405 chr18:21059725-21060241   | C18ORF8   | NR_075075    | -7942 RIOK3         | NM_003831    | 42705    |
| chr13:30902496-30929443   | 8_peak_4308_lociStitched   | 8094  | 406 chr13:30906882-30907638   | LINC00426 | NR_024464    | 32082 KATNAL1       | NM_032116    | -34345   |
| chr2:146499278-146510651  | 4_peak_17162_lociStitched  | 6920  | 407 chr2:146508898-146509600  | PABPC1P2  | NR_026904    | -839661 ACVR2A      | NM_001278580 | -2097122 |
| chr21:34733500-34756843   | 5_peak_14713_lociStitched  | 7084  | 408 chr21:34755342-34756337   | IFNGR2    | NM_005534    | -30031 TMEM50B      | NM_006134    | 107145   |
| chr6:34623580-34649371    | 5_peak_23244_lociStitched  | 7396  | 409 chr6:34642820-34643004    | C6ORF106  | NM_022758    | 28152 SNRPC         | NR_029472    | -88396   |
| chr20:30937267-30957380   | 12_peak_14038_lociStitched | 13405 | 410 chr20:30946763-30947354   | ASXL1     | NM_001164603 | 1176 KIF3B          | NM_004798    | 81869    |
| chr10:94471501-94518670   | 6_peak_871_lociStitched    | 7770  | 411 chr10:94516087-94517594   | HHEX      | NM_002729    | 45404 KIF11         | NM_004523    | 142260   |
| chrX:10065326-10090435    | 8_peak_28431_lociStitched  | 12437 | 412 chrX:10079038-10080074    | CLCN4     | NM_001256944 | -47105 WWC3         | NM_015691    | 94085    |
| chr11:121316031-121339204 | 6_peak_25153_lociStitched  | 14061 | 413 chr11:121337163-121337875 | SORL1     | NM_003105    | 4705 SC5D           | NM_001024956 | 164040   |
| chr12:111084939-111118712 | 9_peak_3834_lociStitched   | 10344 | 414 chr12:111106409-111108404 | HVCN1     | NM_032369    | 25137 PPP1CC        | NM_002710    | 78958    |
| chr19:16251786-16260895   | 5_peak_10277_lociStitched  | 8492  | 415 chr19:16252005-16252386   | HSH2D     | NR_111903    | 11502 RAB8A         | NM_005370    | 33850    |
| chr21:40685608-40702660   | 2_peak_14778_lociStitched  | 6929  | 416 chr21:40689908-40690823   | BRWD1-AS1 | NR_046655    | 6501 BRWD1          | NM_001007246 | -8422    |
| chr15:74666388-74697443   | 6_peak_6460_lociStitched   | 10659 | 417 chr15:74695164-74697055   | CYP11A1   | NM_000781    | -21834 LOC729739    | NR_045207    | 28022    |
| chr8:56752375-56758342    | 2_peak_26321_lociStitched  | 4676  | 418 chr8:56757074-56757391    | LYN       | NM_002350    | -37028 TMEM68       | NM_001286660 | -69392   |
| chr4:154346663-154361921  | 3_peak_20957_lociStitched  | 7104  | 419 chr4:154354212-154355233  | KIAA0922  | NM_001131007 | -33206 MND1         | NM_001253861 | 88491    |
| chr17:76142887-76170686   | 7_peak_9183_lociStitched   | 8287  | 420 chr17:76143435-76144105   | SYNGR2    | NM_004710    | -7885 TK1           | NM_003258    | 26499    |
| chr20:4792024-4797274     | 1_peak_13878_lociStitched  | 5251  | 421 chr20:4793104-4795827     | RASSF2    | NM_170774    | 1120 PRNT           | NR_024268    | -73335   |

|                           |                           |       |                               |           |              |                     |              |         |
|---------------------------|---------------------------|-------|-------------------------------|-----------|--------------|---------------------|--------------|---------|
| chr8:56835595-56852910    | 8_peak_26335_lociStitched | 10184 | 422 chr8:56852182-56852585    | LYN       | NM_002350    | 51866 TMEM68        | NM_001286660 | -158286 |
| chr4:146950646-146983696  | 6_peak_20904_lociStitched | 10304 | 423 chr4:146980265-146981499  | LINC01095 | NR_038331    | 75894 LSM6          | NM_007080    | -129664 |
| chr9:126959431-126981740  | 8_peak_28041_lociStitched | 8698  | 424 chr9:126978879-126981406  | NEK6      | NM_001166167 | -49300 LOC100129034 | NR_027406    | -145167 |
| chr18:51736065-51750549   | 4_peak_9635_lociStitched  | 8191  | 425 chr18:51749747-51750065   | SNORA37   | NR_002970    | 5475 MBD2           | NM_003927    | 7851    |
| chr4:299824-324189        | 6_peak_19937_lociStitched | 8808  | 426 chr4:303100-304041        | ZNF141    | NM_003441    | -19590 ZNF732       | NM_001137608 | -22062  |
| chr12:14425925-14444546   | 8_peak_2861_lociStitched  | 8351  | 428 chr12:14436278-14436754   | ATF7IP    | NM_001286515 | -83331 PLBD1        | NM_024829    | 285556  |
| chr11:72857958-72869360   | 5_peak_2056_lociStitched  | 6441  | 429 chr11:72863170-72864606   | FCHSD2    | NM_014824    | -10516 P2RY2        | NM_176072    | -65684  |
| chr8:28195307-28206815    | 2_peak_26106_lociStitched | 5496  | 430 chr8:28195824-28197092    | PNOC      | NM_001284244 | 4896 ZNF395         | NM_018660    | 42916   |
| chr14:95953508-95986884   | 10_peak_5669_lociStitched | 12824 | 431 chr14:95961875-95962308   | SYNE3     | NM_152592    | -28023 SNHG10       | NR_003138    | 31013   |
| chr10:98426747-98442433   | 8_peak_919_lociStitched   | 10791 | 432 chr10:98433053-98434026   | PIK3AP1   | NM_152309    | 45689 LCOR          | NM_001170765 | -157427 |
| chr14:94927154-94951929   | 4_peak_5656_lociStitched  | 9862  | 433 chr14:94942366-94943022   | SERPINA9  | NM_175739    | 3129 SERPINA11      | NM_001080451 | -20419  |
| chr16:87731431-87764065   | 10_peak_7869_lociStitched | 8561  | 434 chr16:87734446-87736518   | KLHDC4    | NM_001184854 | 51850 SLC7A5        | NM_003486    | 155352  |
| chr2:98546607-98554054    | 3_peak_16708_lociStitched | 6807  | 435 chr2:98552716-98553085    | TMEM131   | NM_015348    | 62024 VWA3B         | NM_144992    | -153265 |
| chr5:100224643-100240645  | 2_peak_21785_lociStitched | 9084  | 436 chr5:100237413-100238200  | ST8SIA4   | NM_005668    | 6345 FAM174A        | NM_198507    | 361520  |
| chr1:24513975-24530982    | 2_peak_11425_lociStitched | 6036  | 437 chr1:24515794-24517906    | LOC284632 | NR_027087    | -4252 IFNLR1        | NM_173065    | -8713   |
| chr17:73290556-73294841   | 1_peak_9081_lociStitched  | 4286  | 438 chr17:73291226-73292243   | SLC25A19  | NM_001126122 | -7168 LOC100287042  | NR_036520    | 25318   |
| chr2:33750598-33757231    | 2_peak_15923_lociStitched | 6414  | 440 chr2:33755635-33756601    | RASGRP3   | NM_015376    | 14972 FAM98A        | NM_015475    | 70448   |
| chr2:137133950-137155637  | 5_peak_17106_lociStitched | 10736 | 441 chr2:137152018-137152526  | CXCR4     | NM_003467    | -269068 DARS        | NM_001293312 | -401539 |
| chr16:11444627-11465633   | 7_peak_6992_lociStitched  | 6909  | 442 chr16:11455469-11456248   | RMI2      | NM_152308    | 15819 PRM1          | NM_002761    | -79938  |
| chr9:88952002-88969237    | 6_peak_27632_lociStitched | 9128  | 443 chr9:88965351-88965596    | ZCCHC6    | NM_001185074 | 8783 ISCA1          | NM_030940    | -63129  |
| chr6:26155685-26173688    | 4_peak_22957_lociStitched | 7715  | 444 chr6:26157362-26158149    | HIST1H2BD | NM_021063    | 6337 HIST1H1E       | NM_005321    | 8127    |
| chr22:18476363-18489038   | 7_peak_14944_lociStitched | 9180  | 445 chr22:18487917-18488523   | MICAL3    | NM_015241    | 24625 FLJ41941      | NR_024417    | -29451  |
| chr1:25059675-25076314    | 8_peak_11437_lociStitched | 8038  | 446 chr1:25074784-25075671    | CLIC4     | NM_013943    | -3766 SRRM1         | NM_005839    | 98400   |
| chr22:26929764-26933338   | 1_peak_15136_lociStitched | 3575  | 447 chr22:26931402-26931797   | TFIP11    | NM_012143    | -23114 SRRD         | NM_001013694 | 51701   |
| chr15:80254250-80275180   | 6_peak_6559_lociStitched  | 10272 | 448 chr15:80269781-80270587   | BCL2A1    | NM_004049    | -1072 ST20          | NR_037653    | -48619  |
| chr11:130021108-130052264 | 7_peak_2616_lociStitched  | 7480  | 449 chr11:130035838-130036760 | ST14      | NM_021978    | 7004 APLP2          | NM_001243299 | 96223   |
| chr11:61121569-61130181   | 2_peak_1728_lociStitched  | 7191  | 450 chr11:61124098-61125271   | CYB561A3  | NM_001161452 | -1514 TMEM138       | NM_016464    | -3598   |
| chr11:64529661-64551037   | 4_peak_1817_lociStitched  | 7755  | 451 chr11:64546314-64546684   | SF1       | NM_001178031 | 4883 PYGM           | NM_001164716 | -12162  |
| chr7:36225294-36233005    | 1_peak_24772_lociStitched | 7712  | 452 chr7:36231586-36232114    | EEPDP1    | NM_030636    | 36313 KIAA0895      | NM_001199707 | 177633  |
| chr9:126098293-126106534  | 4_peak_28020_lociStitched | 5767  | 453 chr9:126101181-126103115  | CRB2      | NM_173689    | -16033 STRBP        | NM_001171137 | -71558  |
| chr22:22511404-22523366   | 3_peak_15003_lociStitched | 6564  | 454 chr22:22521752-22522846   | VPREB1    | NM_007128    | -81815 BMS1P20      | NR_027293    | -135078 |
| chr17:76755016-76778088   | 4_peak_9224_lociStitched  | 7854  | 455 chr17:76756046-76756386   | CYTH1     | NM_017456    | 11872 USP36         | NM_025090    | 70417   |
| chr5:133875575-133891843  | 6_peak_22088_lociStitched | 9994  | 456 chr5:133876272-133877338  | JADE2     | NM_015288    | 21911 SAR1B         | NM_016103    | 84824   |
| chr6:27857027-27863569    | peak_23006                | 6543  | 457 chr6:27862217-27863478    | HIST1H2AM | NM_003514    | 665 HIST1H2BO       | NM_003527    | -905    |
| chr2:6913490-6921981      | 2_peak_15612_lociStitched | 6091  | 458 chr2:6920819-6921471      | LINC00487 | NR_038369    | -7293 CMPK2         | NM_001256477 | 88215   |
| chr1:16156599-16172374    | 4_peak_11269_lociStitched | 7541  | 459 chr1:16162331-16162631    | SPEN      | NM_015001    | -9873 FLJ37453      | NR_024279    | 10156   |
| chr5:112258150-112265944  | 1_peak_21818_lociStitched | 7795  | 460 chr5:112258767-112259706  | REEP5     | NM_005669    | -4016 DCP2          | NR_038352    | -50360  |
| chr5:158301581-158326654  | 5_peak_22396_lociStitched | 12518 | 461 chr5:158303631-158303822  | EBF1      | NM_182708    | 212671 RNF145       | NM_001199382 | 320539  |
| chr18:2956029-2980488     | 5_peak_9312_lociStitched  | 13437 | 462 chr18:2970810-2971545     | LOC727896 | NR_026659    | -21637 LPIN2        | NM_014646    | 43687   |
| chr11:128586178-128606340 | 7_peak_2595_lociStitched  | 11256 | 463 chr11:128595529-128596189 | SENCR     | NR_038908    | -30341 FLI1         | NM_002017    | 32448   |
| chr9:563316-569657        | 2_peak_27144_lociStitched | 5154  | 464 chr9:565585-566155        | KANK1     | NM_015158    | 61791 DOCK8         | NM_001190458 | 293438  |
| chr15:44073260-44084317   | 3_peak_6072_lociStitched  | 7183  | 465 chr15:44081615-44082001   | SERF2     | NM_001018108 | -5252 SERINC4       | NM_001258032 | 13507   |
| chr14:51245604-51262971   | 7_peak_5143_lociStitched  | 7369  | 466 chr14:51256454-51256951   | NIN       | NM_016350    | 43552 ABHD12B       | NM_181814    | -84591  |
| chr3:67095627-67126865    | 5_peak_18821_lociStitched | 6732  | 467 chr3:67098583-67099238    | KBTBD8    | NM_032505    | 62519 LRIG1         | NM_015541    | -560401 |
| chr14:71120551-71136299   | 9_peak_5403_lociStitched  | 10267 | 468 chr14:71121876-71122561   | TTC9      | NM_015351    | 19921 MED6          | NM_001284210 | -61018  |
| chr15:38962112-38975814   | 7_peak_5973_lociStitched  | 7235  | 469 chr15:38965081-38965559   | C15ORF53  | NM_207444    | -19836 RASGRP1      | NM_001128602 | -111956 |
| chr3:152214157-152238990  | 5_peak_19417_lociStitched | 9972  | 470 chr3:152234002-152234412  | TMEM14E   | NM_001123228 | -167794 MBNL1       | NM_207294    | 209379  |
| chr8:101912205-101921248  | 3_peak_26727_lociStitched | 6326  | 471 chr8:101913824-101914692  | YWHAZ     | NM_001135702 | 46073 FLJ42969      | NR_033962    | -147556 |
| chr22:18538572-18555213   | 3_peak_14950_lociStitched | 5792  | 472 chr22:18548964-18549563   | PEX2F     | NM_001199319 | -13794 TUBA8        | NM_001193414 | -46561  |
| chr8:12608236-12624944    | 4_peak_25990_lociStitched | 7289  | 473 chr8:12614989-12615584    | LONRF1    | NM_152271    | -3598 LINC00681     | NR_102423    | -35162  |
| chr7:50305999-50322357    | 6_peak_24948_lociStitched | 10147 | 474 chr7:50321104-50322021    | IKZF1     | NM_001291839 | -29501 FIGNL1       | NM_001287495 | 203910  |
| chr1:178544463-178551584  | 1_peak_13095_lociStitched | 7122  | 475 chr1:178550107-178551284  | C1ORF220  | NR_033186    | 36092 TEX35         | NM_001170723 | 65811   |
| chr12:6534623-6538494     | peak_2697                 | 3872  | 476 chr12:6535977-6536962     | CD27      | NM_001242    | -17493 CD27-AS1     | NR_015382    | 24125   |

|                          |                            |       |     |                          |              |              |         |              |              |         |
|--------------------------|----------------------------|-------|-----|--------------------------|--------------|--------------|---------|--------------|--------------|---------|
| chr6:143163602-143180282 | 7_peak_24032_lociStitched  | 8067  | 477 | chr6:143169394-143169645 | HIVEP2       | NM_006734    | 94396   | LINC01277    | NR_038987    | 186777  |
| chr6:18327872-18344137   | 5_peak_22858_lociStitched  | 7377  | 478 | chr6:18330701-18331218   | RNF144B      | NM_182757    | -51577  | DEK          | NM_001134709 | -71205  |
| chr9:134127851-134151857 | 5_peak_28197_lociStitched  | 10710 | 479 | chr9:134129297-134129897 | FAM78A       | NM_033387    | 12052   | PPAPDC3      | NM_032728    | -25227  |
| chr2:197097530-197107839 | 2_peak_17495_lociStitched  | 6619  | 480 | chr2:197106808-197107371 | STK17B       | NM_004226    | -66348  | DNAH7        | NM_018897    | -169148 |
| chr3:186232850-186253341 | 8_peak_19673_lociStitched  | 7653  | 481 | chr3:186243706-186244360 | CRYGS        | NM_017541    | 19072   | TBCCD1       | NM_018138    | 42048   |
| chr2:37540789-37577664   | 5_peak_15939_lociStitched  | 8420  | 482 | chr2:37560395-37560651   | QPCT         | NM_012413    | -12527  | PRKD3        | NM_005813    | -15004  |
| chr12:46600859-46615857  | 5_peak_3095_lociStitched   | 9659  | 483 | chr12:46611503-46612356  | SLC38A1      | NM_001278389 | 51920   | SLC38A2      | NM_018976    | 158287  |
| chr14:64968015-64975366  | 1_peak_5303_lociStitched   | 7352  | 484 | chr14:64971853-64972232  | ZBTB1        | NM_001123329 | 398     | ZBTB25       | NM_006977    | -1136   |
| chr15:42782423-42798016  | 7_peak_6052_lociStitched   | 6520  | 485 | chr15:42795895-42796498  | SNAP23       | NM_130798    | 2715    | ZNF106       | NM_001284307 | -6824   |
| chr14:61967210-61972365  | 1_peak_5257_lociStitched   | 5156  | 486 | chr14:61969381-61970580  | FLJ22447     | NR_039985    | -67471  | HIF1A        | NM_181054    | -192332 |
| chr7:22461606-22488123   | 6_peak_24591_lociStitched  | 10322 | 487 | chr7:22484868-22485511   | STEAP1B      | NM_001164460 | 65037   | LOC100506178 | NR_038393    | -128092 |
| chr20:48236536-48251667  | 4_peak_14347_lociStitched  | 9823  | 488 | chr20:48236827-48237369  | PTGIS        | NM_000961    | -59394  | KCNB1        | NM_004975    | -144920 |
| chr16:15726035-15736945  | 3_peak_7072_lociStitched   | 6823  | 489 | chr16:15732941-15733437  | KIAA0430     | NM_001184999 | 5533    | NDE1         | NM_001143979 | -5634   |
| chr11:73076990-73099053  | 3_peak_2061_lociStitched   | 10951 | 490 | chr11:73095682-73096690  | RELT         | NM_032871    | 308     | ARHGEF17     | NM_014786    | 68358   |
| chr17:74476653-74497290  | 3_peak_9124_lociStitched   | 8397  | 491 | chr17:74476883-74478330  | RHBDF2       | NM_001005498 | -2980   | AANAT        | NM_001088    | 23341   |
| chrX:119882502-119890818 | 2_peak_29091_lociStitched  | 7272  | 492 | chrX:119887235-119887658 | C1GALT1C1    | NM_001011551 | -122655 | MCTS1        | NM_001137554 | 148108  |
| chr8:96224802-96249202   | 8_peak_26676_lociStitched  | 10137 | 493 | chr8:96226851-96227301   | LINC01298    | NR_046232    | -8400   | C8ORF37-AS1  | NR_038207    | -44062  |
| chr2:61065978-61071609   | 1_peak_16228_lociStitched  | 5632  | 494 | chr2:61067926-61068756   | LINC01185    | NR_033980    | 39656   | REL          | NM_001291746 | -39837  |
| chr3:169648930-169681551 | 8_peak_19512_lociStitched  | 6869  | 495 | chr3:169658257-169658858 | LOC100128164 | NR_024409    | 19282   | SEC62        | NM_003262    | -19340  |
| chr18:74757658-74793050  | 9_peak_9795_lociStitched   | 9965  | 496 | chr18:74766595-74767483  | MBP          | NM_001025092 | -46299  | ZNF236       | NM_007345    | 239238  |
| chr16:22448183-22464457  | 3_peak_7187_lociStitched   | 7581  | 497 | chr16:22448536-22448952  | RRN3P3       | NR_027460    | -7284   | SMG1P1       | NR_027154    | 7991    |
| chr17:29815441-29836635  | 3_peak_8409_lociStitched   | 6900  | 498 | chr17:29818313-29819149  | RAB11FIP4    | NM_032932    | 107396  | EVI2A        | NM_014210    | -177271 |
| chr10:88151157-88174298  | 4_peak_766_lociStitched    | 6475  | 499 | chr10:88172744-88173537  | GRID1        | NM_017551    | -36477  | WAPAL        | NM_015045    | 118814  |
| chr10:11576852-11621735  | 11_peak_152_lociStitched   | 11523 | 500 | chr10:11577403-11577860  | USP6NL       | NM_001080491 | -25014  | ECHDC3       | NM_024693    | -185063 |
| chr16:57557122-57573935  | 4_peak_7551_lociStitched   | 5353  | 501 | chr16:57570908-57571959  | CCDC102A     | NM_033212    | 4949    | GPR114       | NM_153837    | -11073  |
| chr8:103818098-103843675 | 4_peak_26763_lociStitched  | 7569  | 502 | chr8:103819485-103819959 | AZIN1        | NM_148174    | 45542   | ATP6V1C1     | NM_001695    | -202362 |
| chr10:46147976-46158837  | 4_peak_456_lociStitched    | 9330  | 503 | chr10:46148947-46149865  | ZFAND4       | NM_174890    | 14774   | FAM21C       | NM_001169107 | -69242  |
| chr3:14466102-14474775   | 3_peak_18149_lociStitched  | 7129  | 504 | chr3:14472939-14474155   | SLC6A6       | NM_001134368 | 26362   | GRIP2        | NM_001080423 | 111412  |
| chr16:11862436-11879310  | 6_peak_7013_lociStitched   | 6353  | 505 | chr16:11876753-11877712  | ZC3H7A       | NM_014153    | 20241   | BCAR4        | NR_024050    | 51816   |
| chr13:31015295-31038673  | 6_peak_4321_lociStitched   | 6998  | 506 | chr13:31017916-31018684  | HMGB1        | NM_002128    | 13097   | LINC00426    | NR_024464    | -78933  |
| chr10:63657753-63666429  | 2_peak_533_lociStitched    | 6963  | 507 | chr10:63661994-63662213  | ARID5B       | NM_032199    | 328     | C10ORF107    | NM_173554    | 238622  |
| chr6:159447983-159484454 | 6_peak_24265_lociStitched  | 8344  | 508 | chr6:159463509-159463997 | TAGAP        | NM_138810    | -34     | RSPH3        | NM_031924    | -45020  |
| chr3:49977472-49994741   | 3_peak_18638_lociStitched  | 7095  | 509 | chr3:49984128-49984977   | RBM6         | NM_001167582 | 8629    | MON1A        | NM_001142501 | -18661  |
| chr7:93678292-93683837   | 3_peak_25254_lociStitched  | 4812  | 510 | chr7:93679097-93679835   | BET1         | NM_005868    | -47374  | GNG11        | NM_004126    | 130048  |
| chr6:146184322-146189397 | 1_peak_24074_lociStitched  | 5076  | 511 | chr6:146186786-146187370 | LOC100507557 | NR_038245    | 50847   | FBXO30       | NM_032145    | -50938  |
| chr16:56454247-56459000  | 1_peak_7529_lociStitched   | 4754  | 512 | chr16:56457540-56458026  | AMFR         | NM_001144    | 2827    | NUDT21       | NM_007006    | 28638   |
| chrX:118799590-118830909 | 11_peak_29059_lociStitched | 13759 | 513 | chrX:118819341-118820499 | SEPT6        | NM_015129    | 12084   | SOWAHD       | NM_001105576 | -77327  |
| chr16:29596244-29623330  | 8_peak_7349_lociStitched   | 10237 | 514 | chr16:29621758-29622625  | SLC7A5P1     | NR_002593    | 15251   | SMG1P2       | NR_002473    | -32247  |
| chr4:78073536-78078356   | 1_peak_20485_lociStitched  | 4821  | 515 | chr4:78076882-78077348   | CCNG2        | NM_004354    | -2411   | CCNI         | NM_006835    | -78821  |
| chr1:45178250-45197194   | 4_peak_11888_lociStitched  | 6676  | 516 | chr1:45178875-45179523   | KIF2C        | NM_001297655 | -17768  | RPS8         | NM_001012    | -53524  |
| chr17:28032492-28054358  | 4_peak_8381_lociStitched   | 5599  | 517 | chr17:28033462-28034214  | SSH2         | NM_001282131 | 45025   | CORO6        | NM_032854    | -94984  |
| chr17:66201584-66235624  | 6_peak_9005_lociStitched   | 7377  | 518 | chr17:66233484-66234294  | LOC440461    | NR_027283    | 23803   | AMZ2         | NM_001033574 | -25541  |
| chr3:71603609-71635968   | 5_peak_18867_lociStitched  | 8720  | 519 | chr3:71631098-71631809   | FOXP1        | NM_001244808 | 13116   | EIF4E3       | NM_001134651 | 154738  |
| chr22:50972565-50981398  | 2_peak_15574_lociStitched  | 6083  | 520 | chr22:50973606-50973941  | ODF3B        | NM_001014440 | -5973   | TYMP         | NM_001113756 | -8467   |
| chr17:3587409-3600288    | 10_peak_8036_lociStitched  | 9359  | 521 | chr17:3599498-3599881    | P2RX5        | NM_001204520 | 5850    | GS2          | NM_031965    | -33349  |
| chr1:219349816-219363710 | 3_peak_13483_lociStitched  | 5404  | 522 | chr1:219361666-219361999 | LYPLAL1      | NM_001300772 | 8452    | LYPLAL1-AS1  | NR_038845    | -9633   |
| chr22:41870771-41876927  | 2_peak_15421_lociStitched  | 5852  | 523 | chr22:41873898-41875287  | ACO2         | NM_001098    | 8720    | PHF5A        | NM_032758    | -9141   |
| chr3:62801278-62821895   | 6_peak_18779_lociStitched  | 7359  | 524 | chr3:62803960-62804380   | CADPS        | NM_183393    | 49478   | LINC00698    | NR_027104    | -276778 |
| chr2:198158027-198174975 | 5_peak_17520_lociStitched  | 9410  | 525 | chr2:198172044-198172380 | ANKRD44      | NM_001195144 | 9020    | SF3B1        | NM_001005526 | 133270  |
| chr21:45615805-45640665  | 4_peak_14873_lociStitched  | 5835  | 526 | chr21:45626516-45627629  | ICOSL        | NM_001283050 | 32652   | DNMT3L       | NM_013369    | 53864   |
| chr5:158378652-158387103 | 3_peak_22400_lociStitched  | 7950  | 527 | chr5:158385287-158385669 | EBF1         | NM_182708    | 143911  | RNF145       | NM_001199382 | 251779  |
| chr1:28453064-28478958   | 6_peak_11572_lociStitched  | 8281  | 528 | chr1:28474498-28475075   | PTAFR        | NM_000952    | 37444   | DNAJC8       | NM_014280    | 93531   |
| chr20:57695557-57700274  | 1_peak_14539_lociStitched  | 4718  | 529 | chr20:57695557-57696442  | ZNF831       | NM_178457    | -68160  | EDN3         | NM_001302456 | -177567 |

|                           |                            |       |     |                           |              |              |        |              |              |         |
|---------------------------|----------------------------|-------|-----|---------------------------|--------------|--------------|--------|--------------|--------------|---------|
| chr3:72183876-72236059    | 8_peak_18884_lociStitched  | 9275  | 530 | chr3:72212992-72213931    | LINC00870    | NR_038221    | 9559   | RYBP         | NM_012234    | 285807  |
| chr7:2327799-2353957      | 6_peak_24388_lociStitched  | 11295 | 531 | chr7:2339428-2339943      | SNX8         | NM_013321    | 13232  | EIF3B        | NM_003751    | -53596  |
| chr8:56883337-56919199    | 10_peak_26345_lociStitched | 9778  | 532 | chr8:56903283-56904032    | SNORD54      | NR_002437    | 85192  | RPS20        | NM_001023    | 85872   |
| chr9:6409748-6434178      | 7_peak_27214_lociStitched  | 10133 | 533 | chr9:6412517-6413258      | UHRF2        | NM_152896    | 8812   | TPD52L3      | NM_001001874 | 93614   |
| chr10:49875423-49891230   | 6_peak_469_lociStitched    | 6929  | 534 | chr10:49875943-49876689   | WDFY4        | NM_020945    | -10192 | ARHGAP22     | NR_045675    | -19016  |
| chr13:30944820-30951478   | 2_peak_4316_lociStitched   | 6552  | 535 | chr13:30945701-30946439   | LINC00426    | NR_024464    | -98    | KATNAL1      | NM_032116    | -66525  |
| chr9:96030509-96058060    | 6_peak_27719_lociStitched  | 7789  | 536 | chr9:96030785-96031753    | C9ORF129     | NM_001098808 | 64412  | FAM120A      | NM_001286723 | -169694 |
| chr1:225613015-225633378  | 4_peak_13557_lociStitched  | 8672  | 537 | chr1:225623237-225624189  | LBR          | NM_194442    | -6639  | ENAH         | NM_018212    | 217649  |
| chr22:50730797-50757247   | 10_peak_15554_lociStitched | 11359 | 538 | chr22:50730814-50731635   | PLXNB2       | NM_012401    | 1979   | DENND6B      | NM_001001794 | 21467   |
| chr13:103682569-103687974 | 1_peak_4821_lociStitched   | 5406  | 539 | chr13:103683751-103684246 | SLC10A2      | NM_000452    | 33925  | METTL21EP    | NR_026965    | 152822  |
| chr16:69403376-69416070   | 4_peak_7644_lociStitched   | 7581  | 540 | chr16:69405467-69405944   | TERF2        | NM_005652    | 10168  | TMED6        | NM_144676    | -24011  |
| chr7:5719066-5743715      | 6_peak_24443_lociStitched  | 6994  | 541 | chr7:5732893-5733787      | RNF216-IT1   | NR_046834    | -11298 | FSCN1        | NM_003088    | 98954   |
| chr5:158238770-158254087  | 7_peak_22384_lociStitched  | 10834 | 542 | chr5:158246990-158247549  | EBF1         | NM_182708    | 280360 | RNF145       | NM_001199382 | 388228  |
| chr12:95581715-95599726   | 6_peak_3620_lociStitched   | 8203  | 543 | chr12:95591501-95591942   | FGD6         | NM_018351    | 20520  | VEZT         | NM_017599    | -20802  |
| chr19:44261782-44288914   | 8_peak_10743_lociStitched  | 7744  | 544 | chr19:44269562-44270277   | KCNN4        | NM_002250    | 10061  | LYPD5        | NM_001288763 | 28833   |
| chr13:111814186-111839838 | 7_peak_4850_lociStitched   | 7574  | 545 | chr13:111836900-111837689 | ARHGFE7      | NM_001113513 | -12161 | TEX29        | NM_152324    | -146003 |
| chr12:32039692-32060541   | 5_peak_3023_lociStitched   | 7083  | 546 | chr12:32059525-32060161   | KIAA1551     | NM_018169    | -62237 | RNU6-78P     | NR_046944    | 96686   |
| chr19:17178075-17221581   | 14_peak_10316_lociStitched | 7895  | 547 | chr19:17220713-17221182   | MYO9B        | NM_004145    | 13237  | HAUS8        | NM_033417    | -13485  |
| chr1:54290797-54304329    | 2_peak_12008_lociStitched  | 4641  | 548 | chr1:54303074-54303702    | NDC1         | NR_033142    | 6662   | YIPF1        | NM_018982    | 57924   |
| chr16:58446307-58473259   | 7_peak_7571_lociStitched   | 6846  | 549 | chr16:58460005-58460451   | GIN53        | NM_001126130 | 33485  | NDRG4        | NM_020465    | -37766  |
| chr3:13043754-13063822    | 8_peak_18116_lociStitched  | 9663  | 550 | chr3:13056423-13057384    | IQSEC1       | NM_014869    | -44590 | RPL32        | NM_000994    | -170707 |
| chr3:177055054-177079469  | 7_peak_19565_lociStitched  | 10265 | 551 | chr3:177077626-177078025  | LINC00578    | NR_047568    | -92448 | TBL1XR1      | NM_024665    | -152213 |
| chr8:86096583-86113406    | 3_peak_26602_lociStitched  | 8184  | 552 | chr8:86102272-86102707    | E2F5         | NM_001083589 | 5084   | C8ORF59      | NM_001293320 | 27657   |
| chr2:183580040-183593306  | 3_peak_17405_lociStitched  | 6154  | 553 | chr2:183580452-183580847  | DNAJC10      | NR_073367    | 5905   | FRZB         | NM_001463    | 144825  |
| chr1:55718151-55726817    | 3_peak_12025_lociStitched  | 5801  | 554 | chr1:55725691-55726322    | LOC100507634 | NR_038320    | 41403  | USP24        | NM_015306    | -41445  |
| chr20:46096432-46122859   | 5_peak_14298_lociStitched  | 7240  | 555 | chr20:46097123-46097676   | NCOA3        | NM_001174087 | -20956 | ZMYND8       | NM_001281769 | -124012 |
| chr15:80300572-80311199   | 2_peak_6566_lociStitched   | 6361  | 556 | chr15:80304349-80304807   | BCL2A1       | NM_004049    | -42242 | ST20         | NR_037653    | -89789  |
| chr19:50918186-50935266   | 4_peak_10946_lociStitched  | 9547  | 557 | chr19:50922736-50923097   | SPIB         | NM_001243998 | 4531   | MYBPC2       | NM_004533    | -9434   |
| chr11:59038227-59052452   | 2_peak_1679_lociStitched   | 5235  | 558 | chr11:59040177-59041400   | MPEG1        | NM_001039396 | -64845 | DTX4         | NM_015177    | 105527  |
| chr6:158182278-158190919  | 4_peak_24241_lociStitched  | 4787  | 559 | chr6:158184767-158186179  | SNX9         | NM_016224    | -57605 | SYNJ2        | NM_003898    | -216290 |
| chr6:87808030-87833887    | 4_peak_23614_lociStitched  | 7211  | 560 | chr6:87833708-87833959    | CGA          | NM_000735    | -16093 | ZNF292       | NM_015021    | -44311  |
| chr9:112669306-112681905  | 7_peak_27836_lociStitched  | 7111  | 561 | chr9:112680572-112681010  | PALM2        | NM_053016    | 133028 | AKAP2        | NM_001004065 | -135273 |
| chr19:39888644-39901638   | 4_peak_10639_lociStitched  | 8235  | 562 | chr19:39900435-39901092   | ZFP36        | NM_003407    | -2346  | PLEKHG2      | NM_022835    | -8609   |
| chr22:39459205-39470173   | 3_peak_15347_lociStitched  | 6954  | 563 | chr22:39461968-39462496   | APOBEC3G     | NM_021822    | -8321  | APOBEC3H     | NM_001166002 | -28540  |
| chr16:46943758-46953788   | 5_peak_7474_lociStitched   | 6802  | 564 | chr16:46944907-46945308   | GPT2         | NM_001142466 | 29671  | C16ORF87     | NM_001001436 | -83699  |
| chr4:185186943-185210232  | 6_peak_21112_lociStitched  | 8382  | 565 | chr4:185204252-185204728  | ENPP6        | NM_153343    | -59473 | LOC728175    | NR_040108    | 76543   |
| chr4:114557358-114564341  | 3_peak_20770_lociStitched  | 6502  | 566 | chr4:114557704-114558544  | CAMK2D       | NM_172115    | 122234 | ARSJ         | NM_024590    | 340029  |
| chr19:38441759-38477596   | 7_peak_10605_lociStitched  | 8128  | 567 | chr19:38469514-38470244   | SIPA1L3      | NM_015073    | 61816  | WDR87        | NM_031951    | -62331  |
| chr2:106411599-106417688  | 1_peak_16809_lociStitched  | 6090  | 568 | chr2:106413592-106414292  | NCK2         | NM_001004722 | 53123  | LOC285000    | NR_038891    | -187627 |
| chr14:77814057-77841009   | 12_peak_5504_lociStitched  | 9407  | 569 | chr14:77826985-77827371   | TMED8        | NM_213601    | 15863  | SAMD15       | NM_001010860 | -16229  |
| chr12:6538707-6544074     | peak_2698                  | 5368  | 570 | chr12:6541770-6543553     | CD27         | NM_001242    | -12661 | CD27-AS1     | NR_015382    | 19293   |
| chr10:30704273-30745072   | 10_peak_340_lociStitched   | 12543 | 571 | chr10:30722096-30723758   | MAP3K8       | NM_001244134 | 1722   | MTPAP        | NM_018109    | -86405  |
| chr16:30195153-30205653   | 4_peak_7371_lociStitched   | 6258  | 572 | chr16:30196777-30197505   | LOC606724    | NR_002454    | 398    | SLX1A        | NM_001015000 | -4761   |
| chr19:13262774-13274293   | 4_peak_10208_lociStitched  | 6322  | 573 | chr19:13266072-13267541   | IER2         | NM_004907    | 7251   | STX10        | NM_001271611 | -7345   |
| chr1:149810791-149815924  | peak_12600                 | 5134  | 574 | chr1:149812853-149813595  | HIST2H3C     | NM_021059    | -592   | HIST2H2AA4   | NM_001040874 | 961     |
| chr6:155479184-155505754  | 5_peak_24172_lociStitched  | 9435  | 575 | chr6:155497684-155497975  | TIAM2        | NM_001010927 | -45628 | CLDN20       | NM_001001346 | -92678  |
| chr12:72079408-72089224   | 4_peak_3480_lociStitched   | 6880  | 576 | chr12:72081800-72082151   | TMEM19       | NM_018279    | 4438   | ZFC3H1       | NM_144982    | -26567  |
| chr11:111235201-111253634 | 6_peak_2351_lociStitched   | 7855  | 577 | chr11:111249859-111250868 | POU2AF1      | NM_006235    | 5740   | LOC100132078 | NR_046085    | 44494   |
| chr5:96206110-96233214    | 5_peak_21751_lociStitched  | 8142  | 578 | chr5:96221768-96222064    | ERAP2        | NM_001130140 | 8018   | LNPEP        | NM_005575    | -51684  |
| chr16:85787758-85793323   | 3_peak_7835_lociStitched   | 5308  | 579 | chr16:85789582-85790802   | C16ORF74     | NM_206967    | -5851  | EMC8         | NM_001142288 | 42608   |
| chr1:149820798-149826264  | peak_12602                 | 5467  | 580 | chr1:149823317-149824113  | HIST2H3C     | NM_021059    | -650   | HIST2H2AA4   | NM_001040874 | 903     |
| chr18:77219351-77227358   | 3_peak_9817_lociStitched   | 5194  | 581 | chr18:77220292-77220733   | NFATC1       | NM_001278673 | 63080  | CTDP1        | NM_048368    | -216447 |
| chr3:119256872-119282200  | 9_peak_19083_lociStitched  | 13761 | 582 | chr3:119274192-119274615  | CD80         | NM_005191    | 8945   | ADPRH        | NM_001291950 | -28744  |

|                           |                            |      |     |                           |              |              |        |            |              |         |
|---------------------------|----------------------------|------|-----|---------------------------|--------------|--------------|--------|------------|--------------|---------|
| chr22:43508669-43518362   | 5_peak_15481_lociStitched  | 8825 | 583 | chr22:43514848-43515436   | BIK          | NM_001197    | 6761   | TTLL1      | NM_012263    | -28081  |
| chr6:107149289-107178272  | 5_peak_23754_lociStitched  | 6199 | 584 | chr6:107163587-107164367  | LOC100422737 | NR_033557    | 71520  | C6ORF203   | NM_001142468 | -185596 |
| chr12:67006135-67019303   | 5_peak_3401_lociStitched   | 5639 | 585 | chr12:67010299-67010934   | GRIP1        | NM_001178074 | 60206  | HELB       | NM_033647    | 316384  |
| chr17:38017579-38027705   | 3_peak_8525_lociStitched   | 6581 | 586 | chr17:38021125-38022119   | ZBPB2        | NM_198844    | -1813  | IKZF3      | NM_001257413 | -2201   |
| chr20:46062389-46081161   | 6_peak_14292_lociStitched  | 6836 | 587 | chr20:46067273-46067847   | NCOA3        | NM_001174087 | -58826 | ZMYND8     | NM_001281769 | -86142  |
| chr6:32571096-32602559    | 14_peak_23130_lociStitched | 7748 | 588 | chr6:32590866-32591058    | HLA-DQA1     | NM_002122    | -18356 | HLA-DQB1   | NM_002123    | 47639   |
| chr17:1100843-1133001     | 9_peak_7976_lociStitched   | 6773 | 589 | chr17:1101282-1102061     | ABR          | NM_001159746 | -26306 | BHLHA9     | NM_001164405 | -56936  |
| chr1:38386060-38406273    | 7_peak_11772_lociStitched  | 7072 | 590 | chr1:38388492-38388879    | INPP5B       | NM_001297434 | 1297   | SF3A3      | NM_006802    | 59595   |
| chr7:155512877-155518346  | 1_peak_25830_lociStitched  | 5470 | 591 | chr7:155517230-155517526  | RBM33        | NM_053043    | 78408  | CNPY1      | NM_001103176 | -189072 |
| chrX:40027489-40036770    | 3_peak_28671_lociStitched  | 8630 | 592 | chrX:40028763-40029656    | BCOR         | NM_001123384 | 4453   | ATP6AP2    | NM_005765    | -408087 |
| chr1:33113068-33127821    | 3_peak_11692_lociStitched  | 5647 | 593 | chr1:33115760-33116297    | RBBP4        | NM_001153256 | 3485   | ZBTB8OS    | NM_178547    | -4259   |
| chr9:112716188-112737696  | 4_peak_27844_lociStitched  | 8312 | 594 | chr9:112734332-112735046  | AKAP2        | NM_001004065 | -83936 | C9ORF152   | NM_001012993 | 243471  |
| chr3:129128333-129158816  | 4_peak_19207_lociStitched  | 7647 | 595 | chr3:129155280-129155549  | EFCAB12      | NM_207307    | 3920   | IFT122     | NM_052990    | -15305  |
| chr10:116255663-116260086 | 1_peak_1101_lociStitched   | 4424 | 596 | chr10:116256538-116256880 | ABLIM1       | NM_006720    | 28811  | AFAP1L2    | NM_032550    | -93337  |
| chr13:77902425-77934375   | 5_peak_4718_lociStitched   | 6670 | 597 | chr13:77913032-77913869   | MYCBP2       | NM_015057    | -17223 | SCEL       | NM_001160706 | -191409 |
| chr5:136406345-136412230  | 2_peak_22109_lociStitched  | 3848 | 598 | chr5:136408126-136408837  | SPOCK1       | NM_004598    | 425731 | KLHL3      | NM_001257195 | 632829  |
| chr9:33117092-33165452    | 10_peak_27304_lociStitched | 9638 | 599 | chr9:33158944-33159370    | B4GALT1      | NM_001497    | 26084  | SPINK4     | NM_014471    | -98924  |
| chr19:38402280-38422835   | 7_peak_10595_lociStitched  | 8055 | 600 | chr19:38405483-38405922   | SIPA1L3      | NM_0015073   | 14696  | WDR87      | NM_031951    | -15211  |
| chr6:2854076-2864185      | 4_peak_22651_lociStitched  | 6379 | 601 | chr6:2854211-2854997      | SERPINB1     | NM_030666    | -16847 | SERPINB9P1 | NR_033851    | 17614   |
| chr3:11640351-11647257    | 3_peak_18098_lociStitched  | 5280 | 602 | chr3:11643014-11643664    | VGLL4        | NM_001284391 | 2251   | TAMM41     | NM_138807    | 244589  |
| chr4:113200049-113211146  | 4_peak_20752_lociStitched  | 8996 | 603 | chr4:113205584-113206414  | TIFA         | NM_052864    | 1462   | ALPK1      | NM_001253884 | -12902  |
| chr17:7738078-7754992     | 4_peak_8145_lociStitched   | 7679 | 604 | chr17:7745633-7747298     | KDM6B        | NM_001080424 | 3300   | TMEM88     | NM_203411    | -11849  |
| chr9:100747170-100755383  | 2_peak_27762_lociStitched  | 8016 | 605 | chr9:100753657-100753952  | ANP32B       | NM_006401    | 5787   | HEMGN      | NM_018437    | -44079  |
| chr2:98626551-98644981    | 4_peak_16718_lociStitched  | 8131 | 606 | chr2:98643292-98644339    | TMEM131      | NM_015348    | -23412 | VWA3B      | NM_144992    | -67829  |
| chr1:1706767-1714944      | 2_peak_11105_lociStitched  | 7435 | 607 | chr1:1710279-1710834      | NADK         | NM_001198993 | -558   | SLC35E2    | NM_001199787 | -33417  |
| chr16:10881662-10907447   | 6_peak_6947_lociStitched   | 9037 | 608 | chr16:10884932-10885310   | TVP23A       | NM_001079512 | 18067  | CIITA      | NM_001286403 | -76501  |
| chr4:26824096-26834223    | 4_peak_20196_lociStitched  | 5794 | 609 | chr4:26828365-26828794    | STIM2        | NM_020860    | -33154 | TBC1D19    | NM_001292054 | 243613  |
| chr17:43373196-43394000   | 6_peak_8642_lociStitched   | 8064 | 610 | chr17:43373270-43373717   | MAP3K14      | NM_003954    | 10832  | SPATA32    | NM_152343    | -44119  |
| chr16:87836604-87845717   | 3_peak_7878_lociStitched   | 4845 | 611 | chr16:87842983-87844478   | KLHDC4       | NM_001184854 | -41562 | SLC7A5     | NM_003486    | 61940   |
| chr15:85871145-85875263   | 1_peak_6625_lociStitched   | 4119 | 612 | chr15:85874095-85874816   | AKAP13       | NM_006738    | -50643 | LOC642423  | NR_049748    | -124686 |
| chr10:23648698-23660868   | 4_peak_284_lociStitched    | 7183 | 613 | chr10:23657748-23658623   | C10ORF67     | NM_153714    | -21011 | OTUD1      | NM_001145373 | -73415  |
| chr3:14727809-14733604    | 1_peak_18153_lociStitched  | 5796 | 615 | chr3:14728827-14729297    | C3ORF20      | NM_001184957 | 14100  | CCDC174    | NM_016474    | 37453   |
| chr13:27721506-27752076   | 7_peak_4249_lociStitched   | 9748 | 616 | chr13:27750685-27751418   | USP12        | NM_182488    | 9242   | RPL21      | NM_000982    | -88901  |
| chr17:26371520-26385359   | 4_peak_8339_lociStitched   | 8689 | 617 | chr17:26380798-26381124   | NLK          | NM_016231    | 8751   | LYRM9      | NM_001076680 | -158030 |
| chr18:77265673-77284854   | 8_peak_9821_lociStitched   | 6308 | 618 | chr18:77283563-77284116   | NFATC1       | NM_001278673 | 114989 | CTDP1      | NM_048368    | -164538 |
| chr1:159024469-159042847  | 4_peak_12851_lociStitched  | 5181 | 619 | chr1:159037515-159038413  | AIM2         | NM_004833    | 12989  | IFI16      | NM_005531    | 53976   |
| chr12:113645438-113671033 | 6_peak_3913_lociStitched   | 7836 | 620 | chr12:113646007-113646962 | IQCD         | NM_138451    | 664    | TPCN1      | NM_017901    | -1008   |
| chr16:30222663-30236510   | 10_peak_7375_lociStitched  | 8101 | 621 | chr16:30226887-30227317   | LOC613038    | NR_002557    | -11338 | SULT1A3    | NM_177552    | 19037   |
| chr20:4952788-4971211     | 4_peak_13885_lociStitched  | 7451 | 622 | chr20:4970234-4970495     | SLC23A2      | NM_005116    | 20146  | TMEM230    | NM_014145    | 131734  |
| chr9:135256860-135260694  | 1_peak_28237_lociStitched  | 3835 | 623 | chr9:135257485-135257974  | TTF1         | NM_001205296 | 23461  | C9ORF171   | NM_001282957 | -26806  |
| chr2:214091932-214104079  | 5_peak_17635_lociStitched  | 6261 | 624 | chr2:214097614-214098265  | LOC100130451 | NM_001242575 | 50924  | SPAG16     | NM_001025436 | -51098  |
| chr1:207585087-207606142  | 3_peak_13425_lociStitched  | 9753 | 625 | chr1:207603790-207604352  | CR2          | NM_001877    | -32031 | CR1        | NM_000573    | -73859  |
| chr6:132004122-132013737  | 4_peak_23902_lociStitched  | 7712 | 626 | chr6:132004627-132005093  | OR2A4        | NM_030908    | 13612  | CTAGE9     | NM_001145659 | 23228   |
| chr2:60776007-60784243    | 2_peak_16224_lociStitched  | 7951 | 627 | chr2:60782027-60783045    | BCL11A       | NM_018014    | 508    | PAPOLG     | NM_022894    | -203240 |
| chr5:78010694-78030153    | 7_peak_21637_lociStitched  | 5057 | 628 | chr5:78023679-78024271    | LHFPL2       | NM_005779    | -75775 | SCAMP1     | NM_001290229 | 364096  |
| chr2:89050506-89055426    | 2_peak_16595_lociStitched  | 4783 | 629 | chr2:89053775-89054399    | ANKRD36BP2   | NR_015424    | -12453 | RPIA       | NM_144563    | 61790   |
| chr15:67368322-67403302   | 9_peak_6379_lociStitched   | 9544 | 630 | chr15:67385724-67386251   | SMAD3        | NM_005902    | 27617  | AAGAB      | NM_024666    | 161262  |
| chr8:142172597-142193716  | 6_peak_27071_lociStitched  | 6554 | 632 | chr8:142192120-142192938  | DENND3       | NM_014957    | 44436  | SLC45A4    | NM_001080431 | 55517   |
| chr8:22831067-22840504    | 4_peak_26032_lociStitched  | 6095 | 633 | chr8:22831586-22832201    | RHOBT2       | NM_001160036 | -9145  | PEBP4      | NM_144962    | -50364  |
| chr10:134360614-134386389 | 8_peak_1248_lociStitched   | 7290 | 634 | chr10:134385489-134385861 | INPP5A       | NM_005539    | 22148  | C10ORF91   | NM_173541    | 114787  |
| chr5:131750112-131763816  | 3_peak_22036_lociStitched  | 6863 | 635 | chr5:131756528-131756871  | C5ORF56      | NR_045116    | 10499  | LOC531303  | NR_110997    | -151356 |
| chr8:29595119-29610838    | 5_peak_26138_lociStitched  | 8112 | 636 | chr8:29602811-29603608    | LINC00589    | NR_026765    | 2647   | FAM183CP   | NR_024473    | -176051 |
| chr4:26883826-26888404    | 2_peak_20204_lociStitched  | 4450 | 637 | chr4:26887596-26887787    | STIM2        | NM_020860    | 23802  | TBC1D19    | NM_001292054 | 300569  |



|                           |                            |       |                               |           |              |                  |              |         |
|---------------------------|----------------------------|-------|-------------------------------|-----------|--------------|------------------|--------------|---------|
| chr3:19383755-19390592    | 3_peak_18273_lociStitched  | 5790  | 638 chr3:19389165-19389759    | KCNH8     | NM_144633    | 197156 SATB1     | NM_001131010 | -906908 |
| chr8:11274119-11317227    | 13_peak_25961_lociStitched | 10998 | 639 chr8:11275397-11275870    | FAM167A   | NM_053279    | 28603 BLK        | NM_001715    | -55848  |
| chr15:31507912-31531526   | 6_peak_5918_lociStitched   | 6731  | 640 chr15:31528232-31528786   | LOC283710 | NM_001243538 | 3331 TRPM1       | NM_001252020 | -66243  |
| chr9:130788057-130796034  | 2_peak_28117_lociStitched  | 6761  | 641 chr9:130788553-130788927  | NAIF1     | NM_197956    | 37554 SLC25A25   | NM_001006641 | -38434  |
| chr1:220392354-220397330  | 1_peak_13501_lociStitched  | 4977  | 642 chr1:220393226-220393720  | SNORA36B  | NR_002994    | -20824 AURKAPS1  | NR_001587    | 46215   |
| chr10:11637091-11653161   | 3_peak_157_lociStitched    | 7153  | 643 chr10:11652249-11652579   | USP6NL    | NM_014688    | 8662 ECHDC3      | NM_024693    | -139230 |
| chr7:5564927-5573121      | 4_peak_24441_lociStitched  | 7432  | 644 chr7:5571146-5572019      | ACTB      | NM_001101    | 1208 FBXL18      | NM_024963    | -15625  |
| chr8:60017479-60031728    | 5_peak_26392_lociStitched  | 11154 | 645 chr8:60030769-60031291    | TOX       | NM_014729    | 7164 NSMAF       | NM_003580    | -452199 |
| chr3:151911514-151923942  | 4_peak_19395_lociStitched  | 8344  | 646 chr3:151923133-151923362  | MBNL1     | NM_207292    | -68101 MBNL1-AS1 | NR_027038    | 69687   |
| chr7:73506934-73516797    | 2_peak_25090_lociStitched  | 5229  | 647 chr7:73515035-73516159    | LIMK1     | NM_001204426 | 4379 ELN         | NM_001278918 | 69746   |
| chr2:241975599-241982009  | 2_peak_17978_lociStitched  | 6113  | 648 chr2:241981048-241981615  | SNED1     | NM_001080437 | 40549 LOC200772  | NR_033841    | -71936  |
| chr12:92828423-92841234   | 3_peak_3569_lociStitched   | 3475  | 649 chr12:92838576-92839945   | CLLU1OS   | NM_001025232 | -12904 CLLU1     | NM_001025233 | 17093   |
| chr12:12867365-12889973   | 4_peak_2841_lociStitched   | 9663  | 650 chr12:12878756-12879047   | APOLD1    | NM_001130415 | -182 CDKN1B      | NM_004064    | 8465    |
| chr10:103726390-103746464 | 4_peak_1007_lociStitched   | 6673  | 651 chr10:103728586-103729192 | C10ORF76  | NM_024541    | 79505 HPS6       | NM_024747    | -88697  |
| chr9:95821556-95827235    | 1_peak_27714_lociStitched  | 5680  | 652 chr9:95823903-95824897    | SUSD3     | NM_001287007 | 3425 C9ORF89     | NM_032310    | -34055  |
| chr6:37117947-37145071    | 6_peak_23310_lociStitched  | 6886  | 653 chr6:37123180-37123834    | PIM1      | NM_002648    | -6413 TMEM217    | NM_145316    | 93904   |
| chr19:8256519-8261523     | 4_peak_10063_lociStitched  | 4095  | 654 chr19:8258091-8259758     | CERS4     | NM_024552    | -15196 FBN3      | NM_032447    | -46636  |
| chr1:150583148-150594950  | 2_peak_12625_lociStitched  | 4476  | 655 chr1:150585839-150586236  | ENSA      | NM_207046    | 12560 MCL1       | NM_182763    | -36835  |

**Supplementary Table 2.** Genes differentially expressed in *Crebbp*<sup>fl/fl</sup> vs *Crebbp*<sup>+/-</sup> GC B cells (P ≤ 0.05, FC ≥ 1.2)

| Gene Symbol                                                          | Probe ID     | P-value* | Log2 Fold Change | KO mean | WT mean | FDR  | Z-score | Fold change |
|----------------------------------------------------------------------|--------------|----------|------------------|---------|---------|------|---------|-------------|
| <b>Downregulated in <i>Crebbp</i><sup>fl/fl</sup> <i>Cy1-Cre</i></b> |              |          |                  |         |         |      |         |             |
| Crebbp                                                               | 1436983_at   | 0.0000   | -0.87            | 9.42    | 10.29   | 0.04 | -5.57   | 0.5471      |
| Nfkbil1                                                              | 1449951_at   | 0.0000   | -0.31            | 9.30    | 9.62    | 0.08 | -4.37   | 0.8057      |
| H2-Ab1                                                               | 1425477_x_at | 0.0000   | -0.32            | 11.64   | 11.95   | 0.08 | -3.93   | 0.8022      |
| Shcbp1l                                                              | 1429324_at   | 0.0000   | -0.40            | 8.64    | 9.03    | 0.09 | -3.39   | 0.7600      |
| Napsa                                                                | 1423590_at   | 0.0001   | -0.46            | 10.84   | 11.31   | 0.09 | -3.85   | 0.7258      |
| Cacna1s                                                              | 1420442_at   | 0.0001   | -0.67            | 8.31    | 8.98    | 0.09 | -3.58   | 0.6282      |
| Hcls1                                                                | 1418842_at   | 0.0001   | -0.39            | 10.80   | 11.19   | 0.09 | -3.22   | 0.7642      |
| Sept9                                                                | 1417038_at   | 0.0001   | -0.34            | 9.79    | 10.13   | 0.09 | -4.36   | 0.7903      |
| Ehd4                                                                 | 1449852_a_at | 0.0001   | -0.27            | 11.67   | 11.95   | 0.09 | -3.13   | 0.8273      |
| Nfatc2                                                               | 1439205_at   | 0.0001   | -0.40            | 10.43   | 10.83   | 0.09 | -3.62   | 0.7556      |
| Camta1                                                               | 1433971_at   | 0.0001   | -1.51            | 5.27    | 6.78    | 0.09 | -3.87   | 0.3508      |
| Evl                                                                  | 1450106_a_at | 0.0001   | -0.52            | 10.31   | 10.83   | 0.09 | -3.04   | 0.6976      |
| Gltscr2                                                              | 1451121_a_at | 0.0001   | -0.31            | 11.63   | 11.94   | 0.09 | -2.86   | 0.8089      |
| Tktl1                                                                | 1449567_at   | 0.0001   | -1.25            | 5.38    | 6.63    | 0.09 | -4.81   | 0.4197      |
| Dyrk3                                                                | 1424229_at   | 0.0002   | -0.51            | 7.77    | 8.28    | 0.09 | -2.94   | 0.7031      |
| BC028528                                                             | 1427996_at   | 0.0002   | -0.59            | 10.18   | 10.77   | 0.09 | -3.83   | 0.6663      |
| Gm9835                                                               | 1419194_s_at | 0.0002   | -0.56            | 11.97   | 12.53   | 0.09 | -3.10   | 0.6800      |
| Gmfg                                                                 | 1419194_s_at | 0.0002   | -0.56            | 11.97   | 12.53   | 0.09 | -3.10   | 0.6800      |
| Crlf2                                                                | 1418097_a_at | 0.0002   | -0.58            | 9.03    | 9.60    | 0.10 | -2.72   | 0.6699      |
| Ppan                                                                 | 1423703_at   | 0.0002   | -0.32            | 10.63   | 10.95   | 0.10 | -2.72   | 0.8036      |
| Prrg1                                                                | 1431484_at   | 0.0002   | -0.67            | 4.32    | 4.98    | 0.10 | -2.80   | 0.6301      |
| Rab4b                                                                | 1451643_a_at | 0.0002   | -0.46            | 10.81   | 11.27   | 0.10 | -2.69   | 0.7275      |
| Tnfaip8l2                                                            | 1452948_at   | 0.0002   | -0.47            | 9.85    | 10.31   | 0.10 | -3.45   | 0.7234      |
| BC021614                                                             | 1424953_at   | 0.0003   | -0.40            | 7.26    | 7.66    | 0.10 | -2.64   | 0.7589      |
| Armcx5                                                               | 1424481_s_at | 0.0003   | -0.34            | 6.85    | 7.19    | 0.11 | -2.52   | 0.7896      |
| Hexa                                                                 | 1449024_a_at | 0.0003   | -0.52            | 10.21   | 10.73   | 0.11 | -3.36   | 0.6982      |
| Cd82                                                                 | 1416401_at   | 0.0003   | -0.34            | 10.20   | 10.54   | 0.11 | -4.02   | 0.7883      |
| AB124611                                                             | 1438475_at   | 0.0003   | -0.27            | 10.52   | 10.79   | 0.11 | -2.46   | 0.8306      |
| Ece1                                                                 | 1455741_a_at | 0.0003   | -0.32            | 8.10    | 8.41    | 0.11 | -3.51   | 0.8035      |
| Gm7609                                                               | 1422140_at   | 0.0003   | -0.64            | 8.50    | 9.14    | 0.11 | -2.45   | 0.6431      |
| Btnl2                                                                | 1442199_at   | 0.0003   | -0.70            | 9.43    | 10.13   | 0.11 | -2.81   | 0.6161      |
| LOC100862597                                                         | 1442199_at   | 0.0003   | -0.70            | 9.43    | 10.13   | 0.11 | -2.81   | 0.6161      |
| Nsmaf                                                                | 1416412_at   | 0.0004   | -0.40            | 10.79   | 11.19   | 0.11 | -2.85   | 0.7578      |
| Fyn                                                                  | 1417558_at   | 0.0004   | -0.62            | 9.40    | 10.01   | 0.11 | -2.55   | 0.6522      |
| Cnpy3                                                                | 1426479_a_at | 0.0004   | -0.32            | 9.40    | 9.72    | 0.11 | -2.54   | 0.8014      |
| Cpne5                                                                | 1442166_at   | 0.0004   | -0.40            | 10.19   | 10.59   | 0.11 | -2.40   | 0.7566      |
| Rab37                                                                | 1450167_at   | 0.0004   | -0.71            | 6.63    | 7.34    | 0.11 | -2.39   | 0.6115      |
| Abhd6                                                                | 1419103_a_at | 0.0004   | -0.37            | 8.23    | 8.60    | 0.11 | -2.70   | 0.7755      |
| Hs3st1                                                               | 1423450_a_at | 0.0004   | -0.95            | 6.82    | 7.78    | 0.11 | -2.79   | 0.5161      |
| Wdfy4                                                                | 1435582_at   | 0.0004   | -0.29            | 11.69   | 11.98   | 0.11 | -2.37   | 0.8204      |
| Tspyl5                                                               | 1455807_at   | 0.0005   | -1.84            | 4.78    | 6.62    | 0.12 | -3.05   | 0.2801      |
| Ifnlr1                                                               | 1460598_at   | 0.0005   | -0.95            | 6.88    | 7.83    | 0.12 | -2.75   | 0.5172      |
| Echdc3                                                               | 1418862_at   | 0.0005   | -0.64            | 7.76    | 8.39    | 0.12 | -2.37   | 0.6430      |
| Cxxc5                                                                | 1448960_at   | 0.0005   | -0.40            | 10.59   | 10.99   | 0.12 | -2.35   | 0.7574      |
| Ddx25                                                                | 1418263_at   | 0.0005   | -0.93            | 8.39    | 9.32    | 0.12 | -3.23   | 0.5239      |
| Susd1                                                                | 1458245_at   | 0.0005   | -0.42            | 9.07    | 9.49    | 0.12 | -2.35   | 0.7451      |
| Fermt3                                                               | 1433963_a_at | 0.0005   | -0.35            | 11.22   | 11.57   | 0.12 | -4.53   | 0.7847      |
| Spns3                                                                | 1429140_at   | 0.0005   | -0.52            | 8.44    | 8.96    | 0.12 | -2.28   | 0.6969      |
| Pdlim2                                                               | 1423946_at   | 0.0006   | -0.66            | 9.13    | 9.79    | 0.12 | -3.71   | 0.6348      |
| Il2rb                                                                | 1448759_at   | 0.0006   | -0.83            | 6.01    | 6.84    | 0.12 | -2.61   | 0.5640      |
| Lat                                                                  | 1460651_at   | 0.0006   | -0.49            | 7.16    | 7.65    | 0.12 | -2.30   | 0.7129      |
| Rgs2                                                                 | 1419248_at   | 0.0006   | -0.36            | 11.68   | 12.05   | 0.12 | -2.29   | 0.7786      |
| Ebi3                                                                 | 1449222_at   | 0.0006   | -0.68            | 8.62    | 9.30    | 0.12 | -2.36   | 0.6241      |
| Hao                                                                  | 1432492_a_at | 0.0006   | -0.57            | 10.94   | 11.51   | 0.12 | -2.23   | 0.6739      |
| Bin1                                                                 | 1425532_a_at | 0.0006   | -0.51            | 9.92    | 10.43   | 0.12 | -2.28   | 0.7014      |
| H2-Q7                                                                | 1418536_at   | 0.0006   | -0.47            | 10.79   | 11.26   | 0.12 | -2.23   | 0.7196      |
| H2-Q9                                                                | 1418536_at   | 0.0006   | -0.47            | 10.79   | 11.26   | 0.12 | -2.23   | 0.7196      |
| Psd2                                                                 | 1428268_at   | 0.0007   | -0.90            | 5.05    | 5.95    | 0.13 | -2.17   | 0.5340      |
| Bcl2a1a                                                              | 1419004_s_at | 0.0007   | -0.39            | 12.51   | 12.90   | 0.13 | -2.60   | 0.7647      |
| Bcl2a1b                                                              | 1419004_s_at | 0.0007   | -0.39            | 12.51   | 12.90   | 0.13 | -2.60   | 0.7647      |
| Bcl2a1d                                                              | 1419004_s_at | 0.0007   | -0.39            | 12.51   | 12.90   | 0.13 | -2.60   | 0.7647      |
| Slc12a3                                                              | 1422856_at   | 0.0007   | -0.67            | 5.90    | 6.58    | 0.13 | -2.30   | 0.6268      |
| Psen2                                                                | 1425869_a_at | 0.0007   | -0.53            | 9.41    | 9.94    | 0.13 | -2.17   | 0.6913      |

|               |              |        |       |       |       |      |       |        |
|---------------|--------------|--------|-------|-------|-------|------|-------|--------|
| Fam167a       | 1455872_at   | 0.0008 | -0.84 | 6.24  | 7.08  | 0.13 | -3.03 | 0.5571 |
| lqce          | 1434622_at   | 0.0008 | -0.63 | 8.35  | 8.98  | 0.13 | -2.42 | 0.6463 |
| Palm          | 1423967_at   | 0.0008 | -0.58 | 8.16  | 8.73  | 0.13 | -2.75 | 0.6694 |
| Krt222        | 1434535_at   | 0.0008 | -0.63 | 9.75  | 10.38 | 0.13 | -2.13 | 0.6465 |
| Sh2d1b1       | 1423024_at   | 0.0008 | -0.94 | 6.91  | 7.85  | 0.13 | -2.16 | 0.5218 |
| Sh2d1b2       | 1423024_at   | 0.0008 | -0.94 | 6.91  | 7.85  | 0.13 | -2.16 | 0.5218 |
| Arid3b        | 1423526_at   | 0.0009 | -0.49 | 9.47  | 9.95  | 0.13 | -2.18 | 0.7142 |
| Aldh3b1       | 1452301_at   | 0.0009 | -0.38 | 7.79  | 8.17  | 0.13 | -3.48 | 0.7694 |
| Ubxn11        | 1426105_a_at | 0.0009 | -0.66 | 8.10  | 8.76  | 0.13 | -2.22 | 0.6324 |
| Ptms          | 1428707_at   | 0.0010 | -0.52 | 7.28  | 7.79  | 0.13 | -2.07 | 0.6981 |
| Ppp1r18       | 1431299_a_at | 0.0010 | -0.28 | 11.01 | 11.29 | 0.14 | -2.22 | 0.8240 |
| Pxk           | 1451253_at   | 0.0010 | -0.37 | 10.00 | 10.36 | 0.14 | -2.08 | 0.7756 |
| 1700029M20Rik | 1453154_at   | 0.0011 | -0.90 | 5.75  | 6.65  | 0.14 | -2.48 | 0.5364 |
| Nek8          | 1450337_a_at | 0.0011 | -0.52 | 7.76  | 8.28  | 0.14 | -2.33 | 0.6957 |
| Slamf1        | 1425571_at   | 0.0011 | -0.27 | 8.50  | 8.77  | 0.14 | -2.03 | 0.8292 |
| Gm15821       | 1453936_at   | 0.0011 | -0.45 | 6.23  | 6.68  | 0.14 | -2.57 | 0.7304 |
| Jmjd1c        | 1426900_at   | 0.0011 | -0.28 | 11.13 | 11.40 | 0.14 | -2.10 | 0.8262 |
| Cd40          | 1460415_a_at | 0.0011 | -0.52 | 9.86  | 10.38 | 0.14 | -2.61 | 0.6982 |
| Kptn          | 1423438_at   | 0.0011 | -0.36 | 8.68  | 9.05  | 0.14 | -2.01 | 0.7770 |
| Xrn2          | 1450777_at   | 0.0012 | -0.38 | 10.66 | 11.03 | 0.14 | -3.77 | 0.7711 |
| Cyp4f18       | 1419219_at   | 0.0012 | -0.49 | 9.58  | 10.06 | 0.14 | -1.99 | 0.7144 |
| Trbv13-2      | 1427628_at   | 0.0012 | -0.37 | 4.21  | 4.58  | 0.15 | -2.18 | 0.7729 |
| Aim1l         | 1437813_at   | 0.0012 | -0.44 | 7.18  | 7.62  | 0.15 | -1.99 | 0.7379 |
| Lsp1          | 1417756_a_at | 0.0012 | -0.34 | 11.39 | 11.73 | 0.15 | -2.08 | 0.7880 |
| 5031439G07Rik | 1435745_at   | 0.0013 | -0.27 | 11.58 | 11.85 | 0.15 | -2.22 | 0.8317 |
| Sh2d2a        | 1449105_at   | 0.0013 | -0.56 | 7.06  | 7.61  | 0.15 | -2.48 | 0.6805 |
| Kif26b        | 1440990_at   | 0.0013 | -0.40 | 5.32  | 5.72  | 0.15 | -2.06 | 0.7572 |
| Myadm         | 1439389_s_at | 0.0013 | -0.42 | 10.49 | 10.91 | 0.15 | -2.19 | 0.7455 |
| Ciita         | 1421210_at   | 0.0013 | -0.47 | 8.88  | 9.35  | 0.15 | -1.99 | 0.7205 |
| Ccdc162       | 1445787_at   | 0.0013 | -0.31 | 4.84  | 5.14  | 0.15 | -2.03 | 0.8093 |
| Nfic          | 1429148_at   | 0.0013 | -0.36 | 6.79  | 7.15  | 0.15 | -2.25 | 0.7817 |
| Egr2          | 1427683_at   | 0.0014 | -0.40 | 9.49  | 9.89  | 0.15 | -2.39 | 0.7561 |
| Kcnq5         | 1457587_at   | 0.0014 | -0.31 | 10.49 | 10.80 | 0.16 | -2.27 | 0.8091 |
| St8sia6       | 1438566_at   | 0.0014 | -0.40 | 7.73  | 8.14  | 0.16 | -1.93 | 0.7555 |
| ltprip        | 1433943_at   | 0.0014 | -0.36 | 10.03 | 10.38 | 0.16 | -1.95 | 0.7807 |
| H2-DMa        | 1422527_at   | 0.0015 | -0.37 | 12.46 | 12.82 | 0.16 | -2.02 | 0.7746 |
| Dkk1l         | 1417787_at   | 0.0015 | -0.60 | 7.97  | 8.57  | 0.16 | -2.00 | 0.6598 |
| Tgfb3         | 1417455_at   | 0.0015 | -0.91 | 5.28  | 6.19  | 0.16 | -2.09 | 0.5334 |
| Tmem51        | 1424383_at   | 0.0015 | -1.09 | 7.23  | 8.32  | 0.16 | -1.92 | 0.4699 |
| M1ap          | 1449358_at   | 0.0016 | -0.40 | 7.29  | 7.69  | 0.16 | -1.91 | 0.7594 |
| Rab30         | 1426452_a_at | 0.0016 | -0.30 | 11.20 | 11.50 | 0.16 | -1.91 | 0.8115 |
| Zbtb4         | 1429722_at   | 0.0016 | -0.33 | 10.19 | 10.52 | 0.16 | -2.45 | 0.7957 |
| S1pr3         | 1437173_at   | 0.0016 | -0.40 | 10.10 | 10.50 | 0.16 | -2.07 | 0.7564 |
| Dnm3          | 1425403_at   | 0.0016 | -0.57 | 5.81  | 6.38  | 0.16 | -2.04 | 0.6729 |
| 4922502D21Rik | 1455808_at   | 0.0017 | -0.75 | 5.27  | 6.02  | 0.16 | -2.06 | 0.5947 |
| Ethe1         | 1417203_at   | 0.0017 | -0.58 | 8.69  | 9.27  | 0.16 | -2.14 | 0.6712 |
| Fam221a       | 1434428_at   | 0.0017 | -0.44 | 8.37  | 8.81  | 0.16 | -2.67 | 0.7389 |
| Dnajc10       | 1452230_at   | 0.0018 | -0.29 | 9.88  | 10.17 | 0.17 | -2.55 | 0.8180 |
| Prr5          | 1451463_at   | 0.0018 | -0.30 | 9.85  | 10.15 | 0.17 | -1.89 | 0.8143 |
| Ryr1          | 1427306_at   | 0.0018 | -1.00 | 10.33 | 11.33 | 0.17 | -1.90 | 0.5013 |
| Cyth4         | 1460437_at   | 0.0018 | -0.50 | 8.21  | 8.71  | 0.17 | -1.97 | 0.7077 |
| Ncf1          | 1425609_at   | 0.0018 | -0.58 | 6.06  | 6.65  | 0.17 | -2.52 | 0.6676 |
| 1700024h08rik | 1431333_at   | 0.0018 | -0.45 | 5.64  | 6.08  | 0.17 | -1.95 | 0.7334 |
| Elk3          | 1435143_at   | 0.0018 | -0.32 | 9.25  | 9.57  | 0.17 | -2.08 | 0.8018 |
| 4930415F15Rik | 1430044_at   | 0.0018 | -0.30 | 5.88  | 6.18  | 0.17 | -1.94 | 0.8146 |
| 9430038l01Rik | 1453799_at   | 0.0018 | -0.32 | 7.85  | 8.17  | 0.17 | -1.89 | 0.8023 |
| Arhgap39      | 1447521_x_at | 0.0018 | -0.40 | 9.49  | 9.90  | 0.17 | -1.84 | 0.7561 |
| Tcea3         | 1424531_a_at | 0.0020 | -0.47 | 6.33  | 6.80  | 0.18 | -2.13 | 0.7221 |
| Ccdc101       | 1451167_at   | 0.0020 | -0.40 | 10.09 | 10.49 | 0.18 | -2.27 | 0.7569 |
| Plekho2       | 1427103_at   | 0.0021 | -0.38 | 8.45  | 8.82  | 0.18 | -1.80 | 0.7699 |
| Jarid2        | 1422698_s_at | 0.0021 | -0.46 | 10.30 | 10.76 | 0.18 | -1.94 | 0.7277 |
| Pkn3          | 1434525_at   | 0.0021 | -0.27 | 7.45  | 7.72  | 0.18 | -1.79 | 0.8313 |
| Ccdc69        | 1419985_s_at | 0.0021 | -0.35 | 9.60  | 9.96  | 0.18 | -1.79 | 0.7837 |
| Slc2a6        | 1434015_at   | 0.0022 | -0.69 | 8.14  | 8.83  | 0.18 | -1.89 | 0.6181 |
| H2-M3         | 1421358_at   | 0.0022 | -0.68 | 10.45 | 11.13 | 0.18 | -2.27 | 0.6242 |
| Yif1b         | 1428445_at   | 0.0022 | -0.31 | 8.65  | 8.95  | 0.18 | -2.05 | 0.8070 |
| Odc1          | 1438761_a_at | 0.0022 | -0.34 | 11.93 | 12.27 | 0.18 | -2.13 | 0.7903 |

|               |              |        |       |       |       |      |       |        |
|---------------|--------------|--------|-------|-------|-------|------|-------|--------|
| Crisp3        | 1449838_at   | 0.0022 | -1.48 | 6.47  | 7.95  | 0.18 | -1.88 | 0.3586 |
| Chd5          | 1436095_at   | 0.0022 | -0.43 | 5.70  | 6.13  | 0.18 | -2.22 | 0.7411 |
| Slfn2         | 1450165_at   | 0.0022 | -0.46 | 10.22 | 10.68 | 0.18 | -1.89 | 0.7274 |
| Coro7         | 1428150_at   | 0.0022 | -0.44 | 7.92  | 8.36  | 0.18 | -1.79 | 0.7348 |
| Gm14085       | 1450639_at   | 0.0022 | -0.29 | 11.37 | 11.66 | 0.18 | -1.78 | 0.8185 |
| Slc28a2       | 1450639_at   | 0.0022 | -0.29 | 11.37 | 11.66 | 0.18 | -1.78 | 0.8185 |
| Il2rg         | 1416296_at   | 0.0023 | -0.45 | 10.54 | 10.99 | 0.18 | -1.91 | 0.7336 |
| 2900006B11Rik | 1430253_at   | 0.0023 | -0.34 | 5.43  | 5.77  | 0.18 | -1.77 | 0.7875 |
| Trabd2b       | 1443939_at   | 0.0023 | -0.54 | 7.00  | 7.55  | 0.18 | -2.17 | 0.6864 |
| Stt3b         | 1426343_at   | 0.0023 | -0.29 | 10.73 | 11.02 | 0.18 | -1.78 | 0.8202 |
| Use1          | 1451130_at   | 0.0023 | -0.27 | 11.90 | 12.18 | 0.18 | -2.52 | 0.8266 |
| Ighm          | 1427851_x_at | 0.0023 | -0.56 | 4.74  | 5.30  | 0.18 | -1.78 | 0.6766 |
| Unc93b1       | 1423768_at   | 0.0024 | -0.36 | 9.48  | 9.83  | 0.18 | -1.78 | 0.7815 |
| Pecam1        | 1421287_a_at | 0.0024 | -0.55 | 7.68  | 8.23  | 0.18 | -1.91 | 0.6827 |
| Sepr1         | 1426680_at   | 0.0025 | -0.57 | 6.76  | 7.33  | 0.18 | -1.88 | 0.6756 |
| Gch1          | 1420499_at   | 0.0025 | -0.59 | 6.22  | 6.82  | 0.18 | -2.31 | 0.6622 |
| Sept1         | 1449898_at   | 0.0025 | -0.36 | 10.19 | 10.55 | 0.18 | -1.90 | 0.7770 |
| Muc1          | 1449199_at   | 0.0025 | -0.36 | 6.20  | 6.56  | 0.18 | -1.77 | 0.7786 |
| Dll1          | 1419204_at   | 0.0025 | -0.33 | 6.27  | 6.60  | 0.18 | -1.78 | 0.7967 |
| Ass1          | 1416239_at   | 0.0026 | -0.76 | 6.89  | 7.65  | 0.19 | -1.99 | 0.5911 |
| Npr2          | 1427191_at   | 0.0026 | -0.52 | 5.64  | 6.16  | 0.19 | -2.32 | 0.6993 |
| Ccdc175       | 1456101_at   | 0.0027 | -1.19 | 8.43  | 9.62  | 0.19 | -2.30 | 0.4371 |
| Tespa1        | 1428959_at   | 0.0027 | -0.64 | 9.50  | 10.14 | 0.19 | -2.20 | 0.6433 |
| Ezr           | 1450850_at   | 0.0028 | -0.28 | 11.16 | 11.44 | 0.19 | -1.84 | 0.8262 |
| Kif9          | 1420395_a_at | 0.0028 | -0.41 | 6.94  | 7.35  | 0.19 | -1.70 | 0.7542 |
| Lrrc56        | 1427890_a_at | 0.0029 | -0.65 | 8.91  | 9.57  | 0.19 | -1.96 | 0.6353 |
| Nudt14        | 1424753_at   | 0.0030 | -0.45 | 9.48  | 9.92  | 0.19 | -2.09 | 0.7332 |
| 4933406P04Rik | 1430093_at   | 0.0030 | -0.52 | 5.62  | 6.13  | 0.19 | -1.70 | 0.6998 |
| Ublcp1        | 1415789_a_at | 0.0030 | -0.31 | 9.03  | 9.34  | 0.20 | -2.04 | 0.8050 |
| Syne1         | 1455493_at   | 0.0032 | -0.52 | 8.98  | 9.50  | 0.20 | -1.76 | 0.6980 |
| Nr4a1         | 1416505_at   | 0.0032 | -0.78 | 6.22  | 7.01  | 0.20 | -2.25 | 0.5811 |
| Grap          | 1429387_at   | 0.0032 | -0.42 | 10.23 | 10.65 | 0.20 | -1.84 | 0.7451 |
| Gm9564        | 1458687_at   | 0.0032 | -0.93 | 9.12  | 10.05 | 0.20 | -2.31 | 0.5246 |
| Cpe           | 1415949_at   | 0.0032 | -1.16 | 4.74  | 5.90  | 0.20 | -1.71 | 0.4471 |
| Sapcd1        | 1422952_at   | 0.0033 | -0.71 | 7.47  | 8.18  | 0.20 | -2.82 | 0.6098 |
| LOC100504863  | 1448398_s_at | 0.0033 | -0.35 | 9.62  | 9.97  | 0.20 | -1.65 | 0.7846 |
| Rpl22         | 1448398_s_at | 0.0033 | -0.35 | 9.62  | 9.97  | 0.20 | -1.65 | 0.7846 |
| Trio          | 1442751_at   | 0.0034 | -0.47 | 5.06  | 5.53  | 0.21 | -1.64 | 0.7206 |
| Dkk4          | 1425447_at   | 0.0034 | -0.44 | 6.00  | 6.44  | 0.21 | -1.72 | 0.7393 |
| LOC101055731  | 1425787_a_at | 0.0035 | -0.68 | 5.70  | 6.37  | 0.21 | -2.23 | 0.6258 |
| LOC101055745  | 1425787_a_at | 0.0035 | -0.68 | 5.70  | 6.37  | 0.21 | -2.23 | 0.6258 |
| Sytl3         | 1425787_a_at | 0.0035 | -0.68 | 5.70  | 6.37  | 0.21 | -2.23 | 0.6258 |
| Pqbp1         | 1417731_at   | 0.0035 | -0.30 | 11.34 | 11.64 | 0.21 | -1.69 | 0.8128 |
| Trim7         | 1425743_at   | 0.0036 | -0.43 | 6.28  | 6.72  | 0.21 | -1.67 | 0.7399 |
| Tnni2         | 1416889_at   | 0.0036 | -0.45 | 8.74  | 9.19  | 0.21 | -1.67 | 0.7321 |
| Flna          | 1426677_at   | 0.0036 | -0.43 | 9.99  | 10.41 | 0.21 | -1.63 | 0.7437 |
| Pear1         | 1425268_a_at | 0.0036 | -0.49 | 8.12  | 8.61  | 0.21 | -1.63 | 0.7110 |
| E330009J07Rik | 1449056_at   | 0.0037 | -0.64 | 9.54  | 10.18 | 0.21 | -1.80 | 0.6419 |
| Pygl          | 1417741_at   | 0.0037 | -0.36 | 4.82  | 5.18  | 0.21 | -1.97 | 0.7767 |
| Padi2         | 1418252_at   | 0.0037 | -0.90 | 9.86  | 10.76 | 0.21 | -1.78 | 0.5349 |
| Stk17b        | 1423452_at   | 0.0038 | -0.29 | 11.35 | 11.65 | 0.21 | -2.17 | 0.8171 |
| Ahcyl2        | 1452703_at   | 0.0038 | -0.34 | 9.56  | 9.91  | 0.21 | -1.68 | 0.7874 |
| Ret           | 1436359_at   | 0.0038 | -0.75 | 7.24  | 7.98  | 0.21 | -1.61 | 0.5966 |
| Ssbp4         | 1449511_a_at | 0.0038 | -0.27 | 8.01  | 8.28  | 0.21 | -1.62 | 0.8266 |
| Kcnj11        | 1450515_at   | 0.0039 | -0.31 | 5.90  | 6.21  | 0.21 | -1.61 | 0.8043 |
| Acy3          | 1448539_a_at | 0.0039 | -0.35 | 5.13  | 5.48  | 0.21 | -1.69 | 0.7837 |
| Tap2          | 1453913_a_at | 0.0039 | -0.29 | 9.55  | 9.85  | 0.21 | -1.63 | 0.8155 |
| Mta3          | 1421402_at   | 0.0039 | -0.39 | 10.15 | 10.54 | 0.21 | -1.60 | 0.7616 |
| Strada        | 1428188_at   | 0.0039 | -0.33 | 9.66  | 9.98  | 0.21 | -1.98 | 0.7982 |
| Cd99          | 1453556_x_at | 0.0039 | -0.30 | 8.88  | 9.18  | 0.21 | -1.75 | 0.8144 |
| Lck           | 1425396_a_at | 0.0040 | -0.70 | 9.80  | 10.50 | 0.21 | -1.75 | 0.6165 |
| Sema7a        | 1459903_at   | 0.0040 | -0.40 | 10.49 | 10.88 | 0.21 | -1.64 | 0.7601 |
| Thada         | 1457106_at   | 0.0040 | -0.41 | 7.87  | 8.28  | 0.21 | -2.04 | 0.7540 |
| Cd5           | 1418353_at   | 0.0040 | -0.44 | 5.17  | 5.61  | 0.21 | -1.81 | 0.7357 |
| Igf2bp2       | 1437103_at   | 0.0041 | -0.47 | 6.47  | 6.94  | 0.22 | -1.59 | 0.7215 |
| Abi3          | 1452928_at   | 0.0041 | -0.33 | 10.36 | 10.69 | 0.22 | -1.82 | 0.7956 |
| Tpm2          | 1425028_a_at | 0.0041 | -0.80 | 4.71  | 5.51  | 0.22 | -1.59 | 0.5756 |

|               |              |        |       |       |       |      |       |        |
|---------------|--------------|--------|-------|-------|-------|------|-------|--------|
| Tubg2         | 1449318_at   | 0.0041 | -0.83 | 4.92  | 5.75  | 0.22 | -1.99 | 0.5632 |
| Cd69          | 1428735_at   | 0.0042 | -0.53 | 9.80  | 10.33 | 0.22 | -1.61 | 0.6939 |
| Hemgn         | 1418199_at   | 0.0042 | -1.00 | 8.38  | 9.38  | 0.22 | -2.42 | 0.4988 |
| Rab31         | 1416165_at   | 0.0042 | -0.31 | 9.29  | 9.61  | 0.22 | -1.59 | 0.8044 |
| 1810043G02Rik | 1424267_at   | 0.0042 | -0.30 | 7.90  | 8.20  | 0.22 | -2.09 | 0.8147 |
| Cd164         | 1431527_at   | 0.0043 | -0.36 | 6.28  | 6.65  | 0.22 | -1.71 | 0.7790 |
| Baiap2        | 1435128_at   | 0.0043 | -0.32 | 6.36  | 6.67  | 0.22 | -2.01 | 0.8014 |
| Parvg         | 1416875_at   | 0.0043 | -0.28 | 10.41 | 10.69 | 0.22 | -1.76 | 0.8229 |
| Atrip         | 1450672_a_at | 0.0043 | -0.30 | 9.57  | 9.86  | 0.22 | -1.90 | 0.8150 |
| Trex1         | 1450672_a_at | 0.0043 | -0.30 | 9.57  | 9.86  | 0.22 | -1.90 | 0.8150 |
| Myo1f         | 1421618_at   | 0.0043 | -0.49 | 7.13  | 7.62  | 0.22 | -1.59 | 0.7144 |
| Cd180         | 1421547_at   | 0.0044 | -0.31 | 10.88 | 11.19 | 0.22 | -2.03 | 0.8063 |
| Mpg           | 1417571_at   | 0.0044 | -0.32 | 8.63  | 8.95  | 0.22 | -1.56 | 0.7992 |
| Kdm4a         | 1435340_at   | 0.0045 | -0.28 | 9.34  | 9.62  | 0.22 | -1.56 | 0.8255 |
| Fnbp1         | 1426983_at   | 0.0045 | -0.27 | 12.26 | 12.53 | 0.22 | -1.66 | 0.8283 |
| Vps8          | 1434050_at   | 0.0045 | -0.39 | 7.31  | 7.69  | 0.22 | -1.56 | 0.7654 |
| Cbx4          | 1440479_at   | 0.0048 | -0.34 | 6.07  | 6.41  | 0.23 | -1.59 | 0.7906 |
| Cryz          | 1438610_a_at | 0.0048 | -0.40 | 10.33 | 10.73 | 0.23 | -1.57 | 0.7554 |
| Orai2         | 1434763_at   | 0.0049 | -0.33 | 8.30  | 8.63  | 0.23 | -1.54 | 0.7936 |
| Pbx1          | 1428647_at   | 0.0049 | -0.62 | 6.05  | 6.67  | 0.23 | -1.85 | 0.6521 |
| Itk           | 1457120_at   | 0.0049 | -0.51 | 3.19  | 3.70  | 0.23 | -1.85 | 0.7035 |
| Grk6          | 1450480_a_at | 0.0052 | -0.35 | 7.24  | 7.59  | 0.24 | -1.52 | 0.7858 |
| C920025E04Rik | 1449556_at   | 0.0052 | -0.50 | 11.14 | 11.64 | 0.24 | -2.27 | 0.7086 |
| H2-T23        | 1449556_at   | 0.0052 | -0.50 | 11.14 | 11.64 | 0.24 | -2.27 | 0.7086 |
| 9630010G10Rik | 1460121_at   | 0.0052 | -0.46 | 7.49  | 7.95  | 0.24 | -1.53 | 0.7261 |
| Rgs9          | 1418691_at   | 0.0053 | -0.48 | 7.03  | 7.50  | 0.24 | -1.51 | 0.7183 |
| Card11        | 1435996_at   | 0.0053 | -0.39 | 9.62  | 10.01 | 0.24 | -1.51 | 0.7642 |
| Rapgef3       | 1424471_at   | 0.0054 | -0.48 | 7.64  | 8.12  | 0.24 | -1.54 | 0.7178 |
| Frat1         | 1449814_at   | 0.0054 | -0.34 | 9.23  | 9.57  | 0.24 | -1.52 | 0.7898 |
| 4930481A15Rik | 1436146_at   | 0.0055 | -0.41 | 6.07  | 6.48  | 0.24 | -1.60 | 0.7544 |
| Slc39a11      | 1424905_a_at | 0.0055 | -0.47 | 8.97  | 9.44  | 0.24 | -1.61 | 0.7229 |
| Gpr18         | 1439141_at   | 0.0055 | -0.29 | 11.09 | 11.38 | 0.24 | -1.50 | 0.8174 |
| Slc25a25      | 1424735_at   | 0.0055 | -0.39 | 6.97  | 7.36  | 0.24 | -1.56 | 0.7638 |
| 4833403J16Rik | 1429969_at   | 0.0056 | -0.35 | 8.14  | 8.49  | 0.24 | -1.54 | 0.7848 |
| Rftn2         | 1452946_a_at | 0.0056 | -0.45 | 7.33  | 7.78  | 0.24 | -1.51 | 0.7314 |
| Zyx           | 1438552_x_at | 0.0056 | -0.38 | 5.23  | 5.61  | 0.24 | -1.82 | 0.7682 |
| Zc3h12a       | 1427348_at   | 0.0057 | -0.34 | 9.13  | 9.47  | 0.24 | -1.72 | 0.7923 |
| Shisa5        | 1423986_a_at | 0.0057 | -0.36 | 10.68 | 11.04 | 0.25 | -1.74 | 0.7796 |
| Ffar2         | 1425216_at   | 0.0057 | -0.90 | 7.75  | 8.65  | 0.25 | -1.60 | 0.5342 |
| Phlda1        | 1418835_at   | 0.0057 | -0.32 | 8.13  | 8.46  | 0.25 | -1.51 | 0.7984 |
| Pde2a         | 1452202_at   | 0.0058 | -1.14 | 6.73  | 7.87  | 0.25 | -1.52 | 0.4544 |
| 4931428F04Rik | 1435024_at   | 0.0058 | -0.34 | 7.43  | 7.77  | 0.25 | -1.53 | 0.7903 |
| Frm4b         | 1426594_at   | 0.0060 | -0.31 | 5.04  | 5.35  | 0.25 | -1.50 | 0.8065 |
| Zbtb32        | 1432459_a_at | 0.0063 | -0.44 | 6.99  | 7.43  | 0.26 | -1.97 | 0.7383 |
| Endov         | 1437764_at   | 0.0064 | -0.39 | 5.08  | 5.47  | 0.26 | -1.48 | 0.7606 |
| Ptprs         | 1426794_at   | 0.0064 | -0.35 | 10.57 | 10.92 | 0.26 | -2.19 | 0.7831 |
| Txndc16       | 1427050_at   | 0.0064 | -0.33 | 10.94 | 11.26 | 0.26 | -1.45 | 0.7974 |
| Xrcc1         | 1416587_a_at | 0.0064 | -0.47 | 11.11 | 11.57 | 0.26 | -1.62 | 0.7237 |
| Abtb1         | 1417000_at   | 0.0065 | -0.41 | 8.80  | 9.21  | 0.26 | -2.21 | 0.7534 |
| Rps20         | 1421935_at   | 0.0066 | -0.30 | 7.98  | 8.28  | 0.26 | -1.45 | 0.8117 |
| Snx8          | 1454667_at   | 0.0066 | -0.28 | 11.82 | 12.11 | 0.26 | -1.44 | 0.8217 |
| Armc9         | 1435073_a_at | 0.0066 | -0.33 | 7.89  | 8.21  | 0.26 | -1.46 | 0.7981 |
| Smco2         | 1429675_at   | 0.0068 | -0.36 | 5.02  | 5.38  | 0.26 | -1.46 | 0.7783 |
| Pyhin1        | 1435330_at   | 0.0068 | -0.33 | 11.59 | 11.93 | 0.26 | -1.59 | 0.7932 |
| A430093F15Rik | 1444299_at   | 0.0068 | -0.69 | 4.66  | 5.34  | 0.26 | -1.57 | 0.6211 |
| 2410004P03Rik | 1431991_at   | 0.0068 | -0.35 | 6.14  | 6.49  | 0.26 | -1.58 | 0.7869 |
| Extl1         | 1423305_at   | 0.0070 | -0.44 | 7.36  | 7.80  | 0.27 | -1.45 | 0.7358 |
| Nron          | 1457187_at   | 0.0070 | -0.31 | 5.25  | 5.56  | 0.27 | -1.46 | 0.8065 |
| lqcg          | 1460467_at   | 0.0071 | -0.31 | 5.40  | 5.71  | 0.27 | -1.42 | 0.8084 |
| Arhgap8       | 1451320_at   | 0.0072 | -0.29 | 9.52  | 9.81  | 0.27 | -1.43 | 0.8174 |
| Ncan          | 1434679_at   | 0.0073 | -0.69 | 4.80  | 5.49  | 0.27 | -1.63 | 0.6218 |
| Ctsc          | 1437939_s_at | 0.0075 | -0.50 | 7.16  | 7.67  | 0.27 | -1.41 | 0.7063 |
| Rgs13         | 1442263_at   | 0.0076 | -0.61 | 11.20 | 11.81 | 0.27 | -2.05 | 0.6552 |
| Pdcd1lg2      | 1450290_at   | 0.0076 | -0.36 | 7.25  | 7.61  | 0.27 | -1.44 | 0.7806 |
| Creg1         | 1415948_at   | 0.0076 | -0.29 | 10.09 | 10.38 | 0.27 | -2.30 | 0.8160 |
| C030013C21Rik | 1444183_at   | 0.0076 | -0.29 | 5.12  | 5.41  | 0.27 | -1.57 | 0.8185 |
| Spp1          | 1449254_at   | 0.0078 | -0.39 | 3.59  | 3.97  | 0.28 | -1.39 | 0.7649 |

|               |              |        |       |       |       |      |       |        |
|---------------|--------------|--------|-------|-------|-------|------|-------|--------|
| Gm568         | 1428038_at   | 0.0078 | -0.78 | 5.74  | 6.52  | 0.28 | -1.46 | 0.5822 |
| Cystm1        | 1427878_at   | 0.0078 | -0.39 | 7.24  | 7.63  | 0.28 | -1.40 | 0.7622 |
| Chst10        | 1426620_at   | 0.0079 | -0.72 | 7.01  | 7.73  | 0.28 | -1.50 | 0.6074 |
| Gng12         | 1455089_at   | 0.0079 | -0.27 | 10.16 | 10.43 | 0.28 | -1.80 | 0.8319 |
| Pinlyp        | 1429835_at   | 0.0081 | -0.44 | 6.20  | 6.64  | 0.28 | -1.38 | 0.7363 |
| Sh3bp2        | 1448328_at   | 0.0082 | -0.52 | 9.24  | 9.76  | 0.28 | -1.89 | 0.6961 |
| Tspan32       | 1418398_a_at | 0.0083 | -0.58 | 8.57  | 9.15  | 0.28 | -1.44 | 0.6697 |
| Mrgpre        | 1438568_at   | 0.0084 | -0.62 | 7.06  | 7.69  | 0.29 | -1.60 | 0.6503 |
| Adck3         | 1417066_at   | 0.0084 | -0.47 | 8.23  | 8.70  | 0.29 | -1.39 | 0.7224 |
| Sreb12        | 1426744_at   | 0.0086 | -0.30 | 10.96 | 11.26 | 0.29 | -1.50 | 0.8129 |
| Ncf4          | 1418465_at   | 0.0086 | -0.29 | 11.20 | 11.48 | 0.29 | -1.97 | 0.8199 |
| Atf3          | 1449363_at   | 0.0087 | -0.54 | 6.10  | 6.64  | 0.29 | -1.52 | 0.6892 |
| Ltb           | 1419135_at   | 0.0089 | -0.35 | 10.53 | 10.87 | 0.29 | -1.39 | 0.7871 |
| Stk11ip       | 1431792_a_at | 0.0090 | -0.54 | 9.43  | 9.97  | 0.30 | -1.66 | 0.6891 |
| Gimap6        | 1427891_at   | 0.0091 | -0.27 | 11.39 | 11.67 | 0.30 | -1.68 | 0.8282 |
| Rexo1         | 1429489_at   | 0.0092 | -0.28 | 8.20  | 8.48  | 0.30 | -1.43 | 0.8263 |
| Gm19345       | 1441120_at   | 0.0092 | -0.40 | 7.18  | 7.59  | 0.30 | -1.65 | 0.7554 |
| Csf2rb        | 1421326_at   | 0.0092 | -0.89 | 7.29  | 8.18  | 0.30 | -1.36 | 0.5408 |
| Rarres1       | 1438055_at   | 0.0093 | -0.72 | 4.96  | 5.68  | 0.30 | -1.51 | 0.6060 |
| Hmgcs1        | 1441536_at   | 0.0093 | -0.39 | 8.48  | 8.87  | 0.30 | -1.56 | 0.7650 |
| Ppcdc         | 1430813_at   | 0.0093 | -0.29 | 5.20  | 5.49  | 0.30 | -1.39 | 0.8180 |
| Zfp961        | 1433390_at   | 0.0094 | -0.30 | 4.96  | 5.27  | 0.30 | -1.35 | 0.8114 |
| Cybb          | 1436779_at   | 0.0094 | -0.39 | 10.60 | 10.99 | 0.30 | -1.59 | 0.7650 |
| Lime1         | 1416869_x_at | 0.0094 | -0.32 | 8.82  | 9.14  | 0.30 | -1.34 | 0.8026 |
| Zgpat         | 1416869_x_at | 0.0094 | -0.32 | 8.82  | 9.14  | 0.30 | -1.34 | 0.8026 |
| Timm8a2       | 1447997_s_at | 0.0095 | -0.71 | 3.89  | 4.60  | 0.30 | -1.37 | 0.6113 |
| Dusp2         | 1450698_at   | 0.0096 | -0.27 | 10.57 | 10.84 | 0.30 | -1.43 | 0.8304 |
| Pfkp          | 1437759_at   | 0.0096 | -0.38 | 7.28  | 7.66  | 0.30 | -1.36 | 0.7674 |
| Akna          | 1452393_at   | 0.0097 | -0.63 | 9.56  | 10.19 | 0.30 | -1.46 | 0.6476 |
| 4921525O09Rik | 1429472_at   | 0.0097 | -0.30 | 6.31  | 6.61  | 0.30 | -1.40 | 0.8096 |
| Rnf167        | 1430527_a_at | 0.0099 | -0.29 | 10.22 | 10.51 | 0.30 | -1.95 | 0.8198 |
| Fcgr4         | 1425225_at   | 0.0099 | -0.58 | 6.38  | 6.96  | 0.30 | -1.33 | 0.6676 |
| Kcnq2         | 1420800_a_at | 0.0099 | -0.30 | 6.84  | 7.13  | 0.30 | -1.34 | 0.8139 |
| H2-Oa         | 1419297_at   | 0.0100 | -0.60 | 11.52 | 12.11 | 0.30 | -1.42 | 0.6616 |
| Dtx4          | 1455711_at   | 0.0100 | -0.47 | 5.14  | 5.62  | 0.30 | -1.43 | 0.7196 |
| Tm6sf1        | 1424443_at   | 0.0100 | -0.44 | 9.45  | 9.90  | 0.30 | -1.33 | 0.7353 |
| Prss55        | 1453316_at   | 0.0100 | -0.50 | 6.66  | 7.16  | 0.30 | -2.31 | 0.7073 |
| Clic4         | 1438606_a_at | 0.0101 | -0.27 | 11.52 | 11.79 | 0.30 | -1.38 | 0.8270 |
| Car13         | 1439620_at   | 0.0101 | -0.40 | 7.03  | 7.43  | 0.30 | -1.47 | 0.7559 |
| Aldh2         | 1448143_at   | 0.0101 | -0.27 | 12.06 | 12.33 | 0.30 | -1.46 | 0.8296 |
| Lcp2          | 1418641_at   | 0.0101 | -0.44 | 9.59  | 10.03 | 0.30 | -1.40 | 0.7349 |
| Cd22          | 1419769_at   | 0.0101 | -0.30 | 11.53 | 11.84 | 0.30 | -1.50 | 0.8097 |
| Traf1         | 1423602_at   | 0.0102 | -0.36 | 10.49 | 10.85 | 0.30 | -1.34 | 0.7795 |
| Myo18a        | 1451422_at   | 0.0102 | -0.36 | 9.12  | 9.48  | 0.30 | -1.33 | 0.7813 |
| Il4ra         | 1423996_a_at | 0.0103 | -0.36 | 8.35  | 8.71  | 0.31 | -1.40 | 0.7794 |
| Kcnn4         | 1421038_a_at | 0.0104 | -0.38 | 9.49  | 9.87  | 0.31 | -1.33 | 0.7706 |
| Fam71e1       | 1437710_x_at | 0.0105 | -0.59 | 5.27  | 5.86  | 0.31 | -1.36 | 0.6656 |
| Irf2bpl       | 1447815_x_at | 0.0105 | -0.35 | 3.76  | 4.10  | 0.31 | -1.33 | 0.7846 |
| St6galnac3    | 1420903_at   | 0.0106 | -0.30 | 4.93  | 5.23  | 0.31 | -1.35 | 0.8135 |
| Myo1e         | 1420159_at   | 0.0106 | -0.47 | 7.39  | 7.85  | 0.31 | -1.47 | 0.7242 |
| AA388235      | 1437441_at   | 0.0107 | -0.37 | 6.33  | 6.70  | 0.31 | -1.54 | 0.7737 |
| Ccr4          | 1421655_a_at | 0.0107 | -0.32 | 4.06  | 4.38  | 0.31 | -1.32 | 0.8031 |
| Bmf           | 1454880_s_at | 0.0107 | -0.47 | 7.71  | 8.18  | 0.31 | -1.49 | 0.7199 |
| Rnf157        | 1440400_at   | 0.0107 | -0.33 | 9.05  | 9.38  | 0.31 | -2.03 | 0.7945 |
| Serpinf1      | 1453724_a_at | 0.0108 | -0.34 | 6.00  | 6.35  | 0.31 | -1.31 | 0.7892 |
| Rgs3          | 1454026_a_at | 0.0109 | -0.27 | 5.38  | 5.66  | 0.31 | -1.87 | 0.8267 |
| Rassf2        | 1443998_at   | 0.0109 | -0.40 | 7.74  | 8.14  | 0.31 | -1.32 | 0.7584 |
| Gml           | 1422400_a_at | 0.0110 | -0.37 | 5.37  | 5.74  | 0.31 | -1.31 | 0.7734 |
| Hemt1         | 1422400_a_at | 0.0110 | -0.37 | 5.37  | 5.74  | 0.31 | -1.31 | 0.7734 |
| BC147527      | 1435840_x_at | 0.0112 | -0.44 | 6.54  | 6.97  | 0.31 | -1.37 | 0.7392 |
| Phf11d        | 1438868_at   | 0.0112 | -0.45 | 7.93  | 8.37  | 0.31 | -1.31 | 0.7346 |
| Snx29         | 1456922_at   | 0.0112 | -0.78 | 8.25  | 9.03  | 0.31 | -1.40 | 0.5820 |
| Itpr2         | 1444418_at   | 0.0112 | -0.50 | 6.59  | 7.09  | 0.31 | -1.59 | 0.7078 |
| Junb          | 1415899_at   | 0.0114 | -0.45 | 6.70  | 7.15  | 0.31 | -1.44 | 0.7308 |
| Msh5          | 1449537_at   | 0.0114 | -0.31 | 7.19  | 7.50  | 0.31 | -1.29 | 0.8084 |
| Cd59a         | 1418710_at   | 0.0114 | -0.53 | 8.90  | 9.42  | 0.31 | -1.30 | 0.6948 |
| Selplg        | 1449127_at   | 0.0115 | -0.47 | 7.47  | 7.94  | 0.31 | -1.51 | 0.7242 |

|               |              |        |       |       |       |      |       |        |
|---------------|--------------|--------|-------|-------|-------|------|-------|--------|
| Slc7a7        | 1417392_a_at | 0.0115 | -0.57 | 8.89  | 9.46  | 0.31 | -1.71 | 0.6713 |
| Gm9796        | 1443132_at   | 0.0115 | -0.27 | 4.54  | 4.81  | 0.31 | -1.49 | 0.8281 |
| A630023P12Rik | 1455370_at   | 0.0115 | -1.10 | 8.84  | 9.94  | 0.31 | -1.42 | 0.4670 |
| Gsn           | 1415812_at   | 0.0115 | -0.33 | 10.31 | 10.64 | 0.31 | -1.62 | 0.7956 |
| St3gal2       | 1421890_at   | 0.0115 | -0.28 | 6.65  | 6.93  | 0.31 | -1.39 | 0.8225 |
| Mical3        | 1439893_at   | 0.0116 | -0.76 | 8.53  | 9.30  | 0.31 | -1.33 | 0.5896 |
| Cyp27a1       | 1417590_at   | 0.0117 | -0.96 | 8.06  | 9.02  | 0.31 | -1.59 | 0.5144 |
| Spo11         | 1417021_a_at | 0.0118 | -0.71 | 5.47  | 6.18  | 0.31 | -1.34 | 0.6112 |
| Cenpb         | 1426051_a_at | 0.0118 | -0.28 | 6.57  | 6.85  | 0.31 | -1.28 | 0.8235 |
| Nr1h2         | 1416353_at   | 0.0119 | -0.34 | 8.58  | 8.92  | 0.31 | -1.28 | 0.7920 |
| Ak7           | 1430781_at   | 0.0120 | -0.65 | 8.59  | 9.24  | 0.31 | -1.57 | 0.6363 |
| Adra2b        | 1439645_at   | 0.0121 | -0.31 | 5.86  | 6.17  | 0.31 | -1.27 | 0.8049 |
| 2310015A10Rik | 1447255_at   | 0.0122 | -0.32 | 7.13  | 7.45  | 0.32 | -1.27 | 0.7985 |
| Ptp4a3        | 1418182_at   | 0.0122 | -0.37 | 5.88  | 6.25  | 0.32 | -1.76 | 0.7725 |
| Ccdc28b       | 1442678_at   | 0.0123 | -0.29 | 6.71  | 7.00  | 0.32 | -1.35 | 0.8167 |
| Cdk14         | 1419250_a_at | 0.0124 | -0.39 | 7.14  | 7.53  | 0.32 | -1.40 | 0.7646 |
| 4933404O12Rik | 1435827_at   | 0.0124 | -0.45 | 8.31  | 8.76  | 0.32 | -1.40 | 0.7345 |
| Tmem107       | 1429058_at   | 0.0126 | -0.39 | 8.98  | 9.37  | 0.32 | -1.42 | 0.7645 |
| Bbs2          | 1424478_at   | 0.0127 | -0.38 | 9.30  | 9.69  | 0.32 | -1.33 | 0.7666 |
| Bmyc          | 1428669_at   | 0.0127 | -0.37 | 10.27 | 10.64 | 0.32 | -1.31 | 0.7720 |
| Pdxk          | 1427930_at   | 0.0127 | -0.28 | 6.70  | 6.98  | 0.32 | -1.28 | 0.8243 |
| Gh            | 1460310_a_at | 0.0128 | -0.40 | 9.37  | 9.77  | 0.32 | -1.28 | 0.7584 |
| Ccbp2         | 1422112_at   | 0.0128 | -0.40 | 6.85  | 7.25  | 0.32 | -1.30 | 0.7554 |
| Plekhn3       | 1438108_at   | 0.0129 | -0.48 | 7.44  | 7.92  | 0.32 | -1.30 | 0.7175 |
| 1700009J07Rik | 1432505_at   | 0.0130 | -0.43 | 5.49  | 5.92  | 0.32 | -1.39 | 0.7431 |
| Map3k8        | 1419208_at   | 0.0130 | -0.57 | 7.53  | 8.10  | 0.32 | -1.35 | 0.6718 |
| Tvp23a        | 1435130_at   | 0.0130 | -0.39 | 6.78  | 7.17  | 0.32 | -1.32 | 0.7639 |
| Ccdc57        | 1429852_at   | 0.0131 | -0.40 | 5.26  | 5.66  | 0.32 | -1.48 | 0.7585 |
| Egr3          | 1436329_at   | 0.0131 | -0.61 | 9.09  | 9.70  | 0.32 | -1.88 | 0.6567 |
| Adat3         | 1450393_a_at | 0.0131 | -0.31 | 8.77  | 9.08  | 0.32 | -1.65 | 0.8091 |
| Scamp4        | 1450393_a_at | 0.0131 | -0.31 | 8.77  | 9.08  | 0.32 | -1.65 | 0.8091 |
| Hnrnpd        | 1458273_at   | 0.0132 | -0.30 | 7.31  | 7.62  | 0.32 | -1.30 | 0.8095 |
| Rnf122        | 1454857_at   | 0.0133 | -0.66 | 6.24  | 6.90  | 0.32 | -1.96 | 0.6340 |
| Tmem231       | 1456602_at   | 0.0133 | -0.79 | 7.89  | 8.68  | 0.32 | -1.49 | 0.5787 |
| Arhgap9       | 1419810_x_at | 0.0133 | -0.52 | 8.48  | 9.00  | 0.32 | -1.60 | 0.6960 |
| Padi3         | 1419767_at   | 0.0134 | -0.55 | 5.18  | 5.73  | 0.32 | -1.24 | 0.6834 |
| Fcer2a        | 1451713_a_at | 0.0135 | -0.50 | 7.81  | 8.31  | 0.33 | -1.60 | 0.7063 |
| Slc43a2       | 1434308_at   | 0.0136 | -0.31 | 9.37  | 9.68  | 0.33 | -1.25 | 0.8057 |
| Usp2          | 1417168_a_at | 0.0137 | -0.49 | 9.47  | 9.96  | 0.33 | -1.24 | 0.7131 |
| Btbd19        | 1437606_at   | 0.0137 | -0.33 | 11.05 | 11.38 | 0.33 | -1.46 | 0.7975 |
| Aim1          | 1426942_at   | 0.0137 | -0.59 | 8.58  | 9.17  | 0.33 | -1.45 | 0.6641 |
| Ccdc9         | 1453609_s_at | 0.0137 | -0.29 | 9.12  | 9.41  | 0.33 | -1.24 | 0.8162 |
| Ctdp1         | 1452697_at   | 0.0138 | -0.34 | 9.50  | 9.84  | 0.33 | -1.28 | 0.7920 |
| Herpud1       | 1435626_a_at | 0.0139 | -0.48 | 9.99  | 10.47 | 0.33 | -1.28 | 0.7169 |
| Srpk3         | 1418798_s_at | 0.0139 | -0.44 | 10.31 | 10.75 | 0.33 | -1.30 | 0.7366 |
| Samsn1        | 1421457_a_at | 0.0140 | -0.44 | 9.89  | 10.33 | 0.33 | -1.24 | 0.7389 |
| Akt2          | 1455703_at   | 0.0140 | -0.28 | 7.26  | 7.54  | 0.33 | -1.51 | 0.8256 |
| Mef2d         | 1434487_at   | 0.0141 | -0.27 | 10.45 | 10.72 | 0.33 | -1.67 | 0.8267 |
| Rasip1        | 1428016_a_at | 0.0141 | -0.36 | 5.75  | 6.11  | 0.33 | -1.23 | 0.7796 |
| Spata13       | 1454656_at   | 0.0141 | -0.69 | 8.42  | 9.11  | 0.33 | -1.44 | 0.6200 |
| Nphp4         | 1434024_at   | 0.0142 | -0.48 | 6.30  | 6.79  | 0.33 | -1.56 | 0.7154 |
| Emp1          | 1459171_at   | 0.0142 | -0.28 | 5.11  | 5.39  | 0.33 | -1.23 | 0.8233 |
| Gpr126        | 1437409_s_at | 0.0142 | -0.29 | 3.26  | 3.55  | 0.33 | -1.24 | 0.8192 |
| Invs          | 1419308_at   | 0.0143 | -0.32 | 9.57  | 9.88  | 0.33 | -1.24 | 0.8024 |
| 4930523C07Rik | 1438061_at   | 0.0143 | -0.27 | 8.82  | 9.09  | 0.33 | -1.40 | 0.8296 |
| Ppfia4        | 1428577_at   | 0.0147 | -0.46 | 5.71  | 6.17  | 0.33 | -1.36 | 0.7258 |
| Nfkb2         | 1425902_a_at | 0.0147 | -0.36 | 8.72  | 9.08  | 0.33 | -1.25 | 0.7812 |
| Fbxo2         | 1427004_at   | 0.0147 | -0.41 | 6.46  | 6.86  | 0.33 | -1.92 | 0.7545 |
| H2-Q6         | 1431008_at   | 0.0150 | -0.42 | 11.28 | 11.70 | 0.34 | -1.27 | 0.7490 |
| H2-Q8         | 1431008_at   | 0.0150 | -0.42 | 11.28 | 11.70 | 0.34 | -1.27 | 0.7490 |
| LOC68395      | 1431008_at   | 0.0150 | -0.42 | 11.28 | 11.70 | 0.34 | -1.27 | 0.7490 |
| Mxd3          | 1422970_at   | 0.0152 | -0.27 | 8.22  | 8.49  | 0.34 | -1.45 | 0.8299 |
| Rasal3        | 1456870_at   | 0.0152 | -0.29 | 7.49  | 7.78  | 0.34 | -1.30 | 0.8186 |
| Gjc3          | 1422042_at   | 0.0154 | -0.40 | 4.35  | 4.75  | 0.34 | -1.22 | 0.7582 |
| Nfkbie        | 1431843_a_at | 0.0154 | -0.42 | 10.44 | 10.86 | 0.34 | -1.51 | 0.7468 |
| Slc4a8        | 1456519_at   | 0.0154 | -0.64 | 4.52  | 5.16  | 0.34 | -1.36 | 0.6437 |
| Sept6         | 1420876_a_at | 0.0156 | -0.29 | 10.93 | 11.21 | 0.34 | -1.40 | 0.8180 |

|               |              |        |       |       |       |      |       |        |
|---------------|--------------|--------|-------|-------|-------|------|-------|--------|
| Pq1c1         | 1426567_a_at | 0.0158 | -0.31 | 7.79  | 8.10  | 0.34 | -1.21 | 0.8076 |
| AU042410      | 1440616_at   | 0.0159 | -0.29 | 3.54  | 3.84  | 0.34 | -1.41 | 0.8152 |
| Pycr2         | 1448315_a_at | 0.0160 | -0.33 | 10.65 | 10.99 | 0.34 | -1.25 | 0.7933 |
| Adcy7         | 1450065_at   | 0.0161 | -0.29 | 10.37 | 10.66 | 0.34 | -1.23 | 0.8198 |
| Fcrls         | 1448891_at   | 0.0162 | -0.33 | 5.91  | 6.24  | 0.34 | -1.21 | 0.7961 |
| Parp1         | 1422503_s_at | 0.0162 | -0.39 | 11.11 | 11.51 | 0.34 | -1.28 | 0.7612 |
| Ndr1          | 1423413_at   | 0.0162 | -0.36 | 4.74  | 5.09  | 0.34 | -1.55 | 0.7809 |
| Trim14        | 1436199_at   | 0.0162 | -0.38 | 8.39  | 8.77  | 0.34 | -1.38 | 0.7710 |
| Zfp94         | 1419521_at   | 0.0164 | -0.42 | 8.67  | 9.08  | 0.34 | -1.22 | 0.7495 |
| Tpd52         | 1419494_a_at | 0.0164 | -0.33 | 10.60 | 10.93 | 0.34 | -1.19 | 0.7929 |
| Slc25a45      | 1426883_at   | 0.0165 | -0.30 | 8.94  | 9.24  | 0.34 | -1.31 | 0.8142 |
| Ehf           | 1419474_a_at | 0.0166 | -0.55 | 7.69  | 8.25  | 0.34 | -1.48 | 0.6818 |
| Neu1          | 1416831_at   | 0.0168 | -0.45 | 9.15  | 9.60  | 0.34 | -1.33 | 0.7314 |
| C430042M11Rik | 1457878_at   | 0.0169 | -0.33 | 9.68  | 10.00 | 0.34 | -1.37 | 0.7971 |
| Alcam         | 1443086_at   | 0.0169 | -0.44 | 5.19  | 5.63  | 0.34 | -1.26 | 0.7396 |
| Crat          | 1417008_at   | 0.0169 | -0.28 | 9.17  | 9.45  | 0.34 | -1.19 | 0.8251 |
| Cers4         | 1417782_at   | 0.0169 | -0.48 | 6.91  | 7.39  | 0.34 | -1.24 | 0.7185 |
| Dbn1          | 1426024_a_at | 0.0169 | -0.42 | 5.90  | 6.33  | 0.34 | -1.21 | 0.7460 |
| Sult1a1       | 1427345_a_at | 0.0170 | -0.54 | 5.93  | 6.47  | 0.34 | -1.22 | 0.6893 |
| Sec22c        | 1456091_at   | 0.0170 | -0.31 | 7.75  | 8.06  | 0.34 | -1.18 | 0.8085 |
| Smarcb1       | 1456938_at   | 0.0170 | -0.36 | 7.86  | 8.22  | 0.34 | -1.45 | 0.7769 |
| Pea15a        | 1416407_at   | 0.0170 | -0.31 | 8.31  | 8.62  | 0.35 | -1.21 | 0.8059 |
| Kcnk10        | 1431613_a_at | 0.0171 | -0.27 | 6.03  | 6.30  | 0.35 | -1.19 | 0.8275 |
| Zfp36         | 1452519_a_at | 0.0171 | -0.51 | 10.04 | 10.55 | 0.35 | -1.27 | 0.7030 |
| Slc45a4       | 1433559_at   | 0.0172 | -0.27 | 9.59  | 9.86  | 0.35 | -1.33 | 0.8291 |
| Lrrc49        | 1451173_at   | 0.0175 | -0.75 | 5.93  | 6.69  | 0.35 | -1.30 | 0.5937 |
| Micu1         | 1451207_at   | 0.0176 | -0.40 | 9.06  | 9.47  | 0.35 | -1.24 | 0.7555 |
| Pglyrp1       | 1449184_at   | 0.0177 | -0.87 | 8.15  | 9.03  | 0.35 | -1.54 | 0.5454 |
| Ctla4         | 1419334_at   | 0.0178 | -0.42 | 6.94  | 7.36  | 0.35 | -1.20 | 0.7487 |
| Hsd11b1       | 1449038_at   | 0.0178 | -0.89 | 6.86  | 7.75  | 0.35 | -1.57 | 0.5386 |
| Eepd1         | 1447828_x_at | 0.0179 | -0.38 | 3.62  | 4.00  | 0.35 | -1.39 | 0.7675 |
| Tpk1          | 1457662_x_at | 0.0180 | -0.42 | 5.56  | 5.98  | 0.35 | -1.52 | 0.7489 |
| Recql5        | 1421235_s_at | 0.0182 | -0.34 | 8.98  | 9.32  | 0.35 | -1.45 | 0.7919 |
| Arsb          | 1429189_at   | 0.0182 | -0.37 | 7.46  | 7.83  | 0.35 | -1.26 | 0.7745 |
| Rapgef4       | 1444034_at   | 0.0183 | -0.62 | 7.13  | 7.75  | 0.35 | -1.19 | 0.6488 |
| Actr3b        | 1435605_at   | 0.0183 | -0.66 | 7.46  | 8.11  | 0.35 | -1.16 | 0.6341 |
| Ifi2712a      | 1426278_at   | 0.0183 | -0.70 | 11.48 | 12.18 | 0.35 | -1.43 | 0.6153 |
| Ston1         | 1439213_at   | 0.0185 | -0.30 | 3.63  | 3.93  | 0.35 | -1.20 | 0.8119 |
| Aif1l         | 1424263_at   | 0.0187 | -0.44 | 7.34  | 7.77  | 0.35 | -1.19 | 0.7389 |
| Gramd3        | 1428737_s_at | 0.0188 | -0.33 | 9.96  | 10.29 | 0.35 | -1.19 | 0.7975 |
| D5Wsu148e     | 1443734_at   | 0.0190 | -0.29 | 6.37  | 6.66  | 0.35 | -1.18 | 0.8180 |
| Npy4r         | 1422271_at   | 0.0191 | -0.28 | 4.67  | 4.95  | 0.35 | -1.23 | 0.8228 |
| Dok1          | 1417790_at   | 0.0192 | -0.32 | 9.48  | 9.80  | 0.35 | -1.45 | 0.7989 |
| Piwil2        | 1449170_at   | 0.0192 | -0.44 | 8.59  | 9.03  | 0.35 | -1.19 | 0.7390 |
| Tank          | 1421640_a_at | 0.0194 | -0.28 | 9.75  | 10.03 | 0.36 | -1.40 | 0.8209 |
| 1700016K19Rik | 1436593_at   | 0.0195 | -0.43 | 4.33  | 4.76  | 0.36 | -1.18 | 0.7432 |
| BC026513      | 1431860_at   | 0.0197 | -0.39 | 5.61  | 5.99  | 0.36 | -1.21 | 0.7647 |
| Irf4          | 1421173_at   | 0.0199 | -0.31 | 11.45 | 11.75 | 0.36 | -1.37 | 0.8070 |
| 1700012B15Rik | 1431818_at   | 0.0200 | -0.30 | 9.23  | 9.54  | 0.36 | -1.18 | 0.8105 |
| Mpeg1         | 1427076_at   | 0.0201 | -0.68 | 8.61  | 9.29  | 0.36 | -1.52 | 0.6242 |
| Map3k7cl      | 1451810_at   | 0.0201 | -0.27 | 3.54  | 3.81  | 0.36 | -1.14 | 0.8283 |
| Casp6         | 1415995_at   | 0.0202 | -0.29 | 8.78  | 9.07  | 0.36 | -1.14 | 0.8192 |
| 1700056E22Rik | 1429677_at   | 0.0205 | -0.30 | 7.11  | 7.41  | 0.36 | -1.13 | 0.8117 |
| Cbfa2t3       | 1440963_at   | 0.0206 | -0.31 | 6.67  | 6.98  | 0.36 | -1.15 | 0.8073 |
| Zfp365        | 1433583_at   | 0.0206 | -0.88 | 5.84  | 6.72  | 0.36 | -1.27 | 0.5416 |
| Dqx1          | 1450314_at   | 0.0208 | -0.38 | 5.61  | 5.99  | 0.36 | -1.51 | 0.7703 |
| Krt28         | 1430132_at   | 0.0208 | -0.39 | 4.53  | 4.92  | 0.37 | -1.22 | 0.7623 |
| Emp3          | 1417104_at   | 0.0208 | -0.58 | 10.39 | 10.97 | 0.37 | -1.29 | 0.6686 |
| E2f1          | 1431875_a_at | 0.0210 | -0.27 | 7.80  | 8.07  | 0.37 | -1.79 | 0.8305 |
| Wsb2          | 1421846_at   | 0.0210 | -0.27 | 7.50  | 7.78  | 0.37 | -1.17 | 0.8272 |
| Stk32b        | 1452420_at   | 0.0211 | -0.27 | 5.40  | 5.68  | 0.37 | -1.12 | 0.8283 |
| Dedd2         | 1452070_at   | 0.0211 | -0.40 | 8.42  | 8.81  | 0.37 | -1.40 | 0.7603 |
| Socs2         | 1438470_at   | 0.0213 | -0.75 | 5.54  | 6.29  | 0.37 | -1.19 | 0.5958 |
| Camk2a        | 1442707_at   | 0.0217 | -0.35 | 5.19  | 5.54  | 0.37 | -1.33 | 0.7851 |
| Prp1          | 1431361_at   | 0.0217 | -0.48 | 5.07  | 5.55  | 0.37 | -1.13 | 0.7168 |
| Agpat4        | 1428336_at   | 0.0217 | -0.33 | 6.90  | 7.23  | 0.37 | -1.26 | 0.7949 |
| Kif17         | 1422762_at   | 0.0219 | -0.36 | 5.41  | 5.76  | 0.37 | -1.38 | 0.7809 |



|               |              |        |       |       |       |      |       |        |
|---------------|--------------|--------|-------|-------|-------|------|-------|--------|
| Sgip1         | 1425180_at   | 0.0222 | -0.44 | 3.93  | 4.37  | 0.37 | -1.96 | 0.7380 |
| Adssl1        | 1449383_at   | 0.0222 | -0.57 | 7.62  | 8.20  | 0.37 | -1.61 | 0.6715 |
| Galnt6        | 1434399_at   | 0.0223 | -0.45 | 7.91  | 8.36  | 0.37 | -1.73 | 0.7318 |
| Rem2          | 1448860_at   | 0.0224 | -0.53 | 5.68  | 6.21  | 0.37 | -1.17 | 0.6935 |
| P2rx4         | 1441772_at   | 0.0224 | -0.27 | 5.58  | 5.85  | 0.37 | -1.16 | 0.8303 |
| Spata9        | 1453213_at   | 0.0224 | -0.36 | 5.58  | 5.94  | 0.37 | -1.10 | 0.7799 |
| Cyp19a1       | 1449920_at   | 0.0225 | -0.27 | 3.74  | 4.01  | 0.37 | -1.40 | 0.8296 |
| Hsh2d         | 1442130_at   | 0.0225 | -0.32 | 9.04  | 9.36  | 0.37 | -1.20 | 0.7994 |
| E130304I02Rik | 1454261_at   | 0.0225 | -0.27 | 4.52  | 4.80  | 0.37 | -1.15 | 0.8280 |
| St8sia1       | 1419695_at   | 0.0227 | -0.59 | 5.57  | 6.16  | 0.37 | -1.14 | 0.6665 |
| Prkcz         | 1454902_at   | 0.0228 | -0.29 | 5.99  | 6.28  | 0.37 | -1.12 | 0.8179 |
| Med16         | 1438416_at   | 0.0229 | -0.36 | 7.66  | 8.02  | 0.37 | -1.11 | 0.7767 |
| Cnr2          | 1450476_at   | 0.0229 | -0.41 | 8.58  | 8.99  | 0.37 | -1.35 | 0.7544 |
| Zfp423        | 1419380_at   | 0.0231 | -0.45 | 5.48  | 5.93  | 0.38 | -1.11 | 0.7308 |
| Spag16        | 1429838_at   | 0.0231 | -0.31 | 4.56  | 4.87  | 0.38 | -1.50 | 0.8054 |
| Slc12a8       | 1420334_at   | 0.0231 | -0.35 | 6.06  | 6.40  | 0.38 | -1.22 | 0.7865 |
| Hormad2       | 1454052_at   | 0.0232 | -0.28 | 5.45  | 5.73  | 0.38 | -1.11 | 0.8211 |
| Arhgap31      | 1455164_at   | 0.0234 | -0.31 | 8.95  | 9.25  | 0.38 | -1.09 | 0.8068 |
| Morn1         | 1456435_at   | 0.0234 | -0.81 | 6.95  | 7.77  | 0.38 | -1.39 | 0.5685 |
| Tgfb2         | 1425444_a_at | 0.0235 | -0.31 | 6.27  | 6.58  | 0.38 | -1.42 | 0.8065 |
| Tbc1d22a      | 1451107_at   | 0.0237 | -0.27 | 8.76  | 9.03  | 0.38 | -1.11 | 0.8293 |
| Mapre2        | 1442553_at   | 0.0237 | -0.50 | 5.43  | 5.93  | 0.38 | -1.31 | 0.7086 |
| Grn           | 1448148_at   | 0.0238 | -0.55 | 8.18  | 8.73  | 0.38 | -1.21 | 0.6852 |
| Jdp2          | 1450350_a_at | 0.0238 | -0.37 | 9.39  | 9.75  | 0.38 | -1.09 | 0.7755 |
| 2310050B05Rik | 1458369_at   | 0.0240 | -0.46 | 5.98  | 6.44  | 0.38 | -1.29 | 0.7280 |
| Nog           | 1422300_at   | 0.0240 | -0.40 | 4.19  | 4.59  | 0.38 | -1.26 | 0.7589 |
| Eif2ak3       | 1430371_x_at | 0.0240 | -0.29 | 7.72  | 8.01  | 0.38 | -1.94 | 0.8191 |
| Litaf         | 1416304_at   | 0.0240 | -0.42 | 8.19  | 8.60  | 0.38 | -1.80 | 0.7499 |
| Tgm2          | 1417500_a_at | 0.0242 | -0.32 | 5.07  | 5.39  | 0.38 | -1.36 | 0.8024 |
| Mcm9          | 1430563_at   | 0.0243 | -0.32 | 5.87  | 6.20  | 0.38 | -1.12 | 0.7999 |
| Fhl1          | 1417872_at   | 0.0245 | -1.16 | 6.69  | 7.85  | 0.38 | -1.25 | 0.4467 |
| Pisd-ps3      | 1429452_x_at | 0.0247 | -0.32 | 8.36  | 8.68  | 0.38 | -1.08 | 0.8016 |
| Prrc1         | 1432631_at   | 0.0250 | -0.28 | 7.07  | 7.35  | 0.38 | -1.08 | 0.8259 |
| H2-M10.1      | 1450587_at   | 0.0250 | -0.29 | 5.60  | 5.89  | 0.38 | -1.08 | 0.8203 |
| Mfsd12        | 1434263_at   | 0.0254 | -0.28 | 8.76  | 9.04  | 0.39 | -1.13 | 0.8249 |
| Ift172        | 1423068_at   | 0.0255 | -0.36 | 7.99  | 8.35  | 0.39 | -1.08 | 0.7808 |
| Tnfaip811     | 1449125_at   | 0.0256 | -0.45 | 6.97  | 7.42  | 0.39 | -1.08 | 0.7326 |
| Akap2         | 1449168_a_at | 0.0259 | -0.27 | 9.10  | 9.37  | 0.39 | -1.08 | 0.8294 |
| Il12a         | 1425454_a_at | 0.0259 | -0.42 | 6.88  | 7.30  | 0.39 | -1.07 | 0.7464 |
| Kmo           | 1418998_at   | 0.0261 | -0.61 | 10.35 | 10.96 | 0.39 | -1.08 | 0.6544 |
| Hip1          | 1434557_at   | 0.0262 | -0.51 | 6.38  | 6.89  | 0.39 | -1.08 | 0.7017 |
| Slc28a3       | 1419571_at   | 0.0265 | -0.35 | 4.34  | 4.69  | 0.39 | -1.06 | 0.7839 |
| Tbxa2r        | 1419222_at   | 0.0266 | -0.34 | 7.13  | 7.47  | 0.39 | -1.19 | 0.7892 |
| Ggnbp1        | 1433904_at   | 0.0266 | -0.60 | 6.37  | 6.97  | 0.39 | -1.17 | 0.6607 |
| Arid4b        | 1446317_at   | 0.0266 | -0.36 | 5.15  | 5.51  | 0.39 | -1.14 | 0.7783 |
| N6am11        | 1453821_at   | 0.0267 | -0.32 | 6.87  | 7.19  | 0.39 | -1.14 | 0.8030 |
| lqsec1        | 1452327_at   | 0.0267 | -0.38 | 8.94  | 9.33  | 0.39 | -1.06 | 0.7675 |
| Per1          | 1449851_at   | 0.0267 | -0.46 | 7.85  | 8.31  | 0.39 | -1.41 | 0.7247 |
| Cd276         | 1417599_at   | 0.0269 | -0.30 | 6.65  | 6.96  | 0.39 | -1.05 | 0.8114 |
| Cotl1         | 1416002_x_at | 0.0269 | -0.43 | 8.99  | 9.42  | 0.39 | -1.44 | 0.7430 |
| Ppap2a        | 1422620_s_at | 0.0269 | -0.29 | 9.90  | 10.19 | 0.39 | -1.28 | 0.8207 |
| Krtap5-1      | 1450539_at   | 0.0270 | -0.35 | 6.26  | 6.62  | 0.39 | -1.06 | 0.7831 |
| Avil          | 1419148_at   | 0.0271 | -0.37 | 6.54  | 6.91  | 0.39 | -1.06 | 0.7754 |
| Gpr110        | 1421443_at   | 0.0273 | -0.36 | 3.62  | 3.98  | 0.39 | -1.50 | 0.7791 |
| BC051142      | 1437264_at   | 0.0274 | -0.79 | 8.25  | 9.05  | 0.39 | -1.28 | 0.5770 |
| Amhr2         | 1427989_at   | 0.0274 | -0.28 | 6.61  | 6.89  | 0.39 | -1.13 | 0.8244 |
| Zfp36l2       | 1437626_at   | 0.0275 | -0.40 | 11.60 | 12.01 | 0.39 | -1.20 | 0.7562 |
| Gm10785       | 1442574_at   | 0.0276 | -0.30 | 6.39  | 6.69  | 0.39 | -1.08 | 0.8144 |
| Acap1         | 1437117_at   | 0.0277 | -0.37 | 10.94 | 11.31 | 0.39 | -1.07 | 0.7754 |
| Zmiz2         | 1460739_at   | 0.0279 | -0.28 | 9.97  | 10.25 | 0.39 | -1.05 | 0.8261 |
| Fgd2          | 1419515_at   | 0.0279 | -0.61 | 9.13  | 9.73  | 0.39 | -1.06 | 0.6574 |
| Gpr174        | 1440900_at   | 0.0279 | -0.53 | 6.05  | 6.58  | 0.39 | -1.40 | 0.6930 |
| Sp100         | 1434457_at   | 0.0280 | -0.30 | 7.43  | 7.73  | 0.39 | -1.33 | 0.8107 |
| B4galnt2      | 1442028_at   | 0.0282 | -0.46 | 5.85  | 6.30  | 0.39 | -1.06 | 0.7292 |
| Aoc3          | 1449396_at   | 0.0285 | -0.28 | 5.74  | 6.03  | 0.39 | -1.04 | 0.8216 |
| Myo15b        | 1435979_a_at | 0.0287 | -0.40 | 4.61  | 5.01  | 0.40 | -1.05 | 0.7586 |
| Unkl          | 1428565_at   | 0.0287 | -0.30 | 8.40  | 8.70  | 0.40 | -1.10 | 0.8126 |

|               |              |        |       |       |       |      |       |        |
|---------------|--------------|--------|-------|-------|-------|------|-------|--------|
| Rhof          | 1434794_at   | 0.0287 | -0.44 | 8.87  | 9.30  | 0.40 | -1.17 | 0.7386 |
| 5730577103Rik | 1431312_at   | 0.0289 | -0.27 | 5.95  | 6.21  | 0.40 | -1.41 | 0.8305 |
| Scgn          | 1451534_at   | 0.0291 | -0.28 | 5.12  | 5.40  | 0.40 | -1.18 | 0.8253 |
| Mybbp1a       | 1423430_at   | 0.0292 | -0.27 | 9.69  | 9.96  | 0.40 | -1.07 | 0.8300 |
| Defb2         | 1450554_at   | 0.0293 | -0.28 | 5.05  | 5.33  | 0.40 | -1.06 | 0.8260 |
| Susd3         | 1428975_at   | 0.0296 | -0.56 | 10.00 | 10.56 | 0.40 | -1.03 | 0.6798 |
| Lrrc8c        | 1423614_at   | 0.0296 | -0.36 | 7.61  | 7.97  | 0.40 | -1.04 | 0.7779 |
| Arel1         | 1433767_at   | 0.0297 | -0.36 | 10.14 | 10.50 | 0.40 | -1.19 | 0.7799 |
| Ndp           | 1449251_at   | 0.0298 | -0.34 | 4.15  | 4.48  | 0.40 | -1.06 | 0.7927 |
| Pla2g12a      | 1452026_a_at | 0.0299 | -0.42 | 8.30  | 8.72  | 0.40 | -1.09 | 0.7476 |
| Spn           | 1439034_at   | 0.0301 | -0.34 | 8.83  | 9.18  | 0.40 | -1.16 | 0.7881 |
| lft122        | 1427239_at   | 0.0302 | -0.45 | 7.12  | 7.57  | 0.40 | -1.03 | 0.7308 |
| Ms4a4c        | 1450291_s_at | 0.0302 | -0.52 | 9.61  | 10.13 | 0.40 | -1.27 | 0.6975 |
| Clcf1         | 1450262_at   | 0.0307 | -0.41 | 7.38  | 7.80  | 0.40 | -1.12 | 0.7513 |
| Il23a         | 1419529_at   | 0.0307 | -0.27 | 4.71  | 4.98  | 0.40 | -1.08 | 0.8267 |
| Magea1        | 1450542_s_at | 0.0308 | -0.30 | 3.96  | 4.26  | 0.40 | -1.04 | 0.8144 |
| Magea2        | 1450542_s_at | 0.0308 | -0.30 | 3.96  | 4.26  | 0.40 | -1.04 | 0.8144 |
| Magea3        | 1450542_s_at | 0.0308 | -0.30 | 3.96  | 4.26  | 0.40 | -1.04 | 0.8144 |
| Magea5        | 1450542_s_at | 0.0308 | -0.30 | 3.96  | 4.26  | 0.40 | -1.04 | 0.8144 |
| Magea6        | 1450542_s_at | 0.0308 | -0.30 | 3.96  | 4.26  | 0.40 | -1.04 | 0.8144 |
| Magea8        | 1450542_s_at | 0.0308 | -0.30 | 3.96  | 4.26  | 0.40 | -1.04 | 0.8144 |
| Dock9         | 1450931_at   | 0.0308 | -0.42 | 7.45  | 7.87  | 0.40 | -1.06 | 0.7483 |
| Ly6d          | 1416930_at   | 0.0311 | -0.48 | 10.49 | 10.97 | 0.40 | -1.27 | 0.7183 |
| Al131651      | 1440736_at   | 0.0311 | -0.56 | 8.29  | 8.84  | 0.40 | -1.02 | 0.6805 |
| Unc119b       | 1460733_at   | 0.0313 | -0.32 | 9.90  | 10.21 | 0.40 | -1.15 | 0.8019 |
| 1700066M21Rik | 1431183_at   | 0.0314 | -0.26 | 5.71  | 5.98  | 0.40 | -1.08 | 0.8327 |
| Relb          | 1417856_at   | 0.0315 | -0.38 | 8.65  | 9.03  | 0.40 | -1.15 | 0.7701 |
| Sprr2i        | 1422963_at   | 0.0315 | -0.27 | 3.40  | 3.67  | 0.40 | -1.02 | 0.8271 |
| Dtx1          | 1458643_at   | 0.0316 | -0.30 | 7.66  | 7.95  | 0.40 | -1.12 | 0.8132 |
| Tnfaip3       | 1433699_at   | 0.0319 | -0.39 | 9.00  | 9.39  | 0.40 | -1.02 | 0.7612 |
| C76434        | 1443409_at   | 0.0321 | -0.31 | 5.58  | 5.89  | 0.41 | -1.04 | 0.8092 |
| Gfi1b         | 1420399_at   | 0.0324 | -0.33 | 6.99  | 7.33  | 0.41 | -1.28 | 0.7932 |
| C530008M17Rik | 1454596_at   | 0.0324 | -0.27 | 3.14  | 3.41  | 0.41 | -1.01 | 0.8301 |
| C030048H21Rik | 1439194_at   | 0.0325 | -0.36 | 4.65  | 5.01  | 0.41 | -1.03 | 0.7795 |
| Fhad1         | 1439190_at   | 0.0325 | -0.28 | 6.34  | 6.62  | 0.41 | -1.13 | 0.8220 |
| Ccnd3         | 1438805_at   | 0.0325 | -0.58 | 7.16  | 7.75  | 0.41 | -1.05 | 0.6688 |
| Cd72          | 1426112_a_at | 0.0327 | -0.39 | 11.94 | 12.33 | 0.41 | -1.10 | 0.7629 |
| Sp110         | 1429563_x_at | 0.0328 | -0.53 | 8.85  | 9.38  | 0.41 | -1.50 | 0.6924 |
| Samd5         | 1437887_at   | 0.0328 | -0.31 | 5.80  | 6.11  | 0.41 | -1.13 | 0.8084 |
| Irf5          | 1460231_at   | 0.0330 | -0.34 | 10.18 | 10.52 | 0.41 | -1.68 | 0.7886 |
| Fam122a       | 1453981_at   | 0.0332 | -0.29 | 5.95  | 6.24  | 0.41 | -1.14 | 0.8201 |
| Cxcr5         | 1422003_at   | 0.0338 | -0.35 | 10.60 | 10.94 | 0.41 | -1.23 | 0.7863 |
| Id2           | 1453596_at   | 0.0338 | -0.44 | 4.91  | 5.35  | 0.41 | -1.28 | 0.7382 |
| BC029214      | 1455596_a_at | 0.0341 | -0.28 | 8.87  | 9.15  | 0.42 | -1.00 | 0.8228 |
| H2-Eb2        | 1440907_at   | 0.0342 | -0.53 | 10.89 | 11.42 | 0.42 | -1.08 | 0.6907 |
| LOC100043315  | 1450328_at   | 0.0346 | -0.27 | 4.02  | 4.29  | 0.42 | -1.20 | 0.8275 |
| Lipe          | 1422820_at   | 0.0349 | -0.35 | 7.07  | 7.41  | 0.42 | -1.04 | 0.7869 |
| LOC101055998  | 1422820_at   | 0.0349 | -0.35 | 7.07  | 7.41  | 0.42 | -1.04 | 0.7869 |
| Tfcp2l1       | 1460715_x_at | 0.0351 | -0.32 | 5.25  | 5.57  | 0.42 | -0.99 | 0.8010 |
| Cdc42se2      | 1435220_s_at | 0.0353 | -0.33 | 10.50 | 10.84 | 0.42 | -1.04 | 0.7933 |
| LOC101056447  | 1435220_s_at | 0.0353 | -0.33 | 10.50 | 10.84 | 0.42 | -1.04 | 0.7933 |
| Itgb1         | 1430630_at   | 0.0354 | -0.28 | 4.54  | 4.82  | 0.42 | -1.06 | 0.8254 |
| Slc7a5        | 1418326_at   | 0.0354 | -0.29 | 10.53 | 10.82 | 0.42 | -1.25 | 0.8179 |
| Nprl3         | 1433548_at   | 0.0355 | -0.29 | 8.86  | 9.15  | 0.42 | -1.01 | 0.8203 |
| LOC101055758  | 1460416_s_at | 0.0356 | -0.41 | 9.40  | 9.82  | 0.42 | -1.04 | 0.7505 |
| Nxpe2         | 1453220_at   | 0.0356 | -0.41 | 11.11 | 11.52 | 0.42 | -1.25 | 0.7538 |
| Gna15         | 1421302_a_at | 0.0357 | -0.41 | 5.85  | 6.26  | 0.42 | -1.01 | 0.7519 |
| Bre           | 1426312_at   | 0.0357 | -0.29 | 9.63  | 9.92  | 0.42 | -1.31 | 0.8183 |
| LOC664787     | 1435660_at   | 0.0358 | -0.55 | 9.56  | 10.11 | 0.42 | -0.99 | 0.6812 |
| Slc15a2       | 1424730_a_at | 0.0358 | -0.40 | 5.33  | 5.73  | 0.42 | -0.98 | 0.7577 |
| Nab2          | 1417930_at   | 0.0359 | -0.46 | 8.26  | 8.72  | 0.42 | -0.99 | 0.7246 |
| Spink5        | 1430567_at   | 0.0360 | -0.31 | 3.52  | 3.83  | 0.42 | -1.00 | 0.8087 |
| Prr24         | 1455135_at   | 0.0361 | -0.49 | 9.12  | 9.61  | 0.42 | -1.09 | 0.7120 |
| Ccnd2         | 1416122_at   | 0.0364 | -0.38 | 7.49  | 7.86  | 0.42 | -0.98 | 0.7696 |
| Sorcs2        | 1419358_at   | 0.0364 | -0.34 | 6.59  | 6.93  | 0.42 | -1.04 | 0.7888 |
| 5430427O19Rik | 1430373_at   | 0.0365 | -0.32 | 8.71  | 9.03  | 0.42 | -1.01 | 0.8017 |
| Anxa1         | 1448213_at   | 0.0365 | -0.66 | 7.16  | 7.82  | 0.42 | -0.98 | 0.6336 |

|               |              |        |       |       |       |      |       |        |
|---------------|--------------|--------|-------|-------|-------|------|-------|--------|
| Rccd1         | 1456411_at   | 0.0366 | -0.29 | 8.05  | 8.34  | 0.42 | -1.09 | 0.8192 |
| Man1c1        | 1436193_at   | 0.0368 | -0.66 | 7.08  | 7.74  | 0.42 | -0.98 | 0.6317 |
| Fhod3         | 1435551_at   | 0.0371 | -0.31 | 5.60  | 5.91  | 0.42 | -0.97 | 0.8087 |
| Cd68          | 1449164_at   | 0.0371 | -0.35 | 8.54  | 8.89  | 0.42 | -1.01 | 0.7864 |
| Lrrc18        | 1449894_at   | 0.0378 | -0.28 | 5.90  | 6.17  | 0.43 | -1.10 | 0.8251 |
| Sec16b        | 1450734_at   | 0.0381 | -0.74 | 6.02  | 6.76  | 0.43 | -1.18 | 0.5986 |
| Magea7-ps     | 1422423_at   | 0.0386 | -0.33 | 5.28  | 5.62  | 0.43 | -1.30 | 0.7943 |
| Tspan2        | 1424568_at   | 0.0387 | -0.31 | 7.45  | 7.76  | 0.43 | -0.96 | 0.8083 |
| Efcab11       | 1431667_s_at | 0.0388 | -0.28 | 7.24  | 7.52  | 0.43 | -0.98 | 0.8257 |
| Hist2h2aa1    | 1438815_at   | 0.0389 | -0.27 | 7.16  | 7.44  | 0.43 | -0.96 | 0.8274 |
| Hist2h2aa2    | 1438815_at   | 0.0389 | -0.27 | 7.16  | 7.44  | 0.43 | -0.96 | 0.8274 |
| Nov           | 1426852_x_at | 0.0389 | -0.28 | 3.63  | 3.91  | 0.43 | -1.07 | 0.8257 |
| Vwa7          | 1450230_at   | 0.0393 | -0.29 | 8.40  | 8.68  | 0.44 | -1.07 | 0.8198 |
| Tusc3         | 1421662_a_at | 0.0397 | -0.47 | 8.74  | 9.21  | 0.44 | -1.09 | 0.7219 |
| Il6ra         | 1452416_at   | 0.0397 | -0.38 | 7.75  | 8.13  | 0.44 | -1.08 | 0.7676 |
| Acvr11        | 1451604_a_at | 0.0397 | -0.30 | 5.75  | 6.05  | 0.44 | -1.00 | 0.8142 |
| Klf12         | 1441040_at   | 0.0401 | -0.64 | 3.27  | 3.91  | 0.44 | -1.02 | 0.6412 |
| Nxpe4         | 1456111_at   | 0.0401 | -0.30 | 5.87  | 6.16  | 0.44 | -0.96 | 0.8145 |
| Sit1          | 1418751_at   | 0.0401 | -0.36 | 7.59  | 7.95  | 0.44 | -0.95 | 0.7780 |
| Eef1d         | 1459754_x_at | 0.0403 | -0.32 | 4.58  | 4.90  | 0.44 | -1.02 | 0.7987 |
| Gm20559       | 1436172_at   | 0.0403 | -0.30 | 9.55  | 9.86  | 0.44 | -1.05 | 0.8100 |
| Ifngr2        | 1423557_at   | 0.0403 | -0.31 | 7.88  | 8.19  | 0.44 | -1.06 | 0.8061 |
| Trav9d-3      | 1426113_x_at | 0.0404 | -0.45 | 6.56  | 7.01  | 0.44 | -0.95 | 0.7338 |
| Ccnb1ip1      | 1435998_at   | 0.0404 | -0.39 | 4.96  | 5.35  | 0.44 | -0.95 | 0.7650 |
| Srcrb4d       | 1438147_at   | 0.0406 | -0.29 | 7.93  | 8.22  | 0.44 | -0.95 | 0.8167 |
| Ceacam1       | 1460682_s_at | 0.0407 | -0.58 | 9.06  | 9.64  | 0.44 | -1.22 | 0.6670 |
| Ceacam2       | 1460682_s_at | 0.0407 | -0.58 | 9.06  | 9.64  | 0.44 | -1.22 | 0.6670 |
| Prkd2         | 1434333_a_at | 0.0408 | -0.30 | 10.45 | 10.74 | 0.44 | -1.00 | 0.8141 |
| Nfkbid        | 1436074_at   | 0.0409 | -0.33 | 8.35  | 8.68  | 0.44 | -0.96 | 0.7975 |
| Ybx2          | 1420762_a_at | 0.0409 | -0.37 | 4.50  | 4.88  | 0.44 | -0.95 | 0.7720 |
| Sh3pxd2a      | 1428914_at   | 0.0412 | -0.29 | 10.41 | 10.71 | 0.44 | -1.27 | 0.8167 |
| Tmem109       | 1416033_at   | 0.0413 | -0.27 | 6.21  | 6.48  | 0.44 | -0.97 | 0.8277 |
| Stx3          | 1425536_at   | 0.0415 | -0.59 | 6.22  | 6.81  | 0.44 | -0.94 | 0.6622 |
| Cd86          | 1420404_at   | 0.0417 | -0.30 | 11.17 | 11.48 | 0.44 | -1.27 | 0.8104 |
| Def6          | 1452796_at   | 0.0418 | -0.29 | 9.30  | 9.59  | 0.44 | -1.07 | 0.8160 |
| Gimap4        | 1424374_at   | 0.0419 | -0.41 | 10.30 | 10.71 | 0.44 | -1.22 | 0.7517 |
| Rab6b         | 1434914_at   | 0.0420 | -0.70 | 6.00  | 6.70  | 0.44 | -1.01 | 0.6161 |
| Derl3         | 1453677_a_at | 0.0421 | -0.32 | 8.86  | 9.19  | 0.44 | -1.19 | 0.7984 |
| Mical1        | 1416759_at   | 0.0428 | -0.28 | 10.96 | 11.25 | 0.44 | -0.97 | 0.8222 |
| Fam49a        | 1454806_at   | 0.0430 | -0.51 | 6.67  | 7.18  | 0.44 | -0.97 | 0.7015 |
| Amdhd2        | 1434855_at   | 0.0431 | -0.28 | 9.40  | 9.68  | 0.44 | -0.96 | 0.8224 |
| Vopp1         | 1451127_at   | 0.0435 | -0.58 | 7.39  | 7.97  | 0.44 | -0.93 | 0.6691 |
| Tns3          | 1455333_at   | 0.0439 | -0.62 | 6.62  | 7.23  | 0.45 | -0.98 | 0.6510 |
| Rnf183        | 1425124_at   | 0.0439 | -0.92 | 6.79  | 7.71  | 0.45 | -1.52 | 0.5302 |
| Kcnma1        | 1428948_at   | 0.0444 | -0.29 | 3.90  | 4.19  | 0.45 | -0.95 | 0.8182 |
| Zfp513        | 1437483_at   | 0.0444 | -0.31 | 8.87  | 9.17  | 0.45 | -0.95 | 0.8073 |
| Osbp15        | 1425391_a_at | 0.0444 | -0.38 | 6.49  | 6.88  | 0.45 | -0.98 | 0.7665 |
| Tspan11       | 1445860_at   | 0.0445 | -0.35 | 4.51  | 4.86  | 0.45 | -0.93 | 0.7859 |
| Dchs1         | 1429163_at   | 0.0445 | -0.27 | 4.54  | 4.81  | 0.45 | -0.96 | 0.8306 |
| Mia           | 1419608_a_at | 0.0445 | -0.28 | 6.36  | 6.64  | 0.45 | -0.94 | 0.8211 |
| Ildr1         | 1423276_at   | 0.0447 | -0.32 | 8.49  | 8.81  | 0.45 | -0.94 | 0.7993 |
| Unc13b        | 1417757_at   | 0.0448 | -0.38 | 5.30  | 5.68  | 0.45 | -1.03 | 0.7659 |
| Sftpa1        | 1422334_a_at | 0.0449 | -0.33 | 5.08  | 5.41  | 0.45 | -1.05 | 0.7969 |
| Fxyd5         | 1418296_at   | 0.0450 | -0.71 | 9.01  | 9.72  | 0.45 | -1.12 | 0.6102 |
| Slc20a1       | 1438824_at   | 0.0450 | -0.61 | 5.90  | 6.51  | 0.45 | -1.05 | 0.6557 |
| Trpm5         | 1418783_at   | 0.0451 | -1.09 | 7.23  | 8.32  | 0.45 | -1.00 | 0.4704 |
| Dpysl4        | 1418298_s_at | 0.0451 | -0.29 | 4.77  | 5.05  | 0.45 | -1.03 | 0.8193 |
| Pld4          | 1433678_at   | 0.0451 | -0.47 | 11.03 | 11.50 | 0.45 | -1.03 | 0.7219 |
| Cep44         | 1440773_at   | 0.0453 | -0.34 | 8.40  | 8.74  | 0.45 | -1.00 | 0.7896 |
| R74862        | 1418802_at   | 0.0453 | -0.36 | 6.38  | 6.73  | 0.45 | -1.21 | 0.7810 |
| 5530601H04Rik | 1452750_at   | 0.0455 | -0.30 | 9.18  | 9.49  | 0.45 | -0.94 | 0.8099 |
| Lefty1        | 1417638_at   | 0.0458 | -0.49 | 8.50  | 8.99  | 0.45 | -1.10 | 0.7134 |
| Stx11         | 1453228_at   | 0.0463 | -0.30 | 8.55  | 8.85  | 0.45 | -0.96 | 0.8107 |
| Slc11a1       | 1420361_at   | 0.0465 | -0.39 | 6.22  | 6.60  | 0.45 | -0.91 | 0.7650 |
| Plekha6       | 1427149_at   | 0.0466 | -0.29 | 2.97  | 3.27  | 0.45 | -0.93 | 0.8156 |
| 1700001L19Rik | 1453643_at   | 0.0468 | -0.32 | 3.94  | 4.26  | 0.45 | -1.47 | 0.8014 |
| 1600014K23Rik | 1429793_at   | 0.0475 | -0.37 | 5.60  | 5.97  | 0.45 | -0.93 | 0.7746 |

|               |              |        |       |      |      |      |       |        |
|---------------|--------------|--------|-------|------|------|------|-------|--------|
| Nxph4         | 1429753_at   | 0.0478 | -0.53 | 6.07 | 6.60 | 0.45 | -0.91 | 0.6934 |
| Sh2d3c        | 1415886_at   | 0.0479 | -0.33 | 8.19 | 8.52 | 0.45 | -0.91 | 0.7955 |
| Ralgds        | 1460634_at   | 0.0480 | -0.35 | 9.48 | 9.83 | 0.45 | -0.98 | 0.7843 |
| Actn1         | 1427385_s_at | 0.0481 | -0.28 | 5.11 | 5.40 | 0.45 | -0.90 | 0.8211 |
| Med24         | 1431282_at   | 0.0482 | -0.29 | 4.28 | 4.57 | 0.45 | -0.91 | 0.8184 |
| Arhgap32      | 1457597_at   | 0.0484 | -0.29 | 4.49 | 4.78 | 0.45 | -0.90 | 0.8180 |
| Trim69        | 1418757_at   | 0.0486 | -0.34 | 5.25 | 5.59 | 0.45 | -0.92 | 0.7912 |
| Spopl         | 1459560_at   | 0.0489 | -0.27 | 8.01 | 8.28 | 0.45 | -0.90 | 0.8265 |
| Nfam1         | 1428790_at   | 0.0490 | -0.26 | 6.72 | 6.99 | 0.46 | -0.90 | 0.8329 |
| Skap2         | 1460623_at   | 0.0494 | -0.28 | 9.67 | 9.95 | 0.46 | -1.02 | 0.8223 |
| D17Wsu104e    | 1448440_x_at | 0.0497 | -0.28 | 8.83 | 9.11 | 0.46 | -1.03 | 0.8210 |
| B230104F01Rik | 1431496_at   | 0.0499 | -0.34 | 4.71 | 5.05 | 0.46 | -0.90 | 0.7915 |
| Slc30a1       | 1422786_at   | 0.0500 | -0.29 | 6.33 | 6.62 | 0.46 | -1.17 | 0.8165 |
| Tekt5         | 1429355_at   | 0.0500 | -0.27 | 6.19 | 6.46 | 0.46 | -0.91 | 0.8282 |

### Upregulated in *Crebbp<sup>fl/fl</sup> Cγ1-Cre*

|               |              |        |      |       |       |      |      |        |
|---------------|--------------|--------|------|-------|-------|------|------|--------|
| Dab2ip        | 1433558_at   | 0.0000 | 0.75 | 10.12 | 9.37  | 0.08 | 4.39 | 1.6850 |
| Thyn1         | 1438480_a_at | 0.0000 | 1.01 | 9.97  | 8.96  | 0.08 | 4.18 | 2.0144 |
| Mfsd6         | 1424464_s_at | 0.0000 | 0.90 | 8.63  | 7.73  | 0.08 | 4.21 | 1.8685 |
| Comt          | 1418701_at   | 0.0001 | 1.23 | 10.09 | 8.86  | 0.09 | 3.18 | 2.3414 |
| Tfdp2         | 1437174_at   | 0.0001 | 0.88 | 8.08  | 7.20  | 0.09 | 3.09 | 1.8435 |
| Kdelc1        | 1436443_a_at | 0.0001 | 1.11 | 8.58  | 7.47  | 0.09 | 3.05 | 2.1587 |
| Lmo4          | 1420981_a_at | 0.0001 | 0.72 | 10.37 | 9.65  | 0.09 | 3.08 | 1.6485 |
| Rell1         | 1427243_at   | 0.0001 | 0.37 | 10.79 | 10.42 | 0.09 | 2.97 | 1.2885 |
| Fmn2          | 1431725_at   | 0.0001 | 2.06 | 8.22  | 6.17  | 0.09 | 3.94 | 4.1613 |
| Evi5          | 1417512_at   | 0.0001 | 1.08 | 8.72  | 7.64  | 0.09 | 2.90 | 2.1145 |
| Lphn2         | 1434111_at   | 0.0001 | 1.53 | 8.13  | 6.59  | 0.09 | 3.22 | 2.8938 |
| Scmh1         | 1441573_at   | 0.0001 | 0.85 | 8.70  | 7.85  | 0.09 | 3.58 | 1.7968 |
| Acad8         | 1419262_at   | 0.0001 | 0.55 | 7.05  | 6.49  | 0.09 | 3.11 | 1.4684 |
| Ndufs4        | 1459760_at   | 0.0002 | 0.28 | 6.51  | 6.23  | 0.09 | 2.81 | 1.2147 |
| Clec16a       | 1455326_at   | 0.0002 | 1.19 | 8.15  | 6.96  | 0.09 | 3.14 | 2.2817 |
| Nedd4         | 1421955_a_at | 0.0002 | 1.05 | 10.03 | 8.97  | 0.09 | 4.45 | 2.0752 |
| Ppm1e         | 1434990_at   | 0.0002 | 1.17 | 7.78  | 6.61  | 0.09 | 3.38 | 2.2518 |
| Thbd          | 1448529_at   | 0.0002 | 0.87 | 7.78  | 6.91  | 0.10 | 2.83 | 1.8249 |
| Tmem136       | 1457701_at   | 0.0002 | 2.11 | 9.24  | 7.14  | 0.10 | 2.86 | 4.3052 |
| Nqo2          | 1449983_a_at | 0.0002 | 0.57 | 8.81  | 8.25  | 0.10 | 2.67 | 1.4799 |
| Rdx           | 1416180_a_at | 0.0002 | 1.00 | 7.20  | 6.20  | 0.10 | 2.69 | 2.0008 |
| Amer1         | 1439565_at   | 0.0002 | 0.45 | 9.91  | 9.45  | 0.10 | 2.67 | 1.3706 |
| Cul7          | 1417039_a_at | 0.0002 | 0.75 | 7.56  | 6.81  | 0.10 | 2.62 | 1.6833 |
| Ggh           | 1419595_a_at | 0.0002 | 0.75 | 7.19  | 6.44  | 0.10 | 2.65 | 1.6764 |
| Pi4k2b        | 1416489_at   | 0.0002 | 0.68 | 10.08 | 9.39  | 0.10 | 2.58 | 1.6035 |
| Pkp4          | 1452209_at   | 0.0003 | 0.38 | 12.03 | 11.65 | 0.11 | 2.64 | 1.2994 |
| Epb4.115      | 1439284_at   | 0.0003 | 0.82 | 9.53  | 8.70  | 0.11 | 2.51 | 1.7677 |
| Clstn1        | 1421861_at   | 0.0003 | 0.49 | 9.85  | 9.36  | 0.11 | 2.67 | 1.4033 |
| Tspan6        | 1448501_at   | 0.0003 | 0.74 | 5.14  | 4.40  | 0.11 | 2.71 | 1.6671 |
| 2210013O21Rik | 1430538_at   | 0.0004 | 0.33 | 10.60 | 10.27 | 0.11 | 2.78 | 1.2572 |
| Rp2h          | 1454816_at   | 0.0004 | 0.27 | 9.05  | 8.79  | 0.11 | 2.49 | 1.2033 |
| Rab12         | 1431931_a_at | 0.0004 | 0.53 | 7.56  | 7.03  | 0.11 | 3.04 | 1.4429 |
| Uxs1          | 1452011_a_at | 0.0004 | 0.42 | 9.28  | 8.86  | 0.11 | 2.38 | 1.3391 |
| Raph1         | 1434303_at   | 0.0004 | 0.91 | 10.42 | 9.50  | 0.11 | 2.54 | 1.8826 |
| BC030308      | 1440969_at   | 0.0005 | 0.46 | 7.93  | 7.47  | 0.12 | 2.97 | 1.3733 |
| D3Ertd254e    | 1455757_at   | 0.0006 | 0.45 | 8.42  | 7.97  | 0.12 | 2.47 | 1.3625 |
| Arhgef25      | 1419978_s_at | 0.0006 | 0.47 | 7.14  | 6.67  | 0.12 | 2.46 | 1.3890 |
| Inpp1         | 1460394_a_at | 0.0006 | 0.86 | 8.10  | 7.24  | 0.12 | 2.51 | 1.8103 |
| Ssx2ip        | 1448743_at   | 0.0006 | 0.45 | 9.82  | 9.37  | 0.12 | 2.97 | 1.3664 |
| Zfp820        | 1455786_at   | 0.0006 | 1.06 | 4.58  | 3.51  | 0.12 | 2.86 | 2.0899 |
| Spsb1         | 1449752_at   | 0.0007 | 0.77 | 7.35  | 6.57  | 0.13 | 2.19 | 1.7099 |
| Gfi1          | 1417679_at   | 0.0007 | 1.27 | 8.31  | 7.04  | 0.13 | 2.70 | 2.4165 |
| Spry2         | 1436584_at   | 0.0007 | 1.42 | 7.31  | 5.90  | 0.13 | 2.78 | 2.6689 |
| Ctsl          | 1451310_a_at | 0.0007 | 0.89 | 6.62  | 5.72  | 0.13 | 2.18 | 1.8579 |
| Eno2          | 1418829_a_at | 0.0007 | 1.26 | 7.39  | 6.13  | 0.13 | 2.22 | 2.3981 |
| Alg11         | 1434187_at   | 0.0007 | 0.26 | 9.96  | 9.69  | 0.13 | 2.53 | 1.1983 |
| Jmy           | 1420640_at   | 0.0008 | 0.44 | 9.04  | 8.60  | 0.13 | 2.14 | 1.3562 |
| Pfn2          | 1418210_at   | 0.0008 | 0.46 | 10.41 | 9.95  | 0.13 | 2.15 | 1.3794 |
| Pdlim1        | 1416554_at   | 0.0008 | 1.00 | 8.33  | 7.33  | 0.13 | 2.25 | 1.9989 |
| Cbr1          | 1460196_at   | 0.0008 | 0.71 | 8.71  | 8.00  | 0.13 | 2.12 | 1.6367 |
| D17H6S56E-5   | 1417822_at   | 0.0008 | 0.36 | 11.31 | 10.95 | 0.13 | 2.13 | 1.2852 |

|               |              |        |      |       |       |      |      |        |
|---------------|--------------|--------|------|-------|-------|------|------|--------|
| Gnb4          | 1419469_at   | 0.0008 | 0.63 | 7.89  | 7.26  | 0.13 | 2.12 | 1.5495 |
| Maoa          | 1428667_at   | 0.0009 | 0.51 | 6.25  | 5.74  | 0.13 | 2.52 | 1.4236 |
| Stxbp1        | 1420506_a_at | 0.0009 | 0.39 | 7.99  | 7.60  | 0.13 | 2.08 | 1.3115 |
| Pafah2        | 1448489_at   | 0.0009 | 0.41 | 8.19  | 7.78  | 0.13 | 2.07 | 1.3319 |
| Ag1           | 1429083_at   | 0.0009 | 0.28 | 6.41  | 6.13  | 0.13 | 2.17 | 1.2181 |
| C730049O14Rik | 1435084_at   | 0.0009 | 0.43 | 8.80  | 8.37  | 0.13 | 2.11 | 1.3468 |
| Nt5dc2        | 1424882_a_at | 0.0009 | 0.84 | 9.86  | 9.02  | 0.13 | 2.10 | 1.7887 |
| Mxi1          | 1450376_at   | 0.0009 | 0.90 | 9.10  | 8.20  | 0.13 | 2.07 | 1.8621 |
| Brwd1         | 1452321_at   | 0.0010 | 0.31 | 12.16 | 11.85 | 0.14 | 2.52 | 1.2415 |
| Tjp2          | 1450984_at   | 0.0010 | 0.39 | 8.00  | 7.61  | 0.14 | 2.06 | 1.3063 |
| Slc39a8       | 1416832_at   | 0.0010 | 1.11 | 6.50  | 5.39  | 0.14 | 2.48 | 2.1655 |
| Itm2a         | 1423608_at   | 0.0011 | 0.59 | 5.72  | 5.13  | 0.14 | 2.26 | 1.5036 |
| Arhgef12      | 1423902_s_at | 0.0011 | 0.29 | 11.38 | 11.09 | 0.14 | 2.81 | 1.2267 |
| Arap2         | 1452291_at   | 0.0011 | 0.39 | 10.18 | 9.79  | 0.14 | 2.45 | 1.3133 |
| Dirc2         | 1454654_at   | 0.0011 | 0.65 | 7.98  | 7.33  | 0.14 | 2.36 | 1.5741 |
| Kdm5b         | 1427142_s_at | 0.0011 | 1.38 | 8.01  | 6.64  | 0.14 | 2.64 | 2.5954 |
| Vcl           | 1416156_at   | 0.0011 | 0.88 | 9.57  | 8.69  | 0.14 | 2.65 | 1.8412 |
| Dcun1d4       | 1455079_at   | 0.0012 | 1.03 | 8.24  | 7.21  | 0.14 | 2.01 | 2.0443 |
| Ccdc88a       | 1437216_at   | 0.0012 | 0.91 | 9.47  | 8.57  | 0.15 | 2.04 | 1.8726 |
| 5930405F01Rik | 1441372_at   | 0.0012 | 1.02 | 7.47  | 6.45  | 0.15 | 2.00 | 2.0328 |
| Sorbs1        | 1428471_at   | 0.0012 | 0.54 | 8.43  | 7.89  | 0.15 | 1.99 | 1.4495 |
| Nmnat1        | 1429819_at   | 0.0013 | 0.28 | 8.62  | 8.35  | 0.15 | 1.98 | 1.2126 |
| Dnmt3a        | 1460324_at   | 0.0013 | 0.40 | 7.66  | 7.26  | 0.15 | 2.15 | 1.3218 |
| H6pd          | 1452145_at   | 0.0013 | 0.39 | 7.23  | 6.84  | 0.15 | 1.99 | 1.3103 |
| Rap2b         | 1439548_at   | 0.0014 | 0.54 | 7.96  | 7.42  | 0.15 | 1.97 | 1.4548 |
| Car2          | 1448752_at   | 0.0014 | 0.91 | 9.51  | 8.60  | 0.16 | 1.99 | 1.8787 |
| Clip1         | 1431098_at   | 0.0014 | 0.41 | 8.40  | 8.00  | 0.16 | 1.93 | 1.3246 |
| Pld6          | 1438493_at   | 0.0015 | 0.70 | 7.26  | 6.56  | 0.16 | 2.00 | 1.6270 |
| Fn3krp        | 1443050_at   | 0.0015 | 0.33 | 4.51  | 4.18  | 0.16 | 1.99 | 1.2592 |
| Bicd1         | 1438701_at   | 0.0015 | 1.69 | 7.28  | 5.59  | 0.16 | 3.45 | 3.2344 |
| Cdkn2a        | 1450140_a_at | 0.0016 | 0.41 | 6.70  | 6.29  | 0.16 | 1.91 | 1.3282 |
| Man1a2        | 1420977_at   | 0.0016 | 0.31 | 10.08 | 9.78  | 0.16 | 1.89 | 1.2384 |
| Trove2        | 1436534_at   | 0.0016 | 0.83 | 5.59  | 4.75  | 0.16 | 1.89 | 1.7834 |
| Glul          | 1426235_a_at | 0.0016 | 0.39 | 9.16  | 8.77  | 0.16 | 1.90 | 1.3141 |
| Dip2a         | 1452908_at   | 0.0016 | 0.53 | 10.50 | 9.97  | 0.16 | 1.88 | 1.4408 |
| Plekha1       | 1417965_at   | 0.0017 | 0.54 | 9.70  | 9.16  | 0.16 | 1.87 | 1.4531 |
| Tmem55a       | 1424293_s_at | 0.0017 | 1.07 | 9.55  | 8.48  | 0.16 | 2.32 | 2.1007 |
| Marcks        | 1415971_at   | 0.0017 | 0.53 | 10.65 | 10.12 | 0.16 | 2.11 | 1.4415 |
| Ank           | 1450627_at   | 0.0017 | 0.54 | 8.71  | 8.17  | 0.16 | 1.86 | 1.4584 |
| Ptpn9         | 1451037_at   | 0.0019 | 0.94 | 8.62  | 7.69  | 0.17 | 4.43 | 1.9138 |
| Mnd1          | 1452606_at   | 0.0019 | 0.33 | 11.26 | 10.93 | 0.17 | 1.86 | 1.2564 |
| Trim2         | 1417027_at   | 0.0019 | 0.95 | 7.56  | 6.61  | 0.17 | 1.85 | 1.9328 |
| Gm527         | 1439791_at   | 0.0019 | 0.36 | 5.32  | 4.96  | 0.17 | 1.86 | 1.2864 |
| Myo9a         | 1459991_at   | 0.0019 | 0.35 | 5.62  | 5.27  | 0.17 | 1.86 | 1.2735 |
| Ptgr1         | 1417777_at   | 0.0020 | 0.72 | 11.07 | 10.35 | 0.17 | 2.86 | 1.6459 |
| Meis2         | 1417129_a_at | 0.0020 | 0.51 | 4.83  | 4.32  | 0.18 | 1.81 | 1.4201 |
| Sdc1          | 1415943_at   | 0.0020 | 0.74 | 8.67  | 7.93  | 0.18 | 1.88 | 1.6717 |
| Ankrd39       | 1437499_at   | 0.0021 | 0.27 | 8.77  | 8.50  | 0.18 | 1.86 | 1.2076 |
| Phf21a        | 1441145_at   | 0.0022 | 0.35 | 9.54  | 9.19  | 0.18 | 1.78 | 1.2705 |
| Gabarapl1     | 1416418_at   | 0.0022 | 0.60 | 7.35  | 6.74  | 0.18 | 1.78 | 1.5210 |
| Rtkn2         | 1418108_at   | 0.0023 | 0.89 | 7.20  | 6.30  | 0.18 | 2.44 | 1.8556 |
| Zmat3         | 1449353_at   | 0.0023 | 0.48 | 10.32 | 9.84  | 0.18 | 2.06 | 1.3972 |
| Nnt           | 1416105_at   | 0.0024 | 0.69 | 9.56  | 8.87  | 0.18 | 2.63 | 1.6177 |
| Utrn          | 1452222_at   | 0.0024 | 0.87 | 8.98  | 8.11  | 0.18 | 1.80 | 1.8339 |
| Cryl1         | 1447112_s_at | 0.0024 | 0.43 | 6.76  | 6.34  | 0.18 | 1.78 | 1.3466 |
| Smim13        | 1433986_at   | 0.0024 | 0.53 | 9.19  | 8.65  | 0.18 | 1.78 | 1.4472 |
| Dzip1         | 1452793_at   | 0.0025 | 0.81 | 6.28  | 5.47  | 0.18 | 1.83 | 1.7513 |
| Bhlhb9        | 1428512_at   | 0.0025 | 0.44 | 10.09 | 9.64  | 0.18 | 2.12 | 1.3599 |
| 9430052A13Rik | 1433262_at   | 0.0026 | 0.28 | 5.32  | 5.04  | 0.19 | 1.75 | 1.2104 |
| Vat1          | 1423726_at   | 0.0026 | 0.51 | 8.28  | 7.77  | 0.19 | 1.72 | 1.4285 |
| Tmem159       | 1426436_at   | 0.0027 | 0.70 | 7.56  | 6.86  | 0.19 | 1.84 | 1.6245 |
| Insr          | 1434446_at   | 0.0027 | 0.48 | 8.43  | 7.95  | 0.19 | 2.45 | 1.3919 |
| Gnpda2        | 1426523_a_at | 0.0027 | 0.29 | 9.86  | 9.57  | 0.19 | 2.13 | 1.2199 |
| 6720422M22Rik | 1437798_at   | 0.0027 | 1.06 | 5.92  | 4.86  | 0.19 | 1.90 | 2.0876 |
| Fam92a        | 1451570_a_at | 0.0027 | 0.37 | 10.35 | 9.98  | 0.19 | 2.45 | 1.2903 |
| Rab32         | 1416527_at   | 0.0027 | 0.83 | 8.71  | 7.88  | 0.19 | 1.72 | 1.7751 |
| Kifap3        | 1417181_a_at | 0.0028 | 0.49 | 7.81  | 7.32  | 0.19 | 1.70 | 1.4028 |

|               |              |        |      |       |       |      |      |        |
|---------------|--------------|--------|------|-------|-------|------|------|--------|
| Gcsh          | 1432164_a_at | 0.0028 | 0.29 | 10.43 | 10.14 | 0.19 | 1.70 | 1.2199 |
| LOC674321     | 1432164_a_at | 0.0028 | 0.29 | 10.43 | 10.14 | 0.19 | 1.70 | 1.2199 |
| Fam210a       | 1436219_at   | 0.0028 | 0.44 | 7.98  | 7.54  | 0.19 | 2.10 | 1.3591 |
| Cysltr2       | 1421642_a_at | 0.0029 | 0.29 | 5.99  | 5.70  | 0.19 | 1.71 | 1.2231 |
| Gid4          | 1438541_at   | 0.0029 | 0.50 | 7.98  | 7.48  | 0.19 | 1.85 | 1.4122 |
| 9430099H24Rik | 1432806_at   | 0.0029 | 0.68 | 7.36  | 6.69  | 0.19 | 1.86 | 1.6001 |
| Brpf3         | 1435225_s_at | 0.0030 | 0.32 | 10.67 | 10.35 | 0.19 | 1.80 | 1.2491 |
| A930004D18Rik | 1439514_at   | 0.0030 | 0.95 | 6.83  | 5.87  | 0.19 | 1.70 | 1.9361 |
| Myl4          | 1422580_at   | 0.0030 | 0.36 | 12.96 | 12.60 | 0.20 | 1.71 | 1.2814 |
| lds           | 1434751_at   | 0.0030 | 0.46 | 6.67  | 6.22  | 0.20 | 1.97 | 1.3720 |
| LOC101056500  | 1432431_s_at | 0.0031 | 0.58 | 5.19  | 4.61  | 0.20 | 1.76 | 1.4956 |
| MacroD2       | 1432431_s_at | 0.0031 | 0.58 | 5.19  | 4.61  | 0.20 | 1.76 | 1.4956 |
| Slc25a24      | 1452717_at   | 0.0031 | 1.24 | 7.95  | 6.71  | 0.20 | 1.94 | 2.3699 |
| Sgcb          | 1419668_at   | 0.0031 | 0.53 | 7.28  | 6.75  | 0.20 | 1.79 | 1.4444 |
| Ip6k2         | 1428373_at   | 0.0032 | 0.43 | 8.58  | 8.15  | 0.20 | 1.80 | 1.3449 |
| Dhrs7         | 1426440_at   | 0.0034 | 0.42 | 8.84  | 8.42  | 0.21 | 1.65 | 1.3399 |
| Acpl2         | 1456735_x_at | 0.0035 | 1.00 | 6.08  | 5.08  | 0.21 | 1.73 | 2.0030 |
| 4933439C10Rik | 1456408_x_at | 0.0035 | 0.33 | 6.54  | 6.21  | 0.21 | 1.90 | 1.2540 |
| Akap12        | 1419706_a_at | 0.0036 | 0.32 | 12.62 | 12.30 | 0.21 | 1.84 | 1.2474 |
| Irf6          | 1418301_at   | 0.0036 | 0.85 | 6.36  | 5.50  | 0.21 | 1.63 | 1.8084 |
| 0610010F05Rik | 1428652_at   | 0.0036 | 0.37 | 9.50  | 9.13  | 0.21 | 1.62 | 1.2928 |
| Sccpdh        | 1426510_at   | 0.0037 | 0.93 | 8.93  | 8.00  | 0.21 | 1.91 | 1.9083 |
| Spred1        | 1452911_at   | 0.0037 | 0.90 | 9.36  | 8.46  | 0.21 | 2.80 | 1.8705 |
| Dimt1         | 1426291_at   | 0.0037 | 0.29 | 8.32  | 8.04  | 0.21 | 2.33 | 1.2191 |
| Dennd5a       | 1424015_at   | 0.0038 | 0.52 | 9.41  | 8.89  | 0.21 | 2.72 | 1.4349 |
| Mpzl1         | 1428167_a_at | 0.0039 | 0.62 | 8.66  | 8.04  | 0.21 | 2.10 | 1.5386 |
| Armcx4        | 1427167_at   | 0.0039 | 1.24 | 7.61  | 6.37  | 0.21 | 3.21 | 2.3608 |
| Hsd17b10      | 1448286_at   | 0.0040 | 0.32 | 11.20 | 10.88 | 0.21 | 1.60 | 1.2483 |
| Tbc1d19       | 1424918_at   | 0.0040 | 0.73 | 8.73  | 8.00  | 0.21 | 1.73 | 1.6552 |
| Zdhhc2        | 1452655_at   | 0.0041 | 0.46 | 8.31  | 7.85  | 0.22 | 1.66 | 1.3764 |
| D7ErtD558e    | 1458769_at   | 0.0042 | 0.67 | 8.48  | 7.80  | 0.22 | 1.86 | 1.5957 |
| Hsd17b4       | 1417369_at   | 0.0043 | 0.27 | 9.29  | 9.02  | 0.22 | 1.64 | 1.2039 |
| LOC101056649  | 1427434_at   | 0.0043 | 0.38 | 8.13  | 7.76  | 0.22 | 1.67 | 1.2970 |
| Naip6         | 1427434_at   | 0.0043 | 0.38 | 8.13  | 7.76  | 0.22 | 1.67 | 1.2970 |
| Naip7         | 1427434_at   | 0.0043 | 0.38 | 8.13  | 7.76  | 0.22 | 1.67 | 1.2970 |
| Plekhh1       | 1447807_s_at | 0.0043 | 0.46 | 8.43  | 7.97  | 0.22 | 1.57 | 1.3780 |
| ldh1          | 1422433_s_at | 0.0044 | 0.33 | 11.09 | 10.76 | 0.22 | 2.47 | 1.2564 |
| Slc16a10      | 1436368_at   | 0.0044 | 0.66 | 7.25  | 6.59  | 0.22 | 1.57 | 1.5754 |
| Bbs7          | 1454684_at   | 0.0045 | 0.52 | 6.62  | 6.10  | 0.22 | 1.57 | 1.4365 |
| Trim37        | 1434554_at   | 0.0046 | 0.31 | 10.14 | 9.83  | 0.23 | 1.62 | 1.2422 |
| Hic2          | 1437571_at   | 0.0046 | 0.51 | 6.10  | 5.59  | 0.23 | 1.69 | 1.4276 |
| Gbf1          | 1432676_at   | 0.0047 | 0.42 | 7.28  | 6.86  | 0.23 | 1.61 | 1.3401 |
| Arhgap29      | 1444512_at   | 0.0049 | 0.43 | 4.83  | 4.39  | 0.23 | 1.70 | 1.3481 |
| Itga8         | 1454966_at   | 0.0049 | 0.28 | 3.31  | 3.04  | 0.23 | 1.56 | 1.2102 |
| Zfp318        | 1430558_at   | 0.0050 | 0.50 | 8.41  | 7.91  | 0.23 | 1.61 | 1.4103 |
| Usp31         | 1419828_at   | 0.0050 | 0.36 | 5.62  | 5.26  | 0.24 | 1.57 | 1.2872 |
| Hmgcll1       | 1434913_at   | 0.0051 | 1.12 | 5.31  | 4.19  | 0.24 | 1.52 | 2.1764 |
| Trps1         | 1438214_at   | 0.0052 | 1.11 | 8.68  | 7.56  | 0.24 | 1.79 | 2.1644 |
| Mxd1          | 1434830_at   | 0.0052 | 0.47 | 8.65  | 8.18  | 0.24 | 1.61 | 1.3879 |
| Rprd1a        | 1454964_at   | 0.0053 | 0.53 | 9.94  | 9.40  | 0.24 | 1.51 | 1.4448 |
| Glo1          | 1436070_at   | 0.0054 | 0.39 | 7.75  | 7.36  | 0.24 | 1.75 | 1.3099 |
| 4930430F08Rik | 1453468_at   | 0.0054 | 0.54 | 7.31  | 6.77  | 0.24 | 1.50 | 1.4536 |
| Cpm           | 1453009_at   | 0.0055 | 0.49 | 10.68 | 10.19 | 0.24 | 2.85 | 1.4000 |
| Map4k3        | 1446798_at   | 0.0055 | 0.81 | 5.61  | 4.80  | 0.24 | 2.20 | 1.7519 |
| Ccdc109b      | 1418778_at   | 0.0055 | 0.67 | 7.18  | 6.51  | 0.24 | 1.69 | 1.5935 |
| 4930513N10Rik | 1442152_at   | 0.0056 | 0.65 | 8.16  | 7.52  | 0.24 | 1.73 | 1.5660 |
| A930035D04Rik | 1436942_at   | 0.0056 | 0.39 | 7.18  | 6.79  | 0.24 | 1.58 | 1.3072 |
| Zmynd11       | 1436153_a_at | 0.0057 | 0.85 | 9.04  | 8.18  | 0.25 | 1.56 | 1.8066 |
| Ldlrad4       | 1452343_at   | 0.0058 | 0.57 | 7.63  | 7.07  | 0.25 | 1.79 | 1.4802 |
| Bivm          | 1434288_at   | 0.0058 | 0.41 | 6.44  | 6.03  | 0.25 | 1.68 | 1.3297 |
| Tmlhe         | 1420726_x_at | 0.0060 | 0.52 | 3.12  | 2.60  | 0.25 | 1.72 | 1.4338 |
| Klhl23        | 1435743_at   | 0.0061 | 1.19 | 6.70  | 5.52  | 0.25 | 2.30 | 2.2777 |
| Nxn           | 1422465_a_at | 0.0062 | 0.50 | 7.94  | 7.44  | 0.26 | 1.53 | 1.4155 |
| Ptpn21        | 1419054_a_at | 0.0063 | 0.42 | 6.82  | 6.40  | 0.26 | 1.66 | 1.3344 |
| Armcx2        | 1415780_a_at | 0.0063 | 0.49 | 8.29  | 7.80  | 0.26 | 1.51 | 1.4035 |
| Slk           | 1433999_at   | 0.0064 | 0.29 | 10.99 | 10.70 | 0.26 | 1.53 | 1.2262 |
| Flrt3         | 1429310_at   | 0.0064 | 0.33 | 4.00  | 3.66  | 0.26 | 1.76 | 1.2606 |

|               |              |        |      |       |       |      |      |        |
|---------------|--------------|--------|------|-------|-------|------|------|--------|
| Prkar2a       | 1428783_at   | 0.0065 | 0.39 | 9.48  | 9.08  | 0.26 | 1.47 | 1.3118 |
| Dcbld2        | 1437635_at   | 0.0065 | 0.65 | 8.81  | 8.16  | 0.26 | 1.98 | 1.5723 |
| Gpx7          | 1417836_at   | 0.0065 | 0.91 | 7.14  | 6.23  | 0.26 | 1.78 | 1.8808 |
| Gspt2         | 1418109_at   | 0.0066 | 0.39 | 4.51  | 4.12  | 0.26 | 1.53 | 1.3082 |
| Enah          | 1424800_at   | 0.0066 | 0.94 | 6.25  | 5.31  | 0.26 | 1.58 | 1.9187 |
| Pls3          | 1423725_at   | 0.0066 | 1.49 | 6.32  | 4.83  | 0.26 | 1.88 | 2.8156 |
| Smyd2         | 1424760_a_at | 0.0066 | 0.66 | 8.82  | 8.16  | 0.26 | 1.47 | 1.5806 |
| E030024N20Rik | 1430386_at   | 0.0067 | 0.49 | 9.39  | 8.90  | 0.26 | 1.46 | 1.4036 |
| Tulp3         | 1449008_at   | 0.0067 | 0.30 | 9.79  | 9.49  | 0.26 | 1.45 | 1.2322 |
| Otud7b        | 1428953_at   | 0.0067 | 0.44 | 9.57  | 9.13  | 0.26 | 1.78 | 1.3560 |
| Plekha8       | 1454819_at   | 0.0067 | 0.95 | 8.53  | 7.58  | 0.26 | 1.44 | 1.9377 |
| Zdhhc23       | 1441069_at   | 0.0071 | 0.34 | 8.81  | 8.47  | 0.27 | 1.85 | 1.2661 |
| Dst           | 1423626_at   | 0.0071 | 1.30 | 7.22  | 5.92  | 0.27 | 1.66 | 2.4612 |
| Csnk2a1       | 1419035_s_at | 0.0071 | 0.39 | 8.69  | 8.30  | 0.27 | 1.63 | 1.3117 |
| LOC100047957  | 1419035_s_at | 0.0071 | 0.39 | 8.69  | 8.30  | 0.27 | 1.63 | 1.3117 |
| Cttn          | 1421315_s_at | 0.0071 | 0.75 | 8.90  | 8.15  | 0.27 | 2.21 | 1.6854 |
| AW209491      | 1423512_at   | 0.0072 | 0.27 | 8.20  | 7.92  | 0.27 | 1.51 | 1.2094 |
| Nudt4         | 1449107_at   | 0.0073 | 0.40 | 8.80  | 8.39  | 0.27 | 1.43 | 1.3230 |
| Dnajc12       | 1417441_at   | 0.0074 | 0.92 | 6.71  | 5.80  | 0.27 | 1.65 | 1.8911 |
| Cdk7          | 1458987_at   | 0.0074 | 0.41 | 5.41  | 5.00  | 0.27 | 1.88 | 1.3266 |
| Abcc5         | 1435685_x_at | 0.0074 | 0.50 | 8.62  | 8.13  | 0.27 | 1.98 | 1.4098 |
| Acer3         | 1429520_a_at | 0.0077 | 0.44 | 7.89  | 7.45  | 0.27 | 1.43 | 1.3577 |
| Cers6         | 1434418_at   | 0.0077 | 0.48 | 11.25 | 10.78 | 0.27 | 1.40 | 1.3923 |
| Ccdc30        | 1430190_at   | 0.0079 | 0.72 | 5.88  | 5.16  | 0.28 | 1.84 | 1.6458 |
| Prmt2         | 1437234_x_at | 0.0079 | 1.08 | 9.07  | 7.99  | 0.28 | 2.78 | 2.1101 |
| Flot2         | 1417544_a_at | 0.0079 | 0.26 | 9.30  | 9.04  | 0.28 | 1.66 | 1.2001 |
| Ear11         | 1425295_at   | 0.0080 | 0.26 | 3.21  | 2.94  | 0.28 | 1.39 | 1.1990 |
| Bphl          | 1424242_at   | 0.0081 | 0.38 | 8.98  | 8.59  | 0.28 | 1.65 | 1.3027 |
| Magee1        | 1422431_at   | 0.0081 | 0.60 | 6.29  | 5.69  | 0.28 | 1.39 | 1.5161 |
| Rab39b        | 1435014_at   | 0.0082 | 1.15 | 6.66  | 5.51  | 0.28 | 1.49 | 2.2242 |
| Ttk           | 1442594_at   | 0.0083 | 0.32 | 10.46 | 10.14 | 0.28 | 2.15 | 1.2477 |
| Dnaja4        | 1418591_at   | 0.0084 | 0.83 | 6.32  | 5.49  | 0.29 | 1.37 | 1.7736 |
| Faah          | 1434091_at   | 0.0085 | 0.88 | 7.40  | 6.51  | 0.29 | 1.51 | 1.8435 |
| Dut           | 1419269_at   | 0.0085 | 0.27 | 10.32 | 10.06 | 0.29 | 1.43 | 1.2018 |
| Prg3          | 1449924_at   | 0.0086 | 0.43 | 7.24  | 6.81  | 0.29 | 1.37 | 1.3486 |
| Eef2k         | 1437829_s_at | 0.0086 | 0.79 | 9.06  | 8.26  | 0.29 | 1.39 | 1.7328 |
| Maged1        | 1450062_a_at | 0.0086 | 0.36 | 8.95  | 8.59  | 0.29 | 1.37 | 1.2791 |
| Kif3a         | 1420375_at   | 0.0087 | 0.33 | 7.08  | 6.75  | 0.29 | 1.41 | 1.2548 |
| Fam168a       | 1454950_at   | 0.0088 | 0.27 | 7.97  | 7.69  | 0.29 | 1.37 | 1.2088 |
| Rad52         | 1426296_at   | 0.0088 | 0.31 | 8.44  | 8.13  | 0.29 | 1.44 | 1.2423 |
| Zfp763        | 1434675_at   | 0.0088 | 0.38 | 10.44 | 10.06 | 0.29 | 1.44 | 1.3026 |
| Aamdc         | 1451381_at   | 0.0089 | 0.29 | 9.08  | 8.79  | 0.29 | 1.41 | 1.2240 |
| Selenbp1      | 1450699_at   | 0.0089 | 0.33 | 6.74  | 6.41  | 0.29 | 1.50 | 1.2590 |
| Decr1         | 1419367_at   | 0.0091 | 0.42 | 10.31 | 9.90  | 0.30 | 1.35 | 1.3349 |
| Iglv1         | 1427292_at   | 0.0093 | 0.31 | 12.11 | 11.80 | 0.30 | 2.03 | 1.2439 |
| Fads2         | 1419031_at   | 0.0095 | 0.34 | 10.62 | 10.28 | 0.30 | 1.34 | 1.2626 |
| Tnfrsf10b     | 1421296_at   | 0.0095 | 0.70 | 5.80  | 5.09  | 0.30 | 1.40 | 1.6270 |
| Ypel2         | 1434277_a_at | 0.0096 | 0.61 | 10.45 | 9.84  | 0.30 | 1.38 | 1.5215 |
| Rnf125        | 1429399_at   | 0.0097 | 0.44 | 8.00  | 7.55  | 0.30 | 1.48 | 1.3607 |
| Elovl6        | 1417403_at   | 0.0098 | 0.36 | 7.60  | 7.24  | 0.30 | 1.37 | 1.2876 |
| Gprasp1       | 1424455_at   | 0.0098 | 0.89 | 8.95  | 8.06  | 0.30 | 1.53 | 1.8488 |
| Ccdc25        | 1451799_at   | 0.0098 | 0.78 | 9.04  | 8.26  | 0.30 | 1.60 | 1.7120 |
| Usp49         | 1453037_at   | 0.0098 | 0.26 | 10.46 | 10.19 | 0.30 | 1.52 | 1.1999 |
| Smad3         | 1454960_at   | 0.0100 | 0.50 | 9.65  | 9.15  | 0.30 | 1.43 | 1.4189 |
| 4930480K15Rik | 1431858_at   | 0.0100 | 0.34 | 3.17  | 2.83  | 0.30 | 1.33 | 1.2671 |
| Cnnm3         | 1420481_at   | 0.0100 | 0.52 | 10.54 | 10.02 | 0.30 | 1.35 | 1.4382 |
| Lrrc28        | 1433858_at   | 0.0101 | 0.38 | 8.88  | 8.50  | 0.30 | 1.75 | 1.2982 |
| Zfp248        | 1453531_at   | 0.0102 | 0.34 | 5.92  | 5.57  | 0.30 | 1.57 | 1.2696 |
| Zfp40         | 1435984_at   | 0.0103 | 0.44 | 10.92 | 10.48 | 0.31 | 1.35 | 1.3597 |
| March5        | 1452925_a_at | 0.0105 | 0.31 | 9.81  | 9.50  | 0.31 | 1.31 | 1.2361 |
| Tmem191c      | 1420192_at   | 0.0105 | 0.94 | 7.93  | 6.99  | 0.31 | 1.68 | 1.9144 |
| Vangl1        | 1427234_at   | 0.0106 | 0.39 | 6.36  | 5.97  | 0.31 | 1.42 | 1.3121 |
| Ick           | 1455687_at   | 0.0106 | 0.75 | 6.47  | 5.72  | 0.31 | 1.88 | 1.6816 |
| Rab33a        | 1417529_at   | 0.0106 | 0.64 | 6.04  | 5.40  | 0.31 | 1.31 | 1.5579 |
| Tmem201       | 1454868_at   | 0.0106 | 0.35 | 8.80  | 8.45  | 0.31 | 1.52 | 1.2702 |
| Raet1a        | 1420603_s_at | 0.0108 | 0.54 | 8.87  | 8.33  | 0.31 | 1.31 | 1.4532 |
| Raet1b        | 1420603_s_at | 0.0108 | 0.54 | 8.87  | 8.33  | 0.31 | 1.31 | 1.4532 |

|               |              |        |      |       |       |      |      |        |
|---------------|--------------|--------|------|-------|-------|------|------|--------|
| Raet1c        | 1420603_s_at | 0.0108 | 0.54 | 8.87  | 8.33  | 0.31 | 1.31 | 1.4532 |
| Raet1d        | 1420603_s_at | 0.0108 | 0.54 | 8.87  | 8.33  | 0.31 | 1.31 | 1.4532 |
| Raet1e        | 1420603_s_at | 0.0108 | 0.54 | 8.87  | 8.33  | 0.31 | 1.31 | 1.4532 |
| Cnksr3        | 1433983_at   | 0.0108 | 0.45 | 6.80  | 6.35  | 0.31 | 1.34 | 1.3707 |
| Slc25a13      | 1449481_at   | 0.0109 | 0.38 | 10.32 | 9.94  | 0.31 | 1.32 | 1.3007 |
| Cd1d1         | 1449130_at   | 0.0109 | 0.71 | 7.02  | 6.31  | 0.31 | 1.31 | 1.6411 |
| Prkaca        | 1450519_a_at | 0.0109 | 0.30 | 12.06 | 11.76 | 0.31 | 2.32 | 1.2293 |
| 4930432F04Rik | 1425311_at   | 0.0109 | 0.27 | 6.74  | 6.47  | 0.31 | 1.31 | 1.2020 |
| Tmem41b       | 1437402_x_at | 0.0109 | 0.35 | 10.50 | 10.15 | 0.31 | 1.73 | 1.2733 |
| 2900057C01Rik | 1454384_at   | 0.0112 | 0.44 | 6.38  | 5.94  | 0.31 | 1.38 | 1.3579 |
| Zfp827        | 1439493_at   | 0.0113 | 0.95 | 8.24  | 7.29  | 0.31 | 1.34 | 1.9360 |
| Gtf2ird1      | 1460364_at   | 0.0113 | 0.50 | 7.11  | 6.61  | 0.31 | 1.65 | 1.4140 |
| Cox6b2        | 1435275_at   | 0.0114 | 0.33 | 8.59  | 8.26  | 0.31 | 1.32 | 1.2585 |
| Jazf1         | 1433894_at   | 0.0114 | 0.41 | 8.50  | 8.09  | 0.31 | 1.54 | 1.3272 |
| Mpp5          | 1434954_at   | 0.0115 | 0.28 | 9.47  | 9.18  | 0.31 | 1.34 | 1.2163 |
| Tet2          | 1438781_at   | 0.0117 | 0.52 | 8.65  | 8.14  | 0.31 | 1.32 | 1.4293 |
| Tpmt          | 1430889_a_at | 0.0117 | 0.33 | 6.46  | 6.13  | 0.31 | 1.30 | 1.2612 |
| Gm4349        | 1443245_at   | 0.0118 | 0.80 | 6.97  | 6.17  | 0.31 | 1.66 | 1.7449 |
| Chpt1         | 1455901_at   | 0.0118 | 0.71 | 4.10  | 3.39  | 0.31 | 1.45 | 1.6363 |
| Cntln         | 1451469_at   | 0.0118 | 0.87 | 6.17  | 5.31  | 0.31 | 1.50 | 1.8242 |
| Cited1        | 1449031_at   | 0.0119 | 0.47 | 5.65  | 5.18  | 0.31 | 1.42 | 1.3895 |
| Cand2         | 1429621_at   | 0.0119 | 0.45 | 7.86  | 7.41  | 0.31 | 2.12 | 1.3657 |
| Lrba          | 1451887_at   | 0.0119 | 0.36 | 6.61  | 6.25  | 0.31 | 1.59 | 1.2857 |
| Frrs1         | 1423465_at   | 0.0120 | 0.65 | 10.31 | 9.67  | 0.31 | 1.49 | 1.5643 |
| Fech          | 1418698_a_at | 0.0120 | 0.26 | 9.52  | 9.26  | 0.31 | 1.46 | 1.1984 |
| Arhgap18      | 1426952_at   | 0.0121 | 0.74 | 6.79  | 6.05  | 0.31 | 1.31 | 1.6700 |
| Krt1          | 1422481_at   | 0.0121 | 0.69 | 5.28  | 4.59  | 0.31 | 1.46 | 1.6165 |
| 2210419D22Rik | 1428500_at   | 0.0123 | 0.45 | 11.38 | 10.93 | 0.32 | 1.29 | 1.3626 |
| Lrp6          | 1428500_at   | 0.0123 | 0.45 | 11.38 | 10.93 | 0.32 | 1.29 | 1.3626 |
| Rsu1          | 1457220_at   | 0.0124 | 0.29 | 6.72  | 6.42  | 0.32 | 1.27 | 1.2235 |
| Zfp647        | 1455633_at   | 0.0126 | 0.47 | 6.26  | 5.79  | 0.32 | 1.47 | 1.3838 |
| Agphd1        | 1435691_at   | 0.0126 | 0.71 | 6.13  | 5.42  | 0.32 | 2.10 | 1.6408 |
| Armc8         | 1434949_at   | 0.0126 | 0.30 | 8.71  | 8.42  | 0.32 | 1.27 | 1.2291 |
| Galc          | 1452907_at   | 0.0127 | 0.59 | 6.57  | 5.99  | 0.32 | 1.90 | 1.5023 |
| Nisch         | 1451338_at   | 0.0127 | 0.43 | 9.47  | 9.03  | 0.32 | 1.54 | 1.3502 |
| Rps6kc1       | 1434563_at   | 0.0128 | 0.43 | 7.05  | 6.62  | 0.32 | 1.33 | 1.3449 |
| Ncapd3        | 1430782_at   | 0.0129 | 0.43 | 7.67  | 7.24  | 0.32 | 1.31 | 1.3470 |
| Megf9         | 1455960_at   | 0.0129 | 0.30 | 3.36  | 3.05  | 0.32 | 1.34 | 1.2339 |
| Zfp458        | 1445824_at   | 0.0130 | 0.54 | 6.80  | 6.26  | 0.32 | 1.26 | 1.4493 |
| Morn4         | 1434943_at   | 0.0130 | 0.56 | 7.22  | 6.66  | 0.32 | 1.26 | 1.4735 |
| Celf4         | 1452240_at   | 0.0134 | 0.89 | 6.14  | 5.25  | 0.33 | 1.82 | 1.8540 |
| Atp10a        | 1452013_at   | 0.0135 | 0.45 | 9.95  | 9.49  | 0.33 | 1.31 | 1.3698 |
| Rgs11         | 1425245_a_at | 0.0135 | 0.31 | 5.61  | 5.29  | 0.33 | 1.29 | 1.2433 |
| Eif4e3        | 1417978_at   | 0.0135 | 0.44 | 6.80  | 6.35  | 0.33 | 1.26 | 1.3585 |
| Mb21d2        | 1439014_at   | 0.0136 | 0.87 | 6.78  | 5.91  | 0.33 | 1.24 | 1.8295 |
| Bcl7c         | 1447139_at   | 0.0136 | 0.53 | 5.27  | 4.74  | 0.33 | 1.24 | 1.4396 |
| 5730409N24Rik | 1430362_at   | 0.0136 | 0.58 | 5.49  | 4.92  | 0.33 | 1.45 | 1.4933 |
| Vsig10        | 1436591_at   | 0.0137 | 0.60 | 7.41  | 6.82  | 0.33 | 1.24 | 1.5117 |
| Cry1          | 1433733_a_at | 0.0138 | 0.42 | 9.15  | 8.72  | 0.33 | 1.31 | 1.3423 |
| 4632427E13Rik | 1429331_at   | 0.0138 | 0.35 | 9.72  | 9.37  | 0.33 | 1.25 | 1.2764 |
| Gls           | 1434657_at   | 0.0139 | 0.30 | 10.05 | 9.75  | 0.33 | 1.23 | 1.2316 |
| Csrnp2        | 1434532_at   | 0.0140 | 0.47 | 9.91  | 9.44  | 0.33 | 1.25 | 1.3857 |
| Spg20         | 1424876_s_at | 0.0140 | 0.35 | 7.75  | 7.40  | 0.33 | 1.24 | 1.2779 |
| Vkorc1l1      | 1429092_at   | 0.0140 | 0.28 | 10.21 | 9.93  | 0.33 | 1.83 | 1.2154 |
| Ehd2          | 1435785_at   | 0.0140 | 0.36 | 10.74 | 10.38 | 0.33 | 1.29 | 1.2867 |
| Med12l        | 1452864_at   | 0.0143 | 0.40 | 7.38  | 6.98  | 0.33 | 1.23 | 1.3163 |
| Slc19a2       | 1441315_s_at | 0.0145 | 0.40 | 9.11  | 8.71  | 0.33 | 1.28 | 1.3188 |
| March8        | 1428385_at   | 0.0145 | 0.43 | 8.14  | 7.71  | 0.33 | 1.29 | 1.3507 |
| LOC100047518  | 1455871_s_at | 0.0146 | 0.49 | 10.73 | 10.25 | 0.33 | 1.55 | 1.4006 |
| Rpl13         | 1455871_s_at | 0.0146 | 0.49 | 10.73 | 10.25 | 0.33 | 1.55 | 1.4006 |
| Tax1bp3       | 1455871_s_at | 0.0146 | 0.49 | 10.73 | 10.25 | 0.33 | 1.55 | 1.4006 |
| Pigf          | 1448896_at   | 0.0146 | 0.32 | 11.07 | 10.75 | 0.33 | 1.22 | 1.2466 |
| LOC101056614  | 1421525_a_at | 0.0148 | 0.74 | 7.02  | 6.28  | 0.33 | 1.54 | 1.6737 |
| Naip5         | 1421525_a_at | 0.0148 | 0.74 | 7.02  | 6.28  | 0.33 | 1.54 | 1.6737 |
| Pbx3          | 1447640_s_at | 0.0148 | 0.50 | 9.16  | 8.66  | 0.33 | 1.51 | 1.4126 |
| Eid1          | 1448405_a_at | 0.0149 | 0.34 | 9.99  | 9.65  | 0.34 | 1.24 | 1.2666 |
| Gstm1         | 1448330_at   | 0.0150 | 0.26 | 5.54  | 5.27  | 0.34 | 1.26 | 1.2016 |



|               |              |        |      |       |       |      |      |        |
|---------------|--------------|--------|------|-------|-------|------|------|--------|
| Gm3556        | 1456687_at   | 0.0150 | 0.27 | 9.19  | 8.92  | 0.34 | 1.22 | 1.2066 |
| Bmpr2         | 1434310_at   | 0.0151 | 0.46 | 6.39  | 5.94  | 0.34 | 1.47 | 1.3717 |
| Rnf38         | 1431993_a_at | 0.0151 | 0.51 | 7.35  | 6.84  | 0.34 | 1.25 | 1.4213 |
| Smad1         | 1448208_at   | 0.0151 | 0.85 | 9.31  | 8.47  | 0.34 | 1.33 | 1.7983 |
| Mpp7          | 1455179_at   | 0.0153 | 0.48 | 8.37  | 7.89  | 0.34 | 1.36 | 1.3912 |
| Zfp516        | 1437921_x_at | 0.0154 | 0.59 | 7.69  | 7.10  | 0.34 | 1.38 | 1.5054 |
| E130107B13Rik | 1441668_at   | 0.0154 | 0.53 | 7.75  | 7.22  | 0.34 | 1.42 | 1.4481 |
| Tmtc1         | 1435261_at   | 0.0154 | 0.55 | 5.70  | 5.16  | 0.34 | 1.25 | 1.4596 |
| Ogt           | 1425517_s_at | 0.0156 | 0.32 | 11.00 | 10.68 | 0.34 | 1.26 | 1.2477 |
| Rcn1          | 1417090_at   | 0.0157 | 0.63 | 8.39  | 7.76  | 0.34 | 1.20 | 1.5517 |
| Klhl7         | 1452660_s_at | 0.0157 | 0.50 | 7.54  | 7.04  | 0.34 | 1.43 | 1.4129 |
| Dsel          | 1438407_at   | 0.0158 | 0.99 | 7.29  | 6.30  | 0.34 | 1.22 | 1.9913 |
| Rims2         | 1436470_at   | 0.0158 | 0.33 | 3.77  | 3.44  | 0.34 | 1.23 | 1.2605 |
| Echdc2        | 1425788_a_at | 0.0158 | 0.33 | 6.77  | 6.44  | 0.34 | 1.56 | 1.2556 |
| Ndufaf2       | 1452923_at   | 0.0159 | 0.33 | 10.71 | 10.38 | 0.34 | 1.50 | 1.2553 |
| C230085N15Rik | 1457656_s_at | 0.0160 | 0.64 | 8.88  | 8.24  | 0.34 | 1.25 | 1.5579 |
| Intu          | 1454350_at   | 0.0160 | 0.65 | 5.54  | 4.89  | 0.34 | 1.61 | 1.5717 |
| Mob3b         | 1429284_at   | 0.0161 | 0.56 | 7.72  | 7.16  | 0.34 | 1.22 | 1.4754 |
| Egln1         | 1423785_at   | 0.0161 | 0.60 | 10.70 | 10.10 | 0.34 | 1.42 | 1.5155 |
| Vwa5a         | 1426221_at   | 0.0162 | 0.89 | 7.81  | 6.92  | 0.34 | 1.31 | 1.8557 |
| Dedd          | 1434994_at   | 0.0162 | 0.37 | 9.62  | 9.25  | 0.34 | 1.53 | 1.2904 |
| Nipa1         | 1434864_at   | 0.0162 | 0.45 | 5.56  | 5.11  | 0.34 | 1.42 | 1.3684 |
| Dcun1d3       | 1437763_at   | 0.0165 | 0.32 | 8.43  | 8.12  | 0.34 | 1.24 | 1.2447 |
| Plcx1         | 1437842_at   | 0.0165 | 0.42 | 6.90  | 6.48  | 0.34 | 1.51 | 1.3405 |
| Notch1        | 1418633_at   | 0.0165 | 0.54 | 6.79  | 6.25  | 0.34 | 1.19 | 1.4525 |
| Zxda          | 1439077_at   | 0.0166 | 0.39 | 8.36  | 7.97  | 0.34 | 1.24 | 1.3109 |
| Zc3hav11      | 1456756_at   | 0.0166 | 0.64 | 8.12  | 7.48  | 0.34 | 1.18 | 1.5597 |
| Wls           | 1423825_at   | 0.0167 | 0.44 | 4.41  | 3.97  | 0.34 | 1.27 | 1.3550 |
| Plin2         | 1448318_at   | 0.0169 | 0.51 | 8.31  | 7.80  | 0.34 | 1.20 | 1.4213 |
| Nudt16l1      | 1437624_x_at | 0.0170 | 0.28 | 11.87 | 11.59 | 0.34 | 1.21 | 1.2123 |
| 5230400M03Rik | 1437493_at   | 0.0170 | 0.32 | 6.44  | 6.13  | 0.34 | 1.18 | 1.2444 |
| Purg          | 1424970_at   | 0.0170 | 0.65 | 7.93  | 7.28  | 0.34 | 1.47 | 1.5650 |
| Igll2         | 1447918_x_at | 0.0172 | 0.29 | 9.87  | 9.57  | 0.35 | 1.25 | 1.2260 |
| Ahnak         | 1452217_at   | 0.0172 | 0.82 | 10.90 | 10.08 | 0.35 | 1.26 | 1.7649 |
| Dync1li2      | 1433926_at   | 0.0173 | 0.28 | 10.31 | 10.03 | 0.35 | 1.17 | 1.2168 |
| Zfp518b       | 1452340_at   | 0.0173 | 0.34 | 9.53  | 9.18  | 0.35 | 1.23 | 1.2699 |
| Ttc30a2       | 1455921_at   | 0.0174 | 0.67 | 3.96  | 3.29  | 0.35 | 1.17 | 1.5929 |
| D930016D06Rik | 1424861_at   | 0.0174 | 0.32 | 10.28 | 9.96  | 0.35 | 1.27 | 1.2473 |
| Elovl2        | 1416444_at   | 0.0174 | 0.29 | 3.89  | 3.60  | 0.35 | 1.18 | 1.2231 |
| Il6st         | 1437303_at   | 0.0174 | 0.55 | 5.79  | 5.25  | 0.35 | 1.25 | 1.4607 |
| Peg3          | 1433924_at   | 0.0175 | 0.81 | 6.00  | 5.19  | 0.35 | 1.42 | 1.7583 |
| Ccbl2         | 1455991_at   | 0.0176 | 0.49 | 7.93  | 7.44  | 0.35 | 1.23 | 1.4073 |
| Tram2         | 1439539_at   | 0.0177 | 0.27 | 10.85 | 10.58 | 0.35 | 1.27 | 1.2078 |
| Ctnnd1        | 1422450_at   | 0.0177 | 1.02 | 3.90  | 2.88  | 0.35 | 1.30 | 2.0326 |
| 2900035109Rik | 1457130_at   | 0.0178 | 0.39 | 5.24  | 4.85  | 0.35 | 1.97 | 1.3111 |
| Tube1         | 1431873_a_at | 0.0179 | 0.27 | 9.00  | 8.73  | 0.35 | 1.24 | 1.2054 |
| Fam199x       | 1439059_at   | 0.0179 | 0.45 | 9.50  | 9.05  | 0.35 | 1.47 | 1.3659 |
| Arl2bp        | 1429859_a_at | 0.0179 | 0.29 | 8.86  | 8.57  | 0.35 | 1.45 | 1.2230 |
| Ndrp2         | 1448154_at   | 0.0180 | 0.45 | 4.89  | 4.44  | 0.35 | 1.38 | 1.3643 |
| Kctd17        | 1435525_at   | 0.0181 | 0.35 | 6.25  | 5.90  | 0.35 | 1.45 | 1.2775 |
| Mib1          | 1433853_at   | 0.0181 | 0.32 | 6.45  | 6.13  | 0.35 | 1.25 | 1.2473 |
| Rnf144b       | 1439153_at   | 0.0182 | 0.66 | 6.90  | 6.24  | 0.35 | 1.26 | 1.5795 |
| Atxn2         | 1438143_s_at | 0.0182 | 0.28 | 11.15 | 10.87 | 0.35 | 1.49 | 1.2130 |
| Mcee          | 1438477_a_at | 0.0185 | 0.58 | 9.45  | 8.87  | 0.35 | 1.55 | 1.4984 |
| B230217O12Rik | 1440669_at   | 0.0186 | 0.43 | 5.77  | 5.34  | 0.35 | 1.15 | 1.3450 |
| Gpn1          | 1442114_at   | 0.0186 | 0.30 | 8.20  | 7.90  | 0.35 | 1.18 | 1.2315 |
| Clpb          | 1416541_at   | 0.0187 | 0.43 | 8.58  | 8.16  | 0.35 | 1.17 | 1.3441 |
| Rasal2        | 1436248_at   | 0.0189 | 0.61 | 6.89  | 6.27  | 0.35 | 1.16 | 1.5313 |
| 4831440E17Rik | 1458913_at   | 0.0190 | 0.46 | 5.37  | 4.91  | 0.35 | 1.15 | 1.3778 |
| Nid1          | 1416808_at   | 0.0193 | 0.61 | 8.20  | 7.59  | 0.35 | 1.18 | 1.5286 |
| Fam188a       | 1418963_at   | 0.0194 | 0.26 | 10.36 | 10.10 | 0.36 | 1.17 | 1.1983 |
| 3110057O12Rik | 1455475_at   | 0.0195 | 0.34 | 6.85  | 6.51  | 0.36 | 1.15 | 1.2647 |
| Lipa          | 1423140_at   | 0.0196 | 0.49 | 8.47  | 7.97  | 0.36 | 1.16 | 1.4067 |
| C79946        | 1458768_at   | 0.0196 | 0.94 | 8.15  | 7.21  | 0.36 | 1.14 | 1.9175 |
| Abi2          | 1436984_at   | 0.0196 | 0.31 | 11.05 | 10.74 | 0.36 | 1.25 | 1.2360 |
| Mmp11         | 1417234_at   | 0.0198 | 0.63 | 5.92  | 5.29  | 0.36 | 1.14 | 1.5480 |
| Aldh5a1       | 1453065_at   | 0.0199 | 0.54 | 5.46  | 4.92  | 0.36 | 1.15 | 1.4521 |

|               |              |        |      |       |       |      |      |        |
|---------------|--------------|--------|------|-------|-------|------|------|--------|
| Cds2          | 1438957_x_at | 0.0199 | 0.64 | 8.98  | 8.34  | 0.36 | 1.31 | 1.5613 |
| Ap3s2         | 1428044_at   | 0.0202 | 0.53 | 5.91  | 5.38  | 0.36 | 1.13 | 1.4429 |
| Nol11         | 1439166_at   | 0.0203 | 0.34 | 8.66  | 8.31  | 0.36 | 1.25 | 1.2690 |
| Vim           | 1456292_a_at | 0.0204 | 0.27 | 12.53 | 12.25 | 0.36 | 1.26 | 1.2075 |
| Clpx          | 1439342_at   | 0.0205 | 0.32 | 8.62  | 8.30  | 0.36 | 1.16 | 1.2493 |
| Dmxi2         | 1428749_at   | 0.0206 | 0.96 | 7.11  | 6.16  | 0.36 | 1.14 | 1.9429 |
| Rad54l        | 1453926_at   | 0.0207 | 0.79 | 8.29  | 7.50  | 0.36 | 1.79 | 1.7302 |
| Mtx3          | 1431071_at   | 0.0207 | 0.30 | 7.92  | 7.63  | 0.36 | 1.33 | 1.2281 |
| Trmt1l        | 1456996_at   | 0.0207 | 0.48 | 6.94  | 6.46  | 0.36 | 1.24 | 1.3903 |
| Prdm5         | 1442740_at   | 0.0207 | 0.80 | 4.54  | 3.74  | 0.36 | 1.15 | 1.7419 |
| Bcs1l         | 1451541_at   | 0.0210 | 0.28 | 9.58  | 9.30  | 0.37 | 1.16 | 1.2144 |
| B230214N19Rik | 1440722_at   | 0.0211 | 0.66 | 8.50  | 7.84  | 0.37 | 1.19 | 1.5842 |
| Bckdhb        | 1427153_at   | 0.0211 | 0.38 | 8.40  | 8.02  | 0.37 | 1.12 | 1.3018 |
| Arxes1        | 1428333_at   | 0.0211 | 0.95 | 5.16  | 4.20  | 0.37 | 1.22 | 1.9334 |
| Arxes2        | 1428333_at   | 0.0211 | 0.95 | 5.16  | 4.20  | 0.37 | 1.22 | 1.9334 |
| Bik           | 1449836_x_at | 0.0213 | 0.31 | 6.10  | 5.79  | 0.37 | 1.14 | 1.2372 |
| Cdkn1b        | 1434045_at   | 0.0213 | 0.34 | 10.08 | 9.75  | 0.37 | 1.44 | 1.2623 |
| P4htm         | 1459807_x_at | 0.0213 | 0.61 | 6.13  | 5.53  | 0.37 | 1.14 | 1.5243 |
| Mansc1        | 1423284_at   | 0.0214 | 0.73 | 5.86  | 5.13  | 0.37 | 1.22 | 1.6547 |
| Cenpw         | 1453053_at   | 0.0215 | 0.46 | 8.32  | 7.87  | 0.37 | 1.25 | 1.3720 |
| Zfp39         | 1441198_at   | 0.0215 | 0.40 | 9.34  | 8.94  | 0.37 | 1.43 | 1.3212 |
| Grtp1         | 1439150_x_at | 0.0216 | 0.30 | 8.62  | 8.32  | 0.37 | 1.14 | 1.2310 |
| Pigb          | 1420128_s_at | 0.0217 | 0.36 | 8.18  | 7.82  | 0.37 | 1.24 | 1.2853 |
| Pxmp2         | 1417841_at   | 0.0217 | 0.46 | 8.02  | 7.56  | 0.37 | 1.14 | 1.3720 |
| Tiam1         | 1418057_at   | 0.0218 | 0.41 | 7.10  | 6.70  | 0.37 | 1.11 | 1.3243 |
| Vps36         | 1451343_at   | 0.0219 | 0.28 | 11.05 | 10.77 | 0.37 | 1.32 | 1.2152 |
| Mlxipl        | 1419185_a_at | 0.0219 | 0.30 | 4.11  | 3.81  | 0.37 | 1.11 | 1.2298 |
| E230012J19Rik | 1458156_at   | 0.0220 | 0.47 | 9.57  | 9.11  | 0.37 | 1.12 | 1.3811 |
| Ube2e3        | 1448671_at   | 0.0220 | 0.56 | 7.11  | 6.55  | 0.37 | 1.12 | 1.4762 |
| Zfp668        | 1458563_at   | 0.0221 | 0.41 | 5.70  | 5.29  | 0.37 | 1.16 | 1.3259 |
| Lman1         | 1444037_at   | 0.0224 | 0.36 | 8.70  | 8.33  | 0.37 | 1.15 | 1.2862 |
| Obsl1         | 1457121_at   | 0.0224 | 0.26 | 6.30  | 6.04  | 0.37 | 1.31 | 1.2012 |
| Fam160a2      | 1429949_at   | 0.0224 | 0.49 | 9.28  | 8.79  | 0.37 | 1.26 | 1.4060 |
| Vkorc1        | 1452770_at   | 0.0226 | 0.42 | 7.23  | 6.81  | 0.37 | 1.60 | 1.3346 |
| Parp6         | 1440644_at   | 0.0226 | 0.62 | 5.05  | 4.43  | 0.37 | 1.26 | 1.5329 |
| Ap3m1         | 1416375_at   | 0.0229 | 0.35 | 9.98  | 9.63  | 0.37 | 1.23 | 1.2764 |
| Paip1         | 1425521_at   | 0.0230 | 0.32 | 6.35  | 6.04  | 0.37 | 1.21 | 1.2457 |
| Gm1995        | 1439958_at   | 0.0231 | 0.39 | 5.91  | 5.52  | 0.38 | 1.18 | 1.3112 |
| Gm7104        | 1439958_at   | 0.0231 | 0.39 | 5.91  | 5.52  | 0.38 | 1.18 | 1.3112 |
| Gkap1         | 1417594_at   | 0.0232 | 0.37 | 9.14  | 8.77  | 0.38 | 1.38 | 1.2926 |
| Zfp235        | 1449329_at   | 0.0232 | 0.53 | 9.74  | 9.21  | 0.38 | 1.13 | 1.4432 |
| Ppa1          | 1416939_at   | 0.0232 | 0.29 | 10.43 | 10.14 | 0.38 | 1.36 | 1.2215 |
| A730034C02    | 1421328_at   | 0.0233 | 0.30 | 3.31  | 3.01  | 0.38 | 1.17 | 1.2314 |
| Map2          | 1421328_at   | 0.0233 | 0.30 | 3.31  | 3.01  | 0.38 | 1.17 | 1.2314 |
| Pdzd4         | 1435457_at   | 0.0234 | 0.35 | 6.19  | 5.84  | 0.38 | 1.12 | 1.2770 |
| Zfp605        | 1425320_at   | 0.0234 | 0.35 | 6.51  | 6.16  | 0.38 | 1.12 | 1.2759 |
| 4931428A05Rik | 1432585_at   | 0.0235 | 0.33 | 3.50  | 3.17  | 0.38 | 1.20 | 1.2571 |
| 5830454E08Rik | 1442415_at   | 0.0237 | 0.33 | 7.37  | 7.04  | 0.38 | 1.35 | 1.2583 |
| Emp2          | 1425273_s_at | 0.0238 | 0.35 | 4.99  | 4.64  | 0.38 | 1.28 | 1.2755 |
| Emc9          | 1418474_at   | 0.0241 | 0.45 | 7.03  | 6.58  | 0.38 | 1.56 | 1.3661 |
| Itgb5         | 1417534_at   | 0.0243 | 0.67 | 5.91  | 5.24  | 0.38 | 1.08 | 1.5863 |
| Pnpla8        | 1457355_at   | 0.0244 | 0.31 | 8.32  | 8.01  | 0.38 | 1.18 | 1.2374 |
| Zdhhc17       | 1458363_at   | 0.0245 | 0.39 | 6.18  | 5.79  | 0.38 | 1.51 | 1.3125 |
| Lgalsl        | 1451313_a_at | 0.0247 | 0.37 | 9.68  | 9.31  | 0.38 | 1.81 | 1.2926 |
| Abca1         | 1421840_at   | 0.0247 | 0.41 | 9.63  | 9.22  | 0.38 | 1.42 | 1.3329 |
| 1500032P08Rik | 1447537_at   | 0.0247 | 0.36 | 9.62  | 9.26  | 0.38 | 1.16 | 1.2799 |
| Zfp113        | 1420675_at   | 0.0248 | 0.53 | 7.63  | 7.10  | 0.38 | 1.48 | 1.4469 |
| Elovl4        | 1451308_at   | 0.0249 | 0.45 | 5.53  | 5.08  | 0.38 | 1.12 | 1.3623 |
| Pdgfa         | 1449187_at   | 0.0250 | 0.71 | 7.85  | 7.15  | 0.38 | 1.09 | 1.6346 |
| A830010M20Rik | 1436117_at   | 0.0250 | 0.35 | 8.56  | 8.21  | 0.38 | 1.21 | 1.2769 |
| Mccc2         | 1432472_a_at | 0.0250 | 0.33 | 6.52  | 6.19  | 0.38 | 1.07 | 1.2550 |
| Mut           | 1448486_at   | 0.0251 | 0.26 | 9.95  | 9.69  | 0.38 | 1.09 | 1.2006 |
| Golim4        | 1459045_at   | 0.0252 | 0.92 | 6.83  | 5.91  | 0.38 | 1.08 | 1.8962 |
| Lrrn3         | 1434539_at   | 0.0252 | 0.71 | 6.93  | 6.22  | 0.38 | 1.09 | 1.6389 |
| 2810468N07Rik | 1452980_at   | 0.0254 | 0.54 | 6.34  | 5.79  | 0.39 | 1.16 | 1.4581 |
| Slc30a4       | 1418843_at   | 0.0255 | 0.94 | 10.00 | 9.06  | 0.39 | 1.24 | 1.9171 |
| Sh3rf1        | 1455149_at   | 0.0255 | 0.49 | 8.23  | 7.74  | 0.39 | 1.16 | 1.4058 |

|               |              |        |      |       |       |      |      |        |
|---------------|--------------|--------|------|-------|-------|------|------|--------|
| Pkp2          | 1449799_s_at | 0.0257 | 0.67 | 6.78  | 6.11  | 0.39 | 1.09 | 1.5939 |
| Rcor3         | 1444364_at   | 0.0257 | 0.64 | 7.45  | 6.82  | 0.39 | 1.71 | 1.5530 |
| Svip          | 1453049_at   | 0.0257 | 0.41 | 4.57  | 4.16  | 0.39 | 1.11 | 1.3271 |
| Desi1         | 1457181_at   | 0.0258 | 0.33 | 8.58  | 8.25  | 0.39 | 1.15 | 1.2574 |
| D5Ert579e     | 1439691_at   | 0.0258 | 0.45 | 7.13  | 6.68  | 0.39 | 1.25 | 1.3653 |
| Nts           | 1422860_at   | 0.0259 | 0.27 | 4.54  | 4.28  | 0.39 | 1.11 | 1.2048 |
| Eps8          | 1422823_at   | 0.0261 | 0.54 | 3.85  | 3.32  | 0.39 | 1.09 | 1.4513 |
| Hoxa5         | 1448926_at   | 0.0262 | 0.35 | 5.48  | 5.12  | 0.39 | 1.23 | 1.2782 |
| Cast          | 1426098_a_at | 0.0263 | 0.28 | 9.02  | 8.73  | 0.39 | 1.26 | 1.2163 |
| Al597468      | 1433897_at   | 0.0263 | 0.27 | 11.23 | 10.96 | 0.39 | 1.07 | 1.2039 |
| Gng3          | 1417428_at   | 0.0265 | 0.48 | 9.02  | 8.54  | 0.39 | 1.07 | 1.3922 |
| Mecp2         | 1438538_at   | 0.0265 | 0.26 | 10.27 | 10.01 | 0.39 | 1.07 | 1.1996 |
| Slc35f5       | 1452059_at   | 0.0265 | 0.63 | 8.46  | 7.83  | 0.39 | 1.29 | 1.5520 |
| Phf13         | 1455175_at   | 0.0265 | 0.28 | 9.92  | 9.64  | 0.39 | 1.06 | 1.2151 |
| Il15          | 1418219_at   | 0.0266 | 0.63 | 5.40  | 4.76  | 0.39 | 1.11 | 1.5516 |
| Mtdh          | 1421110_at   | 0.0268 | 0.29 | 4.57  | 4.28  | 0.39 | 1.20 | 1.2258 |
| Fndc3a        | 1426903_at   | 0.0268 | 0.29 | 9.73  | 9.44  | 0.39 | 1.06 | 1.2254 |
| 6720475M21Rik | 1433246_at   | 0.0268 | 0.43 | 5.67  | 5.24  | 0.39 | 1.15 | 1.3487 |
| Zfp2          | 1449913_at   | 0.0269 | 0.49 | 5.14  | 4.65  | 0.39 | 1.11 | 1.4005 |
| Ranbp17       | 1450094_at   | 0.0269 | 0.45 | 5.87  | 5.41  | 0.39 | 1.16 | 1.3697 |
| Anxa10        | 1449426_a_at | 0.0270 | 0.79 | 6.39  | 5.59  | 0.39 | 1.22 | 1.7346 |
| Kctd7         | 1440168_x_at | 0.0270 | 0.39 | 10.28 | 9.89  | 0.39 | 1.14 | 1.3133 |
| Bdh1          | 1452257_at   | 0.0270 | 0.46 | 9.21  | 8.75  | 0.39 | 1.08 | 1.3755 |
| Trmt10c       | 1442716_at   | 0.0270 | 0.38 | 6.02  | 5.64  | 0.39 | 1.30 | 1.3036 |
| Fbxl20        | 1452826_s_at | 0.0271 | 0.29 | 7.90  | 7.62  | 0.39 | 1.13 | 1.2187 |
| Chchd6        | 1438659_x_at | 0.0271 | 0.34 | 8.97  | 8.64  | 0.39 | 1.08 | 1.2650 |
| Satb1         | 1439449_at   | 0.0271 | 0.41 | 8.34  | 7.93  | 0.39 | 1.12 | 1.3327 |
| Kif3c         | 1434947_at   | 0.0273 | 0.34 | 7.82  | 7.48  | 0.39 | 1.07 | 1.2666 |
| Zfp93         | 1418955_at   | 0.0273 | 0.40 | 5.34  | 4.93  | 0.39 | 1.05 | 1.3224 |
| Abca5         | 1434474_at   | 0.0275 | 0.37 | 6.00  | 5.63  | 0.39 | 1.14 | 1.2904 |
| Uba5          | 1451973_at   | 0.0277 | 0.28 | 9.64  | 9.36  | 0.39 | 1.37 | 1.2119 |
| Sox5          | 1423500_a_at | 0.0277 | 0.37 | 7.54  | 7.17  | 0.39 | 1.12 | 1.2909 |
| Kdsr          | 1440331_at   | 0.0278 | 0.45 | 7.38  | 6.93  | 0.39 | 1.05 | 1.3705 |
| Dnajc28       | 1420543_at   | 0.0278 | 0.54 | 7.02  | 6.48  | 0.39 | 1.15 | 1.4541 |
| Ints6         | 1436089_at   | 0.0278 | 0.29 | 10.29 | 10.00 | 0.39 | 1.14 | 1.2267 |
| C630016I17Rik | 1446298_at   | 0.0279 | 0.30 | 7.24  | 6.93  | 0.39 | 1.27 | 1.2334 |
| Tnfaip1       | 1417865_at   | 0.0283 | 0.31 | 10.59 | 10.28 | 0.39 | 1.14 | 1.2406 |
| Ctbs          | 1427658_at   | 0.0283 | 0.30 | 6.53  | 6.23  | 0.39 | 1.05 | 1.2340 |
| Ddx60         | 1451777_at   | 0.0284 | 0.48 | 3.71  | 3.23  | 0.39 | 1.06 | 1.3951 |
| Clip3         | 1430543_at   | 0.0289 | 0.50 | 6.37  | 5.86  | 0.40 | 1.21 | 1.4190 |
| Hcfc2         | 1438328_at   | 0.0290 | 0.37 | 10.15 | 9.77  | 0.40 | 1.51 | 1.2953 |
| Serbp1        | 1418565_at   | 0.0291 | 0.28 | 10.81 | 10.53 | 0.40 | 1.40 | 1.2116 |
| Fabp5         | 1416022_at   | 0.0293 | 0.32 | 9.03  | 8.71  | 0.40 | 1.21 | 1.2463 |
| C130057M05Rik | 1457334_at   | 0.0293 | 0.50 | 7.41  | 6.91  | 0.40 | 1.06 | 1.4108 |
| Als2cr12      | 1439758_at   | 0.0295 | 0.40 | 5.12  | 4.71  | 0.40 | 1.03 | 1.3204 |
| Gm17748       | 1431505_at   | 0.0295 | 0.53 | 7.07  | 6.54  | 0.40 | 1.25 | 1.4460 |
| Ppih          | 1431505_at   | 0.0295 | 0.53 | 7.07  | 6.54  | 0.40 | 1.25 | 1.4460 |
| Aph1b         | 1456500_at   | 0.0296 | 0.67 | 4.56  | 3.89  | 0.40 | 1.16 | 1.5893 |
| Tmem181a      | 1452848_at   | 0.0296 | 0.33 | 11.00 | 10.67 | 0.40 | 1.06 | 1.2558 |
| Tmem181b-ps   | 1452848_at   | 0.0296 | 0.33 | 11.00 | 10.67 | 0.40 | 1.06 | 1.2558 |
| Tmem181c-ps   | 1452848_at   | 0.0296 | 0.33 | 11.00 | 10.67 | 0.40 | 1.06 | 1.2558 |
| Cenpv         | 1428706_at   | 0.0296 | 0.35 | 10.61 | 10.27 | 0.40 | 1.15 | 1.2723 |
| Prss35        | 1434195_at   | 0.0297 | 0.33 | 3.95  | 3.62  | 0.40 | 1.05 | 1.2529 |
| Ppp2r2a       | 1429715_at   | 0.0298 | 0.26 | 11.07 | 10.81 | 0.40 | 1.16 | 1.1978 |
| 2700089E24Rik | 1460464_at   | 0.0299 | 0.34 | 9.32  | 8.98  | 0.40 | 1.03 | 1.2647 |
| Spire1        | 1446117_at   | 0.0299 | 0.27 | 6.51  | 6.24  | 0.40 | 1.24 | 1.2099 |
| Zfp949        | 1456518_at   | 0.0301 | 0.35 | 7.58  | 7.24  | 0.40 | 1.31 | 1.2727 |
| Tspan3        | 1416009_at   | 0.0303 | 0.45 | 7.83  | 7.38  | 0.40 | 1.37 | 1.3649 |
| Ap2b1         | 1427077_a_at | 0.0303 | 0.26 | 9.30  | 9.04  | 0.40 | 1.35 | 1.2000 |
| Zfp788        | 1441434_at   | 0.0305 | 0.39 | 8.42  | 8.03  | 0.40 | 1.26 | 1.3059 |
| Ccdc58        | 1440260_at   | 0.0307 | 0.34 | 7.42  | 7.07  | 0.40 | 1.03 | 1.2695 |
| Acadvl        | 1424184_at   | 0.0307 | 0.27 | 9.73  | 9.47  | 0.40 | 1.06 | 1.2031 |
| Atg4c         | 1434014_at   | 0.0307 | 0.41 | 6.51  | 6.10  | 0.40 | 1.23 | 1.3261 |
| Amigo2        | 1447769_x_at | 0.0308 | 0.35 | 4.84  | 4.48  | 0.40 | 1.10 | 1.2785 |
| Gm5595        | 1460017_at   | 0.0310 | 0.42 | 6.46  | 6.04  | 0.40 | 1.18 | 1.3370 |
| Nav3          | 1456144_at   | 0.0311 | 0.67 | 4.96  | 4.30  | 0.40 | 1.03 | 1.5868 |
| Gtbp5         | 1430272_at   | 0.0313 | 0.28 | 7.35  | 7.06  | 0.40 | 1.30 | 1.2177 |

|               |              |        |      |       |       |      |      |        |
|---------------|--------------|--------|------|-------|-------|------|------|--------|
| Prkar2b       | 1438664_at   | 0.0314 | 0.72 | 6.36  | 5.65  | 0.40 | 1.24 | 1.6423 |
| Zfp128        | 1439875_at   | 0.0315 | 0.34 | 7.58  | 7.24  | 0.40 | 1.01 | 1.2661 |
| Rnf11         | 1426404_a_at | 0.0315 | 0.27 | 9.37  | 9.10  | 0.40 | 1.26 | 1.2050 |
| Bcas3         | 1428454_at   | 0.0316 | 0.48 | 8.84  | 8.37  | 0.40 | 1.35 | 1.3903 |
| Rrbp1         | 1436660_at   | 0.0316 | 0.36 | 7.19  | 6.83  | 0.40 | 1.11 | 1.2854 |
| Sirt5         | 1428915_at   | 0.0317 | 0.52 | 7.77  | 7.25  | 0.40 | 1.23 | 1.4347 |
| Trim32        | 1427476_a_at | 0.0319 | 0.28 | 9.64  | 9.36  | 0.40 | 1.31 | 1.2172 |
| Mxra8         | 1452330_a_at | 0.0321 | 0.47 | 6.65  | 6.18  | 0.41 | 1.24 | 1.3884 |
| Slc35b2       | 1429007_at   | 0.0322 | 0.37 | 9.52  | 9.14  | 0.41 | 1.15 | 1.2951 |
| Tfpi          | 1451791_at   | 0.0325 | 0.31 | 5.48  | 5.17  | 0.41 | 1.05 | 1.2424 |
| Ptger4        | 1424208_at   | 0.0325 | 0.36 | 10.72 | 10.36 | 0.41 | 1.24 | 1.2798 |
| Eid2          | 1454931_at   | 0.0325 | 0.57 | 6.60  | 6.03  | 0.41 | 1.03 | 1.4896 |
| Anxa5         | 1425567_a_at | 0.0327 | 0.52 | 7.59  | 7.07  | 0.41 | 1.20 | 1.4355 |
| Nudcd1        | 1429655_at   | 0.0327 | 0.26 | 8.76  | 8.49  | 0.41 | 1.02 | 1.2007 |
| Tmem242       | 1424045_at   | 0.0328 | 0.29 | 7.45  | 7.16  | 0.41 | 1.34 | 1.2213 |
| 3830406C13Rik | 1436388_a_at | 0.0329 | 0.28 | 10.45 | 10.16 | 0.41 | 1.07 | 1.2177 |
| Zfp358        | 1456151_at   | 0.0330 | 0.40 | 7.51  | 7.11  | 0.41 | 1.17 | 1.3240 |
| Sema4f        | 1439768_x_at | 0.0333 | 0.32 | 5.53  | 5.21  | 0.41 | 1.00 | 1.2466 |
| Cdcp1         | 1427095_at   | 0.0337 | 0.35 | 4.27  | 3.92  | 0.41 | 1.02 | 1.2738 |
| Trim13        | 1417888_at   | 0.0338 | 0.63 | 5.89  | 5.26  | 0.41 | 1.43 | 1.5464 |
| Ocr1          | 1438284_at   | 0.0339 | 0.55 | 6.17  | 5.62  | 0.42 | 1.00 | 1.4606 |
| Plod2         | 1416686_at   | 0.0341 | 0.54 | 4.73  | 4.19  | 0.42 | 1.23 | 1.4533 |
| Ccl22         | 1417925_at   | 0.0341 | 0.54 | 6.05  | 5.51  | 0.42 | 1.09 | 1.4547 |
| 6720462K09Rik | 1456896_at   | 0.0342 | 0.57 | 5.86  | 5.29  | 0.42 | 1.01 | 1.4853 |
| Zfp937        | 1428033_at   | 0.0347 | 0.60 | 5.66  | 5.06  | 0.42 | 1.13 | 1.5176 |
| Ero1l         | 1419030_at   | 0.0348 | 0.40 | 8.22  | 7.82  | 0.42 | 0.99 | 1.3152 |
| Sept4         | 1455422_x_at | 0.0348 | 0.55 | 5.08  | 4.53  | 0.42 | 1.08 | 1.4676 |
| Nostrin       | 1441075_at   | 0.0348 | 0.34 | 6.54  | 6.21  | 0.42 | 1.03 | 1.2624 |
| Amigo1        | 1447811_s_at | 0.0349 | 0.59 | 8.47  | 7.88  | 0.42 | 1.15 | 1.5041 |
| 5830443J22Rik | 1429902_at   | 0.0350 | 0.32 | 9.55  | 9.23  | 0.42 | 0.99 | 1.2492 |
| Gsto1         | 1416531_at   | 0.0350 | 0.46 | 8.25  | 7.79  | 0.42 | 1.06 | 1.3738 |
| Cadm1         | 1417378_at   | 0.0350 | 0.46 | 6.96  | 6.50  | 0.42 | 1.04 | 1.3713 |
| 3110007F17Rik | 1439279_at   | 0.0351 | 0.75 | 4.57  | 3.82  | 0.42 | 0.99 | 1.6859 |
| Il18          | 1417932_at   | 0.0355 | 0.76 | 4.64  | 3.89  | 0.42 | 1.18 | 1.6884 |
| BC024137      | 1427513_at   | 0.0356 | 0.37 | 7.32  | 6.95  | 0.42 | 1.41 | 1.2935 |
| Zfp449        | 1439945_at   | 0.0356 | 0.63 | 5.33  | 4.70  | 0.42 | 1.14 | 1.5484 |
| Slfn9         | 1458803_at   | 0.0356 | 0.28 | 5.47  | 5.19  | 0.42 | 0.98 | 1.2148 |
| Cercam        | 1435345_at   | 0.0357 | 0.46 | 7.15  | 6.69  | 0.42 | 1.01 | 1.3731 |
| Gca           | 1424698_s_at | 0.0359 | 0.40 | 7.86  | 7.46  | 0.42 | 1.31 | 1.3198 |
| Epas1         | 1435436_at   | 0.0360 | 0.64 | 6.54  | 5.90  | 0.42 | 1.17 | 1.5577 |
| Slc2a1        | 1426600_at   | 0.0360 | 0.30 | 11.62 | 11.33 | 0.42 | 0.98 | 1.2292 |
| Tle3          | 1458512_at   | 0.0360 | 0.31 | 6.54  | 6.23  | 0.42 | 1.19 | 1.2358 |
| Zbtb46        | 1429168_at   | 0.0360 | 0.37 | 4.77  | 4.41  | 0.42 | 1.07 | 1.2880 |
| Ccdc171       | 1430298_at   | 0.0361 | 0.40 | 9.29  | 8.89  | 0.42 | 1.00 | 1.3211 |
| Smpd2         | 1416999_at   | 0.0365 | 0.26 | 8.17  | 7.91  | 0.42 | 0.98 | 1.1992 |
| LOC100862620  | 1444092_at   | 0.0367 | 0.60 | 6.06  | 5.46  | 0.42 | 1.51 | 1.5153 |
| 2410007B07Rik | 1454215_at   | 0.0367 | 0.29 | 6.34  | 6.05  | 0.42 | 1.01 | 1.2261 |
| Clock         | 1418660_at   | 0.0367 | 0.37 | 8.35  | 7.98  | 0.42 | 1.09 | 1.2896 |
| Pawr          | 1426910_at   | 0.0369 | 0.54 | 10.89 | 10.35 | 0.42 | 1.18 | 1.4495 |
| Klhl22        | 1426481_at   | 0.0373 | 0.33 | 6.53  | 6.20  | 0.43 | 1.05 | 1.2588 |
| Zbtb10        | 1436068_at   | 0.0373 | 0.64 | 7.09  | 6.45  | 0.43 | 1.03 | 1.5577 |
| Slc35a3       | 1424579_at   | 0.0374 | 0.34 | 9.92  | 9.57  | 0.43 | 1.13 | 1.2693 |
| Crkl          | 1425604_at   | 0.0375 | 0.32 | 6.37  | 6.05  | 0.43 | 0.98 | 1.2463 |
| AA408954      | 1420156_at   | 0.0376 | 0.43 | 4.96  | 4.53  | 0.43 | 1.01 | 1.3511 |
| Scal          | 1445081_at   | 0.0377 | 0.33 | 8.65  | 8.32  | 0.43 | 1.06 | 1.2535 |
| Letmd1        | 1441021_at   | 0.0381 | 0.57 | 7.90  | 7.33  | 0.43 | 1.34 | 1.4835 |
| D930015E06Rik | 1446219_at   | 0.0383 | 0.32 | 8.59  | 8.27  | 0.43 | 1.11 | 1.2475 |
| Adhfe1        | 1424393_s_at | 0.0383 | 0.31 | 9.97  | 9.66  | 0.43 | 0.97 | 1.2419 |
| D030029J20Rik | 1437885_at   | 0.0392 | 0.34 | 4.85  | 4.51  | 0.43 | 0.96 | 1.2686 |
| Zfp629        | 1436537_at   | 0.0394 | 0.33 | 6.51  | 6.18  | 0.44 | 1.16 | 1.2596 |
| 5830426K05Rik | 1432807_at   | 0.0395 | 0.48 | 6.25  | 5.77  | 0.44 | 0.96 | 1.3919 |
| Atf7ip2       | 1427603_at   | 0.0396 | 0.44 | 5.60  | 5.16  | 0.44 | 0.96 | 1.3554 |
| Zfp623        | 1426625_at   | 0.0396 | 0.57 | 7.25  | 6.68  | 0.44 | 0.98 | 1.4842 |
| Zfp945        | 1437127_at   | 0.0399 | 0.49 | 8.12  | 7.62  | 0.44 | 0.96 | 1.4076 |
| 6030458C11Rik | 1428013_at   | 0.0400 | 0.29 | 7.78  | 7.49  | 0.44 | 0.96 | 1.2267 |
| Abl1          | 1444134_at   | 0.0401 | 0.28 | 6.23  | 5.95  | 0.44 | 0.95 | 1.2177 |
| 1110018F16Rik | 1429468_at   | 0.0402 | 0.39 | 7.54  | 7.15  | 0.44 | 1.03 | 1.3109 |

|               |              |        |      |       |       |      |      |        |
|---------------|--------------|--------|------|-------|-------|------|------|--------|
| Dnajb14       | 1429468_at   | 0.0402 | 0.39 | 7.54  | 7.15  | 0.44 | 1.03 | 1.3109 |
| Ndufb4        | 1432427_at   | 0.0402 | 0.41 | 5.09  | 4.68  | 0.44 | 0.97 | 1.3260 |
| Tmtc3         | 1436826_at   | 0.0402 | 0.41 | 7.54  | 7.13  | 0.44 | 1.03 | 1.3315 |
| Eogt          | 1454678_s_at | 0.0402 | 0.34 | 10.01 | 9.67  | 0.44 | 1.00 | 1.2620 |
| Gab2          | 1419829_a_at | 0.0406 | 0.54 | 4.66  | 4.12  | 0.44 | 1.02 | 1.4494 |
| 9130009M17Rik | 1432680_at   | 0.0407 | 0.43 | 7.42  | 6.99  | 0.44 | 1.01 | 1.3496 |
| Tatdn1        | 1438513_at   | 0.0407 | 0.42 | 8.35  | 7.93  | 0.44 | 0.99 | 1.3339 |
| Chst15        | 1426514_at   | 0.0408 | 0.30 | 8.63  | 8.33  | 0.44 | 1.09 | 1.2279 |
| Slc36a4       | 1455249_at   | 0.0409 | 0.27 | 11.18 | 10.92 | 0.44 | 0.96 | 1.2043 |
| Aco1          | 1423644_at   | 0.0410 | 0.35 | 8.90  | 8.55  | 0.44 | 1.04 | 1.2745 |
| Rbm4b         | 1430032_at   | 0.0413 | 0.42 | 8.57  | 8.15  | 0.44 | 1.22 | 1.3336 |
| Fzd7          | 1450044_at   | 0.0413 | 0.30 | 3.97  | 3.67  | 0.44 | 0.94 | 1.2335 |
| Scrn3         | 1436573_at   | 0.0414 | 0.32 | 10.26 | 9.94  | 0.44 | 0.95 | 1.2474 |
| Zfp316        | 1444528_at   | 0.0414 | 0.36 | 5.50  | 5.14  | 0.44 | 1.19 | 1.2807 |
| Slc52a2       | 1437315_at   | 0.0414 | 0.65 | 9.00  | 8.35  | 0.44 | 1.33 | 1.5674 |
| Zmym4         | 1438460_at   | 0.0417 | 0.29 | 9.53  | 9.24  | 0.44 | 0.94 | 1.2222 |
| Camsap1       | 1455356_at   | 0.0418 | 0.31 | 8.59  | 8.28  | 0.44 | 0.94 | 1.2393 |
| Cul9          | 1427620_at   | 0.0421 | 0.37 | 6.73  | 6.36  | 0.44 | 0.94 | 1.2941 |
| 2810002D19Rik | 1452312_at   | 0.0421 | 0.28 | 9.26  | 8.98  | 0.44 | 1.50 | 1.2155 |
| 2810025M15Rik | 1428452_at   | 0.0422 | 0.63 | 8.90  | 8.27  | 0.44 | 0.94 | 1.5509 |
| Pvr           | 1423904_a_at | 0.0423 | 0.45 | 5.53  | 5.08  | 0.44 | 1.02 | 1.3633 |
| Slc25a36      | 1438520_at   | 0.0423 | 0.41 | 7.99  | 7.58  | 0.44 | 1.36 | 1.3302 |
| Dynlt3        | 1449928_at   | 0.0424 | 0.28 | 9.58  | 9.31  | 0.44 | 0.95 | 1.2130 |
| Zfp946        | 1429690_at   | 0.0425 | 0.34 | 8.14  | 7.80  | 0.44 | 1.16 | 1.2657 |
| Gramd1c       | 1434725_at   | 0.0425 | 0.50 | 6.24  | 5.74  | 0.44 | 0.94 | 1.4162 |
| 9230108115Rik | 1438299_at   | 0.0426 | 0.40 | 8.08  | 7.68  | 0.44 | 0.94 | 1.3214 |
| C80068        | 1438755_at   | 0.0428 | 0.28 | 6.89  | 6.62  | 0.44 | 1.05 | 1.2109 |
| Fam210b       | 1424695_at   | 0.0435 | 0.33 | 6.53  | 6.21  | 0.44 | 0.93 | 1.2534 |
| Cyth3         | 1418758_a_at | 0.0435 | 0.43 | 7.04  | 6.62  | 0.44 | 1.11 | 1.3441 |
| Stx12         | 1448936_at   | 0.0435 | 0.26 | 10.50 | 10.24 | 0.44 | 1.46 | 1.1979 |
| Mfhas1        | 1429005_at   | 0.0436 | 0.58 | 8.93  | 8.36  | 0.44 | 1.15 | 1.4925 |
| Cd55          | 1460242_at   | 0.0438 | 0.59 | 8.66  | 8.07  | 0.45 | 0.94 | 1.5058 |
| Nefn          | 1424847_at   | 0.0441 | 0.72 | 8.06  | 7.35  | 0.45 | 1.17 | 1.6428 |
| Tbc1d24       | 1448028_at   | 0.0451 | 0.62 | 7.74  | 7.11  | 0.45 | 1.02 | 1.5403 |
| Agbl3         | 1431210_at   | 0.0451 | 0.28 | 3.70  | 3.42  | 0.45 | 0.96 | 1.2149 |
| Ide           | 1453988_a_at | 0.0451 | 0.39 | 7.42  | 7.03  | 0.45 | 0.93 | 1.3082 |
| Rbbp9         | 1416174_at   | 0.0451 | 0.43 | 3.95  | 3.52  | 0.45 | 0.96 | 1.3506 |
| Dcaf6         | 1453312_at   | 0.0452 | 0.38 | 9.46  | 9.08  | 0.45 | 1.16 | 1.3027 |
| Mtmr10        | 1452288_at   | 0.0455 | 0.27 | 8.05  | 7.78  | 0.45 | 1.20 | 1.2041 |
| C78339        | 1433475_a_at | 0.0455 | 0.40 | 10.18 | 9.78  | 0.45 | 1.20 | 1.3201 |
| Nfe2l3        | 1453614_a_at | 0.0456 | 0.37 | 4.91  | 4.55  | 0.45 | 1.06 | 1.2889 |
| Rimk1a        | 1455378_at   | 0.0457 | 0.52 | 6.61  | 6.09  | 0.45 | 1.18 | 1.4347 |
| Zfp599        | 1443688_at   | 0.0457 | 0.43 | 8.15  | 7.72  | 0.45 | 0.97 | 1.3508 |
| 9430020K01Rik | 1428535_at   | 0.0460 | 0.30 | 3.85  | 3.56  | 0.45 | 1.05 | 1.2303 |
| Gatsl2        | 1437252_at   | 0.0460 | 0.35 | 6.60  | 6.25  | 0.45 | 0.98 | 1.2784 |
| Hbb-bh1       | 1450736_a_at | 0.0461 | 0.47 | 10.29 | 9.83  | 0.45 | 0.97 | 1.3809 |
| Acadsb        | 1455446_x_at | 0.0462 | 0.34 | 7.71  | 7.36  | 0.45 | 0.95 | 1.2701 |
| Timp2         | 1437081_at   | 0.0463 | 0.31 | 4.53  | 4.21  | 0.45 | 0.92 | 1.2419 |
| L1cam         | 1450435_at   | 0.0466 | 0.67 | 7.82  | 7.15  | 0.45 | 0.95 | 1.5941 |
| Smurf2        | 1429045_at   | 0.0466 | 0.29 | 10.27 | 9.99  | 0.45 | 0.91 | 1.2191 |
| Dancr         | 1455878_at   | 0.0466 | 0.47 | 9.60  | 9.13  | 0.45 | 0.93 | 1.3815 |
| Nudt7         | 1430896_s_at | 0.0468 | 0.41 | 8.62  | 8.21  | 0.45 | 1.31 | 1.3273 |
| Lrpap1        | 1436609_a_at | 0.0470 | 0.30 | 10.26 | 9.96  | 0.45 | 0.95 | 1.2294 |
| Appl2         | 1426743_at   | 0.0470 | 0.58 | 8.48  | 7.89  | 0.45 | 0.94 | 1.4995 |
| Laptm4b       | 1436915_x_at | 0.0471 | 0.48 | 4.90  | 4.43  | 0.45 | 0.91 | 1.3911 |
| Zfp286        | 1442247_at   | 0.0473 | 0.27 | 5.06  | 4.79  | 0.45 | 0.97 | 1.2034 |
| Setd1b        | 1437353_at   | 0.0473 | 0.29 | 9.06  | 8.78  | 0.45 | 1.04 | 1.2209 |
| Repin1        | 1434043_a_at | 0.0474 | 0.38 | 10.89 | 10.52 | 0.45 | 0.92 | 1.2976 |
| Acss2         | 1422478_a_at | 0.0478 | 0.50 | 8.98  | 8.48  | 0.45 | 0.97 | 1.4150 |
| Tmod3         | 1439626_at   | 0.0478 | 0.42 | 7.08  | 6.66  | 0.45 | 0.92 | 1.3375 |
| Nagk          | 1438800_at   | 0.0479 | 0.43 | 7.78  | 7.36  | 0.45 | 0.92 | 1.3442 |
| Ddr1          | 1456226_x_at | 0.0479 | 0.28 | 3.19  | 2.91  | 0.45 | 0.92 | 1.2163 |
| 2200002D01Rik | 1428671_at   | 0.0480 | 0.35 | 7.83  | 7.49  | 0.45 | 0.92 | 1.2708 |
| Ehbp1         | 1424586_at   | 0.0481 | 0.69 | 7.08  | 6.39  | 0.45 | 1.19 | 1.6127 |
| Zfp418        | 1424974_at   | 0.0482 | 0.64 | 6.97  | 6.33  | 0.45 | 0.97 | 1.5594 |
| Etv5          | 1428142_at   | 0.0482 | 0.54 | 8.62  | 8.08  | 0.45 | 0.94 | 1.4509 |
| Car3          | 1449434_at   | 0.0485 | 0.73 | 4.99  | 4.25  | 0.45 | 0.91 | 1.6642 |

|         |              |        |      |      |      |      |      |        |
|---------|--------------|--------|------|------|------|------|------|--------|
| Ppap2b  | 1429514_at   | 0.0486 | 0.43 | 5.07 | 4.65 | 0.45 | 0.92 | 1.3444 |
| Vav3    | 1448600_s_at | 0.0488 | 0.66 | 6.61 | 5.95 | 0.45 | 1.01 | 1.5829 |
| Mprip   | 1456763_at   | 0.0489 | 0.32 | 8.91 | 8.58 | 0.45 | 1.06 | 1.2514 |
| Zfp760  | 1440226_at   | 0.0490 | 0.41 | 8.44 | 8.03 | 0.46 | 1.10 | 1.3290 |
| Tbc1d4  | 1435292_at   | 0.0493 | 0.69 | 6.63 | 5.95 | 0.46 | 0.93 | 1.6088 |
| Vwa8    | 1455376_at   | 0.0495 | 0.48 | 7.78 | 7.30 | 0.46 | 0.92 | 1.3981 |
| Creb3l2 | 1437396_at   | 0.0496 | 0.27 | 4.78 | 4.51 | 0.46 | 0.90 | 1.2073 |
| ErbB3   | 1434606_at   | 0.0499 | 0.35 | 9.22 | 8.87 | 0.46 | 0.90 | 1.2751 |
| Nacc2   | 1429582_at   | 0.0500 | 0.26 | 6.60 | 6.34 | 0.46 | 1.03 | 1.1985 |

\* Genes that are upregulated or downregulated in *Crebbp<sup>fl/fl</sup>* GC B cells are ordered by decreasing p value (most significant first).

**Supplementary Table 3.** List of CREBBP "core target" genes (bound by CREBBP in human GC B cells and downregulated in *Cγ1-Cre Crebbp<sup>fl/fl</sup>* GC B cells)

| Genomic Location (hg19)  | Best P-value (ChIPseeqer) | Assigned Gene Symbol | Distance to Assigned TSS (in bp) | H3K27 Ac | H3K4 me1 | H3K4 me3 | Super Enhancer in GC | Location relative to Assigned Gene (prom=-2/+1kb) | Class*          | Mouse Gene Symbol |
|--------------------------|---------------------------|----------------------|----------------------------------|----------|----------|----------|----------------------|---------------------------------------------------|-----------------|-------------------|
| chrX:118819341-118820499 | -52.57                    | SEPT6                | 7413                             | +        | +        | +        | Yes                  | intronic                                          | Other           | Sept6             |
| chrX:118816241-118816556 | -47.27                    | SEPT6                | 10935                            | +        | +        | -        | Yes                  | intronic                                          | Active enhancer | Sept6             |
| chrX:118812577-118812960 | -39.17                    | SEPT6                | 14565                            | +        | +        | -        | Yes                  | intronic                                          | Active enhancer | Sept6             |
| chrX:118830562-118830778 | -31.71                    | SEPT6                | -3337                            | +        | +        | -        | Yes                  | intergenic                                        | Active enhancer | Sept6             |
| chrX:118822080-118822199 | -23.15                    | SEPT6                | 5194                             | +        | +        | -        | Yes                  | intronic                                          | Active enhancer | Sept6             |
| chr17:75436594-75438304  | -1000.00                  | SEPT9                | -9164                            | +        | +        | -        | Yes                  | intergenic                                        | Active enhancer | Sept9             |
| chr17:75400986-75401336  | -98.09                    | SEPT9                | 10                               | +        | +        | +        | No                   | promoter,exonic                                   | Other           | Sept9             |
| chr17:75461317-75462088  | -81.12                    | SEPT9                | -9623                            | +        | +        | -        | Yes                  | intergenic                                        | Active enhancer | Sept9             |
| chr17:75468521-75469281  | -72.48                    | SEPT9                | -2424                            | +        | +        | -        | Yes                  | intergenic                                        | Active enhancer | Sept9             |
| chr17:75440960-75442558  | -63.89                    | SEPT9                | -4854                            | +        | +        | -        | Yes                  | intergenic                                        | Active enhancer | Sept9             |
| chr17:75321170-75321579  | -51.63                    | SEPT9                | 5777                             | +        | +        | -        | No                   | intronic                                          | Active enhancer | Sept9             |
| chr17:75319783-75320260  | -48.89                    | SEPT9                | 4424                             | +        | +        | -        | No                   | intronic                                          | Active enhancer | Sept9             |
| chr17:75458180-75458508  | -48.82                    | SEPT9                | 8269                             | +        | +        | -        | Yes                  | intronic                                          | Active enhancer | Sept9             |
| chr17:75328399-75328859  | -41.98                    | SEPT9                | 13032                            | +        | +        | -        | No                   | intronic                                          | Active enhancer | Sept9             |
| chr17:75449938-75450183  | -32.58                    | SEPT9                | -15                              | +        | +        | +        | Yes                  | promoter                                          | Other           | Sept9             |
| chr17:75434964-75435133  | -18.45                    | SEPT9                | -11565                           | +        | +        | -        | Yes                  | intergenic                                        | Active enhancer | Sept9             |
| chr17:75456847-75456856  | -13.93                    | SEPT9                | 6776                             | +        | +        | -        | Yes                  | intronic                                          | Active enhancer | Sept9             |
| chr3:127454836-127455462 | -42.83                    | ABTB1                | 63368                            | +        | +        | +        | No                   | intergenic                                        | Other           | Abtb1             |
| chr17:7240225-7240555    | -37.58                    | ACAP1                | 542                              | +        | +        | +        | No                   | promoter,intronic                                 | Other           | Acap1             |
| chr11:67416386-67417100  | -1000.00                  | ACY3                 | 1387                             | +        | +        | -        | No                   | intronic                                          | Active enhancer | Acy3              |
| chr11:67414066-67414708  | -60.67                    | ACY3                 | 3743                             | +        | +        | -        | No                   | exonic                                            | Active enhancer | Acy3              |
| chr11:67415579-67416037  | -30.74                    | ACY3                 | 2322                             | +        | +        | -        | No                   | intronic                                          | Active enhancer | Acy3              |
| chr11:67417922-67418225  | -17.70                    | ACY3                 | 57                               | +        | +        | +        | No                   | promoter,exonic                                   | Other           | Acy3              |
| chr19:1904326-1904661    | -50.79                    | ADAT3                | -878                             | +        | +        | -        | No                   | promoter                                          | Other           | Adat3             |
| chr1:227127399-227127719 | -17.20                    | ADCK3                | -379                             | +        | -        | +        | No                   | promoter                                          | Active promoter | Adck3             |
| chr7:128864314-128864722 | -49.35                    | AHCYL2               | -337                             | +        | -        | +        | No                   | promoter                                          | Active promoter | Ahcyl2            |
| chr6:106967745-106968215 | -39.34                    | AIM1                 | 8250                             | +        | +        | +        | Yes                  | exonic                                            | Other           | Aim1              |
| chr6:106972948-106973169 | -38.04                    | AIM1                 | 13328                            | +        | +        | +        | Yes                  | intronic                                          | Other           | Aim1              |
| chr6:106994863-106995078 | -25.32                    | AIM1                 | 35240                            | +        | +        | -        | No                   | intronic                                          | Active enhancer | Aim1              |
| chr6:106961101-106961333 | -22.37                    | AIM1                 | 1487                             | +        | +        | +        | Yes                  | intronic                                          | Other           | Aim1              |
| chr6:106961506-106961733 | -20.76                    | AIM1                 | 1889                             | +        | +        | +        | Yes                  | intronic                                          | Other           | Aim1              |
| chr9:112676683-112677058 | -62.53                    | AKAP2                | -134008                          | +        | +        | -        | Yes                  | intergenic                                        | Active enhancer | Akap2             |
| chr9:112905742-112906112 | -61.36                    | AKAP2                | 18146                            | +        | +        | -        | Yes                  | intronic                                          | Active enhancer | Akap2             |
| chr9:112736707-112737053 | -57.57                    | AKAP2                | -73998                           | +        | +        | -        | No                   | intergenic                                        | Active enhancer | Akap2             |
| chr9:112680572-112681010 | -56.34                    | AKAP2                | -130087                          | +        | +        | -        | Yes                  | intergenic                                        | Active enhancer | Akap2             |
| chr9:112734332-112735046 | -50.08                    | AKAP2                | -76189                           | +        | +        | -        | No                   | intergenic                                        | Active enhancer | Akap2             |
| chr9:112910703-112910966 | -40.57                    | AKAP2                | 23053                            | +        | +        | +        | Yes                  | intronic                                          | Other           | Akap2             |
| chr9:112729944-112730201 | -36.24                    | AKAP2                | -80806                           | +        | +        | -        | No                   | intergenic                                        | Active enhancer | Akap2             |
| chr9:112904697-112904950 | -33.59                    | AKAP2                | 17042                            | +        | +        | -        | Yes                  | intronic                                          | Active enhancer | Akap2             |
| chr9:112729294-112729575 | -30.39                    | AKAP2                | -81444                           | +        | +        | +        | No                   | intergenic                                        | Other           | Akap2             |
| chr9:112890941-112891576 | -27.95                    | AKAP2                | 3477                             | +        | +        | -        | Yes                  | intronic                                          | Active enhancer | Akap2             |
| chr9:112730584-112730917 | -24.96                    | AKAP2                | -80128                           | +        | +        | -        | No                   | intergenic                                        | Active enhancer | Akap2             |
| chr9:112820446-112820842 | -18.05                    | AKAP2                | 9766                             | +        | +        | -        | No                   | intronic                                          | Active enhancer | Akap2             |
| chr9:112906430-112906563 | -17.94                    | AKAP2                | 18715                            | +        | +        | -        | Yes                  | intronic                                          | Active enhancer | Akap2             |
| chr9:112890448-112890530 | -15.94                    | AKAP2                | 2708                             | +        | +        | -        | Yes                  | intronic                                          | Active enhancer | Akap2             |
| chr9:112875120-112875192 | -15.28                    | AKAP2                | -12625                           | +        | +        | -        | Yes                  | intergenic                                        | Active enhancer | Akap2             |
| chr9:117134816-117135772 | -1000.00                  | AKNA                 | 21391                            | +        | +        | -        | Yes                  | intronic                                          | Active enhancer | Akna              |

|                           |        |          |         |   |   |   |     |                   |                 |               |
|---------------------------|--------|----------|---------|---|---|---|-----|-------------------|-----------------|---------------|
| chr9:117160004-117160640  | -80.88 | AKNA     | -3637   | + | + | + | Yes | intergenic        | Other           | Akna          |
| chr9:117129050-117129458  | -65.25 | AKNA     | 27431   | + | + | - | Yes | intronic          | Active enhancer | Akna          |
| chr9:117126915-117127326  | -56.86 | AKNA     | 29565   | + | + | - | Yes | intronic          | Active enhancer | Akna          |
| chr9:117128628-117128900  | -42.53 | AKNA     | 27921   | + | + | - | Yes | intronic          | Active enhancer | Akna          |
| chr9:117147713-117148083  | -36.38 | AKNA     | 8787    | + | + | - | Yes | intronic          | Active enhancer | Akna          |
| chr9:117134300-117134481  | -28.32 | AKNA     | 22295   | + | + | - | Yes | intronic          | Active enhancer | Akna          |
| chr9:117150267-117150504  | -21.02 | AKNA     | 6300    | + | + | + | Yes | intronic          | Other           | Akna          |
| chr3:104245915-104246328  | -61.00 | ALCAM    | -839436 | + | + | + | No  | intergenic        | Other           | Alcam         |
| chr3:104240773-104241134  | -46.01 | ALCAM    | -844604 | + | + | - | No  | intergenic        | Active enhancer | Alcam         |
| chr3:105104804-105105174  | -30.28 | ALCAM    | 19432   | + | + | - | No  | intronic          | Active enhancer | Alcam         |
| chr3:105085447-105085742  | -24.60 | ALCAM    | 37      | + | - | + | No  | promoter,exonic   | Active promoter | Alcam         |
| chr3:104436099-104436337  | -24.15 | ALCAM    | -649339 | + | + | + | No  | intergenic        | Other           | Alcam         |
| chr12:112202297-112202488 | -30.98 | ALDH2    | -2299   | + | - | - | No  | intergenic        | Other           | Aldh2         |
| chr3:119041791-119042187  | -58.77 | ARHGAP31 | 28769   | + | + | + | No  | intronic          | Other           | Arhgap31      |
| chr12:57871535-57872025   | -47.29 | ARHGAP9  | -52     | + | + | + | No  | promoter          | Other           | Arhgap9       |
| chr1:235490103-235490366  | -32.80 | ARID4B   | 568     | + | - | + | No  | promoter,exonic   | Active promoter | Arid4b        |
| chr1:235438769-235438857  | -14.96 | ARID4B   | 51989   | + | - | - | No  | intronic          | Other           | Arid4b        |
| chr5:78183482-78183863    | -55.01 | ARSB     | 98094   | + | + | - | No  | intronic          | Active enhancer | Arsb          |
| chr15:80271156-80271675   | -66.31 | BCL2A1   | -7772   | + | + | - | Yes | intergenic        | Active enhancer | Bcl2a1d       |
| chr15:80269781-80270587   | -56.17 | BCL2A1   | -6541   | + | + | - | Yes | intergenic        | Active enhancer | Bcl2a1d       |
| chr15:80263451-80263869   | -48.09 | BCL2A1   | -17     | + | + | + | Yes | promoter          | Other           | Bcl2a1d       |
| chr15:80304349-80304807   | -42.84 | BCL2A1   | -40935  | + | + | - | No  | intergenic        | Active enhancer | Bcl2a1d       |
| chr15:80303520-80303776   | -28.90 | BCL2A1   | -40005  | + | + | - | No  | intergenic        | Active enhancer | Bcl2a1d       |
| chr15:80302459-80302769   | -28.39 | BCL2A1   | -38971  | + | + | - | No  | intergenic        | Active enhancer | Bcl2a1d       |
| chr15:80300901-80301094   | -28.01 | BCL2A1   | -37354  | + | + | - | No  | intergenic        | Active enhancer | Bcl2a1d       |
| chr15:80254667-80254866   | -23.54 | BCL2A1   | 8877    | + | + | - | Yes | intronic          | Active enhancer | Bcl2a1d       |
| chr15:80260615-80260803   | -21.53 | BCL2A1   | 2934    | + | + | - | Yes | intronic          | Active enhancer | Bcl2a1d       |
| chr2:127883492-127883616  | -14.15 | BIN1     | -18651  | + | + | - | No  | intergenic        | Poised enhancer | Bin1          |
| chr2:127662928-127663005  | -13.58 | BIN1     | 201937  | + | + | - | No  | intergenic        | Active enhancer | Bin1          |
| chr15:40407939-40408316   | -67.99 | BMF      | -7042   | + | + | - | No  | intergenic        | Active enhancer | Bmf           |
| chr15:40390735-40391362   | -48.74 | BMF      | 7239    | + | + | - | No  | intronic          | Active enhancer | Bmf           |
| chr15:40393421-40393794   | -40.88 | BMF      | 4680    | + | + | - | No  | intronic          | Active enhancer | Bmf           |
| chr15:40388503-40388853   | -36.96 | BMF      | 9609    | + | + | - | No  | intronic          | Active enhancer | Bmf           |
| chr15:40385495-40385840   | -26.73 | BMF      | 12620   | + | + | - | No  | intronic          | Active enhancer | Bmf           |
| chr2:200775852-200776085  | -25.50 | C2orf69  | -11     | + | - | + | No  | promoter          | Active promoter | 1700066M21Rik |
| chr2:200776186-200776672  | -25.50 | C2orf69  | 450     | + | - | + | No  | promoter,exonic   | Active promoter | 1700066M21Rik |
| chr7:50187968-50188396    | -49.72 | C7orf72  | 52500   | + | + | - | Yes | intronic          | Active enhancer | 4930415F15Rik |
| chr7:50185407-50185970    | -48.97 | C7orf72  | 50006   | + | + | - | Yes | intronic          | Active enhancer | 4930415F15Rik |
| chr7:50189045-50189191    | -16.24 | C7orf72  | 53436   | + | + | - | Yes | intronic          | Active enhancer | 4930415F15Rik |
| chr7:50183492-50183606    | -14.02 | C7orf72  | 47867   | + | + | - | Yes | intronic          | Active enhancer | 4930415F15Rik |
| chr1:6831228-6831590      | -38.30 | CAMTA1   | -13975  | + | + | - | No  | intergenic        | Active enhancer | Camta1        |
| chr1:6844961-6845163      | -29.59 | CAMTA1   | -322    | + | - | + | No  | promoter          | Active promoter | Camta1        |
| chr1:6837038-6837259      | -22.92 | CAMTA1   | -8236   | + | + | - | No  | intergenic        | Active enhancer | Camta1        |
| chr7:3082648-3083053      | -54.00 | CARD11   | 729     | + | + | + | No  | promoter,intronic | Other           | Card11        |
| chr7:3018072-3018465      | -41.50 | CARD11   | 65311   | + | + | + | No  | intronic          | Other           | Card11        |
| chr7:3132273-3132587      | -27.93 | CARD11   | -48851  | + | + | - | No  | intergenic        | Active enhancer | Card11        |
| chr7:3020184-3020443      | -23.58 | CARD11   | 63266   | + | + | - | No  | intronic          | Active enhancer | Card11        |
| chr16:89034486-89035012   | -79.96 | CBFA2T3  | 8755    | + | + | - | Yes | intronic          | Active enhancer | Cbfa2t3       |
| chr16:89049303-89050759   | -75.63 | CBFA2T3  | -6527   | + | + | - | Yes | intergenic        | Active enhancer | Cbfa2t3       |
| chr16:89038179-89038567   | -54.46 | CBFA2T3  | 5131    | + | + | - | Yes | intronic          | Active enhancer | Cbfa2t3       |
| chr16:89043022-89043762   | -45.52 | CBFA2T3  | 112     | + | + | + | Yes | promoter,exonic   | Other           | Cbfa2t3       |



|                          |          |         |        |   |   |   |     |                   |                 |         |
|--------------------------|----------|---------|--------|---|---|---|-----|-------------------|-----------------|---------|
| chr16:89041975-89042174  | -19.37   | CBFA2T3 | 1430   | + | + | + | Yes | intronic          | Other           | Cbfa2t3 |
| chr16:89041052-89041331  | -18.17   | CBFA2T3 | 2313   | + | + | - | Yes | intronic          | Active enhancer | Cbfa2t3 |
| chr16:89048723-89048867  | -16.34   | CBFA2T3 | -5291  | + | + | - | Yes | intergenic        | Active enhancer | Cbfa2t3 |
| chr6:41990005-41990626   | -1000.00 | CCND3   | 26317  | + | + | - | Yes | intronic          | Active enhancer | Ccnd3   |
| chr6:41992846-41993725   | -132.23  | CCND3   | 23347  | + | + | - | Yes | intronic          | Active enhancer | Ccnd3   |
| chr6:42013306-42013820   | -99.09   | CCND3   | 3069   | + | + | - | Yes | intronic          | Active enhancer | Ccnd3   |
| chr6:41942209-41942541   | -62.79   | CCND3   | -32789 | + | + | - | No  | intergenic        | Active enhancer | Ccnd3   |
| chr6:41975559-41975864   | -43.02   | CCND3   | 40921  | + | + | - | Yes | intronic          | Active enhancer | Ccnd3   |
| chr6:41908458-41908960   | -42.55   | CCND3   | 877    | + | - | + | No  | promoter,intronic | Active promoter | Ccnd3   |
| chr6:41978003-41978745   | -37.57   | CCND3   | 38258  | + | + | - | Yes | intronic          | Active enhancer | Ccnd3   |
| chr6:42016324-42016599   | -35.70   | CCND3   | 171    | + | - | + | No  | promoter,exonic   | Active promoter | Ccnd3   |
| chr6:41987136-41987393   | -33.21   | CCND3   | 29368  | + | + | - | Yes | intronic          | Active enhancer | Ccnd3   |
| chr6:41987852-41988015   | -21.83   | CCND3   | 28699  | + | + | - | Yes | intronic          | Active enhancer | Ccnd3   |
| chr6:41901585-41901670   | -19.71   | CCND3   | 7959   | + | + | - | No  | intergenic        | Active enhancer | Ccnd3   |
| chr6:42007403-42007538   | -19.37   | CCND3   | 9162   | + | + | - | Yes | intronic          | Active enhancer | Ccnd3   |
| chr6:41944098-41944267   | -18.58   | CCND3   | -34596 | + | + | - | No  | intergenic        | Active enhancer | Ccnd3   |
| chr6:109704014-109704589 | -35.25   | CD164   | -539   | + | - | + | No  | promoter          | Active promoter | Cd164   |
| chr6:109702702-109703128 | -34.66   | CD164   | 847    | + | - | + | No  | promoter,intronic | Active promoter | Cd164   |
| chr5:66495755-66496871   | -40.05   | CD180   | -3696  | + | + | - | Yes | intergenic        | Active enhancer | Cd180   |
| chr5:66488977-66489259   | -29.93   | CD180   | 3499   | + | + | + | Yes | intronic          | Other           | Cd180   |
| chr5:66511777-66511961   | -29.25   | CD180   | -19252 | + | + | - | Yes | intergenic        | Active enhancer | Cd180   |
| chr5:66498701-66498934   | -29.12   | CD180   | -6200  | + | + | - | Yes | intergenic        | Active enhancer | Cd180   |
| chr5:66502884-66503042   | -26.61   | CD180   | -10346 | + | + | - | Yes | intergenic        | Active enhancer | Cd180   |
| chr5:66492517-66492876   | -26.39   | CD180   | -79    | + | + | + | Yes | promoter          | Other           | Cd180   |
| chr5:66502322-66502632   | -23.86   | CD180   | -9860  | + | + | - | Yes | intergenic        | Active enhancer | Cd180   |
| chr5:66499959-66500242   | -23.74   | CD180   | -7483  | + | + | - | Yes | intergenic        | Active enhancer | Cd180   |
| chr5:66494747-66494916   | -19.67   | CD180   | -2214  | + | + | - | Yes | intergenic        | Active enhancer | Cd180   |
| chr19:35810938-35811447  | -79.89   | CD22    | -8877  | + | + | - | Yes | intergenic        | Active enhancer | Cd22    |
| chr19:35814131-35815393  | -58.82   | CD22    | -5307  | + | + | + | Yes | intergenic        | Other           | Cd22    |
| chr19:35819795-35820237  | -36.33   | CD22    | -53    | + | + | + | Yes | promoter          | Other           | Cd22    |
| chr19:35823824-35823970  | -18.35   | CD22    | 3825   | + | + | - | Yes | intronic          | Active enhancer | Cd22    |
| chr20:44747312-44748159  | -66.52   | CD40    | 829    | + | - | + | No  | promoter,intronic | Active promoter | Cd40    |
| chr20:44749117-44749425  | -35.49   | CD40    | 2365   | + | + | + | No  | intronic          | Other           | Cd40    |
| chr11:60837996-60838137  | -15.18   | CD5     | -31864 | + | - | - | No  | intergenic        | Other           | Cd5     |
| chr17:7482776-7483017    | -41.17   | CD68    | 90     | + | + | - | No  | promoter,exonic   | Other           | Cd68    |
| chr12:9917552-9917668    | -23.83   | CD69    | -4113  | + | + | - | No  | intergenic        | Active enhancer | Cd69    |
| chr9:35618210-35620235   | -1000.00 | CD72    | -798   | + | + | + | No  | promoter          | Other           | Cd72    |
| chr9:35616918-35617436   | -37.01   | CD72    | 1247   | + | + | + | No  | exonic            | Other           | Cd72    |
| chr11:44630212-44631576  | -86.62   | CD82    | 43753  | + | + | - | Yes | intronic          | Active enhancer | Cd82    |
| chr11:44622406-44623049  | -66.21   | CD82    | 35586  | + | + | - | Yes | intronic          | Active enhancer | Cd82    |
| chr11:44623167-44623335  | -66.21   | CD82    | 36110  | + | + | - | Yes | intronic          | Active enhancer | Cd82    |
| chr11:44581024-44581510  | -58.93   | CD82    | -5874  | + | + | - | No  | intergenic        | Active enhancer | Cd82    |
| chr11:44633977-44634168  | -52.18   | CD82    | 46931  | + | + | - | Yes | intronic          | Active enhancer | Cd82    |
| chr11:44633324-44633794  | -42.12   | CD82    | 46418  | + | + | - | Yes | intronic          | Active enhancer | Cd82    |
| chr11:44625618-44626121  | -38.51   | CD82    | 38728  | + | + | + | Yes | intronic          | Other           | Cd82    |
| chr11:44590233-44590555  | -35.29   | CD82    | 3253   | + | + | - | No  | intronic          | Active enhancer | Cd82    |
| chr11:44590751-44591048  | -35.29   | CD82    | 3758   | + | + | - | No  | intronic          | Active enhancer | Cd82    |
| chr11:44626505-44626680  | -18.37   | CD82    | 39451  | + | + | + | Yes | intronic          | Other           | Cd82    |
| chr3:121810483-121811010 | -88.34   | CD86    | 14050  | + | + | - | No  | intronic          | Active enhancer | Cd86    |
| chr3:121796495-121796888 | -42.35   | CD86    | -5     | + | + | + | No  | promoter          | Other           | Cd86    |
| chr3:121797174-121797756 | -29.84   | CD86    | 769    | + | + | + | No  | promoter,intronic | Other           | Cd86    |

|                           |         |          |        |   |   |   |     |                   |                          |          |
|---------------------------|---------|----------|--------|---|---|---|-----|-------------------|--------------------------|----------|
| chr3:121811313-121811539  | -20.75  | CD86     | 14730  | + | + | - | No  | intronic          | Active enhancer          | Cd86     |
| chr3:121796022-121796218  | -17.70  | CD86     | -576   | + | + | + | No  | promoter          | Other                    | Cd86     |
| chr5:130715417-130715691  | -27.25  | CDC42SE2 | 115852 | + | + | - | No  | intronic          | Active enhancer          | Cdc42se2 |
| chr5:130560211-130560462  | -24.13  | CDC42SE2 | -39366 | + | + | - | No  | intergenic        | Active enhancer          | Cdc42se2 |
| chr7:90366481-90366973    | -76.43  | CDK14    | 27597  | + | + | - | No  | intronic          | Active enhancer          | Cdk14    |
| chr7:90401761-90402122    | -68.04  | CDK14    | 62811  | + | + | - | No  | intronic          | Active enhancer          | Cdk14    |
| chr7:90384183-90384473    | -46.73  | CDK14    | 45198  | + | + | - | No  | intronic          | Active enhancer          | Cdk14    |
| chr7:90339468-90339569    | -21.39  | CDK14    | 388    | + | - | + | No  | promoter,intronic | Active promoter          | Cdk14    |
| chr4:175204907-175205135  | -25.41  | CEP44    | -34    | + | - | + | No  | promoter          | Active promoter          | Cep44    |
| chr19:8259897-8260554     | -92.30  | CERS4    | -13992 | + | + | - | No  | intergenic        | Active enhancer          | Cers4    |
| chr19:8258091-8259758     | -72.19  | CERS4    | -15293 | + | + | - | No  | intergenic        | Active enhancer          | Cers4    |
| chr19:8257900-8257964     | -67.45  | CERS4    | -16285 | + | + | - | No  | intergenic        | Active enhancer          | Cers4    |
| chr19:8275287-8275893     | -45.43  | CERS4    | 1373   | + | + | + | No  | exonic            | Other                    | Cers4    |
| chr19:8256883-8257644     | -45.16  | CERS4    | -16954 | + | + | - | No  | intergenic        | Active enhancer          | Cers4    |
| chr2:101011698-101012056  | -35.18  | CHST10   | 22253  | + | + | - | No  | intronic          | Active enhancer          | Chst10   |
| chr16:10985375-10986065   | -125.00 | CIITA    | 14665  | + | + | - | Yes | intronic          | Active enhancer          | Ciita    |
| chr16:10962258-10963006   | -104.34 | CIITA    | -8423  | + | + | - | Yes | intergenic        | Active enhancer          | Ciita    |
| chr16:10982125-10982770   | -51.38  | CIITA    | 11392  | + | + | + | Yes | intronic          | Other                    | Ciita    |
| chr16:10958624-10959111   | -48.60  | CIITA    | -12188 | + | + | - | Yes | intergenic        | Active enhancer          | Ciita    |
| chr16:10965389-10965927   | -46.69  | CIITA    | -5397  | + | + | - | Yes | intergenic        | Active enhancer          | Ciita    |
| chr16:10964056-10964391   | -44.28  | CIITA    | -6832  | + | + | - | Yes | intergenic        | Active enhancer          | Ciita    |
| chr16:10980741-10981175   | -41.12  | CIITA    | 9903   | + | + | + | Yes | intronic          | Other                    | Ciita    |
| chr16:10990004-10990932   | -39.17  | CIITA    | 19413  | + | + | - | Yes | intronic          | Active enhancer          | Ciita    |
| chr16:10970796-10971066   | -34.22  | CIITA    | -124   | + | - | + | Yes | promoter          | Active promoter          | Ciita    |
| chr16:10965023-10965223   | -33.38  | CIITA    | -5932  | + | + | - | Yes | intergenic        | Active enhancer          | Ciita    |
| chr16:10983850-10984024   | -19.83  | CIITA    | 12882  | + | + | - | Yes | intronic          | Active enhancer          | Ciita    |
| chr16:10974532-10974675   | -19.08  | CIITA    | 3548   | + | + | - | Yes | intronic          | Active enhancer          | Ciita    |
| chr16:10972267-10972600   | -15.57  | CIITA    | 1378   | + | - | + | Yes | intronic          | Putative active promoter | Ciita    |
| chr16:10973187-10973249   | -14.50  | CIITA    | 2163   | + | - | + | Yes | intronic          | Putative active promoter | Ciita    |
| chr1:25074784-25075671    | -52.50  | CLIC4    | 3467   | + | + | + | Yes | intronic          | Other                    | Clic4    |
| chr1:25068941-25069283    | -26.33  | CLIC4    | -2648  | + | + | - | Yes | intergenic        | Active enhancer          | Clic4    |
| chr1:25072620-25072988    | -23.05  | CLIC4    | 1044   | + | - | + | Yes | intronic          | Putative active promoter | Clic4    |
| chr6:42896711-42898199    | -77.88  | CNPY3    | 595    | + | - | + | No  | promoter,exonic   | Active promoter          | Cnpy3    |
| chr1:24239588-24240180    | -146.72 | CNR2     | -67    | + | + | + | Yes | promoter          | Other                    | Cnr2     |
| chr1:24242674-24243057    | -87.40  | CNR2     | -3048  | + | + | - | Yes | intergenic        | Active enhancer          | Cnr2     |
| chr1:24243161-24243536    | -87.40  | CNR2     | -3531  | + | + | - | Yes | intergenic        | Active enhancer          | Cnr2     |
| chr1:24235141-24236199    | -73.12  | CNR2     | 4147   | + | + | - | Yes | intronic          | Active enhancer          | Cnr2     |
| chr1:24236694-24237040    | -53.46  | CNR2     | 2950   | + | + | - | Yes | intronic          | Active enhancer          | Cnr2     |
| chr1:24257717-24258288    | -42.03  | CNR2     | -18185 | + | + | - | No  | intergenic        | Active enhancer          | Cnr2     |
| chr1:24237362-24238000    | -30.46  | CNR2     | 2136   | + | + | - | Yes | intronic          | Active enhancer          | Cnr2     |
| chr16:84627815-84628196   | -62.05  | COTL1    | 23697  | + | + | + | Yes | intronic          | Other                    | Cotl1    |
| chr16:84633162-84633721   | -53.81  | COTL1    | 18261  | + | + | + | Yes | intronic          | Other                    | Cotl1    |
| chr16:84641415-84641707   | -39.60  | COTL1    | 10141  | + | + | - | Yes | intronic          | Active enhancer          | Cotl1    |
| chr16:84631146-84631532   | -39.00  | COTL1    | 20363  | + | + | - | Yes | intronic          | Active enhancer          | Cotl1    |
| chr16:84650303-84650519   | -24.40  | COTL1    | 1291   | + | + | + | No  | intronic          | Other                    | Cotl1    |
| chr16:84634435-84634774   | -23.43  | COTL1    | 17098  | + | + | - | Yes | intronic          | Active enhancer          | Cotl1    |
| chr18:77385179-77385614   | -89.30  | CTDP1    | -54405 | + | + | - | No  | intergenic        | Poised enhancer          | Ctdp1    |
| chr11:118741000-118741890 | -93.30  | CXCR5    | -13030 | + | + | + | Yes | intergenic        | Other                    | Cxcr5    |
| chr11:118766176-118766781 | -74.16  | CXCR5    | 2377   | + | + | - | Yes | intronic          | Active enhancer          | Cxcr5    |
| chr11:118747500-118747927 | -61.85  | CXCR5    | -6762  | + | + | - | Yes | intergenic        | Active enhancer          | Cxcr5    |
| chr11:118722724-118723243 | -34.03  | CXCR5    | -31492 | + | + | - | Yes | intergenic        | Active enhancer          | Cxcr5    |

|                           |          |         |        |   |   |   |     |                   |                          |               |
|---------------------------|----------|---------|--------|---|---|---|-----|-------------------|--------------------------|---------------|
| chr11:118728256-118728613 | -33.16   | CXCR5   | -26041 | + | + | - | Yes | intergenic        | Active enhancer          | Cxcr5         |
| chr11:118757462-118757821 | -22.51   | CXCR5   | 3166   | + | + | - | Yes | intronic          | Active enhancer          | Cxcr5         |
| chr11:118754345-118754543 | -22.25   | CXCR5   | -31    | + | + | + | Yes | promoter          | Other                    | Cxcr5         |
| chr11:118743046-118743177 | -17.80   | CXCR5   | -11364 | + | + | - | Yes | intergenic        | Active enhancer          | Cxcr5         |
| chrX:30595897-30596102    | -27.95   | CXorf21 | 34     | + | - | + | No  | promoter,exonic   | Active promoter          | 5430427O19Rik |
| chr5:139049373-139050437  | -1000.00 | CXXC5   | 21604  | + | + | + | Yes | intronic          | Other                    | Cxxc5         |
| chr5:139015573-139016179  | -69.07   | CXXC5   | -12425 | + | + | - | Yes | intergenic        | Active enhancer          | Cxxc5         |
| chr5:139028805-139029694  | -37.62   | CXXC5   | 948    | + | - | + | Yes | promoter,intronic | Active promoter          | Cxxc5         |
| chr5:139034091-139034337  | -30.17   | CXXC5   | 5913   | + | + | - | Yes | intronic          | Active enhancer          | Cxxc5         |
| chr5:139031791-139031975  | -22.79   | CXXC5   | 3582   | + | + | - | Yes | intronic          | Active enhancer          | Cxxc5         |
| chr5:139043846-139044061  | -22.54   | CXXC5   | 15652  | + | + | - | Yes | intronic          | Active enhancer          | Cxxc5         |
| chr5:139047536-139047870  | -20.51   | CXXC5   | 19402  | + | + | + | Yes | intronic          | Other                    | Cxxc5         |
| chr5:139048292-139048461  | -16.84   | CXXC5   | 20075  | + | + | + | Yes | intronic          | Other                    | Cxxc5         |
| chr5:139018212-139018330  | -16.18   | CXXC5   | -10030 | + | + | - | Yes | intergenic        | Active enhancer          | Cxxc5         |
| chrX:37655946-37656514    | -1000.00 | CYBB    | 16960  | + | + | - | No  | intronic          | Active enhancer          | Cybb          |
| chrX:37614223-37614719    | -119.50  | CYBB    | -24799 | + | + | - | No  | intergenic        | Active enhancer          | Cybb          |
| chrX:37646599-37647062    | -34.21   | CYBB    | 7560   | + | + | - | No  | intronic          | Active enhancer          | Cybb          |
| chrX:37645892-37646207    | -31.98   | CYBB    | 6779   | + | + | - | No  | intronic          | Active enhancer          | Cybb          |
| chr22:37680761-37681486   | -1000.00 | CYTH4   | 2628   | + | + | - | No  | intronic          | Active enhancer          | Cyth4         |
| chr22:37702930-37703470   | -58.44   | CYTH4   | 24705  | + | + | - | No  | intronic          | Active enhancer          | Cyth4         |
| chr19:42705581-42706091   | -76.89   | DEDD2   | 16108  | + | + | - | No  | intronic          | Active enhancer          | Dedd2         |
| chr19:42706236-42706328   | -76.89   | DEDD2   | 15662  | + | + | - | No  | intronic          | Active enhancer          | Dedd2         |
| chr19:42703279-42703529   | -40.22   | DEDD2   | 18540  | + | + | - | No  | exonic            | Active enhancer          | Dedd2         |
| chr19:42703874-42703951   | -16.14   | DEDD2   | 18032  | + | + | - | No  | exonic            | Active enhancer          | Dedd2         |
| chr6:35267463-35267833    | -55.93   | DEF6    | 2053   | + | + | - | No  | intronic          | Active enhancer          | Def6          |
| chr6:35265935-35266298    | -37.31   | DEF6    | 521    | + | + | + | No  | promoter,intronic | Other                    | Def6          |
| chr6:35265566-35265706    | -17.17   | DEF6    | 41     | + | - | + | No  | promoter,exonic   | Active promoter          | Def6          |
| chr22:24160851-24161274   | -71.56   | DERL3   | 20137  | + | + | - | No  | intergenic        | Active enhancer          | Derl3         |
| chr22:24186644-24186863   | -29.00   | DERL3   | -5554  | + | + | - | No  | intergenic        | Active enhancer          | Derl3         |
| chr2:183582114-183582481  | -56.61   | DNAJC10 | 1529   | + | - | + | Yes | intronic          | Putative active promoter | Dnajc10       |
| chr2:183580452-183580847  | -55.40   | DNAJC10 | -119   | + | - | + | Yes | promoter          | Active promoter          | Dnajc10       |
| chr13:99698508-99698864   | -53.19   | DOCK9   | 39974  | + | + | - | No  | intronic          | Active enhancer          | Dock9         |
| chr2:74798313-74798623    | -40.89   | DOK1    | 16956  | + | + | - | No  | intergenic        | Active enhancer          | Dok1          |
| chr2:74801037-74801454    | -35.51   | DOK1    | 19733  | + | + | - | No  | intergenic        | Active enhancer          | Dok1          |
| chr12:113512880-113513823 | -1000.00 | DTX1    | 17689  | + | + | - | Yes | intronic          | Active enhancer          | Dtx1          |
| chr12:113488569-113489000 | -65.15   | DTX1    | -6878  | + | + | - | Yes | intergenic        | Active enhancer          | Dtx1          |
| chr12:113490128-113490514 | -47.20   | DTX1    | -5341  | + | + | - | Yes | intergenic        | Active enhancer          | Dtx1          |
| chr12:113500226-113500750 | -46.21   | DTX1    | 4826   | + | + | - | Yes | intronic          | Active enhancer          | Dtx1          |
| chr12:113506083-113506526 | -42.43   | DTX1    | 10642  | + | + | - | Yes | intronic          | Active enhancer          | Dtx1          |
| chr12:113507821-113508376 | -41.52   | DTX1    | 12436  | + | + | - | Yes | intronic          | Active enhancer          | Dtx1          |
| chr12:113502551-113503187 | -40.16   | DTX1    | 7207   | + | + | - | Yes | intronic          | Active enhancer          | Dtx1          |
| chr12:113524123-113525306 | -35.42   | DTX1    | 29052  | + | + | - | Yes | intronic          | Active enhancer          | Dtx1          |
| chr12:113487835-113488175 | -34.73   | DTX1    | -7657  | + | + | - | Yes | intergenic        | Active enhancer          | Dtx1          |
| chr12:113498451-113498682 | -20.50   | DTX1    | 2904   | + | + | - | Yes | intronic          | Active enhancer          | Dtx1          |
| chr2:96829428-96830058    | -115.53  | DUSP2   | -18564 | + | + | - | Yes | intergenic        | Active enhancer          | Dusp2         |
| chr2:96811241-96812592    | -83.62   | DUSP2   | -737   | + | + | + | Yes | promoter          | Other                    | Dusp2         |
| chr2:96830424-96830768    | -73.08   | DUSP2   | -19417 | + | + | + | Yes | intergenic        | Other                    | Dusp2         |
| chr2:96822760-96823092    | -44.17   | DUSP2   | -11747 | + | + | - | Yes | intergenic        | Active enhancer          | Dusp2         |
| chr2:96827748-96828029    | -36.32   | DUSP2   | -16709 | + | + | - | Yes | intergenic        | Active enhancer          | Dusp2         |
| chr2:96823519-96823869    | -30.71   | DUSP2   | -12515 | + | + | - | Yes | intergenic        | Active enhancer          | Dusp2         |
| chr2:96814259-96814504    | -20.20   | DUSP2   | -3202  | + | + | - | Yes | intergenic        | Active enhancer          | Dusp2         |

|                           |         |         |        |   |   |   |     |                   |                          |         |
|---------------------------|---------|---------|--------|---|---|---|-----|-------------------|--------------------------|---------|
| chr2:96825198-96825429    | -16.28  | DUSP2   | -14134 | + | + | - | Yes | intergenic        | Active enhancer          | Dusp2   |
| chr20:32273183-32273397   | -22.40  | E2F1    | 920    | + | - | + | No  | promoter,intronic | Active promoter          | E2f1    |
| chr1:21660630-21661313    | -54.60  | ECE1    | 11063  | + | + | + | No  | intronic          | Other                    | Ece1    |
| chr1:21663047-21663493    | -39.55  | ECE1    | 8764   | + | + | - | No  | intronic          | Active enhancer          | Ece1    |
| chr1:21651745-21652040    | -32.88  | ECE1    | 20142  | + | + | - | No  | intronic          | Active enhancer          | Ece1    |
| chr1:21651209-21651365    | -17.34  | ECE1    | 20747  | + | + | - | No  | intronic          | Active enhancer          | Ece1    |
| chr10:11725530-11725978   | -98.50  | ECHDC3  | -58602 | + | + | - | Yes | intergenic        | Active enhancer          | Echdc3  |
| chr10:11726139-11727540   | -98.50  | ECHDC3  | -57517 | + | + | + | Yes | intergenic        | Other                    | Echdc3  |
| chr10:11719463-11720490   | -67.33  | ECHDC3  | -64380 | + | + | - | Yes | intergenic        | Active enhancer          | Echdc3  |
| chr10:11727829-11728168   | -52.38  | ECHDC3  | -56358 | + | + | - | Yes | intergenic        | Active enhancer          | Echdc3  |
| chr10:11724323-11724557   | -23.17  | ECHDC3  | -59916 | + | + | - | Yes | intergenic        | Active enhancer          | Echdc3  |
| chr7:36231586-36232114    | -77.38  | EEPD1   | 39014  | + | + | - | Yes | intronic          | Active enhancer          | Eepd1   |
| chr7:36230022-36230337    | -27.23  | EEPD1   | 37343  | + | + | - | Yes | intronic          | Active enhancer          | Eepd1   |
| chr10:64612830-64613131   | -50.03  | EGR2    | -34053 | + | + | - | No  | intergenic        | Active enhancer          | Egr2    |
| chr10:64576355-64576917   | -48.62  | EGR2    | -510   | + | - | + | No  | promoter          | Active promoter          | Egr2    |
| chr8:22562397-22562977    | -63.22  | EGR3    | -11872 | + | + | + | No  | intergenic        | Other                    | Egr3    |
| chr8:22558477-22559187    | -40.28  | EGR3    | -8017  | + | + | - | No  | intergenic        | Active enhancer          | Egr3    |
| chr15:42259968-42260445   | -75.66  | EHD4    | 4549   | + | + | - | No  | intronic          | Active enhancer          | Ehd4    |
| chr15:42262143-42262532   | -44.67  | EHD4    | 2418   | + | + | - | No  | intronic          | Active enhancer          | Ehd4    |
| chr15:42263823-42264027   | -20.15  | EHD4    | 830    | + | - | + | No  | promoter,intronic | Active promoter          | Ehd4    |
| chr2:88906208-88906563    | -46.07  | EIF2AK3 | 20709  | + | + | - | Yes | intronic          | Active enhancer          | Eif2ak3 |
| chr2:88899111-88899381    | -39.31  | EIF2AK3 | 27848  | + | + | - | Yes | intronic          | Active enhancer          | Eif2ak3 |
| chr2:88927615-88927754    | -16.26  | EIF2AK3 | -590   | + | - | + | No  | promoter          | Active promoter          | Eif2ak3 |
| chr12:96602333-96603277   | -110.49 | ELK3    | 14598  | + | + | - | Yes | intronic          | Active enhancer          | Elk3    |
| chr12:96605798-96606145   | -66.06  | ELK3    | 17764  | + | + | - | Yes | intronic          | Active enhancer          | Elk3    |
| chr12:96588184-96588475   | -57.44  | ELK3    | 122    | + | - | + | Yes | promoter,exonic   | Active promoter          | Elk3    |
| chr12:96608746-96609182   | -53.69  | ELK3    | 20757  | + | + | - | Yes | intronic          | Active enhancer          | Elk3    |
| chr12:96592791-96593140   | -50.33  | ELK3    | 4758   | + | + | - | Yes | intronic          | Active enhancer          | Elk3    |
| chr12:96589199-96589597   | -47.72  | ELK3    | 1191   | + | - | + | Yes | intronic          | Putative active promoter | Elk3    |
| chr12:96584279-96584532   | -34.10  | ELK3    | -3802  | + | + | - | Yes | intergenic        | Active enhancer          | Elk3    |
| chr12:96537210-96537561   | -31.49  | ELK3    | -50822 | + | + | - | No  | intergenic        | Active enhancer          | Elk3    |
| chr12:96540627-96541186   | -30.13  | ELK3    | -47301 | + | + | + | No  | intergenic        | Other                    | Elk3    |
| chr12:96582727-96582835   | -21.92  | ELK3    | -5426  | + | + | - | Yes | intergenic        | Active enhancer          | Elk3    |
| chr12:96607432-96607555   | -17.69  | ELK3    | 19286  | + | + | - | Yes | intronic          | Active enhancer          | Elk3    |
| chr12:96604135-96604264   | -14.88  | ELK3    | 15992  | + | + | - | Yes | intronic          | Active enhancer          | Elk3    |
| chr14:100531571-100531740 | -35.67  | EVL     | -96    | + | - | + | No  | promoter          | Active promoter          | Evl     |
| chr14:100534875-100535426 | -35.41  | EVL     | 3399   | + | + | + | No  | intronic          | Other                    | Evl     |
| chr14:100532628-100532876 | -32.82  | EVL     | 1001   | + | + | + | No  | intronic          | Other                    | Evl     |
| chr14:100539170-100539584 | -26.38  | EVL     | 7626   | + | + | - | No  | intronic          | Active enhancer          | Evl     |
| chr6:159239967-159240104  | -23.62  | EZR     | 421    | + | - | + | Yes | promoter,intronic | Active promoter          | Ezr     |
| chr6:159240473-159240666  | -21.95  | EZR     | -113   | + | + | + | Yes | promoter          | Other                    | Ezr     |
| chr8:11314163-11314442    | -81.26  | FAM167A | 9974   | + | - | - | No  | intronic          | Other                    | Fam167a |
| chr8:11275397-11275870    | -72.32  | FAM167A | 48643  | + | + | - | No  | intergenic        | Active enhancer          | Fam167a |
| chr8:11276891-11277291    | -42.81  | FAM167A | 47185  | + | + | - | No  | intergenic        | Active enhancer          | Fam167a |
| chr2:16836173-16836670    | -98.99  | FAM49A  | 10713  | + | + | - | No  | intronic          | Active enhancer          | Fam49a  |
| chr2:16806398-16807423    | -97.53  | FAM49A  | 40224  | + | + | - | No  | intronic          | Active enhancer          | Fam49a  |
| chr2:16838197-16838705    | -71.83  | FAM49A  | 8683   | + | + | - | No  | intronic          | Active enhancer          | Fam49a  |
| chr2:16803883-16804204    | -54.13  | FAM49A  | 43091  | + | + | - | No  | intronic          | Active enhancer          | Fam49a  |
| chr2:16835023-16835381    | -40.48  | FAM49A  | 11932  | + | + | - | No  | intronic          | Active enhancer          | Fam49a  |
| chr2:16811724-16812111    | -35.22  | FAM49A  | 35217  | + | + | - | No  | intronic          | Active enhancer          | Fam49a  |
| chr2:16841554-16841742    | -24.05  | FAM49A  | 5486   | + | + | - | No  | intronic          | Active enhancer          | Fam49a  |

|                          |         |        |        |   |   |   |     |                   |                 |        |
|--------------------------|---------|--------|--------|---|---|---|-----|-------------------|-----------------|--------|
| chr2:16839481-16839616   | -21.89  | FAM49A | 7586   | + | + | - | No  | intronic          | Active enhancer | Fam49a |
| chr19:7766895-7767255    | -45.28  | FCER2  | -43    | + | + | - | No  | promoter          | Other           | Fcer2a |
| chr19:7770525-7770876    | -44.99  | FCER2  | -3668  | + | + | - | No  | intergenic        | Active enhancer | Fcer2a |
| chr11:63973017-63973395  | -86.45  | FERMT3 | -946   | + | + | - | No  | promoter          | Other           | Fermt3 |
| chr11:63973883-63974366  | -50.03  | FERMT3 | -28    | + | + | + | No  | promoter          | Other           | Fermt3 |
| chr11:63982621-63982881  | -36.61  | FERMT3 | 8599   | + | + | - | No  | intronic          | Active enhancer | Fermt3 |
| chr11:63975170-63975412  | -19.36  | FERMT3 | 1139   | + | + | + | No  | intronic          | Other           | Fermt3 |
| chr11:63983055-63983179  | -17.61  | FERMT3 | 8965   | + | + | - | No  | intronic          | Active enhancer | Fermt3 |
| chr19:35953357-35953975  | -140.28 | FFAR2  | 13049  | + | + | - | No  | intergenic        | Active enhancer | Ffar2  |
| chr6:37017332-37018406   | -80.96  | FGD2   | 44446  | + | + | - | No  | intergenic        | Active enhancer | Fgd2   |
| chr6:36975241-36975899   | -42.95  | FGD2   | 2147   | + | + | + | No  | intronic          | Other           | Fgd2   |
| chr6:36973270-36973561   | -38.00  | FGD2   | -8     | + | + | + | No  | promoter          | Other           | Fgd2   |
| chr6:37016534-37016996   | -34.95  | FGD2   | 43342  | + | + | - | No  | intergenic        | Active enhancer | Fgd2   |
| chr6:36971851-36972119   | -28.80  | FGD2   | -1438  | + | + | - | No  | promoter          | Other           | Fgd2   |
| chr6:36972390-36972713   | -28.80  | FGD2   | -872   | + | + | - | No  | promoter          | Other           | Fgd2   |
| chr6:36974083-36974266   | -18.49  | FGD2   | 751    | + | - | + | No  | promoter,intronic | Active promoter | Fgd2   |
| chr9:132801722-132802217 | -76.04  | FNBP1  | 3504   | + | + | - | Yes | intronic          | Active enhancer | Fnbp1  |
| chr9:132751318-132751785 | -57.57  | FNBP1  | 53922  | + | + | - | Yes | intronic          | Active enhancer | Fnbp1  |
| chr9:132785320-132785783 | -48.14  | FNBP1  | 19922  | + | + | - | Yes | intronic          | Active enhancer | Fnbp1  |
| chr9:132769718-132770039 | -39.08  | FNBP1  | 35595  | + | + | - | Yes | intronic          | Active enhancer | Fnbp1  |
| chr9:132752614-132753019 | -32.29  | FNBP1  | 52657  | + | + | - | Yes | intronic          | Active enhancer | Fnbp1  |
| chr9:132758591-132759038 | -25.43  | FNBP1  | 46659  | + | + | - | Yes | intronic          | Active enhancer | Fnbp1  |
| chr9:132754661-132754786 | -19.22  | FNBP1  | 50750  | + | + | - | Yes | intronic          | Active enhancer | Fnbp1  |
| chr6:112085511-112085849 | -48.99  | FYN    | -5346  | + | + | - | No  | intergenic        | Active enhancer | Fyn    |
| chr6:112083280-112083608 | -37.62  | FYN    | -3110  | + | + | - | No  | intergenic        | Active enhancer | Fyn    |
| chr6:112072343-112072589 | -27.13  | FYN    | 7868   | + | + | - | No  | intronic          | Active enhancer | Fyn    |
| chr14:55321078-55321276  | -17.54  | GCH1   | 48365  | + | + | - | No  | intronic          | Active enhancer | Gch1   |
| chrX:78394401-78394640   | -26.71  | GPR174 | -31949 | + | + | - | No  | intergenic        | Active enhancer | Gpr174 |
| chr13:99934577-99934967  | -46.26  | GPR18  | -24090 | + | + | - | No  | intergenic        | Active enhancer | Gpr18  |
| chr13:99911308-99911450  | -31.81  | GPR18  | -697   | + | - | - | No  | promoter          | Other           | Gpr18  |
| chr13:99910642-99910764  | -25.56  | GPR18  | -21    | + | - | + | No  | promoter          | Active promoter | Gpr18  |
| chr5:125797929-125798217 | -24.63  | GRAMD3 | -2714  | + | + | - | No  | intergenic        | Active enhancer | Gramd3 |
| chr17:18964754-18965005  | -125.75 | GRAP   | -14543 | + | + | + | No  | intergenic        | Other           | Grap   |
| chr17:18965115-18966259  | -125.75 | GRAP   | -15351 | + | + | + | No  | intergenic        | Other           | Grap   |
| chr17:18966361-18967416  | -125.75 | GRAP   | -16552 | + | + | + | No  | intergenic        | Other           | Grap   |
| chr17:18939129-18940250  | -119.11 | GRAP   | 10647  | + | + | - | Yes | intronic          | Active enhancer | Grap   |
| chr17:18940524-18940677  | -111.16 | GRAP   | 9736   | + | + | - | Yes | intronic          | Active enhancer | Grap   |
| chr17:18941085-18942692  | -85.87  | GRAP   | 8448   | + | + | - | Yes | intronic          | Active enhancer | Grap   |
| chr17:18950112-18950646  | -73.54  | GRAP   | -43    | + | + | + | No  | promoter          | Other           | Grap   |
| chr17:18945728-18946947  | -67.70  | GRAP   | 3999   | + | + | - | Yes | intronic          | Active enhancer | Grap   |
| chr17:18943573-18944122  | -67.01  | GRAP   | 6489   | + | + | - | Yes | intronic          | Active enhancer | Grap   |
| chr17:18942829-18943066  | -18.08  | GRAP   | 7389   | + | + | - | Yes | intronic          | Active enhancer | Grap   |
| chr5:176857878-176859009 | -75.86  | GRK6   | 4756   | + | + | - | No  | intronic          | Active enhancer | Grk6   |
| chr5:176852860-176853002 | -24.67  | GRK6   | -756   | + | + | + | No  | promoter          | Other           | Grk6   |
| chr5:176856294-176856566 | -24.53  | GRK6   | 2743   | + | + | - | No  | intronic          | Active enhancer | Grk6   |
| chr17:42425463-42425937  | -120.66 | GRN    | 3209   | + | + | - | No  | intronic          | Active enhancer | Grn    |
| chr17:42424714-42424907  | -26.04  | GRN    | 2319   | + | + | - | No  | intronic          | Active enhancer | Grn    |
| chr2:43037559-43037622   | -18.60  | HAAO   | -17839 | + | + | + | No  | intergenic        | Other           | HaaO   |
| chr2:43037892-43037924   | -16.83  | HAAO   | -18157 | + | + | + | No  | intergenic        | Other           | HaaO   |
| chr2:43038040-43038435   | -16.08  | HAAO   | -18486 | + | + | + | No  | intergenic        | Other           | HaaO   |
| chr9:100700478-100700925 | -78.14  | HEMGN  | -26    | + | + | - | No  | promoter          | Poised enhancer | Hemgn  |

|                          |          |         |         |   |   |   |     |            |                 |         |
|--------------------------|----------|---------|---------|---|---|---|-----|------------|-----------------|---------|
| chr9:100697124-100697286 | -23.58   | HEMGN   | 3470    | + | + | - | No  | intronic   | Active enhancer | Hemgn   |
| chr16:56945700-56946273  | -76.46   | HERPUD1 | -20016  | + | + | - | No  | intergenic | Active enhancer | Herpud1 |
| chr16:56950931-56951289  | -53.58   | HERPUD1 | -14892  | + | + | - | No  | intergenic | Active enhancer | Herpud1 |
| chr16:56974882-56975374  | -51.60   | HERPUD1 | 9126    | + | + | - | Yes | intronic   | Active enhancer | Herpud1 |
| chr16:56965268-56965799  | -41.81   | HERPUD1 | -469    | + | + | + | Yes | promoter   | Other           | Herpud1 |
| chr16:56976005-56976450  | -39.58   | HERPUD1 | 10225   | + | + | - | Yes | intronic   | Active enhancer | Herpud1 |
| chr7:75370114-75370863   | -60.50   | HIP1    | -2198   | + | + | - | No  | intergenic | Active enhancer | Hip1    |
| chr7:75292144-75292718   | -42.79   | HIP1    | 75859   | + | + | + | No  | intronic   | Other           | Hip1    |
| chr7:75368857-75369068   | -39.70   | HIP1    | -672    | + | - | + | No  | promoter   | Active promoter | Hip1    |
| chr7:75319662-75319819   | -18.60   | HIP1    | 48550   | + | + | - | No  | intronic   | Active enhancer | Hip1    |
| chr4:83295181-83295431   | -30.02   | HNRNPD  | -157    | + | - | + | No  | promoter   | Active promoter | Hnrnpd  |
| chr4:11101597-11102093   | -83.67   | HS3ST1  | 328692  | + | - | - | No  | intergenic | Other           | Hs3st1  |
| chr4:11100110-11100495   | -50.76   | HS3ST1  | 330235  | + | + | - | No  | intergenic | Active enhancer | Hs3st1  |
| chr19:16252005-16252386  | -43.90   | HSH2D   | 7357    | + | + | - | Yes | intronic   | Active enhancer | Hsh2d   |
| chr19:16253771-16254080  | -35.88   | HSH2D   | 9087    | + | + | - | Yes | intronic   | Active enhancer | Hsh2d   |
| chr19:16254298-16254505  | -33.46   | HSH2D   | 9563    | + | + | + | Yes | intronic   | Other           | Hsh2d   |
| chr19:16255681-16255956  | -22.45   | HSH2D   | 10980   | + | + | - | Yes | intronic   | Active enhancer | Hsh2d   |
| chr19:16260693-16260867  | -21.58   | HSH2D   | 15942   | + | + | - | Yes | intronic   | Active enhancer | Hsh2d   |
| chr2:8723664-8724140     | -87.38   | ID2     | -98211  | + | + | - | No  | intergenic | Active enhancer | Id2     |
| chr2:8716866-8717272     | -56.46   | ID2     | -105044 | + | + | - | No  | intergenic | Active enhancer | Id2     |
| chr2:8718560-8718977     | -47.49   | ID2     | -103345 | + | + | - | No  | intergenic | Active enhancer | Id2     |
| chr2:8666024-8666440     | -43.94   | ID2     | -155881 | + | + | - | No  | intergenic | Active enhancer | Id2     |
| chr2:8655435-8655852     | -37.01   | ID2     | -166470 | + | + | - | No  | intergenic | Active enhancer | Id2     |
| chr2:8715517-8715761     | -29.82   | ID2     | -106474 | + | + | + | No  | intergenic | Other           | Id2     |
| chr2:8692479-8692908     | -27.55   | ID2     | -129420 | + | + | + | No  | intergenic | Other           | Id2     |
| chr2:8656197-8656371     | -22.38   | ID2     | -165829 | + | + | - | No  | intergenic | Active enhancer | Id2     |
| chr2:8714454-8714665     | -20.60   | ID2     | -107554 | + | + | - | No  | intergenic | Active enhancer | Id2     |
| chr2:8713835-8713927     | -20.37   | ID2     | -108232 | + | + | - | No  | intergenic | Active enhancer | Id2     |
| chr21:34746324-34747032  | -57.29   | IFNGR2  | -28524  | + | + | + | Yes | intergenic | Other           | Ifngr2  |
| chr21:34755342-34756337  | -52.81   | IFNGR2  | -19363  | + | + | + | Yes | intergenic | Other           | Ifngr2  |
| chr21:34752863-34753235  | -38.21   | IFNGR2  | -22153  | + | + | - | Yes | intergenic | Active enhancer | Ifngr2  |
| chr1:24515794-24517906   | -1000.00 | IFNLR1  | -3085   | + | + | - | Yes | intergenic | Active enhancer | Ifnlr1  |
| chr1:24513804-24514328   | -29.53   | IFNLR1  | -301    | + | + | + | No  | promoter   | Other           | Ifnlr1  |
| chr3:129155280-129155549 | -38.14   | IFT122  | -3465   | + | + | - | No  | intergenic | Active enhancer | Ift122  |
| chr3:129153875-129153997 | -15.94   | IFT122  | -4943   | + | + | + | No  | intergenic | Other           | Ift122  |
| chr3:159640800-159641036 | -22.24   | IL12A   | -65705  | + | + | - | No  | intergenic | Active enhancer | Il12a   |
| chr16:27309443-27309889  | -65.00   | IL4R    | -15564  | + | + | - | Yes | intergenic | Active enhancer | Il4ra   |
| chr16:27312773-27313107  | -50.54   | IL4R    | -12290  | + | + | - | Yes | intergenic | Active enhancer | Il4ra   |
| chr16:27329798-27330146  | -36.76   | IL4R    | 4742    | + | + | - | Yes | intronic   | Active enhancer | Il4ra   |
| chr16:27310908-27311021  | -36.08   | IL4R    | -14266  | + | + | - | Yes | intergenic | Active enhancer | Il4ra   |
| chr16:27311159-27311387  | -36.08   | IL4R    | -13957  | + | + | - | Yes | intergenic | Active enhancer | Il4ra   |
| chr16:27326751-27326884  | -18.82   | IL4R    | 1587    | + | + | + | Yes | intronic   | Other           | Il4ra   |
| chr1:154379710-154380285 | -1000.00 | IL6R    | 2328    | + | + | - | No  | intronic   | Active enhancer | Il6ra   |
| chr1:154385777-154385990 | -30.55   | IL6R    | 8214    | + | + | - | No  | intronic   | Active enhancer | Il6ra   |
| chr1:154380806-154381035 | -23.33   | IL6R    | 3251    | + | + | - | No  | intronic   | Active enhancer | Il6ra   |
| chr3:121713860-121714586 | -101.40  | ILDR1   | 26904   | + | + | - | No  | intronic   | Active enhancer | Ildr1   |
| chr3:121721920-121722376 | -53.85   | ILDR1   | 18979   | + | + | - | No  | intronic   | Active enhancer | Ildr1   |
| chr3:121716840-121717125 | -35.87   | ILDR1   | 24145   | + | + | - | No  | intronic   | Active enhancer | Ildr1   |
| chr3:121711429-121711880 | -29.96   | ILDR1   | 29473   | + | + | - | No  | intronic   | Active enhancer | Ildr1   |
| chr3:13125335-13125813   | -77.67   | IQSEC1  | -10957  | + | + | - | No  | intergenic | Active enhancer | Iqsec1  |
| chr3:13056423-13057384   | -63.26   | IQSEC1  | -47705  | + | + | - | No  | intergenic | Active enhancer | Iqsec1  |

|                           |        |          |         |   |   |   |     |                   |                          |               |
|---------------------------|--------|----------|---------|---|---|---|-----|-------------------|--------------------------|---------------|
| chr3:13053774-13054234    | -55.15 | IQSEC1   | -44806  | + | + | - | No  | intergenic        | Active enhancer          | lqsec1        |
| chr3:13058383-13058530    | -47.76 | IQSEC1   | -49258  | + | + | - | No  | intergenic        | Active enhancer          | lqsec1        |
| chr3:13057620-13058212    | -47.76 | IQSEC1   | -48718  | + | + | + | No  | intergenic        | Other                    | lqsec1        |
| chr3:13129380-13129858    | -43.75 | IQSEC1   | -15002  | + | + | - | No  | intergenic        | Active enhancer          | lqsec1        |
| chr3:13127998-13128511    | -43.60 | IQSEC1   | -13637  | + | + | - | No  | intergenic        | Active enhancer          | lqsec1        |
| chr3:13050801-13051110    | -42.44 | IQSEC1   | -41757  | + | + | - | No  | intergenic        | Active enhancer          | lqsec1        |
| chr3:13053158-13053395    | -41.46 | IQSEC1   | -44078  | + | + | - | No  | intergenic        | Active enhancer          | lqsec1        |
| chr3:13062510-13062936    | -38.14 | IQSEC1   | 51894   | + | + | + | No  | intronic          | Other                    | lqsec1        |
| chr3:13152185-13152507    | -27.12 | IQSEC1   | -37729  | + | + | - | No  | intergenic        | Active enhancer          | lqsec1        |
| chr6:471222-471459        | -17.55 | IRF4     | 79601   | - | + | - | No  | intergenic        | Poised enhancer          | lrf4          |
| chr6:490225-490373        | -17.02 | IRF4     | 98560   | + | + | - | No  | intergenic        | Active enhancer          | lrf4          |
| chr6:376922-377024        | -17.02 | IRF4     | -14766  | - | + | - | No  | intergenic        | Poised enhancer          | lrf4          |
| chr7:128580606-128580853  | -24.11 | IRF5     | 5       | + | + | - | No  | promoter,exonic   | Poised promoter          | lrf5          |
| chr10:33403347-33403858   | -94.93 | ITGB1    | -156309 | + | + | - | No  | intergenic        | Active enhancer          | ltgb1         |
| chr10:33384802-33385146   | -46.53 | ITGB1    | -137681 | + | + | - | No  | intergenic        | Active enhancer          | ltgb1         |
| chr10:33260767-33260936   | -33.01 | ITGB1    | -13558  | + | + | - | No  | intergenic        | Active enhancer          | ltgb1         |
| chr10:33250503-33250821   | -27.29 | ITGB1    | -3369   | + | + | - | No  | intergenic        | Active enhancer          | ltgb1         |
| chr10:33284852-33284979   | -17.28 | ITGB1    | -37622  | + | + | - | No  | intergenic        | Active enhancer          | ltgb1         |
| chr5:156642114-156642489  | -28.64 | ITK      | 34394   | + | + | - | No  | intronic          | Active enhancer          | ltk           |
| chr5:156644789-156645030  | -22.57 | ITK      | 37002   | + | + | - | No  | exonic            | Active enhancer          | ltk           |
| chr5:156641529-156641746  | -22.21 | ITK      | 33730   | + | + | - | No  | intronic          | Active enhancer          | ltk           |
| chr10:106097269-106098209 | -43.67 | ITPRIP   | 512     | + | - | + | No  | promoter,intronic | Active promoter          | ltprrip       |
| chr6:14910919-14911299    | -53.89 | JARID2   | -335097 | + | + | - | No  | intergenic        | Active enhancer          | Jarid2        |
| chr14:75906684-75907047   | -55.75 | JDP2     | 8028    | + | + | - | No  | intronic          | Active enhancer          | Jdp2          |
| chr14:75937121-75937526   | -43.89 | JDP2     | 38486   | + | + | - | No  | exonic            | Active enhancer          | Jdp2          |
| chr10:65020631-65020993   | -87.04 | JMJD1C   | 8171    | + | + | - | Yes | intronic          | Active enhancer          | Jmjd1c        |
| chr10:65028912-65029185   | -26.11 | JMJD1C   | -65     | + | - | + | Yes | promoter          | Active promoter          | Jmjd1c        |
| chr10:65001670-65001900   | -25.70 | JMJD1C   | 27198   | + | + | - | No  | intronic          | Active enhancer          | Jmjd1c        |
| chr10:65020289-65020473   | -25.09 | JMJD1C   | 8602    | + | + | - | Yes | intronic          | Active enhancer          | Jmjd1c        |
| chr10:65022612-65022791   | -22.30 | JMJD1C   | 6282    | + | + | - | Yes | intronic          | Active enhancer          | Jmjd1c        |
| chr10:65027223-65027369   | -16.80 | JMJD1C   | 1687    | + | - | + | Yes | intronic          | Putative active promoter | Jmjd1c        |
| chr19:12900852-12901205   | -33.23 | JUNB     | -1282   | + | - | + | No  | promoter          | Active promoter          | Junb          |
| chr19:12896571-12896717   | -28.95 | JUNB     | -5666   | + | + | - | No  | intergenic        | Active enhancer          | Junb          |
| chr19:12902163-12902554   | -25.05 | JUNB     | 48      | + | - | + | No  | promoter,intronic | Active promoter          | Junb          |
| chr19:12899668-12899939   | -19.52 | JUNB     | -2507   | + | + | - | No  | intergenic        | Active enhancer          | Junb          |
| chr19:12903296-12903452   | -15.91 | JUNB     | 1064    | + | - | + | No  | intronic          | Putative active promoter | Junb          |
| chr11:17413253-17413415   | -25.91 | KCNJ11   | -2456   | + | + | - | No  | intergenic        | Active enhancer          | Kcnj11        |
| chr11:17413615-17413750   | -18.66 | KCNJ11   | -2804   | + | + | - | No  | intergenic        | Active enhancer          | Kcnj11        |
| chr10:79382592-79383063   | -73.57 | KCNMA1   | 14750   | + | + | + | No  | intronic          | Other                    | Kcnma1        |
| chr19:44281594-44282148   | -53.60 | KCNN4    | 3538    | + | + | - | No  | intronic          | Active enhancer          | Kcnn4         |
| chr19:44281081-44281423   | -44.95 | KCNN4    | 4157    | + | + | - | No  | intronic          | Active enhancer          | Kcnn4         |
| chr19:44282827-44282935   | -23.43 | KCNN4    | 2528    | + | + | - | No  | intronic          | Active enhancer          | Kcnn4         |
| chr6:73332563-73332655    | -32.94 | KCNQ5    | 1038    | + | + | + | No  | intronic          | Other                    | Kcnq5         |
| chr6:73332797-73333047    | -32.94 | KCNQ5    | 1351    | + | - | + | No  | intronic          | Putative active promoter | Kcnq5         |
| chr6:73442562-73443050    | -21.10 | KCNQ5    | 111235  | + | + | - | No  | intronic          | Active enhancer          | Kcnq5         |
| chr6:73329845-73330004    | -18.22 | KCNQ5    | -1647   | + | + | + | No  | promoter          | Other                    | Kcnq5         |
| chr1:175158080-175158510  | -43.08 | KIAA0040 | 3654    | + | + | - | No  | intronic          | Active enhancer          | 4930523C07Rik |
| chr1:175194252-175195046  | -38.88 | KIAA0040 | -32420  | + | + | - | No  | intergenic        | Active enhancer          | 4930523C07Rik |
| chr1:175166669-175167004  | -38.41 | KIAA0040 | -4607   | + | + | - | No  | intergenic        | Active enhancer          | 4930523C07Rik |
| chr1:175178307-175178474  | -32.71 | KIAA0040 | -16161  | + | + | - | No  | intergenic        | Active enhancer          | 4930523C07Rik |
| chr1:175199706-175199983  | -24.81 | KIAA0040 | -37615  | + | + | - | No  | intergenic        | Active enhancer          | 4930523C07Rik |
| chr22:45631123-45631889   | -59.57 | KIAA0930 | 5144    | + | + | - | No  | intronic          | Active enhancer          | 5031439G07Rik |

|                          |        |         |        |   |   |   |     |                   |                          |        |
|--------------------------|--------|---------|--------|---|---|---|-----|-------------------|--------------------------|--------|
| chr3:47333227-47333446   | -32.16 | KIF9    | -8999  | + | + | - | No  | intergenic        | Active enhancer          | Kif9   |
| chr13:74709849-74710153  | -54.24 | KLF12   | -1935  | + | - | + | No  | promoter          | Active promoter          | Klf12  |
| chr13:74561669-74562284  | -53.19 | KLF12   | 146090 | + | + | - | Yes | intronic          | Active enhancer          | Klf12  |
| chr13:74637069-74637455  | -45.35 | KLF12   | 70804  | + | + | - | No  | intronic          | Active enhancer          | Klf12  |
| chr13:74541998-74542412  | -42.19 | KLF12   | 165861 | + | + | - | Yes | intronic          | Active enhancer          | Klf12  |
| chr13:74600988-74601251  | -35.39 | KLF12   | 106947 | + | + | + | No  | intronic          | Other                    | Klf12  |
| chr13:74547066-74547556  | -35.36 | KLF12   | 160755 | + | + | + | Yes | intronic          | Other                    | Klf12  |
| chr13:74547713-74548050  | -33.58 | KLF12   | 160185 | + | + | - | Yes | intronic          | Active enhancer          | Klf12  |
| chr13:74708825-74708936  | -23.98 | KLF12   | -814   | + | - | + | No  | promoter          | Active promoter          | Klf12  |
| chr13:74562735-74562949  | -21.57 | KLF12   | 145224 | + | + | - | Yes | intronic          | Active enhancer          | Klf12  |
| chr13:74530313-74530418  | -15.32 | KLF12   | 177701 | + | + | - | Yes | intronic          | Active enhancer          | Klf12  |
| chr1:241715364-241715698 | -48.88 | KMO     | 20097  | + | + | + | No  | intronic          | Other                    | Kmo    |
| chr1:241695219-241695506 | -21.33 | KMO     | -72    | + | - | + | No  | promoter          | Active promoter          | Kmo    |
| chr1:32715445-32716148   | -92.17 | LCK     | -1044  | + | + | - | Yes | promoter          | Active Enhancer          | Lck    |
| chr1:32716652-32717255   | -62.97 | LCK     | 113    | + | + | + | Yes | promoter,exonic   | Other                    | Lck    |
| chr1:32721424-32721590   | -36.06 | LCK     | 4667   | + | + | - | Yes | intronic          | Active enhancer          | Lck    |
| chr1:32729395-32729791   | -32.80 | LCK     | -10119 | + | + | - | Yes | intergenic        | Active enhancer          | Lck    |
| chr1:32717523-32717953   | -27.45 | LCK     | 898    | + | + | - | Yes | promoter,intronic | Active Enhancer          | Lck    |
| chr1:32720752-32720947   | -17.30 | LCK     | 4009   | + | + | - | Yes | intronic          | Active enhancer          | Lck    |
| chr20:62362073-62362387  | -42.27 | LIME1   | -5748  | + | + | - | No  | intergenic        | Active enhancer          | Lime1  |
| chr20:62359717-62360048  | -26.35 | LIME1   | -8096  | + | + | - | No  | intergenic        | Active enhancer          | Lime1  |
| chr16:11713339-11713658  | -32.62 | LITAF   | -32176 | + | + | - | No  | intergenic        | Active enhancer          | Litaf  |
| chr16:11716279-11716554  | -25.31 | LITAF   | -35094 | + | + | + | No  | intergenic        | Other                    | Litaf  |
| chr11:536666-536759      | -20.27 | LRRRC56 | -810   | + | + | + | No  | promoter          | Other                    | Lrrc56 |
| chr1:90172233-90172432   | -42.43 | LRRRC8C | 73688  | + | + | - | No  | intronic          | Active enhancer          | Lrrc8c |
| chr1:90171843-90172040   | -26.98 | LRRRC8C | 73297  | + | + | - | No  | intronic          | Active enhancer          | Lrrc8c |
| chr1:90185161-90185320   | -24.36 | LRRRC8C | 86596  | + | + | - | No  | intergenic        | Active enhancer          | Lrrc8c |
| chr11:1874085-1874469    | -61.85 | LSP1    | 77     | + | + | + | No  | promoter,exonic   | Other                    | Lsp1   |
| chr11:1871933-1872052    | -21.09 | LSP1    | -2208  | + | + | - | No  | intergenic        | Active enhancer          | Lsp1   |
| chr11:1872264-1872560    | -21.09 | LSP1    | -1788  | + | + | + | No  | promoter          | Poised promoter          | Lsp1   |
| chr6:31550036-31550524   | -47.65 | LTB     | -78    | + | + | + | No  | promoter          | Other                    | Ltb    |
| chr6:31548762-31549457   | -30.47 | LTB     | 1093   | + | - | + | No  | intronic          | Putative active promoter | Ltb    |
| chr6:31547360-31547526   | -16.49 | LTB     | 2759   | + | - | - | No  | intergenic        | Other                    | Ltb    |
| chr6:31547656-31547815   | -16.49 | LTB     | 2467   | + | - | - | No  | intergenic        | Other                    | Ltb    |
| chr1:25911432-25911575   | -19.23 | MAN1C1  | -32456 | + | + | - | No  | intergenic        | Poised enhancer          | Man1c1 |
| chr10:30779206-30779680  | -62.61 | MAP3K8  | 56493  | + | + | - | No  | intergenic        | Active enhancer          | Map3k8 |
| chr10:30722096-30723758  | -58.59 | MAP3K8  | -23    | + | + | + | No  | promoter          | Other                    | Map3k8 |
| chr10:30783462-30783819  | -58.25 | MAP3K8  | 60690  | + | + | - | No  | intergenic        | Active enhancer          | Map3k8 |
| chr10:30818409-30818911  | -50.10 | MAP3K8  | 95710  | + | + | + | No  | intergenic        | Other                    | Map3k8 |
| chr10:30777190-30777650  | -49.78 | MAP3K8  | 54470  | + | + | + | No  | intergenic        | Other                    | Map3k8 |
| chr10:30782664-30783282  | -48.67 | MAP3K8  | 60023  | + | + | - | No  | intergenic        | Active enhancer          | Map3k8 |
| chr10:30716476-30716869  | -46.69 | MAP3K8  | -6278  | + | + | - | No  | intergenic        | Active enhancer          | Map3k8 |
| chr10:30723887-30723907  | -40.38 | MAP3K8  | 947    | + | - | + | No  | promoter,intronic | Active promoter          | Map3k8 |
| chr10:30786732-30786984  | -28.82 | MAP3K8  | 63908  | + | + | - | No  | intergenic        | Active enhancer          | Map3k8 |
| chr10:30794512-30794761  | -28.42 | MAP3K8  | 71686  | + | + | - | No  | intergenic        | Active enhancer          | Map3k8 |
| chr10:30791251-30791951  | -27.43 | MAP3K8  | 68651  | + | + | + | No  | intergenic        | Other                    | Map3k8 |
| chr10:30724018-30724157  | -24.51 | MAP3K8  | 1137   | + | - | + | No  | intronic          | Putative active promoter | Map3k8 |
| chr10:30707701-30707929  | -22.89 | MAP3K8  | -15135 | + | + | - | No  | intergenic        | Active enhancer          | Map3k8 |
| chr10:30709876-30709994  | -22.44 | MAP3K8  | -13015 | + | + | - | No  | intergenic        | Active enhancer          | Map3k8 |
| chr10:30712458-30712588  | -14.12 | MAP3K8  | -10427 | + | + | - | No  | intergenic        | Active enhancer          | Map3k8 |
| chr1:156462193-156462876 | -63.72 | MEF2D   | -2143  | + | + | - | Yes | intergenic        | Active enhancer          | Mef2d  |



|                          |          |        |        |   |   |   |     |                   |                 |        |
|--------------------------|----------|--------|--------|---|---|---|-----|-------------------|-----------------|--------|
| chr1:156458873-156459017 | -22.84   | MEF2D  | 1446   | + | + | - | Yes | intronic          | Active enhancer | Mef2d  |
| chr1:156494953-156495121 | -22.32   | MEF2D  | -24403 | + | + | - | No  | intergenic        | Active enhancer | Mef2d  |
| chr1:156470865-156471050 | -21.47   | MEF2D  | -323   | + | - | + | Yes | promoter          | Active promoter | Mef2d  |
| chr1:156474749-156475037 | -20.44   | MEF2D  | -4259  | + | + | + | Yes | intergenic        | Other           | Mef2d  |
| chr6:109775806-109776946 | -81.28   | MICAL1 | 814    | + | + | + | No  | promoter,intronic | Other           | Mical1 |
| chr6:109780128-109780443 | -24.20   | MICAL1 | -3095  | + | + | - | No  | intergenic        | Active enhancer | Mical1 |
| chr6:109777149-109777252 | -19.43   | MICAL1 | -10    | + | - | + | No  | promoter          | Active promoter | Mical1 |
| chr22:18477480-18477917  | -100.66  | MICAL3 | 29627  | + | + | - | Yes | intronic          | Active enhancer | Mical3 |
| chr22:18479268-18479741  | -64.33   | MICAL3 | 27821  | + | + | - | Yes | intronic          | Active enhancer | Mical3 |
| chr22:18487917-18488523  | -46.86   | MICAL3 | 19105  | + | + | - | Yes | intronic          | Active enhancer | Mical3 |
| chr11:59040177-59041400  | -91.17   | MPEG1  | -60294 | + | + | - | Yes | intergenic        | Active enhancer | Mpeg1  |
| chr11:58984071-58984707  | -85.22   | MPEG1  | -3895  | + | + | - | No  | intergenic        | Active enhancer | Mpeg1  |
| chr11:58980272-58980638  | -46.48   | MPEG1  | 39     | + | + | - | No  | promoter,intronic | Other           | Mpeg1  |
| chr11:59051821-59052171  | -43.21   | MPEG1  | -71502 | + | + | + | Yes | intergenic        | Other           | Mpeg1  |
| chr11:59038720-59039015  | -32.06   | MPEG1  | -58373 | + | + | - | Yes | intergenic        | Active enhancer | Mpeg1  |
| chr11:59039286-59039784  | -31.83   | MPEG1  | -59041 | + | + | - | Yes | intergenic        | Active enhancer | Mpeg1  |
| chr11:58990108-58990428  | -21.18   | MPEG1  | -9774  | + | + | - | No  | intergenic        | Active enhancer | Mpeg1  |
| chr16:134921-135028      | -21.88   | MPG    | 6805   | + | + | - | No  | intronic          | Active enhancer | Mpg    |
| chr6:31708350-31708447   | -15.49   | MSH5   | 673    | + | + | + | No  | promoter,intronic | Other           | Msh5   |
| chr2:42795069-42795496   | -60.00   | MTA3   | 97     | + | + | + | No  | promoter,exonic   | Other           | Mta3   |
| chr2:42794124-42794536   | -56.95   | MTA3   | -855   | + | + | - | No  | promoter          | Other           | Mta3   |
| chr17:27465976-27466337  | -30.38   | MYO18A | 41251  | + | + | + | No  | intronic          | Other           | Myo18a |
| chr17:27467317-27467472  | -14.00   | MYO18A | 40013  | + | + | + | No  | intronic          | Other           | Myo18a |
| chr15:59691614-59692553  | -75.85   | MYO1E  | -27012 | + | + | - | Yes | intergenic        | Active enhancer | Myo1e  |
| chr15:59590169-59590973  | -65.23   | MYO1E  | 74500  | + | + | - | No  | intronic          | Active enhancer | Myo1e  |
| chr15:59592574-59592962  | -52.22   | MYO1E  | 72303  | + | + | - | No  | intronic          | Active enhancer | Myo1e  |
| chr15:59664734-59665523  | -41.93   | MYO1E  | -57    | + | - | + | No  | promoter          | Active promoter | Myo1e  |
| chr15:59687404-59687748  | -28.56   | MYO1E  | -22505 | + | + | - | Yes | intergenic        | Active enhancer | Myo1e  |
| chr12:57481239-57482385  | -34.39   | NAB2   | -865   | + | + | + | No  | promoter          | Other           | Nab2   |
| chr12:57480873-57481064  | -23.18   | NAB2   | -1709  | + | - | + | No  | promoter          | Active promoter | Nab2   |
| chr12:57487577-57487750  | -21.67   | NAB2   | 4986   | + | + | - | No  | intronic          | Active enhancer | Nab2   |
| chr7:74188005-74188522   | -130.93  | NCF1   | -46    | + | + | + | No  | promoter          | Other           | Ncf1   |
| chr7:74178176-74178615   | -113.88  | NCF1   | -9914  | + | + | + | No  | intergenic        | Other           | Ncf1   |
| chr7:74178743-74181047   | -113.88  | NCF1   | -8414  | + | + | + | No  | intergenic        | Other           | Ncf1   |
| chr7:74177699-74177977   | -18.36   | NCF1   | -10471 | + | + | + | No  | intergenic        | Other           | Ncf1   |
| chr22:37256697-37257317  | -1000.00 | NCF4   | -23    | + | + | + | No  | promoter          | Other           | Ncf4   |
| chr22:37258279-37258704  | -70.88   | NCF4   | 1461   | + | + | - | No  | intronic          | Active enhancer | Ncf4   |
| chr17:27055709-27056050  | -89.51   | NEK8   | 47     | + | - | + | No  | promoter,intronic | Active promoter | Nek8   |
| chr17:27054949-27055498  | -29.29   | NEK8   | -609   | + | + | + | No  | promoter          | Other           | Nek8   |
| chr22:42793225-42793569  | -47.56   | NFAM1  | 35004  | + | + | + | No  | intronic          | Other           | Nfam1  |
| chr22:42793004-42793107  | -41.61   | NFAM1  | 35346  | + | + | - | No  | intronic          | Active enhancer | Nfam1  |
| chr20:50031181-50031549  | -63.85   | NFATC2 | 127893 | + | + | - | No  | intronic          | Active enhancer | Nfatc2 |
| chr20:50077433-50077802  | -40.50   | NFATC2 | 81641  | + | + | - | No  | intronic          | Active enhancer | Nfatc2 |
| chr20:50097396-50097580  | -36.23   | NFATC2 | 61770  | + | + | - | No  | intronic          | Active enhancer | Nfatc2 |
| chr20:50097898-50098199  | -36.23   | NFATC2 | 61210  | + | + | - | No  | intronic          | Active enhancer | Nfatc2 |
| chr20:49996972-49997203  | -34.18   | NFATC2 | 162171 | + | + | - | No  | intergenic        | Active enhancer | Nfatc2 |
| chr20:50114150-50114965  | -31.01   | NFATC2 | 44701  | + | + | - | No  | intronic          | Active enhancer | Nfatc2 |
| chr20:50017069-50017301  | -27.52   | NFATC2 | 142073 | + | + | - | No  | intronic          | Active enhancer | Nfatc2 |
| chr20:50142616-50142806  | -26.53   | NFATC2 | 16547  | + | + | - | No  | intronic          | Active enhancer | Nfatc2 |
| chr20:50115082-50115374  | -24.18   | NFATC2 | 44030  | + | + | - | No  | intronic          | Active enhancer | Nfatc2 |
| chr20:50078089-50078208  | -14.13   | NFATC2 | 81110  | + | + | - | No  | intronic          | Active enhancer | Nfatc2 |

|                           |          |         |        |   |   |   |     |                   |                          |         |
|---------------------------|----------|---------|--------|---|---|---|-----|-------------------|--------------------------|---------|
| chr10:104154949-104155218 | -28.98   | NFKB2   | -270   | + | - | + | No  | promoter          | Active promoter          | Nfkb2   |
| chr10:104153811-104154065 | -25.46   | NFKB2   | 71     | + | - | + | No  | promoter,exonic   | Active promoter          | Nfkb2   |
| chr19:36390582-36390890   | -39.31   | NFKBID  | 816    | + | - | + | No  | promoter,intronic | Active promoter          | Nfkbid  |
| chr19:36391423-36391689   | -27.96   | NFKBID  | -4     | + | - | + | No  | promoter          | Active promoter          | Nfkbid  |
| chr6:44231936-44233097    | -63.20   | NFKBIE  | 1009   | + | + | + | No  | intronic          | Other                    | Nfkbie  |
| chr6:44230915-44231522    | -24.32   | NFKBIE  | 2307   | + | + | + | No  | intronic          | Other                    | Nfkbie  |
| chr6:31526494-31527203    | -110.70  | NFKBIL1 | 11495  | + | + | - | No  | intergenic        | Active enhancer          | Nfkbil1 |
| chr8:59571766-59571913    | -20.25   | NSMAF   | 127    | + | - | + | No  | promoter,exonic   | Active promoter          | Nsmaf   |
| chr8:59562377-59562581    | -19.82   | NSMAF   | 9487   | + | + | - | No  | intronic          | Active enhancer          | Nsmaf   |
| chr7:102081984-102083403  | -81.11   | ORAI2   | 8716   | + | + | - | Yes | intronic          | Active enhancer          | Orai2   |
| chr7:102065186-102067350  | -78.20   | ORAI2   | -7709  | + | + | + | Yes | intergenic        | Other                    | Orai2   |
| chr7:102072177-102072554  | -56.52   | ORAI2   | -1612  | + | + | - | Yes | promoter          | Active Enhancer          | Orai2   |
| chr7:102085421-102085824  | -37.56   | ORAI2   | 11645  | + | + | - | Yes | intronic          | Active enhancer          | Orai2   |
| chr7:102056309-102056658  | -26.84   | ORAI2   | -17494 | + | + | - | Yes | intergenic        | Active enhancer          | Orai2   |
| chr7:102071330-102071526  | -23.88   | ORAI2   | -2549  | + | + | - | Yes | intergenic        | Active enhancer          | Orai2   |
| chr7:102061539-102061718  | -22.57   | ORAI2   | -12349 | + | + | - | Yes | intergenic        | Active enhancer          | Orai2   |
| chr7:102074398-102074498  | -19.28   | ORAI2   | 471    | + | - | + | Yes | promoter,intronic | Active promoter          | Orai2   |
| chr7:102073303-102073401  | -16.28   | ORAI2   | -625   | + | + | - | Yes | promoter          | Active Enhancer          | Orai2   |
| chr1:17467915-17468329    | -24.68   | PADI2   | -22174 | + | + | + | No  | intergenic        | Other                    | Padi2   |
| chr1:226556707-226557218  | -133.51  | PARP1   | 38839  | + | + | - | Yes | intronic          | Active enhancer          | Parp1   |
| chr1:226558230-226559201  | -63.74   | PARP1   | 37086  | + | + | + | Yes | intronic          | Other                    | Parp1   |
| chr1:226624563-226625114  | -53.97   | PARP1   | -29037 | + | + | - | No  | intergenic        | Active enhancer          | Parp1   |
| chr1:226594030-226594573  | -30.83   | PARP1   | 1500   | + | - | + | No  | intronic          | Putative active promoter | Parp1   |
| chr1:226593251-226593461  | -28.62   | PARP1   | 2445   | + | + | + | No  | intronic          | Other                    | Parp1   |
| chr1:226632708-226632962  | -27.42   | PARP1   | -37034 | + | + | - | No  | intergenic        | Active enhancer          | Parp1   |
| chr1:226595145-226595333  | -22.29   | PARP1   | 562    | + | - | + | No  | promoter,intronic | Active promoter          | Parp1   |
| chr22:44578473-44578714   | -38.62   | PARVG   | 1823   | + | + | + | No  | intronic          | Other                    | Parvg   |
| chr22:44577494-44577788   | -21.45   | PARVG   | 871    | + | - | + | No  | promoter,exonic   | Active promoter          | Parvg   |
| chr8:22437484-22438147    | -121.67  | PDLIM2  | -172   | + | + | + | No  | promoter          | Other                    | Pdlim2  |
| chr21:45144807-45145059   | -23.19   | PDXK    | 5955   | + | + | - | No  | intronic          | Active enhancer          | Pdxk    |
| chr1:160173707-160174940  | -1000.00 | PEA15   | -786   | + | + | + | No  | promoter          | Other                    | Pea15a  |
| chr1:160176513-160176802  | -40.00   | PEA15   | 1548   | + | + | - | No  | intronic          | Active enhancer          | Pea15a  |
| chr17:8042022-8042283     | -38.57   | PER1    | 13601  | + | - | - | No  | intergenic        | Other                    | Per1    |
| chr14:105391021-105391418 | -61.21   | PLD4    | 32     | + | + | - | No  | promoter,exonic   | Other                    | Pld4    |
| chr2:208848336-208848673  | -52.02   | PLEKHM3 | 41780  | + | + | - | No  | intronic          | Active enhancer          | Plekhm3 |
| chr6:30650246-30651501    | -96.72   | PPP1R18 | 4220   | + | + | + | No  | intronic          | Other                    | Ppp1r18 |
| chr6:30654672-30655645    | -66.18   | PPP1R18 | -65    | + | + | + | No  | promoter          | Other                    | Ppp1r18 |
| chr6:30655970-30655996    | -66.18   | PPP1R18 | -311   | + | + | - | No  | promoter          | Other                    | Ppp1r18 |
| chr6:30653307-30654339    | -46.10   | PPP1R18 | 1270   | + | + | + | No  | exonic            | Other                    | Ppp1r18 |
| chr6:30656200-30656752    | -33.74   | PPP1R18 | -804   | + | + | - | No  | promoter          | Other                    | Ppp1r18 |
| chr6:30652537-30653013    | -26.82   | PPP1R18 | 2318   | + | + | + | No  | exonic            | Other                    | Ppp1r18 |
| chr6:30651901-30652058    | -16.09   | PPP1R18 | 3114   | + | + | + | No  | intronic          | Other                    | Ppp1r18 |
| chr6:106545294-106545900  | -23.93   | PRDM1** | -1140  | + | + | + | No  | promoter          | Poised promoter          | Prdm1   |
| chr19:47221489-47222876   | -72.75   | PRKD2   | -1798  | + | + | - | No  | promoter          | Putative enhancer        | Prkd2   |
| chr19:47217829-47217991   | -21.57   | PRKD2   | -333   | + | + | + | No  | promoter          | Other                    | Prkd2   |
| chr5:139126713-139127298  | -31.26   | PSD2    | -48401 | + | + | + | No  | intergenic        | Other                    | Psd2    |
| chr8:142412745-142413140  | -44.31   | PTP4A3  | -18546 | + | + | - | No  | intergenic        | Active enhancer          | Ptp4a3  |
| chr19:5276796-5277134     | -32.48   | PTPRS   | 63849  | + | + | - | No  | intronic          | Active enhancer          | Ptprs   |
| chr3:58335213-58336072    | -61.43   | PXK     | 17025  | + | + | - | Yes | intronic          | Active enhancer          | Pxk     |
| chr3:58324216-58324601    | -35.00   | PXK     | 5791   | + | + | - | Yes | intronic          | Active enhancer          | Pxk     |
| chr3:58340963-58341212    | -28.13   | PXK     | 22470  | + | + | - | Yes | intronic          | Active enhancer          | Pxk     |

|                           |          |        |        |   |   |   |     |                   |                 |        |
|---------------------------|----------|--------|--------|---|---|---|-----|-------------------|-----------------|--------|
| chr3:58323577-58323720    | -18.45   | PXK    | 5031   | + | + | - | Yes | intronic          | Active enhancer | Pxk    |
| chr3:58341939-58342108    | -17.15   | PXK    | 23406  | + | + | - | Yes | intronic          | Active enhancer | Pxk    |
| chr11:82774139-82775352   | -43.95   | RAB30  | 7759   | + | + | + | Yes | intronic          | Other           | Rab30  |
| chr11:82773736-82774014   | -37.46   | RAB30  | 8629   | + | + | - | Yes | intronic          | Active enhancer | Rab30  |
| chr11:82777587-82777765   | -19.73   | RAB30  | 4828   | + | + | - | Yes | intronic          | Active enhancer | Rab30  |
| chr18:9673410-9673655     | -32.45   | RAB31  | -34696 | + | - | - | No  | intergenic        | Other           | Rab31  |
| chr17:72738417-72738665   | -28.16   | RAB37  | 5185   | + | + | - | No  | intronic          | Active enhancer | Rab37  |
| chr19:41283051-41284303   | -1000.00 | RAB4B  | -447   | + | + | + | No  | promoter          | Other           | Rab4b  |
| chr20:4803122-4803588     | -114.61  | RASSF2 | 936    | + | - | + | No  | promoter,intronic | Active promoter | Rassf2 |
| chr20:4792280-4792913     | -69.38   | RASSF2 | 3173   | + | + | - | Yes | intronic          | Active enhancer | Rassf2 |
| chr20:4793104-4795827     | -69.38   | RASSF2 | 1304   | + | + | + | Yes | intronic          | Other           | Rassf2 |
| chr20:4822697-4822854     | -31.65   | RASSF2 | -18484 | + | + | - | No  | intergenic        | Active enhancer | Rassf2 |
| chr20:4821738-4821867     | -19.95   | RASSF2 | -17511 | + | + | - | No  | intergenic        | Active enhancer | Rassf2 |
| chr20:4821484-4821630     | -17.97   | RASSF2 | -17266 | + | + | - | No  | intergenic        | Active enhancer | Rassf2 |
| chr17:73682500-73682878   | -45.42   | RECQL5 | -19420 | + | + | - | No  | intergenic        | Active enhancer | Recql5 |
| chr17:73685572-73685970   | -43.84   | RECQL5 | -22502 | + | + | - | No  | intergenic        | Active enhancer | Recql5 |
| chr17:73685000-73685222   | -26.77   | RECQL5 | -21842 | + | + | - | No  | intergenic        | Active enhancer | Recql5 |
| chr19:45519549-45520122   | -82.49   | RELB   | 15128  | + | + | - | No  | intronic          | Active enhancer | Relb   |
| chr14:23357849-23358196   | -31.65   | REM2   | 5590   | + | + | - | No  | intergenic        | Active enhancer | Rem2   |
| chr14:23357232-23357628   | -31.25   | REM2   | 4998   | + | + | - | No  | intergenic        | Active enhancer | Rem2   |
| chr14:23356530-23356777   | -24.02   | REM2   | 4221   | + | + | + | No  | exonic            | Other           | Rem2   |
| chr1:192595653-192596032  | -49.67   | RGS13  | -9426  | + | + | - | Yes | intergenic        | Active enhancer | Rgs13  |
| chr1:192608686-192608873  | -24.18   | RGS13  | 3511   | + | + | - | Yes | intronic          | Active enhancer | Rgs13  |
| chr1:192578323-192578479  | -21.73   | RGS13  | -26867 | + | + | - | No  | intergenic        | Active enhancer | Rgs13  |
| chr9:116285683-116286415  | -61.59   | RGS3   | -12708 | + | + | + | No  | intergenic        | Other           | Rgs3   |
| chr9:116342842-116343315  | -56.07   | RGS3   | -79    | + | + | + | No  | promoter          | Other           | Rgs3   |
| chr9:116344150-116344479  | -54.72   | RGS3   | 1157   | + | + | + | No  | intronic          | Other           | Rgs3   |
| chr9:116341234-116342002  | -27.08   | RGS3   | -1539  | + | + | + | No  | promoter          | Other           | Rgs3   |
| chr9:116279536-116279678  | -17.02   | RGS3   | 15900  | + | + | + | No  | intronic          | Other           | Rgs3   |
| chr17:63096212-63096673   | -41.32   | RGS9   | -37014 | + | + | + | No  | intergenic        | Other           | Rgs9   |
| chr17:63177372-63177547   | -32.37   | RGS9   | 44003  | + | + | - | No  | intronic          | Active enhancer | Rgs9   |
| chr17:63151012-63151243   | -26.34   | RGS9   | 17671  | + | + | - | No  | intronic          | Active enhancer | Rgs9   |
| chr12:122227201-122228095 | -41.04   | RHOF   | 3946   | + | + | - | No  | intronic          | Active enhancer | Rhof   |
| chr8:33411564-33412761    | -73.20   | RNF122 | 12484  | + | + | - | No  | intronic          | Active enhancer | Rnf122 |
| chr17:4843376-4844365     | -28.97   | RNF167 | 240    | + | + | + | No  | promoter,exonic   | Other           | Rnf167 |
| chr21:15929705-15930114   | -46.29   | SAMSN1 | -11228 | + | + | - | No  | intergenic        | Active enhancer | Samsn1 |
| chr3:42653745-42654076    | -29.62   | SEC22C | -11338 | + | + | - | No  | intergenic        | Active enhancer | Sec22c |
| chr12:109027403-109027811 | -65.42   | SELPLG | 63     | + | + | - | No  | promoter,exonic   | Poised promoter | Selplg |
| chr12:109028939-109029766 | -49.45   | SELPLG | -1682  | + | + | - | No  | promoter          | Poised promoter | Selplg |
| chr12:109028371-109028543 | -20.17   | SELPLG | -787   | + | + | - | No  | promoter          | Poised promoter | Selplg |
| chr15:74695164-74697055   | -1000.00 | SEMA7A | 29892  | + | + | + | Yes | intergenic        | Other           | Sema7a |
| chr15:74721292-74721817   | -58.83   | SEMA7A | 4447   | + | + | - | No  | intronic          | Active enhancer | Sema7a |
| chr9:130541542-130541893  | -30.07   | SH2D3C | -669   | + | + | - | No  | promoter          | Other           | Sh2d3c |
| chr9:130538703-130538912  | -28.19   | SH2D3C | 2241   | + | + | + | No  | intronic          | Other           | Sh2d3c |
| chr9:130540966-130541100  | -21.23   | SH2D3C | 15     | + | + | + | No  | promoter,exonic   | Other           | Sh2d3c |
| chr4:2813664-2814199      | -120.82  | SH3BP2 | -15    | + | + | + | No  | promoter          | Other           | Sh3bp2 |
| chr3:48514369-48514709    | -41.34   | SHISA5 | 203    | + | - | + | No  | promoter,exonic   | Active promoter | Shisa5 |
| chr9:35635896-35636565    | -68.41   | SIT1   | 14717  | + | + | - | No  | intergenic        | Active enhancer | Sit1   |
| chr9:35634537-35635687    | -65.90   | SIT1   | 15835  | + | + | + | No  | intergenic        | Other           | Sit1   |
| chr9:35646967-35647661    | -62.80   | SIT1   | 3633   | + | + | + | No  | intergenic        | Other           | Sit1   |
| chr9:35649307-35649800    | -55.88   | SIT1   | 1394   | + | + | + | No  | exonic            | Other           | Sit1   |

|                          |          |          |         |   |   |   |     |                   |                 |          |
|--------------------------|----------|----------|---------|---|---|---|-----|-------------------|-----------------|----------|
| chr7:26903280-26903447   | -28.95   | SKAP2    | 978     | + | - | + | No  | promoter,intronic | Active promoter | Skap2    |
| chr7:26904015-26904612   | -28.27   | SKAP2    | 28      | + | - | + | No  | promoter,exonic   | Active promoter | Skap2    |
| chr1:160623376-160623870 | -47.27   | SLAMF1   | -6522   | + | + | - | Yes | intergenic        | Active enhancer | Slamf1   |
| chr1:160634465-160634868 | -43.73   | SLAMF1   | -17565  | + | + | - | Yes | intergenic        | Active enhancer | Slamf1   |
| chr1:160594264-160594594 | -40.77   | SLAMF1   | 22672   | + | + | - | Yes | intronic          | Active enhancer | Slamf1   |
| chr1:160616442-160617137 | -34.13   | SLAMF1   | 312     | + | + | + | Yes | promoter,exonic   | Other           | Slamf1   |
| chr1:160611317-160611506 | -20.61   | SLAMF1   | 5690    | + | + | - | Yes | intronic          | Active enhancer | Slamf1   |
| chr1:160595770-160595873 | -16.89   | SLAMF1   | 21280   | + | + | - | Yes | intronic          | Active enhancer | Slamf1   |
| chr3:124866061-124866345 | -34.05   | SLC12A8  | 64040   | + | + | - | No  | intronic          | Active enhancer | Slc12a8  |
| chr3:124866482-124866637 | -34.05   | SLC12A8  | 63684   | + | + | - | No  | intronic          | Active enhancer | Slc12a8  |
| chr3:124864974-124865188 | -28.39   | SLC12A8  | 65162   | + | + | - | No  | intronic          | Active enhancer | Slc12a8  |
| chr3:124873933-124874101 | -20.73   | SLC12A8  | 56226   | + | + | + | No  | intronic          | Other           | Slc12a8  |
| chr9:130834898-130835103 | -15.40   | SLC25A25 | 4521    | + | + | - | No  | intronic          | Active enhancer | Slc25a25 |
| chr9:136343713-136343860 | -16.58   | SLC2A6   | 490     | + | + | + | No  | promoter,intronic | Other           | Slc2a6   |
| chr17:1496106-1496750    | -63.62   | SLC43A2  | 11900   | + | + | - | No  | intronic          | Active enhancer | Slc43a2  |
| chr17:1530460-1530841    | -48.36   | SLC43A2  | 1019    | + | + | - | No  | intronic          | Active enhancer | Slc43a2  |
| chr8:142192120-142192938 | -108.99  | SLC45A4  | 46144   | + | + | - | Yes | intergenic        | Active enhancer | Slc45a4  |
| chr8:142188641-142189393 | -80.32   | SLC45A4  | 49656   | + | + | - | Yes | intergenic        | Active enhancer | Slc45a4  |
| chr8:142216472-142216946 | -39.14   | SLC45A4  | 21964   | + | + | + | No  | intergenic        | Other           | Slc45a4  |
| chr12:51762617-51763175  | -109.89  | SLC4A8   | -22205  | + | + | - | No  | intergenic        | Active enhancer | Slc4a8   |
| chr14:23272577-23272721  | -30.36   | SLC7A7   | 12452   | + | + | - | No  | intronic          | Active enhancer | Slc7a7   |
| chr22:24142458-24143762  | -1000.00 | SMARCB1  | 13960   | + | + | - | No  | intronic          | Active enhancer | Smarcb1  |
| chr22:24141174-24141647  | -50.41   | SMARCB1  | 12260   | + | + | - | No  | intronic          | Active enhancer | Smarcb1  |
| chr16:12127606-12128487  | -98.53   | SNX29    | 57455   | + | + | - | No  | intronic          | Active enhancer | Snx29    |
| chr16:12128831-12129243  | -30.34   | SNX29    | 58446   | + | + | - | No  | intronic          | Active enhancer | Snx29    |
| chr16:12241592-12241799  | -25.03   | SNX29    | 171104  | + | + | - | No  | intronic          | Active enhancer | Snx29    |
| chr16:12139852-12140053  | -22.76   | SNX29    | 69361   | + | + | + | No  | intronic          | Other           | Snx29    |
| chr7:2339428-2339943     | -90.55   | SNX8     | 14425   | + | + | - | Yes | intronic          | Active enhancer | Snx8     |
| chr7:2347352-2347773     | -42.63   | SNX8     | 6548    | + | + | + | Yes | intronic          | Other           | Snx8     |
| chr7:2338769-2339179     | -40.01   | SNX8     | 15136   | + | + | - | Yes | intronic          | Active enhancer | Snx8     |
| chr7:2353465-2353623     | -27.50   | SNX8     | 566     | + | - | + | Yes | promoter,intronic | Active promoter | Snx8     |
| chr2:214543452-214543975 | -56.80   | SPAG16   | 394610  | + | - | - | No  | intronic          | Other           | Spag16   |
| chr2:214616162-214616439 | -23.58   | SPAG16   | 467197  | + | + | - | No  | intronic          | Active enhancer | Spag16   |
| chr13:24848613-24848917  | -25.40   | SPATA13  | 3940    | + | + | - | No  | intronic          | Active enhancer | Spata13  |
| chr20:55891570-55892256  | -75.52   | SPO11    | -12918  | + | - | - | No  | intergenic        | Other           | Spo11    |
| chr20:55892899-55893346  | -24.92   | SPO11    | -11709  | + | + | - | No  | intergenic        | Active enhancer | Spo11    |
| chr22:42258131-42259078  | -34.31   | SREBF2   | 29521   | + | + | - | Yes | intronic          | Active enhancer | Srebf2   |
| chr22:42255220-42255410  | -29.41   | SREBF2   | 26232   | + | + | - | Yes | intronic          | Active enhancer | Srebf2   |
| chr16:70466418-70467125  | -1000.00 | ST3GAL2  | 6220    | + | + | - | Yes | intronic          | Active enhancer | St3gal2  |
| chr16:70463833-70466136  | -70.57   | ST3GAL2  | 8007    | + | + | - | Yes | intronic          | Active enhancer | St3gal2  |
| chr16:70438252-70438578  | -44.54   | ST3GAL2  | 34576   | + | + | - | Yes | intronic          | Active enhancer | St3gal2  |
| chr2:197040786-197041287 | -96.36   | STK17B   | -4700   | + | + | + | Yes | intergenic        | Other           | Stk17b   |
| chr2:197139137-197139811 | -84.47   | STK17B   | -103138 | + | + | - | Yes | intergenic        | Active enhancer | Stk17b   |
| chr2:197104853-197105280 | -74.83   | STK17B   | -68730  | + | + | - | Yes | intergenic        | Active enhancer | Stk17b   |
| chr2:197133299-197133909 | -55.62   | STK17B   | -97268  | + | + | - | Yes | intergenic        | Active enhancer | Stk17b   |
| chr2:197024863-197025174 | -53.73   | STK17B   | 11318   | + | + | - | Yes | intronic          | Active enhancer | Stk17b   |
| chr2:197134022-197134155 | -46.17   | STK17B   | -97752  | + | + | + | Yes | intergenic        | Other           | Stk17b   |
| chr2:197040215-197040557 | -40.36   | STK17B   | -4050   | + | + | + | Yes | intergenic        | Other           | Stk17b   |
| chr2:197041583-197042047 | -37.46   | STK17B   | -5479   | + | + | + | Yes | intergenic        | Other           | Stk17b   |
| chr2:197106808-197107371 | -34.63   | STK17B   | -70753  | + | + | + | Yes | intergenic        | Other           | Stk17b   |
| chr2:197075996-197076310 | -34.28   | STK17B   | -39817  | + | + | + | No  | intergenic        | Other           | Stk17b   |

|                          |          |          |         |   |   |   |     |                   |                 |          |
|--------------------------|----------|----------|---------|---|---|---|-----|-------------------|-----------------|----------|
| chr2:197127876-197128261 | -31.83   | STK17B   | -91732  | + | + | - | Yes | intergenic        | Active enhancer | Stk17b   |
| chr2:197132740-197133019 | -31.68   | STK17B   | -96543  | + | + | - | Yes | intergenic        | Active enhancer | Stk17b   |
| chr2:197098580-197098861 | -28.32   | STK17B   | -62384  | + | + | - | Yes | intergenic        | Active enhancer | Stk17b   |
| chr2:197140370-197140569 | -24.66   | STK17B   | -104133 | + | + | - | Yes | intergenic        | Active enhancer | Stk17b   |
| chr2:197042583-197042708 | -19.81   | STK17B   | -6309   | + | + | - | Yes | intergenic        | Active enhancer | Stk17b   |
| chr2:197125444-197125516 | -16.20   | STK17B   | -89144  | + | + | - | Yes | intergenic        | Active enhancer | Stk17b   |
| chr17:61819044-61819597  | -28.69   | STRADA   | 10      | + | + | + | No  | promoter,exonic   | Other           | Strada   |
| chr17:61819723-61819956  | -28.41   | STRADA   | -509    | + | - | + | No  | promoter          | Active promoter | Strada   |
| chr3:31268743-31268955   | -45.76   | STT3B    | -305144 | + | + | - | No  | intergenic        | Active enhancer | Stt3b    |
| chr3:31267840-31268302   | -45.35   | STT3B    | -305922 | + | + | - | No  | intergenic        | Active enhancer | Stt3b    |
| chr3:31574260-31574460   | -26.92   | STT3B    | 367     | + | - | + | No  | promoter,exonic   | Active promoter | Stt3b    |
| chr6:144471884-144472025 | -20.69   | STX11    | 300     | + | - | + | No  | promoter,intronic | Active promoter | Stx11    |
| chr9:114867191-114867577 | -67.38   | SUSD1    | 70193   | + | + | - | No  | intronic          | Active enhancer | Susd1    |
| chr9:114799929-114800565 | -34.83   | SUSD1    | 137330  | + | + | - | Yes | intergenic        | Active enhancer | Susd1    |
| chr9:114798112-114798721 | -31.87   | SUSD1    | 139161  | + | + | - | Yes | intergenic        | Active enhancer | Susd1    |
| chr9:95823903-95824897   | -64.16   | SUSD3    | 3430    | + | + | + | No  | intronic          | Other           | Susd3    |
| chr9:95820535-95820826   | -40.67   | SUSD3    | -290    | + | + | - | No  | promoter          | Other           | Susd3    |
| chr9:95826622-95826907   | -31.79   | SUSD3    | 5794    | + | + | - | No  | intronic          | Active enhancer | Susd3    |
| chr9:95821822-95822072   | -21.88   | SUSD3    | 977     | + | + | + | No  | promoter,intronic | Other           | Susd3    |
| chr6:152623068-152623566 | -42.05   | SYNE1    | 334669  | + | - | + | No  | intronic          | Other           | Syne1    |
| chr6:159136888-159137308 | -32.65   | SYTL3    | 66052   | + | + | - | No  | intronic          | Active enhancer | Sytl3    |
| chr2:161993308-161993509 | -27.51   | TANK     | -58     | + | - | + | No  | promoter          | Active promoter | Tank     |
| chr2:161947061-161947150 | -25.34   | TANK     | -46361  | + | + | + | No  | intergenic        | Other           | Tank     |
| chr2:162027441-162027563 | -24.91   | TANK     | 10563   | + | + | - | No  | intronic          | Active enhancer | Tank     |
| chr2:162016883-162017021 | -23.22   | TANK     | 13      | + | - | + | No  | promoter,exonic   | Active promoter | Tank     |
| chr2:161945278-161945453 | -19.16   | TANK     | -48101  | + | + | - | No  | intergenic        | Active enhancer | Tank     |
| chr2:161960888-161961050 | -17.52   | TANK     | -32497  | + | + | + | No  | intergenic        | Other           | Tank     |
| chr22:47169144-47170973  | -1000.00 | TBC1D22A | 234     | + | + | - | Yes | promoter,exonic   | Active Enhancer | Tbc1d22a |
| chr22:47166564-47167010  | -78.75   | TBC1D22A | -3037   | + | + | - | Yes | intergenic        | Active enhancer | Tbc1d22a |
| chr22:47165127-47165525  | -61.26   | TBC1D22A | -4498   | + | + | - | Yes | intergenic        | Active enhancer | Tbc1d22a |
| chr22:47158994-47159352  | -61.03   | TBC1D22A | -466    | + | - | + | No  | promoter          | Active promoter | Tbc1d22a |
| chr22:47158524-47158672  | -24.88   | TBC1D22A | 84      | + | - | + | No  | promoter,exonic   | Active promoter | Tbc1d22a |
| chr22:47164508-47164646  | -21.27   | TBC1D22A | 4938    | + | + | - | Yes | intronic          | Active enhancer | Tbc1d22a |
| chr22:47171243-47171380  | -14.98   | TBC1D22A | 1487    | + | + | - | Yes | intronic          | Active enhancer | Tbc1d22a |
| chr12:55378351-55378783  | -50.91   | TESPA1   | -37     | + | - | + | No  | promoter          | Active promoter | Tespa1   |
| chr12:55385280-55385505  | -18.65   | TESPA1   | -6862   | + | + | - | No  | intergenic        | Active enhancer | Tespa1   |
| chr14:76426670-76426784  | -18.45   | TGFB3    | 21638   | + | + | - | No  | intronic          | Active enhancer | Tgfb3    |
| chr3:30686200-30686609   | -72.62   | TGFBR2   | 38410   | + | + | - | Yes | exonic            | Active enhancer | Tgfr2    |
| chr3:30685611-30686031   | -72.17   | TGFBR2   | 37827   | + | + | - | Yes | intronic          | Active enhancer | Tgfr2    |
| chr3:30684300-30684781   | -59.99   | TGFBR2   | 36546   | + | + | - | Yes | intronic          | Active enhancer | Tgfr2    |
| chr3:30691056-30691418   | -53.64   | TGFBR2   | 43243   | + | + | - | Yes | intronic          | Active enhancer | Tgfr2    |
| chr3:30645629-30645885   | -32.05   | TGFBR2   | -2237   | + | + | - | Yes | intergenic        | Active enhancer | Tgfr2    |
| chr3:30647948-30648154   | -28.53   | TGFBR2   | 57      | + | + | + | Yes | promoter,exonic   | Other           | Tgfr2    |
| chr3:30690502-30690745   | -26.65   | TGFBR2   | 42629   | + | + | - | Yes | intronic          | Active enhancer | Tgfr2    |
| chr3:30648644-30648920   | -23.04   | TGFBR2   | 788     | + | - | + | Yes | promoter,intronic | Active promoter | Tgfr2    |
| chr20:36825661-36825813  | -30.72   | TGM2     | -32037  | + | + | - | No  | intergenic        | Active enhancer | Tgm2     |
| chr20:36825942-36826028  | -30.72   | TGM2     | -32285  | + | + | - | No  | intergenic        | Active enhancer | Tgm2     |
| chrX:153562181-153562443 | -36.82   | TKTL1    | 28903   | + | + | - | No  | intergenic        | Active enhancer | Tktl1    |
| chr11:60683076-60683310  | -23.67   | TMEM109  | 1822    | + | + | + | No  | intronic          | Other           | Tmem109  |
| chr11:60677856-60678060  | -21.63   | TMEM109  | -3413   | + | + | - | No  | intergenic        | Active enhancer | Tmem109  |
| chr6:138188562-138188917 | -31.74   | TNFAIP3  | 414     | + | - | + | No  | promoter,intronic | Active promoter | Tnfaip3  |

|                          |         |           |         |   |   |   |     |                   |                 |           |
|--------------------------|---------|-----------|---------|---|---|---|-----|-------------------|-----------------|-----------|
| chr6:138075614-138075830 | -29.24  | TNFAIP3   | -112603 | + | + | - | No  | intergenic        | Active enhancer | Tnfaip3   |
| chr19:4639025-4639220    | -27.76  | TNFAIP8L1 | -405    | + | + | - | No  | promoter          | Poised promoter | Tnfaip8l1 |
| chr7:47614300-47614622   | -52.56  | TNS3      | 7281    | + | + | - | No  | intronic          | Active enhancer | Tns3      |
| chr7:47188984-47189456   | -39.52  | TNS3      | 432522  | + | + | - | No  | intergenic        | Active enhancer | Tns3      |
| chr7:47640556-47641185   | -28.25  | TNS3      | -19128  | + | + | - | No  | intergenic        | Active enhancer | Tns3      |
| chr8:81050800-81051219   | -59.82  | TPD52     | 32426   | + | + | + | Yes | intronic          | Other           | Tpd52     |
| chr8:81074253-81074609   | -43.60  | TPD52     | 9004    | + | + | - | Yes | intronic          | Active enhancer | Tpd52     |
| chr8:81082571-81083533   | -37.69  | TPD52     | 383     | + | + | + | Yes | promoter,intronic | Other           | Tpd52     |
| chr8:81058781-81059619   | -32.70  | TPD52     | 24235   | + | + | - | Yes | intronic          | Active enhancer | Tpd52     |
| chr8:81079584-81079860   | -26.85  | TPD52     | 3713    | + | + | - | Yes | intronic          | Active enhancer | Tpd52     |
| chr8:81055659-81055786   | -21.53  | TPD52     | 27713   | + | + | - | Yes | intronic          | Active enhancer | Tpd52     |
| chr7:144531991-144532675 | -23.54  | TPK1      | 813     | + | - | + | No  | promoter,intronic | Active promoter | Tpk1      |
| chr7:144522377-144522686 | -22.73  | TPK1      | 10615   | + | + | + | No  | intronic          | Other           | Tpk1      |
| chr9:123698157-123699055 | -93.14  | TRAF1     | -7155   | + | + | - | Yes | intergenic        | Active enhancer | Traf1     |
| chr9:123706677-123707059 | -84.52  | TRAF1     | -15417  | + | + | - | Yes | intergenic        | Active enhancer | Traf1     |
| chr9:123693801-123694419 | -57.87  | TRAF1     | -2659   | + | + | - | Yes | intergenic        | Active enhancer | Traf1     |
| chr9:123667638-123668069 | -48.18  | TRAF1     | 8997    | + | + | - | Yes | intergenic        | Active enhancer | Traf1     |
| chr9:123696680-123696949 | -25.46  | TRAF1     | -5363   | + | + | - | Yes | intergenic        | Active enhancer | Traf1     |
| chr9:123691083-123691517 | -25.32  | TRAF1     | 151     | + | + | + | Yes | promoter,intronic | Other           | Traf1     |
| chr9:123697610-123697906 | -24.16  | TRAF1     | -6307   | + | + | - | Yes | intergenic        | Active enhancer | Traf1     |
| chr9:123688697-123689078 | -23.29  | TRAF1     | 286     | + | + | + | Yes | promoter,exonic   | Other           | Traf1     |
| chr9:123690693-123690904 | -22.99  | TRAF1     | 653     | + | + | + | Yes | promoter,intronic | Other           | Traf1     |
| chr9:123697376-123697381 | -19.12  | TRAF1     | -5927   | + | + | - | Yes | intergenic        | Active enhancer | Traf1     |
| chr9:100866173-100866321 | -36.42  | TRIM14    | 15388   | + | + | - | Yes | intronic          | Active enhancer | Trim14    |
| chr9:100866759-100867032 | -35.84  | TRIM14    | 14740   | + | + | - | Yes | intronic          | Active enhancer | Trim14    |
| chr9:100870287-100870579 | -33.23  | TRIM14    | 11202   | + | + | - | Yes | intronic          | Active enhancer | Trim14    |
| chr9:100870790-100871212 | -33.23  | TRIM14    | 10634   | + | + | - | Yes | intronic          | Active enhancer | Trim14    |
| chr9:100871386-100871659 | -33.23  | TRIM14    | 10113   | + | + | - | Yes | intronic          | Active enhancer | Trim14    |
| chr9:100864252-100864500 | -32.32  | TRIM14    | 17259   | + | + | - | Yes | intronic          | Active enhancer | Trim14    |
| chr9:100881602-100881770 | -19.61  | TRIM14    | -51     | + | + | + | Yes | promoter          | Other           | Trim14    |
| chr15:45020878-45021340  | -40.89  | TRIM69    | -7451   | + | + | + | No  | intergenic        | Other           | Trim69    |
| chr15:45018805-45019133  | -39.81  | TRIM69    | -9591   | + | + | + | No  | intergenic        | Other           | Trim69    |
| chr15:45016759-45017036  | -22.74  | TRIM69    | -11663  | + | + | - | No  | intergenic        | Active enhancer | Trim69    |
| chr5:180616680-180616831 | -15.25  | TRIM7     | 11175   | + | - | + | No  | intergenic        | Other           | Trim7     |
| chr5:180617651-180617766 | -14.17  | TRIM7     | 10222   | + | - | + | No  | intergenic        | Other           | Trim7     |
| chr5:14287077-14287451   | -38.00  | TRIO      | 143435  | + | + | - | No  | intronic          | Active enhancer | Trio      |
| chr5:14277634-14277922   | -34.79  | TRIO      | 133949  | + | + | - | No  | intronic          | Active enhancer | Trio      |
| chr5:14212324-14212721   | -28.99  | TRIO      | 68693   | + | + | - | No  | intronic          | Active enhancer | Trio      |
| chr5:14155292-14155459   | -19.63  | TRIO      | 11546   | + | + | - | No  | intronic          | Active enhancer | Trio      |
| chr16:10884932-10885310  | -47.47  | TVP23A    | 27500   | + | + | - | No  | intronic          | Active enhancer | Tvp23a    |
| chr16:10906209-10906581  | -31.26  | TVP23A    | 6226    | + | + | - | No  | intronic          | Active enhancer | Tvp23a    |
| chr16:10906772-10907052  | -31.26  | TVP23A    | 5709    | + | + | - | No  | intronic          | Active enhancer | Tvp23a    |
| chr16:10896538-10896695  | -29.23  | TVP23A    | 16005   | + | + | - | No  | intronic          | Active enhancer | Tvp23a    |
| chr16:10898613-10898789  | -18.46  | TVP23A    | 13920   | + | + | - | No  | intronic          | Active enhancer | Tvp23a    |
| chr16:10900704-10900831  | -17.09  | TVP23A    | 11854   | + | + | - | No  | intronic          | Active enhancer | Tvp23a    |
| chr1:26645150-26645410   | -36.49  | UBXN11    | -524    | + | + | + | No  | promoter          | Other           | Ubxn11    |
| chr11:67770832-67771158  | -66.16  | UNC93B1   | 600     | + | - | + | No  | promoter,intronic | Active promoter | Unc93b1   |
| chr11:67770134-67770731  | -66.16  | UNC93B1   | 1163    | + | + | + | No  | intronic          | Other           | Unc93b1   |
| chr19:17302594-17303069  | -46.48  | USE1      | -23324  | + | + | - | No  | intergenic        | Active enhancer | Use1      |
| chr19:17294622-17295210  | -33.42  | USE1      | -31239  | + | + | - | No  | intergenic        | Active enhancer | Use1      |
| chr7:55600957-55601723   | -106.71 | VOPP1     | 4069    | + | + | - | Yes | intronic          | Active enhancer | Vopp1     |

|                         |         |         |        |   |   |   |     |                   |                 |         |
|-------------------------|---------|---------|--------|---|---|---|-----|-------------------|-----------------|---------|
| chr7:55601935-55603344  | -106.71 | VOPP1   | 2770   | + | + | - | Yes | intronic          | Active enhancer | Vopp1   |
| chr7:55638822-55639550  | -38.79  | VOPP1   | 1014   | + | + | + | Yes | intronic          | Other           | Vopp1   |
| chr7:55583628-55583876  | -30.31  | VOPP1   | 21657  | + | + | - | Yes | intronic          | Active enhancer | Vopp1   |
| chr7:55637067-55637349  | -30.20  | VOPP1   | 2992   | + | + | - | Yes | intronic          | Active enhancer | Vopp1   |
| chr7:55637546-55637790  | -30.20  | VOPP1   | 2532   | + | + | - | Yes | intronic          | Active enhancer | Vopp1   |
| chr7:55635291-55635478  | -29.27  | VOPP1   | 4816   | + | + | - | Yes | intronic          | Active enhancer | Vopp1   |
| chr7:55625356-55625734  | -28.08  | VOPP1   | -5079  | + | + | - | Yes | intergenic        | Active enhancer | Vopp1   |
| chr7:55638119-55638275  | -17.91  | VOPP1   | 2003   | + | + | + | Yes | intronic          | Other           | Vopp1   |
| chr10:49892476-49893747 | -66.93  | WDFY4   | -407   | + | + | + | No  | promoter          | Other           | Wdfy4   |
| chr10:49879410-49880044 | -45.94  | WDFY4   | -13791 | + | + | + | Yes | intergenic        | Other           | Wdfy4   |
| chr10:49880355-49880845 | -37.29  | WDFY4   | -12918 | + | + | + | Yes | intergenic        | Other           | Wdfy4   |
| chr10:49886092-49886381 | -29.00  | WDFY4   | -7282  | + | + | - | Yes | intergenic        | Active enhancer | Wdfy4   |
| chr10:49880967-49880974 | -25.09  | WDFY4   | -12548 | + | + | + | Yes | intergenic        | Other           | Wdfy4   |
| chr10:49889932-49890100 | -19.07  | WDFY4   | -3502  | + | + | - | Yes | intergenic        | Active enhancer | Wdfy4   |
| chr19:44066846-44067262 | -76.69  | XRCC1   | 12676  | + | + | - | No  | intronic          | Active enhancer | Xrcc1   |
| chr1:37942693-37943407  | -61.57  | ZC3H12A | 2931   | + | + | + | No  | intronic          | Other           | Zc3h12a |
| chr1:37944574-37945302  | -28.05  | ZC3H12A | 4819   | + | + | + | No  | intronic          | Other           | Zc3h12a |
| chr19:39900077-39900320 | -30.50  | ZFP36   | 2711   | + | + | + | No  | intergenic        | Other           | Zfp36   |
| chr19:39893313-39893643 | -28.06  | ZFP36   | -4009  | + | + | + | No  | intergenic        | Other           | Zfp36   |
| chr19:39894524-39894678 | -21.27  | ZFP36   | -2886  | + | + | - | No  | intergenic        | Active enhancer | Zfp36   |
| chr2:43358361-43358932  | -71.40  | ZFP36L2 | 95099  | + | + | - | No  | intergenic        | Active enhancer | Zfp36l2 |
| chr2:43446849-43447513  | -62.02  | ZFP36L2 | 6564   | + | + | + | No  | intergenic        | Other           | Zfp36l2 |
| chr2:43401528-43401902  | -44.16  | ZFP36L2 | 52030  | + | + | - | No  | intergenic        | Active enhancer | Zfp36l2 |
| chr2:43396265-43396766  | -40.84  | ZFP36L2 | 57230  | + | + | - | No  | intergenic        | Active enhancer | Zfp36l2 |
| chr2:43361182-43361686  | -35.08  | ZFP36L2 | 92311  | + | + | - | No  | intergenic        | Active enhancer | Zfp36l2 |
| chr2:43448740-43449097  | -26.90  | ZFP36L2 | 4827   | + | + | - | No  | intergenic        | Active enhancer | Zfp36l2 |
| chr2:43445666-43445835  | -23.30  | ZFP36L2 | 7995   | + | + | + | No  | intergenic        | Other           | Zfp36l2 |
| chr2:43448105-43448274  | -20.88  | ZFP36L2 | 5556   | + | + | - | No  | intergenic        | Active enhancer | Zfp36l2 |
| chr2:43452844-43453034  | -19.64  | ZFP36L2 | 806    | + | - | + | No  | promoter,intronic | Active promoter | Zfp36l2 |
| chr10:64412975-64413423 | -75.50  | ZNF365  | 132992 | + | + | - | No  | intronic          | Active enhancer | Zfp365  |
| chr10:64415272-64415602 | -48.12  | ZNF365  | 135230 | + | + | - | No  | intronic          | Active enhancer | Zfp365  |
| chr10:64391836-64392551 | -37.75  | ZNF365  | 111986 | + | + | + | No  | intronic          | Other           | Zfp365  |
| chr10:64396696-64397434 | -35.02  | ZNF365  | 116858 | + | + | + | No  | intronic          | Other           | Zfp365  |
| chr10:64391120-64391285 | -28.91  | ZNF365  | 110995 | + | + | - | No  | intronic          | Active enhancer | Zfp365  |
| chr10:64288250-64288499 | -26.86  | ZNF365  | 8167   | + | + | - | No  | intronic          | Active enhancer | Zfp365  |
| chr10:64397793-64398111 | -19.46  | ZNF365  | 117745 | + | + | - | No  | intronic          | Active enhancer | Zfp365  |

\* Poised promoters were defined based on the concurrent presence of H3K27me3 marks

\*\* The *Prdm1* gene was filtered out in the GEP analysis, but was in the leading edge of the GSEA analysis of Crebbp<sup>fl/fl</sup> vs Crebbp<sup>+/+</sup> GC B cells, and was experimentally validated.

**Supplementary Table 4.** Pathway enrichment analysis of CREBBP "core target" genes (bound by CREBBP in human GC B cells and downregulated in Crebbp<sup>fl/fl</sup> mouse GC B cells)

| Gene Set Name                                        | Gene Size (K) | Description*                                                      | N of Genes in Overlap (k) | k/K   | NOM p-val | FDR q-val |
|------------------------------------------------------|---------------|-------------------------------------------------------------------|---------------------------|-------|-----------|-----------|
| <b>MSigDB Database</b>                               |               |                                                                   |                           |       |           |           |
| <i>mature B cell related</i>                         |               |                                                                   |                           |       |           |           |
| REACTOME_IMMUNE_SYSTEM                               | 933           | Genes involved in Immune System                                   | 24                        | 0.026 | 1.02E-10  | 1.35E-07  |
| PID_NFAT_TFPATHWAY                                   | 47            | Calcineurin-regulated NFAT-dependent transcription in lymphocytes | 6                         | 0.128 | 1.44E-07  | 4.78E-05  |
| ST_FAS_SIGNALING_PATHWAY                             | 65            | Fas Signaling Pathway                                             | 6                         | 0.092 | 1.02E-06  | 2.70E-04  |
| KEGG_CYTOKINE_CYTOKINE_RECEPTOR_INTERACTION          | 267           | Cytokine-cytokine receptor interaction                            | 10                        | 0.038 | 1.27E-06  | 2.70E-04  |
| REACTOME_CD28_DEPENDENT_PI3K_AKT_SIGNALING           | 22            | Genes involved in CD28 dependent PI3K/Akt signaling               | 4                         | 0.182 | 4.38E-06  | 6.00E-04  |
| REACTOME_ADAPTIVE_IMMUNE_SYSTEM                      | 539           | Genes involved in Adaptive Immune System                          | 13                        | 0.024 | 4.51E-06  | 6.00E-04  |
| REACTOME_CYTOKINE_SIGNALING_IN_IMMUNE_SYSTEM         | 270           | Genes involved in Cytokine Signaling in Immune system             | 9                         | 0.033 | 1.11E-05  | 1.05E-03  |
| ST_GAQ_PATHWAY                                       | 28            | G alpha q Pathway                                                 | 4                         | 0.143 | 1.20E-05  | 1.06E-03  |
| ST_TUMOR_NECROSIS_FACTOR_PATHWAY                     | 29            | Tumor Necrosis Factor Pathway.                                    | 4                         | 0.138 | 1.38E-05  | 1.08E-03  |
| REACTOME_CD28_DEPENDENT_VAV1_PATHWAY                 | 11            | Genes involved in CD28 dependent Vav1 pathway                     | 3                         | 0.273 | 2.06E-05  | 1.38E-03  |
| PID_BCR_5PATHWAY                                     | 65            | BCR signaling pathway                                             | 5                         | 0.077 | 2.07E-05  | 1.38E-03  |
| REACTOME_CD28_CO_STIMULATION                         | 32            | Genes involved in CD28 co-stimulation                             | 4                         | 0.125 | 2.07E-05  | 1.38E-03  |
| SIG_CD40PATHWAYMAP                                   | 34            | Genes related to CD40 signaling                                   | 4                         | 0.118 | 2.65E-05  | 1.68E-03  |
| KEGG_B_CELL_RECEPTOR_SIGNALING_PATHWAY               | 75            | B cell receptor signaling pathway                                 | 5                         | 0.067 | 4.15E-05  | 2.30E-03  |
| PID_RAC1_REG_PATHWAY                                 | 38            | Regulation of RAC1 activity                                       | 4                         | 0.105 | 4.15E-05  | 2.30E-03  |
| KEGG_CELL_ADHESION_MOLECULES_CAMS                    | 134           | Cell adhesion molecules (CAMs)                                    | 6                         | 0.045 | 6.66E-05  | 3.41E-03  |
| BIOCARTA_TNFR2_PATHWAY                               | 18            | TNFR2 Signaling Pathway                                           | 3                         | 0.167 | 9.92E-05  | 4.89E-03  |
| KEGG_JAK_STAT_SIGNALING_PATHWAY                      | 155           | Jak-STAT signaling pathway                                        | 6                         | 0.039 | 1.48E-04  | 7.04E-03  |
| REACTOME_CTLA4_INHIBITORY_SIGNALING                  | 21            | Genes involved in CTLA4 inhibitory signaling                      | 3                         | 0.143 | 1.60E-04  | 7.09E-03  |
| KEGG_TOLL_LIKE_RECEPTOR_SIGNALING_PATHWAY            | 102           | Toll-like receptor signaling pathway                              | 5                         | 0.049 | 1.79E-04  | 7.44E-03  |
| REACTOME_SIGNALING_BY_ILS                            | 107           | Genes involved in Signaling by Interleukins                       | 5                         | 0.047 | 2.24E-04  | 8.77E-03  |
| PID_IL12_2PATHWAY                                    | 63            | IL12-mediated signaling events                                    | 4                         | 0.064 | 3.03E-04  | 1.06E-02  |
| REACTOME_COSTIMULATION_BY_THE_CD28_FAMILY            | 63            | Genes involved in Costimulation by the CD28 family                | 4                         | 0.064 | 3.03E-04  | 1.06E-02  |
| REACTOME_INTERFERON_GAMMA_SIGNALING                  | 63            | Genes involved in Interferon gamma signaling                      | 4                         | 0.064 | 3.03E-04  | 1.06E-02  |
| KEGG_MAPK_SIGNALING_PATHWAY                          | 267           | MAPK signaling pathway                                            | 7                         | 0.026 | 4.58E-04  | 1.38E-02  |
| PID_CD40_PATHWAY                                     | 31            | CD40/CD40L signaling                                              | 3                         | 0.097 | 5.21E-04  | 1.50E-02  |
| KEGG_BASE_EXCISION_REPAIR                            | 35            | Base excision repair                                              | 3                         | 0.086 | 7.47E-04  | 1.95E-02  |
| ST_GA13_PATHWAY                                      | 37            | G alpha 13 Pathway                                                | 3                         | 0.081 | 8.80E-04  | 2.25E-02  |
| ST_B_CELL_ANTIGEN_RECEPTOR                           | 40            | B Cell Antigen Receptor                                           | 3                         | 0.075 | 1.11E-03  | 2.57E-02  |
| REACTOME_TRYPTOPHAN_CATABOLISM                       | 11            | Genes involved in Tryptophan catabolism                           | 2                         | 0.182 | 1.37E-03  | 2.93E-02  |
| PID_RHOA_REG_PATHWAY                                 | 46            | Regulation of RhoA activity                                       | 3                         | 0.065 | 1.66E-03  | 3.30E-02  |
| PID_TNF_PATHWAY                                      | 46            | TNF receptor signaling pathway                                    | 3                         | 0.065 | 1.66E-03  | 3.30E-02  |
| SIG_BCR_SIGNALING_PATHWAY                            | 46            | Members of the BCR signaling pathway                              | 3                         | 0.065 | 1.66E-03  | 3.30E-02  |
| PID_CXCR4_PATHWAY                                    | 102           | CXCR4-mediated signaling events                                   | 4                         | 0.039 | 1.86E-03  | 3.63E-02  |
| PID_PI3KC1_PATHWAY                                   | 49            | Class I PI3K signaling events                                     | 3                         | 0.061 | 2.00E-03  | 3.64E-02  |
| REACTOME_TRAFFICKING_AND_PROCESSING_OF_ENDOSOMAL_TLR | 14            | Genes involved in Trafficking and processing of endosomal TLR     | 2                         | 0.143 | 2.24E-03  | 4.02E-02  |
| PID_PTP1B_PATHWAY                                    | 52            | Signaling events mediated by PTP1B                                | 3                         | 0.058 | 2.37E-03  | 4.20E-02  |
| BIOCARTA_CD40_PATHWAY                                | 15            | CD40L Signaling Pathway                                           | 2                         | 0.133 | 2.57E-03  | 4.44E-02  |
| PID_NFAT_3PATHWAY                                    | 54            | Role of Calcineurin-dependent NFAT signaling in lymphocytes       | 3                         | 0.056 | 2.64E-03  | 4.50E-02  |
| REACTOME_SIGNALING_BY_RHO_GTPASES                    | 113           | Genes involved in Signaling by Rho GTPases                        | 4                         | 0.035 | 2.69E-03  | 4.53E-02  |



| Gene Set Name                                       | Gene Size (K) | Description*                                                                           | N of Genes in Overlap (k) | k/K   | NOM p-val | FDR q-val |
|-----------------------------------------------------|---------------|----------------------------------------------------------------------------------------|---------------------------|-------|-----------|-----------|
| <i>other</i>                                        |               |                                                                                        |                           |       |           |           |
| PID_TCR_PATHWAY                                     | 66            | TCR signaling in naive CD4+ T cells                                                    | 7                         | 0.106 | 4.75E-08  | 2.11E-05  |
| BIOCARTA_TH1TH2_PATHWAY                             | 19            | Th1/Th2 Differentiation                                                                | 5                         | 0.263 | 3.52E-08  | 2.11E-05  |
| KEGG_T_CELL_RECEPTOR_SIGNALING_PATHWAY              | 108           | T cell receptor signaling pathway                                                      | 7                         | 0.065 | 1.42E-06  | 2.70E-04  |
| ST_T_CELL_SIGNAL_TRANSDUCTION                       | 45            | T Cell Signal Transduction                                                             | 5                         | 0.111 | 3.32E-06  | 5.52E-04  |
| REACTOME_DEVELOPMENTAL_BIOLOGY                      | 396           | Genes involved in Developmental Biology                                                | 11                        | 0.028 | 6.67E-06  | 8.06E-04  |
| PID_CD8_TCR_PATHWAY                                 | 53            | TCR signaling in na&#xef;ve CD8+ T cells                                               | 5                         | 0.094 | 7.55E-06  | 8.37E-04  |
| BIOCARTA_NKT_PATHWAY                                | 29            | Selective expression of chemokine receptors during T-cell polarization                 | 4                         | 0.138 | 1.38E-05  | 1.08E-03  |
| KEGG_LEISHMANIA_INFECTION                           | 72            | Leishmania infection                                                                   | 5                         | 0.069 | 3.40E-05  | 2.06E-03  |
| REACTOME_AXON_GUIDANCE                              | 251           | Genes involved in Axon guidance                                                        | 8                         | 0.032 | 4.70E-05  | 2.50E-03  |
| BIOCARTA_CTLA4_PATHWAY                              | 21            | The Co-Stimulatory Signal During T-cell Activation                                     | 3                         | 0.143 | 1.60E-04  | 7.09E-03  |
| REACTOME_TCR_SIGNALING                              | 54            | Genes involved in TCR signaling                                                        | 4                         | 0.074 | 1.67E-04  | 7.16E-03  |
| BIOCARTA_DC_PATHWAY                                 | 22            | Dendritic cells in regulating TH1 and TH2 Development                                  | 3                         | 0.136 | 1.85E-04  | 7.44E-03  |
| PID_GLYPICAN_1PATHWAY                               | 27            | Glypican 1 network                                                                     | 4                         | 0.148 | 1.03E-05  | 1.05E-03  |
| BIOCARTA_EPHA4_PATHWAY                              | 10            | Eph Kinases and ephrins support platelet aggregation                                   | 2                         | 0.200 | 1.12E-03  | 2.57E-02  |
| PID_FCER1_PATHWAY                                   | 62            | Fc-epsilon receptor I signaling in mast cells                                          | 4                         | 0.065 | 2.85E-04  | 1.06E-02  |
| KEGG_LEUKOCYTE_TRANSENDOTHELIAL_MIGRATION           | 118           | Leukocyte transendothelial migration                                                   | 5                         | 0.042 | 3.53E-04  | 1.17E-02  |
| REACTOME_GENERATION_OF_SECOND_MESSENGER_MOLECULES   | 27            | Genes involved in Generation of second messenger molecules                             | 3                         | 0.111 | 3.44E-04  | 1.17E-02  |
| KEGG_ENDOCYTOSIS                                    | 183           | Endocytosis                                                                            | 6                         | 0.033 | 3.63E-04  | 1.18E-02  |
| REACTOME_SEMAPHORIN_INTERACTIONS                    | 68            | Genes involved in Semaphorin interactions                                              | 4                         | 0.059 | 4.07E-04  | 1.29E-02  |
| BIOCARTA_VIP_PATHWAY                                | 29            | Neuropeptides VIP and PACAP inhibit the apoptosis of activated T cells                 | 3                         | 0.103 | 4.26E-04  | 1.32E-02  |
| PID_EPHRINB_REV_PATHWAY                             | 30            | Ephrin B reverse signaling                                                             | 3                         | 0.100 | 4.72E-04  | 1.40E-02  |
| KEGG_AXON_GUIDANCE                                  | 129           | Axon guidance                                                                          | 5                         | 0.039 | 5.30E-04  | 1.50E-02  |
| REACTOME_HEMOSTASIS                                 | 466           | Genes involved in Hemostasis                                                           | 9                         | 0.019 | 6.80E-04  | 1.89E-02  |
| KEGG_NATURAL_KILLER_CELL_MEDIATED_CYTOTOXICITY      | 137           | Natural killer cell mediated cytotoxicity                                              | 5                         | 0.037 | 6.96E-04  | 1.89E-02  |
| KEGG_PRIMARY_IMMUNODEFICIENCY                       | 35            | Primary immunodeficiency                                                               | 3                         | 0.086 | 7.47E-04  | 1.95E-02  |
| KEGG_ALLOGRAFT_REJECTION                            | 38            | Allograft rejection                                                                    | 3                         | 0.079 | 9.52E-04  | 2.39E-02  |
| KEGG_HEMATOPOIETIC_CELL_LINEAGE                     | 88            | Hematopoietic cell lineage                                                             | 4                         | 0.046 | 1.08E-03  | 2.57E-02  |
| KEGG_TRYPTOPHAN_METABOLISM                          | 40            | Tryptophan metabolism                                                                  | 3                         | 0.075 | 1.11E-03  | 2.57E-02  |
| REACTOME_PECAM1_INTERACTIONS                        | 10            | Genes involved in PECAM1 interactions                                                  | 2                         | 0.200 | 1.12E-03  | 2.57E-02  |
| PID_AMB2_NEUTROPHILS_PATHWAY                        | 41            | amb2 Integrin signaling                                                                | 3                         | 0.073 | 1.19E-03  | 2.64E-02  |
| REACTOME_NETRIN1_SIGNALING                          | 41            | Genes involved in Netrin-1 signaling                                                   | 3                         | 0.073 | 1.19E-03  | 2.64E-02  |
| REACTOME_CELL_SURFACE_INTERACTIONS_AT_THE_VASCULAR_ | 91            | Genes involved in Cell surface interactions at the vascular wall                       | 4                         | 0.044 | 1.22E-03  | 2.66E-02  |
| REACTOME_PLATELET_ADHESION_TO_EXPOSED_COLLAGEN      | 12            | Genes involved in Platelet Adhesion to exposed collagen                                | 2                         | 0.167 | 1.63E-03  | 3.30E-02  |
| REACTOME_RESOLUTION_OF_AP_SITES                     | 12            | Genes involved in Resolution of AP sites via the single-nucleotide replacement pathway | 2                         | 0.167 | 1.63E-03  | 3.30E-02  |
| BIOCARTA_TCR_PATHWAY                                | 49            | T Cell Receptor Signaling Pathway                                                      | 3                         | 0.061 | 2.00E-03  | 3.64E-02  |
| PID_ARF6_TRAFFICKING_PATHWAY                        | 49            | Arf6 trafficking events                                                                | 3                         | 0.061 | 2.00E-03  | 3.64E-02  |
| BIOCARTA_TCRA_PATHWAY                               | 13            | Lck and Fyn tyrosine kinases in initiation of TCR Activation                           | 2                         | 0.154 | 1.92E-03  | 3.64E-02  |
| REACTOME_DCC_MEDIATED_ATTRACTIVE_SIGNALING          | 13            | Genes involved in DCC mediated attractive signaling                                    | 2                         | 0.154 | 1.92E-03  | 3.64E-02  |
| REACTOME_OTHER_SEMAPHORIN_INTERACTIONS              | 15            | Genes involved in Other semaphorin interactions                                        | 2                         | 0.133 | 2.57E-03  | 4.44E-02  |
| BIOCARTA_GATA3_PATHWAY                              | 16            | GATA3 participate in activating the Th2 cytokine genes expression                      | 2                         | 0.125 | 2.93E-03  | 4.87E-02  |

| Gene Set Name                               | Gene Size (K) | Description*                                                                                                | N of Genes in Overlap (k) | k/K   | NOM p-val   | FDR q-val   |
|---------------------------------------------|---------------|-------------------------------------------------------------------------------------------------------------|---------------------------|-------|-------------|-------------|
| <b>LymphoChIP Database</b>                  |               |                                                                                                             |                           |       |             |             |
| CD40_upregulated_Burkitt_lymphoma           | 101           | Basso K et. al. Blood. 2004 Dec 15;104(13):4088-96.                                                         | 15                        | 0.150 | 6.31E-12    | 1.83E-09    |
| NFKB_Up_all_OCILy3_Ly10                     | 68            | Lam LT et. al. Blood. 2008 Apr 1;111(7):3701-13.                                                            | 11                        | 0.160 | 3.84E-09    | 0.000000371 |
| GC_B_cell_U133Plus                          | 334           | Dave SS et. al. NEJM 354:2431 (2006)                                                                        | 20                        | 0.060 | 6.89E-09    | 0.000000499 |
| NFKB_Up_HBL1                                | 221           | Staudt's lab Unpublished data                                                                               | 17                        | 0.080 | 3.73E-09    | 0.000000541 |
| NFKB_Up_bothOCILy3andLy10                   | 40            | Lam LT et. al. Clin Cancer Res. 2005 Jan 1;11(1):28-40.<br>Lam LT et. al. Blood. 2008 Apr 1;111(7):3701-13. | 9                         | 0.220 | 1.15E-08    | 0.000000665 |
| Myc_ChIP_PET_Expr_Down                      | 262           | Zeller KI et. al. Proc Natl Acad Sci U S A. 2006 Nov 21;103(47):17834-9.                                    | 16                        | 0.060 | 0.000000256 | 0.0000124   |
| IL6_Ly10_Up_group1                          | 26            | Lam LT et. al. Blood. 2008 Apr 1;111(7):3701-13.                                                            | 7                         | 0.270 | 0.000000333 | 0.0000138   |
| Blimp_Bcell_repressed                       | 65            | Shaffer AL et. al. Immunity. 2002 Jul;17(1):51-62.                                                          | 9                         | 0.140 | 0.000000593 | 0.0000215   |
| IL10_OCILy3_Up                              | 124           | Lam LT et. al. Blood. 2008 Apr 1;111(7):3701-13.                                                            | 11                        | 0.090 | 0.00000125  | 0.0000404   |
| Myc_ChIP_PET_2plus                          | 3297          | Zeller KI et. al. Proc Natl Acad Sci U S A. 2006 Nov 21;103(47):17834-9.                                    | 66                        | 0.020 | 0.00000153  | 0.0000442   |
| IL6_Ly10_Up_all                             | 40            | Lam LT et. al. Blood. 2008 Apr 1;111(7):3701-13.                                                            | 7                         | 0.180 | 0.00000487  | 0.000128    |
| Quiescence_heme_cluster1                    | 152           | Su AI et. al. Proc Natl Acad Sci U S A. 2004 Apr 20;101(16):6062-7.                                         | 11                        | 0.070 | 0.00000786  | 0.00019     |
| Quiescence_heme_all                         | 273           | Su AI et. al. Proc Natl Acad Sci U S A. 2004 Apr 20;101(16):6062-7.                                         | 14                        | 0.050 | 0.0000122   | 0.000252    |
| NFKB_Up_BCR_paper                           | 69            | Davis RE et. al. Nature. 2010 Jan 7;463(7277):88-92.                                                        | 8                         | 0.120 | 0.0000113   | 0.000252    |
| Blood_Module-3.2_Inflammation-1             | 245           | Chaussabel D et. al. Immunity. 2008 Jul 18;29(1):9-11.                                                      | 13                        | 0.050 | 0.00002     | 0.000362    |
| Dendritic_cell_CD123pos_blood               | 328           | Lindstedt M et. al. J Immunol 175:4839 (2005)                                                               | 15                        | 0.050 | 0.0000193   | 0.000373    |
| JAK_Up_HBL1                                 | 349           | Staudt's lab Unpublished data                                                                               | 15                        | 0.040 | 0.0000381   | 0.000649    |
| BCL6_ChIP-CHIP_all_Ci                       | 3016          | Ci W et. al. Blood. 2009 May 28;113(22):5536-48.                                                            | 57                        | 0.020 | 0.0000573   | 0.000923    |
| GC_B_cell_BL_equal_DLBCl                    | 233           | Dave SS et. al. Molecular diagnosis of Burkitt's lymphoma. NEJM 354:2431 (2006)                             | 12                        | 0.050 | 0.0000618   | 0.000943    |
| Tcell_Plind_CsAdown4x                       | 69            | Feske S et. al. Nat Immunol. 2001 Apr;2(4):316-24.                                                          | 7                         | 0.100 | 0.000116    | 0.00169     |
| Tcell_Plind4x_Feske_Fig6                    | 101           | Feske S et. al. Nat Immunol. 2001 Apr;2(4):316-24.                                                          | 8                         | 0.080 | 0.000134    | 0.00184     |
| GC_B_cell_BLow_DLBClhigh                    | 49            | Dave SS et. al. NEJM 354:2431 (2006)                                                                        | 6                         | 0.120 | 0.000205    | 0.00271     |
| Blood_Module-2.6_Myeloid_lineage-2          | 145           | Chaussabel D et. al. Immunity. 2008 Jul 18;29(1):9-11.                                                      | 9                         | 0.060 | 0.000219    | 0.00276     |
| Resting_blood_B_cell_GNF                    | 83            | Su AI et. al. Proc Natl Acad Sci U S A. 2004 Apr 20;101(16):6062-7.                                         | 7                         | 0.080 | 0.000322    | 0.00389     |
| ABCgtGCB_U133AB                             | 286           | Staudt's lab Unpublished data                                                                               | 12                        | 0.040 | 0.000369    | 0.00412     |
| Pan_B_U133plus                              | 86            | Staudt's lab Unpublished data                                                                               | 7                         | 0.080 | 0.00039     | 0.00419     |
| Hematopoietic_Node1658                      | 85            | Su AI et. al. Proc Natl Acad Sci U S A. 2004 Apr 20;101(16):6062-7.                                         | 7                         | 0.080 | 0.000366    | 0.00425     |
| Tcell_Plind_CalciumDefPtupdown4x_Feske_Fig6 | 85            | Feske S et. al. Nat Immunol. 2001 Apr;2(4):316-24.                                                          | 7                         | 0.080 | 0.000366    | 0.00425     |
| Blood_Module-2.1_Cytotoxic_cells            | 160           | Chaussabel D et. al. Immunity. 2008 Jul 18;29(1):9-11.                                                      | 9                         | 0.060 | 0.000425    | 0.00441     |
| GCB_gt_ABC_U133plus                         | 308           | Staudt's lab Unpublished data                                                                               | 12                        | 0.040 | 0.000684    | 0.00684     |
| GC_T_helper_up2x_Chtanova                   | 427           | Chtanova T et. al. J Immunol. 2004 Jul 1;173(1):68-78.                                                      | 14                        | 0.030 | 0.00101     | 0.00920     |
| B_cell_up_anergy                            | 18            | Glynn R et. al. Nature. 2000 Feb 10;403(6770):672-6.                                                        | 4                         | 0.220 | 0.000969    | 0.00937     |
| PMBL_HL_high                                | 69            | Rosenwald A et. al. J Exp Med. 2003 Sep 15;198(6):851-62.                                                   | 6                         | 0.090 | 0.00101     | 0.00946     |
| Tcell_Plind4x_CsAindependent                | 19            | Feske S et. al. Nat Immunol. 2001 Apr;2(4):316-24.                                                          | 4                         | 0.210 | 0.00114     | 0.01000     |
| OCAB_up                                     | 7             | Kim U et. al. Proc Natl Acad Sci U S A. 2003 Jul 22;100(15):8868-73.                                        | 3                         | 0.430 | 0.00247     | 0.02110     |
| Blood_Module-1.3_B_cells                    | 55            | Chaussabel D et. al. Immunity. 2008 Jul 18;29(1):9-11.                                                      | 5                         | 0.090 | 0.00322     | 0.02670     |
| Tcell_Plprep_CalciumDefPtup4x_Feske_Fig4    | 29            | Feske S et. al. Nat Immunol. 2001 Apr;2(4):316-24.                                                          | 4                         | 0.140 | 0.00397     | 0.03200     |
| Blood_Module-3.3_Inflammation-2             | 233           | Chaussabel D et. al. Immunity. 2008 Jul 18;29(1):9-11.                                                      | 9                         | 0.040 | 0.00459     | 0.03590     |
| Thymic_DP_Tcell_gt_Thymic_progenitor_Tcell  | 65            | Lee MS et. al. 2004 Aug;16(8):1109-24. Epub 2004 Jun 21.                                                    | 5                         | 0.080 | 0.00587     | 0.04360     |
| MCL_gt_SLL_DLBCl                            | 33            | Rosenwald A et. al. Cancer Cell. 2003 Feb;3(2):185-97.                                                      | 4                         | 0.120 | 0.00573     | 0.04380     |
| Myc_ChIP_PET_3plus                          | 473           | Zeller KI et. al. Proc Natl Acad Sci U S A. 2006 Nov 21;103(47):17834-9.                                    | 13                        | 0.030 | 0.00676     | 0.04900     |

\*For the Lymphochip database, the reference study from which the signature was derived is listed

**Supplementary Table 5.** Leading edge associated with the GSEA presented in Figure 2G

| GENE SYMBOL                                                                                                                                   | PROBE ACCESSION | RANK IN GENE LIST | RANK METRIC SCORE | RUNNING ES | CORE ENRICHMENT |
|-----------------------------------------------------------------------------------------------------------------------------------------------|-----------------|-------------------|-------------------|------------|-----------------|
| <i>GSEA of Crebbp core targets in the rank of genes differentially expressed in Crebbp<sup>fl/fl</sup> vs Crebbp<sup>+/-</sup> GC B cells</i> |                 |                   |                   |            |                 |
| Snx29                                                                                                                                         | 1456922_at      | 18640             | -0.573234         | -0.611521  | Yes             |
| Slc45a4                                                                                                                                       | 1433559_at      | 18651             | -0.573812         | -0.609580  | Yes             |
| Hsh2d                                                                                                                                         | 1442130_at      | 18672             | -0.576436         | -0.608076  | Yes             |
| Stt3b                                                                                                                                         | 1426343_at      | 18703             | -0.578022         | -0.607015  | Yes             |
| Hnrmpd                                                                                                                                        | 1458273_at      | 18750             | -0.583464         | -0.606649  | Yes             |
| Il6ra                                                                                                                                         | 1452416_at      | 18773             | -0.585525         | -0.605197  | Yes             |
| Ezr                                                                                                                                           | 1450850_at      | 18805             | -0.589647         | -0.604133  | Yes             |
| Nfatc2                                                                                                                                        | 1439205_at      | 18896             | -0.600871         | -0.605669  | Yes             |
| Rnf167                                                                                                                                        | 1430527_a_at    | 18917             | -0.603093         | -0.604054  | Yes             |
| Cd180                                                                                                                                         | 1421547_at      | 18995             | -0.613127         | -0.604956  | Yes             |
| Trim14                                                                                                                                        | 1430796_at      | 19044             | -0.620909         | -0.604524  | Yes             |
| Wdfy4                                                                                                                                         | 1435582_at      | 19078             | -0.626080         | -0.603397  | Yes             |
| Nfam1                                                                                                                                         | 1428790_at      | 19190             | -0.640877         | -0.605709  | Yes             |
| Rab4b                                                                                                                                         | 1451643_a_at    | 19218             | -0.644276         | -0.604237  | Yes             |
| Cd68                                                                                                                                          | 1449164_at      | 19232             | -0.645519         | -0.602132  | Yes             |
| Jdp2                                                                                                                                          | 1424972_at      | 19234             | -0.645830         | -0.599486  | Yes             |
| Prkd2                                                                                                                                         | 1434333_a_at    | 19385             | -0.664278         | -0.603451  | Yes             |
| Herpud1                                                                                                                                       | 1448185_at      | 19448             | -0.672104         | -0.603434  | Yes             |
| Traf1                                                                                                                                         | 1423602_at      | 19451             | -0.672374         | -0.600723  | Yes             |
| Ppan                                                                                                                                          | 1423703_at      | 19452             | -0.672503         | -0.597922  | Yes             |
| Strada                                                                                                                                        | 1438591_at      | 19496             | -0.677811         | -0.597028  | Yes             |
| Grp                                                                                                                                           | 1429387_at      | 19546             | -0.684528         | -0.596376  | Yes             |
| Fam49a                                                                                                                                        | 1454806_at      | 19584             | -0.688829         | -0.595167  | Yes             |
| Dtx1                                                                                                                                          | 1425822_a_at    | 19682             | -0.702496         | -0.596595  | Yes             |
| Myo1e                                                                                                                                         | 1420159_at      | 19687             | -0.702876         | -0.593846  | Yes             |
| Irf5                                                                                                                                          | 1460231_at      | 19819             | -0.724291         | -0.596709  | Yes             |
| Gch1                                                                                                                                          | 1420499_at      | 19966             | -0.748602         | -0.600143  | Yes             |
| Hip1                                                                                                                                          | 1432017_at      | 19982             | -0.749584         | -0.597693  | Yes             |
| Sit1                                                                                                                                          | 1418751_at      | 20047             | -0.760551         | -0.597398  | Yes             |
| Use1                                                                                                                                          | 1423817_s_at    | 20265             | -0.799882         | -0.603805  | Yes             |
| Elk3                                                                                                                                          | 1448797_at      | 20330             | -0.811768         | -0.603296  | Yes             |
| Gpr174                                                                                                                                        | 1440900_at      | 20401             | -0.822596         | -0.603011  | Yes             |
| Bmf                                                                                                                                           | 1454880_s_at    | 20403             | -0.823052         | -0.599627  | Yes             |
| Jmjd1c                                                                                                                                        | 1426900_at      | 20538             | -0.847713         | -0.602110  | Yes             |
| Sytl3                                                                                                                                         | 1445310_at      | 20575             | -0.852143         | -0.600176  | Yes             |
| Itpr2                                                                                                                                         | 1424834_s_at    | 20707             | -0.882969         | -0.602377  | Yes             |
| Derl3                                                                                                                                         | 1453677_a_at    | 20734             | -0.888056         | -0.599845  | Yes             |
| Hemgn                                                                                                                                         | 1418199_at      | 20737             | -0.888498         | -0.596234  | Yes             |
| Tpk1                                                                                                                                          | 1425388_a_at    | 20746             | -0.890098         | -0.592885  | Yes             |
| Gramd3                                                                                                                                        | 1428736_at      | 20749             | -0.891335         | -0.589262  | Yes             |
| Parp1                                                                                                                                         | 1443573_at      | 20826             | -0.909118         | -0.588886  | Yes             |
| Evl                                                                                                                                           | 1440885_at      | 20904             | -0.928996         | -0.588472  | Yes             |
| Zc3h12a                                                                                                                                       | 1427348_at      | 20945             | -0.940130         | -0.586351  | Yes             |
| Itk                                                                                                                                           | 1430833_at      | 20991             | -0.954221         | -0.584396  | Yes             |
| Chst10                                                                                                                                        | 1426620_at      | 20992             | -0.954513         | -0.580420  | Yes             |
| Cd5                                                                                                                                           | 1418353_at      | 21021             | -0.963140         | -0.577665  | Yes             |
| Rab31                                                                                                                                         | 1416165_at      | 21026             | -0.964276         | -0.573828  | Yes             |
| Rgs3                                                                                                                                          | 1449516_a_at    | 21057             | -0.972264         | -0.571124  | Yes             |
| Trio                                                                                                                                          | 1454711_at      | 21061             | -0.973085         | -0.567206  | Yes             |
| Fyn                                                                                                                                           | 1448765_at      | 21083             | -0.977668         | -0.564076  | Yes             |
| Tmem109                                                                                                                                       | 1437008_x_at    | 21148             | -0.999908         | -0.562783  | Yes             |
| Cotl1                                                                                                                                         | 1437811_x_at    | 21183             | -1.009390         | -0.560104  | Yes             |
| Arsb                                                                                                                                          | 1429189_at      | 21237             | -1.028101         | -0.558200  | Yes             |
| Selplg                                                                                                                                        | 1449127_at      | 21309             | -1.051576         | -0.557007  | Yes             |
| Sh2d3c                                                                                                                                        | 1415886_at      | 21316             | -1.055900         | -0.552877  | Yes             |
| Cd22                                                                                                                                          | 1419769_at      | 21324             | -1.061516         | -0.548770  | Yes             |
| Fermt3                                                                                                                                        | 1443641_at      | 21380             | -1.081757         | -0.546732  | Yes             |
| Rab30                                                                                                                                         | 1426452_a_at    | 21388             | -1.084969         | -0.542527  | Yes             |
| Akap2                                                                                                                                         | 1449168_a_at    | 21402             | -1.090813         | -0.538567  | Yes             |
| Cd82                                                                                                                                          | 1416401_at      | 21430             | -1.103936         | -0.535180  | Yes             |
| Gpr18                                                                                                                                         | 1439141_at      | 21466             | -1.118472         | -0.532092  | Yes             |
| Mical3                                                                                                                                        | 1439893_at      | 21504             | -1.137960         | -0.529013  | Yes             |
| Syne1                                                                                                                                         | 1455493_at      | 21528             | -1.148617         | -0.525260  | Yes             |
| Tespa1                                                                                                                                        | 1439981_at      | 21539             | -1.154173         | -0.520901  | Yes             |
| Cxcr5                                                                                                                                         | 1422003_at      | 21560             | -1.161566         | -0.516961  | Yes             |

|          |              |       |           |           |     |
|----------|--------------|-------|-----------|-----------|-----|
| Sh3bp2   | 1448328_at   | 21598 | -1.179394 | -0.513709 | Yes |
| Ncf4     | 1418465_at   | 21631 | -1.197819 | -0.510155 | Yes |
| Ptprs    | 1426794_at   | 21664 | -1.216876 | -0.506523 | Yes |
| Card11   | 1430257_at   | 21679 | -1.225263 | -0.502047 | Yes |
| Ahcy12   | 1452703_at   | 21697 | -1.234039 | -0.497670 | Yes |
| Clcf1    | 1437271_at   | 21712 | -1.241624 | -0.493126 | Yes |
| Srebf2   | 1426744_at   | 21771 | -1.267823 | -0.490448 | Yes |
| Plekhn3  | 1455331_at   | 21775 | -1.269120 | -0.485296 | Yes |
| Cnr2     | 1450476_at   | 21798 | -1.285427 | -0.480929 | Yes |
| Pdxk     | 1427931_s_at | 21807 | -1.293144 | -0.475902 | Yes |
| Dusp2    | 1450698_at   | 21862 | -1.330840 | -0.472782 | Yes |
| Cbfa2t3  | 1440963_at   | 21874 | -1.342244 | -0.467684 | Yes |
| Ubxn11   | 1426105_a_at | 21876 | -1.343435 | -0.462133 | Yes |
| Sema7a   | 1459903_at   | 21885 | -1.349662 | -0.456870 | Yes |
| Junb     | 1415899_at   | 21904 | -1.365759 | -0.451989 | Yes |
| Zfp36    | 1452519_a_at | 21923 | -1.378148 | -0.447057 | Yes |
| Zfp365   | 1433583_at   | 21937 | -1.388077 | -0.441858 | Yes |
| Acap1    | 1434873_a_at | 21938 | -1.388191 | -0.436076 | Yes |
| Rab37    | 1433947_at   | 21941 | -1.390540 | -0.430373 | Yes |
| Rhof     | 1434794_at   | 21975 | -1.424525 | -0.425920 | Yes |
| Skap2    | 1460623_at   | 21999 | -1.448820 | -0.420918 | Yes |
| Arhgap9  | 1419810_x_at | 22024 | -1.467439 | -0.415882 | Yes |
| Iqsec1   | 1452327_at   | 22025 | -1.469980 | -0.409759 | Yes |
| Fgd2     | 1419515_at   | 22047 | -1.494683 | -0.404476 | Yes |
| Jarid2   | 1422698_s_at | 22054 | -1.505766 | -0.398473 | Yes |
| Pxk      | 1451253_at   | 22088 | -1.544847 | -0.393519 | Yes |
| Per1     | 1449851_at   | 22091 | -1.551585 | -0.387146 | Yes |
| Smarchb1 | 1456938_at   | 22107 | -1.571859 | -0.381271 | Yes |
| Echdc3   | 1418862_at   | 22115 | -1.579760 | -0.375005 | Yes |
| Lime1    | 1448500_a_at | 22124 | -1.592196 | -0.368732 | Yes |
| Ppp1r18  | 1431299_a_at | 22127 | -1.594774 | -0.362179 | Yes |
| Cyth4    | 1460437_at   | 22136 | -1.609292 | -0.355834 | Yes |
| Tank     | 1421640_a_at | 22160 | -1.642140 | -0.350027 | Yes |
| Nek8     | 1450337_a_at | 22179 | -1.673874 | -0.343862 | Yes |
| Trim7    | 1439352_at   | 22204 | -1.730077 | -0.337733 | Yes |
| Ciita    | 1421211_a_at | 22210 | -1.741439 | -0.330703 | Yes |
| Id2      | 1422537_a_at | 22224 | -1.765146 | -0.323934 | Yes |
| Rnf122   | 1454857_at   | 22227 | -1.771168 | -0.316646 | Yes |
| Grn      | 1456567_x_at | 22238 | -1.788281 | -0.309646 | Yes |
| Adck3    | 1417067_s_at | 22247 | -1.799316 | -0.302510 | Yes |
| Tgfb3    | 1417455_at   | 22286 | -1.925836 | -0.296193 | Yes |
| Nfkbie   | 1458299_s_at | 22289 | -1.929343 | -0.288247 | Yes |
| Cd86     | 1420404_at   | 22306 | -1.982565 | -0.280706 | Yes |
| Nab2     | 1417930_at   | 22310 | -1.993818 | -0.272536 | Yes |
| Klf12    | 1439847_s_at | 22316 | -2.008478 | -0.264394 | Yes |
| Lck      | 1425396_a_at | 22323 | -2.044157 | -0.256149 | Yes |
| Slc2a6   | 1434015_at   | 22326 | -2.048720 | -0.247705 | Yes |
| Tnfaip3  | 1433699_at   | 22361 | -2.096725 | -0.240497 | Yes |
| Ifngr2   | 1423557_at   | 22362 | -2.097431 | -0.231760 | Yes |
| Nfkb2    | 1425902_a_at | 22363 | -2.099496 | -0.223015 | Yes |
| Ncf1     | 1456772_at   | 22368 | -2.122901 | -0.214352 | Yes |
| Hs3st1   | 1423450_a_at | 22372 | -2.160137 | -0.205488 | Yes |
| Map3k8   | 1419208_at   | 22394 | -2.204385 | -0.197249 | Yes |
| Pld4     | 1433678_at   | 22400 | -2.220590 | -0.188223 | Yes |
| Slamf1   | 1425570_at   | 22408 | -2.274669 | -0.179062 | Yes |
| Cd40     | 1449473_s_at | 22419 | -2.358995 | -0.169685 | Yes |
| Stx11    | 1453228_at   | 22430 | -2.436237 | -0.159986 | Yes |
| Cd72     | 1426112_a_at | 22441 | -2.532118 | -0.149887 | Yes |
| Cd69     | 1428735_at   | 22454 | -2.636260 | -0.139445 | Yes |
| Relb     | 1417856_at   | 22459 | -2.713200 | -0.128323 | Yes |
| Camta1   | 1433972_at   | 22469 | -2.773071 | -0.117175 | Yes |
| Ffar2    | 1425216_at   | 22477 | -2.808074 | -0.105793 | Yes |
| Fcer2a   | 1422122_at   | 22482 | -2.840946 | -0.094138 | Yes |
| Samsn1   | 1421457_a_at | 22486 | -2.889887 | -0.082236 | Yes |
| Fam167a  | 1455872_at   | 22491 | -2.986498 | -0.069975 | Yes |
| Bcl2a1d  | 1419004_s_at | 22495 | -3.097661 | -0.057207 | Yes |
| Irf4     | 1421173_at   | 22498 | -3.102655 | -0.044372 | Yes |
| Nfkbid   | 1436074_at   | 22503 | -3.156071 | -0.031406 | Yes |
| Egr2     | 1427683_at   | 22507 | -3.248923 | -0.018007 | Yes |
| Egr3     | 1436329_at   | 22523 | -4.495359 | 0.000045  | Yes |

*GSEA of LZ-upregulated genes in the rank of genes differentially expressed in DZ vs LZ GC B cells*

|          |              |      |          |          |     |
|----------|--------------|------|----------|----------|-----|
| Rgs1     | 1417601_at   | 25   | 0.354511 | 0.032362 | Yes |
| Nr4a1    | 1416505_at   | 56   | 0.295961 | 0.058971 | Yes |
| Ebi3     | 1449222_at   | 247  | 0.189698 | 0.068396 | Yes |
| Gatm     | 1423569_at   | 254  | 0.189214 | 0.085997 | Yes |
| Map3k8   | 1419208_at   | 311  | 0.183558 | 0.100829 | Yes |
| Lck      | 1425396_a_at | 388  | 0.171893 | 0.113667 | Yes |
| Junb     | 1415899_at   | 449  | 0.163374 | 0.126414 | Yes |
| Egr3     | 1436329_at   | 470  | 0.161406 | 0.140763 | Yes |
| Grn      | 1448148_at   | 471  | 0.161325 | 0.155998 | Yes |
| Sub1     | 1422692_at   | 594  | 0.149021 | 0.164621 | Yes |
| Cyth4    | 1460437_at   | 614  | 0.147376 | 0.177689 | Yes |
| Per1     | 1449851_at   | 649  | 0.143716 | 0.189742 | Yes |
| Nab2     | 1417930_at   | 744  | 0.136848 | 0.198466 | Yes |
| Clcf1    | 1450262_at   | 766  | 0.135867 | 0.210358 | Yes |
| Cdk5r1   | 1421123_at   | 811  | 0.132624 | 0.220917 | Yes |
| Rsad1    | 1440875_a_at | 845  | 0.130715 | 0.231787 | Yes |
| Ciita    | 1421210_at   | 858  | 0.129736 | 0.243502 | Yes |
| Cd40     | 1460415_a_at | 891  | 0.128031 | 0.254163 | Yes |
| Arid3b   | 1423526_at   | 951  | 0.125018 | 0.263334 | Yes |
| Rhof     | 1434794_at   | 1046 | 0.120313 | 0.270496 | Yes |
| Myc      | 1424942_a_at | 1213 | 0.114032 | 0.273848 | Yes |
| Abhd6    | 1419103_a_at | 1370 | 0.108939 | 0.277167 | Yes |
| Jarid2   | 1422698_s_at | 1374 | 0.108874 | 0.287314 | Yes |
| Samsn1   | 1421457_a_at | 1393 | 0.107993 | 0.296708 | Yes |
| Tnfaip3  | 1433699_at   | 1423 | 0.107060 | 0.305523 | Yes |
| Relb     | 1417856_at   | 1434 | 0.106622 | 0.315145 | Yes |
| Orai1    | 1424989_at   | 1455 | 0.105920 | 0.324254 | Yes |
| Slc2a3   | 1427770_a_at | 1471 | 0.105367 | 0.333534 | Yes |
| Iqsec1   | 1452327_at   | 1505 | 0.104481 | 0.341927 | Yes |
| Egr2     | 1427683_at   | 1523 | 0.104042 | 0.350993 | Yes |
| Il2rg    | 1416296_at   | 1537 | 0.103788 | 0.360213 | Yes |
| Slc39a14 | 1425649_at   | 1545 | 0.103597 | 0.369684 | Yes |
| Dusp10   | 1417164_at   | 1676 | 0.100224 | 0.373340 | Yes |
| Nfkbie   | 1431843_a_at | 1726 | 0.098902 | 0.380491 | Yes |
| Bcl3     | 1418133_at   | 1728 | 0.098869 | 0.389783 | Yes |
| Akap5    | 1447301_at   | 1752 | 0.098371 | 0.398045 | Yes |
| Traf4    | 1416571_at   | 1782 | 0.097582 | 0.405965 | Yes |
| Nfkbid   | 1436074_at   | 1844 | 0.095810 | 0.412287 | Yes |
| Akap1    | 1418279_a_at | 1898 | 0.094583 | 0.418852 | Yes |
| Sema7a   | 1459903_at   | 1978 | 0.092608 | 0.424068 | Yes |
| Ier2     | 1416442_at   | 2063 | 0.090773 | 0.428887 | Yes |
| Slc23a2  | 1417330_at   | 2143 | 0.089744 | 0.433833 | Yes |
| Prdm1    | 1420425_at   | 2300 | 0.086922 | 0.435072 | Yes |
| Cd82     | 1416401_at   | 2537 | 0.082725 | 0.432340 | Yes |
| Invs     | 1419308_at   | 2616 | 0.081627 | 0.436564 | Yes |
| Cd72     | 1426112_a_at | 2699 | 0.080419 | 0.440495 | Yes |
| Plk3     | 1434496_at   | 2816 | 0.078758 | 0.442750 | Yes |
| Slamf1   | 1425571_at   | 2849 | 0.078269 | 0.448711 | Yes |
| Arhgap24 | 1424842_a_at | 2863 | 0.078080 | 0.455504 | Yes |
| Il4i1    | 1419192_at   | 2880 | 0.077883 | 0.462144 | Yes |
| Irf2bp2  | 1433634_at   | 2902 | 0.077538 | 0.468529 | Yes |
| Bcl2a1d  | 1419004_s_at | 3012 | 0.076173 | 0.470852 | Yes |
| Kynu     | 1430570_at   | 3219 | 0.073342 | 0.468575 | Yes |
| Ccr6     | 1450357_a_at | 3344 | 0.071731 | 0.469809 | Yes |
| Aldoc    | 1451461_a_at | 3413 | 0.070741 | 0.473451 | Yes |
| Mybbp1a  | 1423430_at   | 3604 | 0.068412 | 0.471423 | Yes |
| Zmiz2    | 1460739_at   | 3624 | 0.068189 | 0.477014 | Yes |
| Zbtb8a   | 1452063_at   | 3659 | 0.067775 | 0.481895 | Yes |
| Cr2      | 1425289_a_at | 3664 | 0.067731 | 0.488113 | Yes |
| Bhlhe40  | 1418025_at   | 3680 | 0.067450 | 0.493812 | Yes |
| Cd86     | 1420404_at   | 3723 | 0.066943 | 0.498258 | Yes |
| Irf4     | 1421173_at   | 3740 | 0.066647 | 0.503837 | Yes |

---

**Supplementary Table 6.** Pathway enrichment analysis of genes co-bound by CREBBP and BCL6 in human GC B cells

| Gene Set Name                                                                         | # Genes in Gene Set (K) | # Genes in Overlap (k) | k/K   | p-value  | FDR q-value |
|---------------------------------------------------------------------------------------|-------------------------|------------------------|-------|----------|-------------|
| <b>MSigDB analysis</b>                                                                |                         |                        |       |          |             |
| REACTOME_IMMUNE_SYSTEM                                                                | 933                     | 207                    | 0.222 | 5.27E-62 | 7.01E-59    |
| REACTOME_ADAPTIVE_IMMUNE_SYSTEM                                                       | 539                     | 122                    | 0.226 | 9.97E-38 | 6.63E-35    |
| KEGG_B_CELL_RECEPTOR_SIGNALING_PATHWAY                                                | 75                      | 41                     | 0.547 | 2.09E-30 | 9.27E-28    |
| PID_BCR_5PATHWAY                                                                      | 65                      | 36                     | 0.554 | 3.85E-27 | 1.02E-24    |
| REACTOME_CYTOKINE_SIGNALING_IN_IMMUNE_SYSTEM                                          | 270                     | 66                     | 0.244 | 5.62E-23 | 9.35E-21    |
| PID_CXCR4_PATHWAY                                                                     | 102                     | 40                     | 0.392 | 9.95E-23 | 1.47E-20    |
| SIG_BCR_SIGNALING_PATHWAY                                                             | 46                      | 27                     | 0.587 | 1.26E-21 | 1.40E-19    |
| KEGG_CHEMOKINE_SIGNALING_PATHWAY                                                      | 190                     | 52                     | 0.274 | 9.01E-21 | 8.56E-19    |
| REACTOME_SIGNALING_BY_THE_B_CELL_RECEPTOR_BCR                                         | 126                     | 42                     | 0.333 | 1.28E-20 | 1.06E-18    |
| KEGG_MAPK_SIGNALING_PATHWAY                                                           | 267                     | 61                     | 0.229 | 9.26E-20 | 7.24E-18    |
| REACTOME_SIGNALING_BY_RHO_GTPASES                                                     | 113                     | 38                     | 0.336 | 6.03E-19 | 4.22E-17    |
| REACTOME_INNATE_IMMUNE_SYSTEM                                                         | 279                     | 61                     | 0.219 | 9.36E-19 | 6.23E-17    |
| REACTOME_METABOLISM_OF_LIPIDS_AND_LIPOPROTEINS                                        | 478                     | 82                     | 0.172 | 8.69E-18 | 4.81E-16    |
| REACTOME_TOLL_RECEPTOR_CASCADES                                                       | 118                     | 37                     | 0.314 | 2.44E-17 | 1.30E-15    |
| REACTOME_SIGNALING_BY_ILS                                                             | 107                     | 35                     | 0.327 | 3.92E-17 | 2.00E-15    |
| REACTOME_ANTIGEN_ACTIVATES_B_CELL_RECEPTOR_LEADING_TO_GENERATION_OF_SECOND_MESSENGERS | 29                      | 19                     | 0.655 | 6.54E-17 | 3.11E-15    |
| REACTOME_SIGNALING_BY_GPCR                                                            | 920                     | 122                    | 0.133 | 2.03E-16 | 8.71E-15    |
| PID_IL2_1PATHWAY                                                                      | 55                      | 25                     | 0.455 | 1.39E-16 | 6.36E-15    |
| PID_PI3KCI_PATHWAY                                                                    | 49                      | 23                     | 0.469 | 9.38E-16 | 3.67E-14    |
| REACTOME_TRANSMEMBRANE_TRANSPORT_OF_SMALL_MOLECULES                                   | 413                     | 71                     | 0.172 | 1.21E-15 | 4.59E-14    |
| REACTOME_DOWNSTREAM_SIGNAL_TRANSDUCTION                                               | 95                      | 31                     | 0.326 | 2.61E-15 | 9.13E-14    |
| KEGG_CYTOKINE_CYTOKINE_RECEPTOR_INTERACTION                                           | 267                     | 54                     | 0.202 | 3.04E-15 | 1.04E-13    |
| REACTOME_GAB1_SIGNALOSOME                                                             | 38                      | 20                     | 0.526 | 4.10E-15 | 1.30E-13    |
| BIOCARTA_IL2RB_PATHWAY                                                                | 38                      | 20                     | 0.526 | 4.10E-15 | 1.30E-13    |
| KEGG_REGULATION_OF_ACTIN_CYTOSKELETON                                                 | 216                     | 47                     | 0.218 | 1.04E-14 | 3.15E-13    |
| KEGG_JAK_STAT_SIGNALING_PATHWAY                                                       | 155                     | 39                     | 0.252 | 1.26E-14 | 3.67E-13    |
| PID_IL4_2PATHWAY                                                                      | 65                      | 25                     | 0.385 | 1.63E-14 | 4.60E-13    |
| SIG_PIP3_SIGNALING_IN_B_LYMPHOCYTES                                                   | 36                      | 19                     | 0.528 | 1.87E-14 | 5.18E-13    |
| BIOCARTA_BCR_PATHWAY                                                                  | 37                      | 19                     | 0.514 | 3.62E-14 | 9.83E-13    |
| KEGG_FOCAL_ADHESION                                                                   | 201                     | 44                     | 0.219 | 5.81E-14 | 1.51E-12    |
| PID_RAC1_REG_PATHWAY                                                                  | 38                      | 19                     | 0.500 | 6.84E-14 | 1.72E-12    |
| BIOCARTA_MAPK_PATHWAY                                                                 | 87                      | 28                     | 0.322 | 8.48E-14 | 2.09E-12    |
| REACTOME_MYD88_MAL_CASCADE_INITIATED_ON_PLASMA_MEMBRANE                               | 83                      | 27                     | 0.325 | 1.75E-13 | 4.00E-12    |
| REACTOME_GPCR_DOWNSTREAM_SIGNALING                                                    | 805                     | 104                    | 0.129 | 1.81E-13 | 4.08E-12    |
| REACTOME_TRANS_GOLGI_NETWORK_VESICLE_BUDDING                                          | 60                      | 23                     | 0.383 | 1.97E-13 | 4.37E-12    |
| KEGG_FC_EPSILON_RI_SIGNALING_PATHWAY                                                  | 79                      | 26                     | 0.329 | 3.58E-13 | 7.80E-12    |
| PID_FCER1_PATHWAY                                                                     | 62                      | 23                     | 0.371 | 4.48E-13 | 9.31E-12    |
| REACTOME_ACTIVATED_TLR4_SIGNALLING                                                    | 93                      | 28                     | 0.301 | 5.50E-13 | 1.12E-11    |
| PID_MYC_REPRESS_PATHWAY                                                               | 63                      | 23                     | 0.365 | 6.65E-13 | 1.34E-11    |
| PID_IL6_7_PATHWAY                                                                     | 47                      | 20                     | 0.426 | 7.05E-13 | 1.40E-11    |
| PID_SMAD2_3NUCLEAR_PATHWAY                                                            | 82                      | 26                     | 0.317 | 9.58E-13 | 1.87E-11    |
| REACTOME_CELL_CYCLE                                                                   | 421                     | 66                     | 0.157 | 1.01E-12 | 1.91E-11    |
| REACTOME_GOLGI_ASSOCIATED_VESICLE_BIOGENESIS                                          | 53                      | 21                     | 0.396 | 1.02E-12 | 1.91E-11    |
| REACTOME_PHOSPHOLIPID_METABOLISM                                                      | 198                     | 41                     | 0.207 | 2.81E-12 | 5.05E-11    |
| PID_IFNG_PATHWAY                                                                      | 40                      | 18                     | 0.450 | 3.10E-12 | 5.35E-11    |
| ST_B_CELL_ANTIGEN_RECEPTOR                                                            | 40                      | 18                     | 0.450 | 3.10E-12 | 5.35E-11    |
| REACTOME_G_ALPHA1213_SIGNALLING_EVENTS                                                | 74                      | 24                     | 0.324 | 4.10E-12 | 6.90E-11    |

|                                                                                        |     |    |       |          |          |
|----------------------------------------------------------------------------------------|-----|----|-------|----------|----------|
| PID_P53_DOWNSTREAM_PATHWAY                                                             | 137 | 33 | 0.241 | 4.87E-12 | 7.99E-11 |
| BIOCARTA_FCER1_PATHWAY                                                                 | 41  | 18 | 0.439 | 5.21E-12 | 8.45E-11 |
| REACTOME_COSTIMULATION_BY_THE_CD28_FAMILY                                              | 63  | 22 | 0.349 | 5.93E-12 | 9.39E-11 |
| KEGG_TOLL_LIKE_RECEPTOR_SIGNALING_PATHWAY                                              | 102 | 28 | 0.275 | 6.70E-12 | 1.04E-10 |
| KEGG_PHOSPHATIDYLINOSITOL_SIGNALING_SYSTEM                                             | 76  | 24 | 0.316 | 7.83E-12 | 1.20E-10 |
| BIOCARTA_IL7_PATHWAY                                                                   | 17  | 12 | 0.706 | 1.00E-11 | 1.50E-10 |
| REACTOME_TRAF6_MEDIATED_INDUCATION_OF_NFKB_AND_MAP_KINASES_UPON_TLR7_8_OR_9_ACTIVATION | 77  | 24 | 0.312 | 1.07E-11 | 1.59E-10 |
| PID_ATF2_PATHWAY                                                                       | 59  | 21 | 0.356 | 1.17E-11 | 1.71E-10 |
| REACTOME_IL_3_5_AND_GM-CSF_SIGNALING                                                   | 43  | 18 | 0.419 | 1.40E-11 | 2.00E-10 |
| PID_FAS_PATHWAY                                                                        | 38  | 17 | 0.447 | 1.40E-11 | 2.00E-10 |
| REACTOME_GPCR_LIGAND_BINDING                                                           | 408 | 62 | 0.152 | 1.87E-11 | 2.65E-10 |
| REACTOME_REGULATION_OF_SIGNALING_BY_CBL                                                | 18  | 12 | 0.667 | 2.84E-11 | 3.90E-10 |
| PID_IL2_STAT5_PATHWAY                                                                  | 30  | 15 | 0.500 | 3.01E-11 | 4.04E-10 |
| PID_TELOMERASE_PATHWAY                                                                 | 68  | 22 | 0.324 | 3.37E-11 | 4.46E-10 |

*continues on next page*

**Supplementary Table 6 (continued).** Pathway enrichment analysis of genes co-bound by CREBBP and BCL6 in human GC B cells

| Category                                 | Term                                                                     | Count | %    | PValue   | Genes                                                                                                                                                                                                                                                                                                                                                                                                                            | Bonferroni | Benjamini | FDR      |
|------------------------------------------|--------------------------------------------------------------------------|-------|------|----------|----------------------------------------------------------------------------------------------------------------------------------------------------------------------------------------------------------------------------------------------------------------------------------------------------------------------------------------------------------------------------------------------------------------------------------|------------|-----------|----------|
| <b>DAVID analysis</b>                    |                                                                          |       |      |          |                                                                                                                                                                                                                                                                                                                                                                                                                                  |            |           |          |
| <b>Genes bound at promoter regions</b>   |                                                                          |       |      |          |                                                                                                                                                                                                                                                                                                                                                                                                                                  |            |           |          |
| KEGG_PATHWAY                             | hsa04662:B cell receptor signaling pathway                               | 16    | 2.91 | 0.000000 | PIK3CG, PIK3CD, NFKBIA, CD72, VAV1, CD19, DAPP1, RAC2, SOS1, PIK3CA, PIK3AP1, NFATC4, CD79A, INPP5D, PIK3R1, SYK                                                                                                                                                                                                                                                                                                                 | 0.000003   | 0.000003  | 0.000025 |
| PANTHER_PATHWAY                          | P00010:B cell activation                                                 | 15    | 2.73 | 0.000001 | PIK3CG, PTPRC, GRAP, PIK3CD, NFKBIA, MAPK10, VAV1, ITPR2, CD19, RAC2, SOS1, PIK3CA, NFATC4, CD79A, SYK                                                                                                                                                                                                                                                                                                                           | 0.000042   | 0.000042  | 0.000579 |
| KEGG_PATHWAY                             | hsa04670:Leukocyte transendothelial migration                            | 16    | 2.91 | 0.000009 | PIK3CG, ITGAL, ICAM1, GNAI3, NCF1, NCF4, PIK3CD, NCF1C, ITGA4, VAV1, CYBA, RASSF5, PTK2, RAC2, PIK3CA, PIK3R1, RHOH                                                                                                                                                                                                                                                                                                              | 0.001344   | 0.000672  | 0.011135 |
| PANTHER_PATHWAY                          | P00006:Apoptosis signaling pathway                                       | 15    | 2.73 | 0.000082 | PIK3CG, CFLAR, CREB1, MAP2K3, BCL2A1, PIK3CD, NFKBIA, MAPK10, BIRC3, DAXX, ATF6, PRKRA, CASP8, PIK3CA, KLHL20                                                                                                                                                                                                                                                                                                                    | 0.006213   | 0.002075  | 0.086254 |
| <b>Genes bound at TSS-distal regions</b> |                                                                          |       |      |          |                                                                                                                                                                                                                                                                                                                                                                                                                                  |            |           |          |
| PANTHER_PATHWAY                          | P00010:B cell activation                                                 | 35    | 1.76 | 0.000000 | GRAP, NFKBIA, RHOQ, LOC407835, FOS, GRAPL, CALML3, SOS1, PPP3CC, CD22, PPP3CA, NFATC2, NFATC3, BLNK, SYK, NFATC1, PIK3CG, PRKCA, PTPN6, PTPRC, VAV3, MAP2K1, LYN, MAPK10, PRKCE, VAV2, PRKCD, NFKBIL1, ITPR1, ITPR2, PRKCB, MAPK13, PLCG2, CD79B, IKBKB                                                                                                                                                                          | 0.000000   | 0.000000  | 0.000000 |
| KEGG_PATHWAY                             | hsa04662:B cell receptor signaling pathway                               | 31    | 1.55 | 0.000000 | PPP3R1, NFKBIA, LOC407835, FOS, RASGRP3, DAPP1, SOS1, CD22, PPP3CC, PIK3AP1, PPP3CA, INPP5D, NFATC2, PIK3R3, NFATC3, PIK3R1, NFATC1, BLNK, SYK, PIK3CG, PTPN6, VAV3, CR2, MAP2K1, LYN, MALT1, VAV2, PRKCB, PLCG2, CD79B, IKBKB                                                                                                                                                                                                   | 0.000000   | 0.000000  | 0.000001 |
| REACTOME_PATHWAY                         | REACT_11044:Signaling by Rho GTPases                                     | 31    | 1.55 | 0.000011 | FGD2, PREX1, RHOQ, AKAP13, ARHGAP17, MYO9B, ARHGAP15, STARD13, HMHA1, ARHGAP22, ARHGAP6, TAGAP, TIAM2, SOS1, RHOBTB2, INPP5B, RHOH, NGEF, BCR, VAV3, ABR, ARHGEF18, TRIO, ARHGEF12, VAV2, ARHGAP24, ARHGAP26, ARHGAP25, RASGRF1, CHN2, ARAP2                                                                                                                                                                                     | 0.000730   | 0.000365  | 0.011583 |
| PANTHER_PATHWAY                          | P00031:Inflammation mediated by chemokine and cytokine signaling pathway | 60    | 3.01 | 0.000127 | RHOQ, PTEN, CXCR5, GRAPL, CXCR4, IFNG, GNG2, XCR1, IFNGR1, GNG7, PRKCA, PIK3CG, SOCS3, MYLK3, PIK3C2B, RELB, CCL4L1, MYH9, PRKCE, PRKCD, PRKCB, ARPC1B, ALOX15, CCR7, CCR6, CX3CR1, GNB5, PTAFR, GRAP, CYTH1, CCR1, ADRBK2, NFKBIA, ADRBK1, ITGB1, CCL4, PTK2, STAT4, PTK2B, ALOX5AP, ITGB7, SOS1, CAMK2D, CAMK2B, INPP5D, NFATC2, NFATC3, NFATC1, VAV3, ITGA4, VAV2, ITPR1, ITPR2, RGS13, RGS20, RGS1, PLCG2, GRK6, JAK1, IKBKB | 0.012607   | 0.003167  | 0.140723 |

\* Only pathways relevant to mature B cell biology and with FDR<0.15 are retained in the table



**Supplementary Table 7.** Analysis of the rearranged *IGHV* genes and S $\mu$  region in B-cell lymphomas from *Crebbp floxed/C $\gamma$ 1-Cre/VavP-BCL2* mice

| Mouse ID | Genotype         | Histologic Diagnosis | Region amplified | Status  | V gene | JH gene | N of bp analyzed (J gene) | N of mutations | % mutations |
|----------|------------------|----------------------|------------------|---------|--------|---------|---------------------------|----------------|-------------|
| 31LN     | VavPBcl2/CBP HET | FL                   | IGHV-D-J         | C, M    | VH7183 | JH3     | 839                       | 11             | 1.31        |
| 47LN     | VavPBcl2/CBP HET | FL                   | IGHV-D-J         | C, M    | J558   | JH4     | 277                       | 21             | 7.58        |
| 73LN     | VavPBcl2/CBP HET | FL                   | IGHV-D-J         | C, M    | VH7183 | JH4     | 292                       | 41             | 14.04       |
| 83LN     | VavPBcl2/CBP HET | FL                   | IGHV-D-J         | C, UM   | J558   | JH4     | 290                       | 0              | 0.00        |
| 56LN     | VavPBcl2/CBP HET | FL                   | IGHV-D-J         | C, UM   | VHQ52  | JH2     | 1229                      | 0              | 0.00        |
| 9LN      | VavPBcl2/CBP WT  | FL                   | IGHV-D-J         | C, M    | VH7183 | JH4     | 280                       | 1              | 0.36        |
| 42MSLN   | VavPBcl2/CBP WT  | FL                   | IGHV-D-J         | C, M    | J558   | JH2     | 1237                      | 34             | 2.75        |
| 97LN     | VavPBcl2/CBP WT  | FL                   | IGHV-D-J         | C, M    | J558   | JH3     | 835                       | 45             | 5.39        |
| 40LN     | VavPBcl2/CBP WT  | FLIS                 | IGHV-D-J         | C, UM   | J558   | JH4     | 280                       | 0              | 0.00        |
| 84SP     | VavPBcl2/CBP WT  | FL                   | IGHV-D-J         | C, UM   | J588   | JH2     | 1230                      | 0              | 0.00        |
| 84LN     | VavPBcl2/CBP WT  | FL                   | IGHV-D-J         | C, UM   | J588   | JH2     | 1230                      | 0              | 0.00        |
| 75LN     | VavPBcl2/CBP HET | FLIS                 | IGHV-D-J         | P       | na     | na      | na                        | na             | na          |
| 75SP     | VavPBcl2/CBP HET | FLIS                 | IGHV-D-J         | P       | na     | na      | na                        | na             | na          |
| 31LN     | VavPBcl2/CBP HET | FL                   | IGH S $\mu$      | clonal* | na     | na      | 571                       | 2^             | 0.35        |
| 85LN     | VavPBcl2/CBP HET | FL                   | IGH S $\mu$      | clonal* | na     | na      | 396                       | 14             | 3.54        |
| 85SP     | VavPBcl2/CBP HET | FL                   | IGH S $\mu$      | clonal* | na     | na      | 405                       | 14             | 3.46        |
| 78LN     | VavPBcl2/CBP HET | FL                   | IGH S $\mu$      | clonal* | na     | na      | 503                       | 8              | 1.59        |
| 33LN     | VavPBcl2/CBP HET | FL                   | IGH S $\mu$      | clonal* | na     | na      | 578                       | 15             | 2.60        |
| 54LN     | VavPBcl2/CBP WT  | FL                   | IGH S $\mu$      | clonal* | na     | na      | 572                       | 5              | 0.87        |
| 9LN      | VavPBcl2/CBP WT  | FL                   | IGH S $\mu$      | clonal* | na     | na      | 572                       | 1              | 0.17        |
| 42MSLN   | VavPBcl2/CBP WT  | FL                   | IGH S $\mu$      | clonal* | na     | na      | 563                       | 6              | 1.07        |
| 97LN     | VavPBcl2/CBP WT  | FL                   | IGH S $\mu$      | clonal* | na     | na      | 569                       | 7              | 1.23        |
| 84LN     | VavPBcl2/CBP WT  | FL                   | IGH S $\mu$      | clonal* | na     | na      | 573                       | 13             | 2.27        |

Abbreviations: LN, lymph node; SP, spleen; MSLN, mesenteric lymph node; C=clonal; P=polyclonal. M=mutated; UM=unmutated; na, not applicable (no clonal VDJ rearrangement amplified, or S $\mu$  region analysis).

V gene mutations analyzed with IMGT; J gene mutations analyzed by BLAST to the most similar mouse strain

\* as assessed based on Southern blot analysis of the rearranged IGHV genes

^ including one deletion of 350bp

**Supplementary Table 8.** List of antibodies used in FACS analysis

| Antibody name | Source          | Catalog #   | clone #   | Fluorochrome     | Dilution Factor |
|---------------|-----------------|-------------|-----------|------------------|-----------------|
| BCL6          | BD Pharmingen   | 561525      | K112-91   | Alex Fluo 647    | 1:50            |
| CD4           | BD Pharmingen   | 553051      | RM4-5     | APC              | 1:100           |
| IgG1          | BD Pharmingen   | 550874      | X56       | APC              | 1:100           |
| IgM           | BD Pharmingen   | 550676      | II/41     | APC              | 1:100           |
| MAC1          | BD Pharmingen   | 553312      | M1/70     | APC              | 1:100           |
| CD86          | eBioscience     | 17-0862     | GL1       | APC              | 1:400           |
| BrdU          | BD Pharmingen   | 552598      | nd        | APC              | 1:50            |
| CD19          | BD Pharmingen   | 553785      | 1D3       | FITC             | 1:100           |
| CD21          | BD Pharmingen   | 553818      | 7G6       | FITC             | 1:100           |
| Ig,k          | BD Pharmingen   | 550003      | 187.1     | FITC             | 1:100           |
| CD93          | BD Pharmingen   | 559156      | AA4.1     | FITC             | 1:100           |
| Annexin V     | BD Pharmingen   | 556419      | na        | FITC             | 1:20            |
| CD38          | eBioscience     | 11-0381     | 90        | FITC             | 1:100           |
| PNA           | Vector          | FL-1071     | na        | FITC             | 1:100           |
| CD138         | BD Pharmingen   | 553714      | 281-2     | PE               | 1:100           |
| CD23          | BD Pharmingen   | 553139      | B3B4      | PE               | 1:100           |
| CD95          | BD Pharmingen   | 554258      | Jo2       | PE               | 1:100           |
| IgD           | BD Pharmingen   | 558597      | 11-26c.2a | PE               | 1:100           |
| B220          | BD Pharmingen   | 553090      | RA3-6B2   | PE               | 1:100           |
| CD43          | BD Pharmingen   | 553271      | S7        | PE               | 1:100           |
| CD5           | BD Pharmingen   | 553023      | 53-7.3    | PE               | 1:100           |
| CD8           | BD Pharmingen   | 553032      | 53-6.7    | PE               | 1:100           |
| GL7           | BioLegend       | 144607      | GL7       | PE               | 1:100           |
| CD19          | BD Pharmingen   | 562329      | 1D3       | PE-CF594         | 1:100           |
| CD95          | BD Pharmingen   | 557653      | Jo2       | PE-Cy7           | 1:250           |
| CD93          | ebioscience     | 25-5892     | AA4.1     | PE-Cy7           | 1:100           |
| B220          | BD Pharmingen   | 553093      | RA3-6B2   | PerCP-Cy5.5      | 1:100           |
| CXCR4         | eBioscience     | 46-9991     | 2B11      | PerCP-eFluor 710 | 1:100           |
| IgD           | Miltenyi biotec | 130-103-005 | 11-26c.2a | VioGreen         | 1:50            |

na, not applicable; nd, not determined
